# Supplementary material
Source: PubMed Central journal article supplement (PMC8127828)
Supplement: 41586_2014_BFnature13679_MOESM56_ESM.pdf [file 41586_2014_BFnature13679_MOESM56_ESM.pdf]

## **BAC analysis**

|                                                                         |     |
|-------------------------------------------------------------------------|-----|
| BACs against NLeu1 with more than 1 block aligned in the assembly ..... | 3   |
| BACs against NLeu1 with 1 block aligned in the assembly .....           | 27  |
| BACs against NLeu3 with more than 1 block aligned in the assembly ..... | 246 |
| BACs against NLeu3 with 1 block aligned in the assembly .....           | 269 |

**Nleu1**

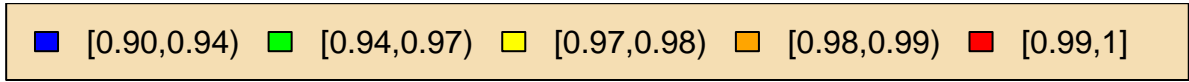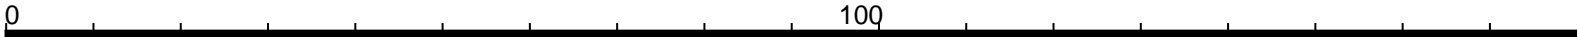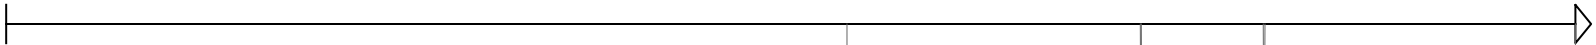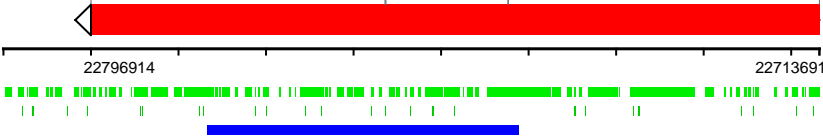

KBases BAC  
Gaps in BAC  
AC198148.2

GL397300.1

Rpts  
Tandem Rpts  
SDs  
Gaps

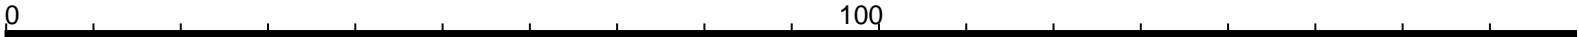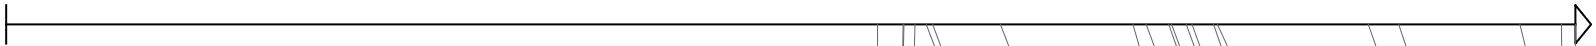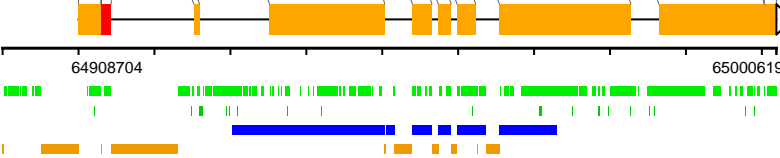

KBases BAC  
Gaps in BAC  
AC198148.2

GL397261.1

Rpts  
Tandem Rpts  
SDs  
Gaps

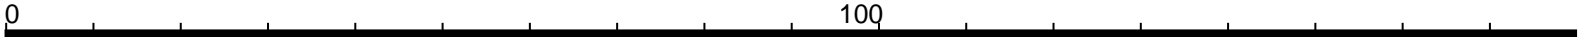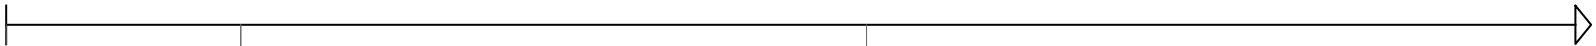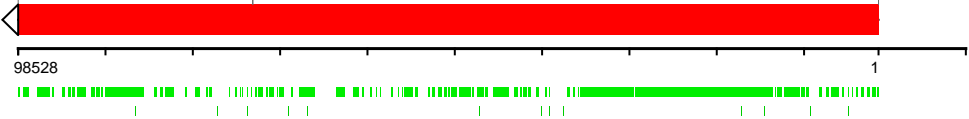

KBases BAC  
Gaps in BAC  
AC198148.2

GL397268.1

Rpts  
Tandem Rpts  
SDs  
Gaps

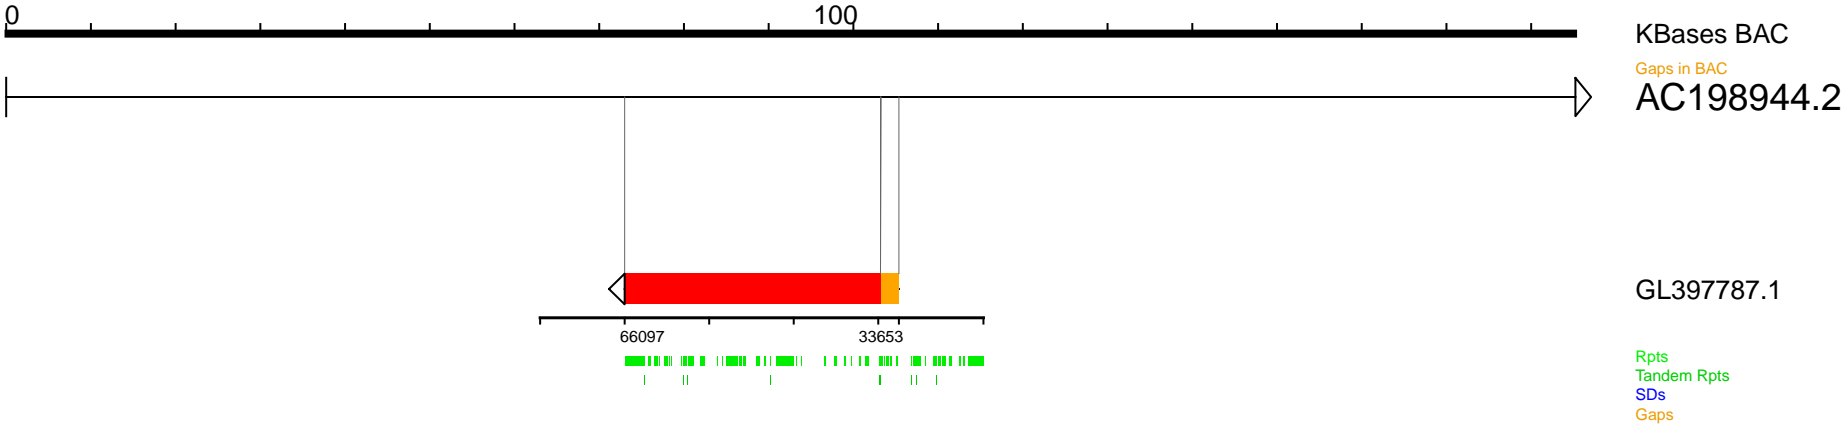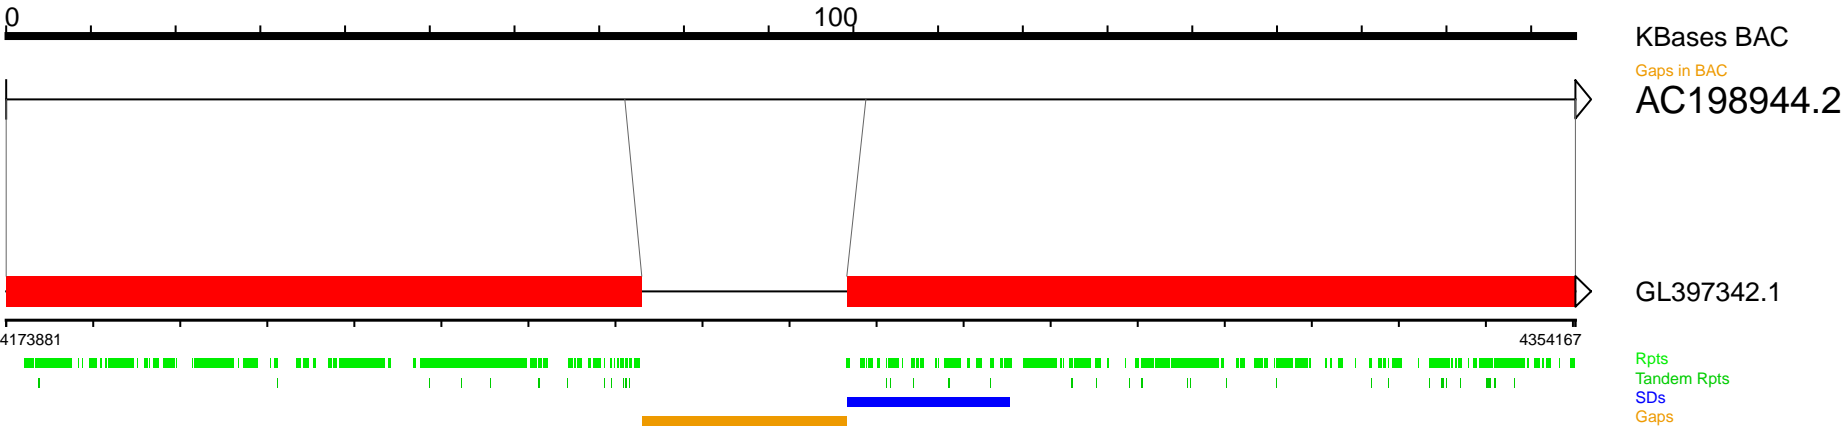

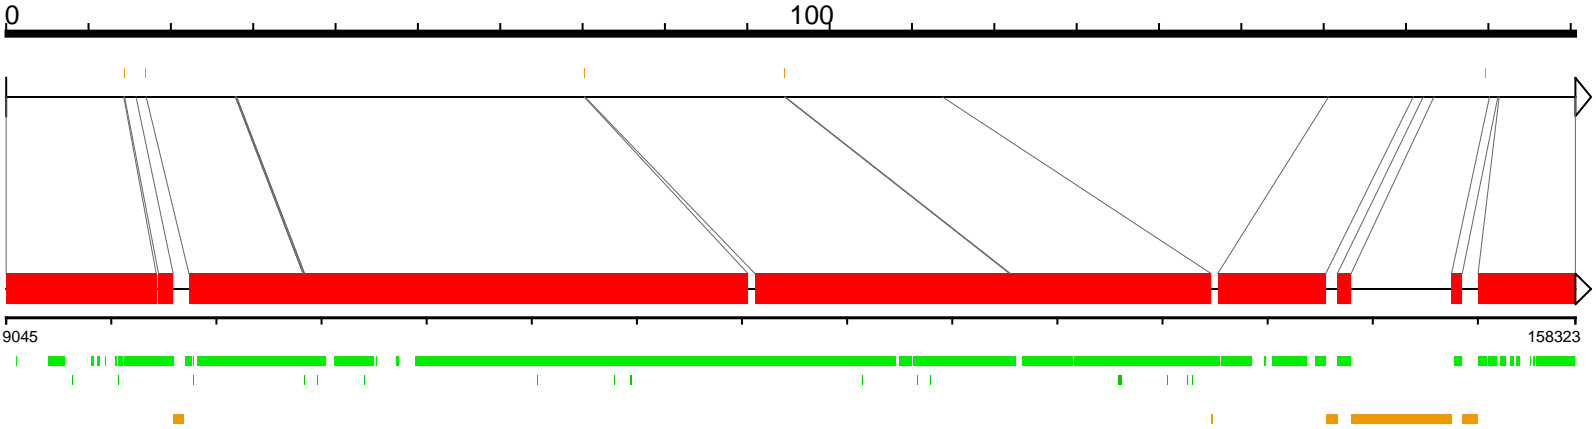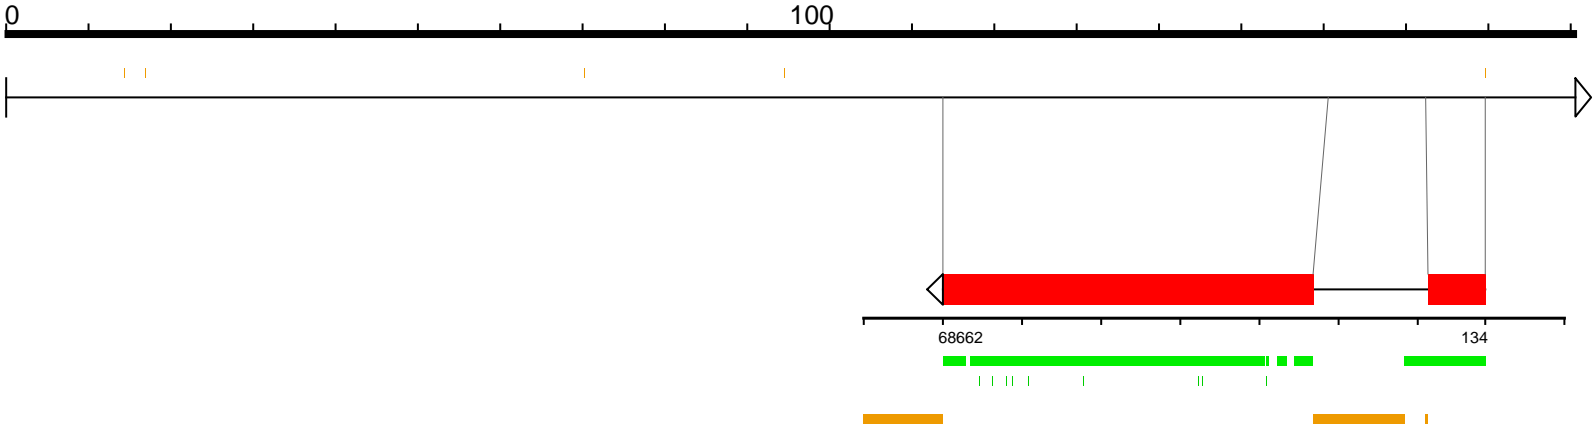

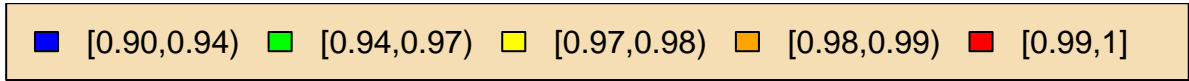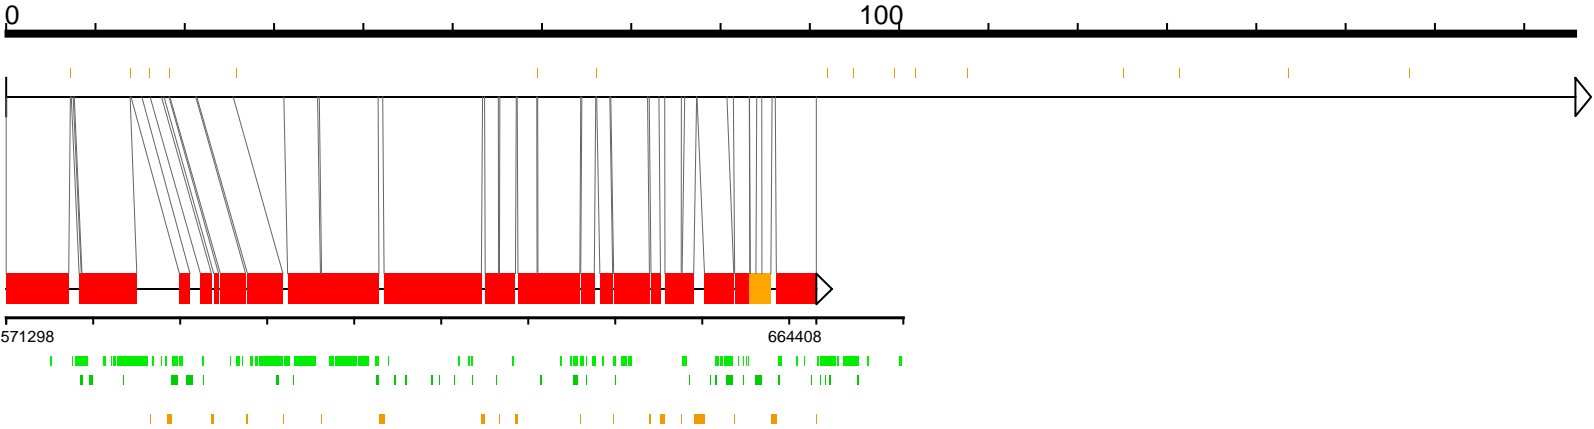

KBases BAC  
Gaps in BAC  
**AC205749.3**

GL397537.1

Rpts  
Tandem Rpts  
SDs  
Gaps

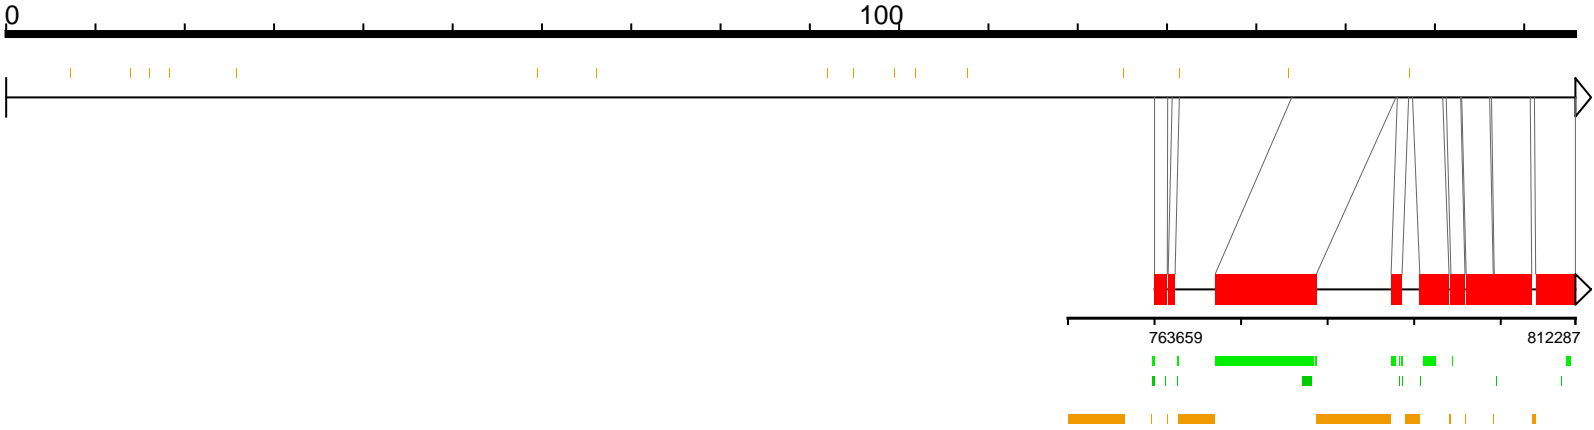

KBases BAC  
Gaps in BAC  
**AC205749.3**

GL397537.1

Rpts  
Tandem Rpts  
SDs  
Gaps

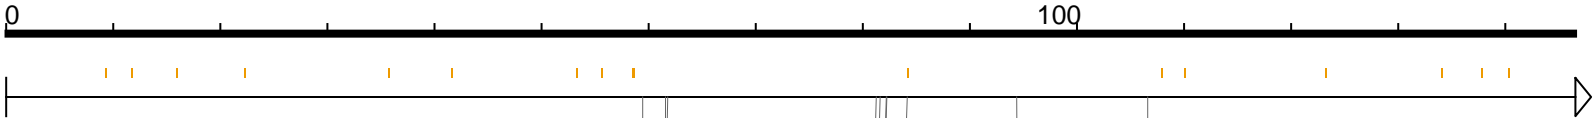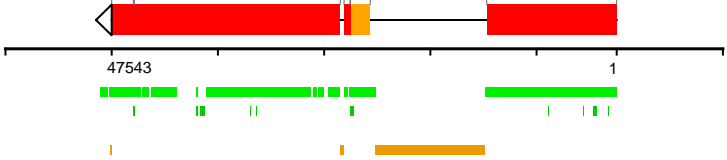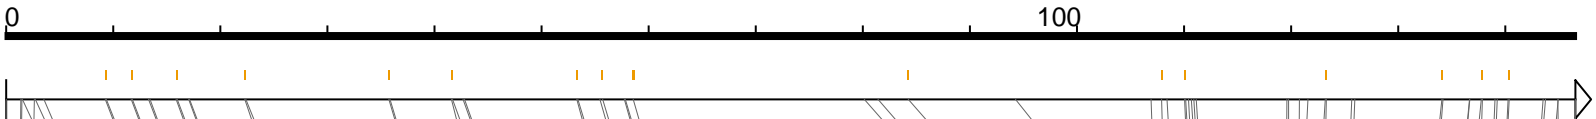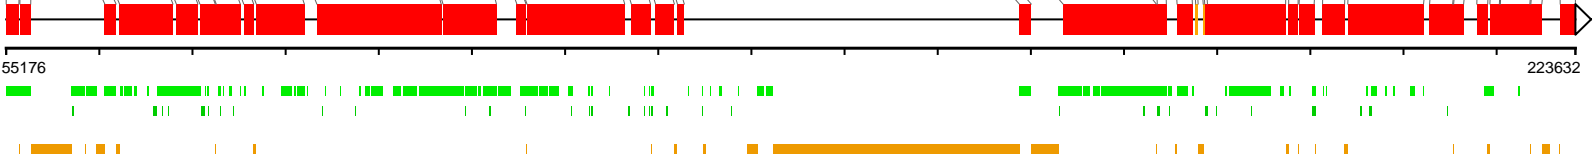

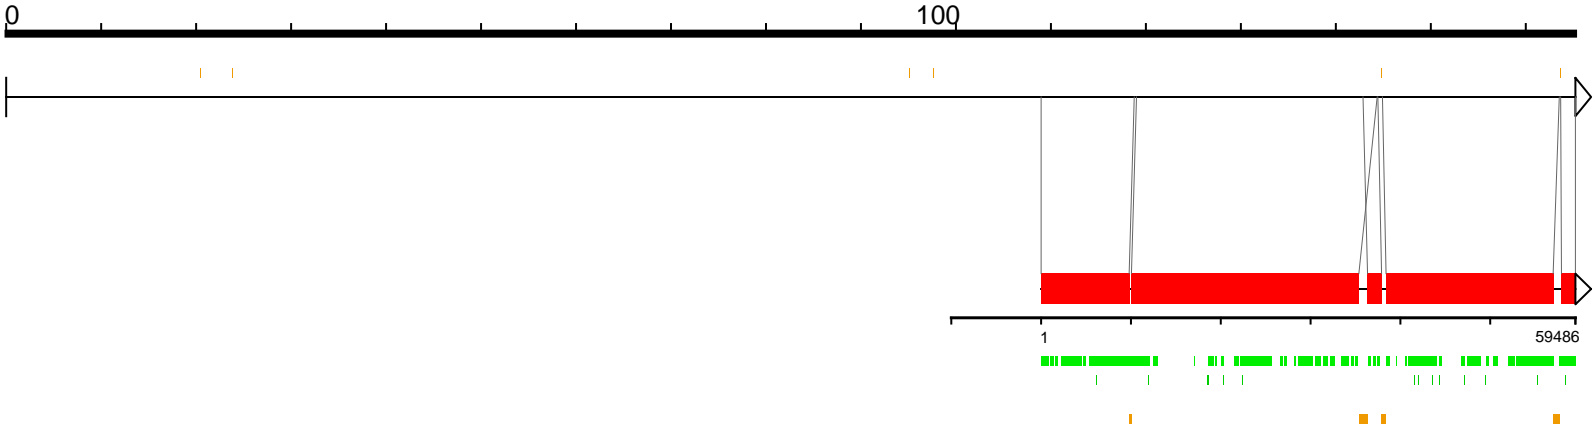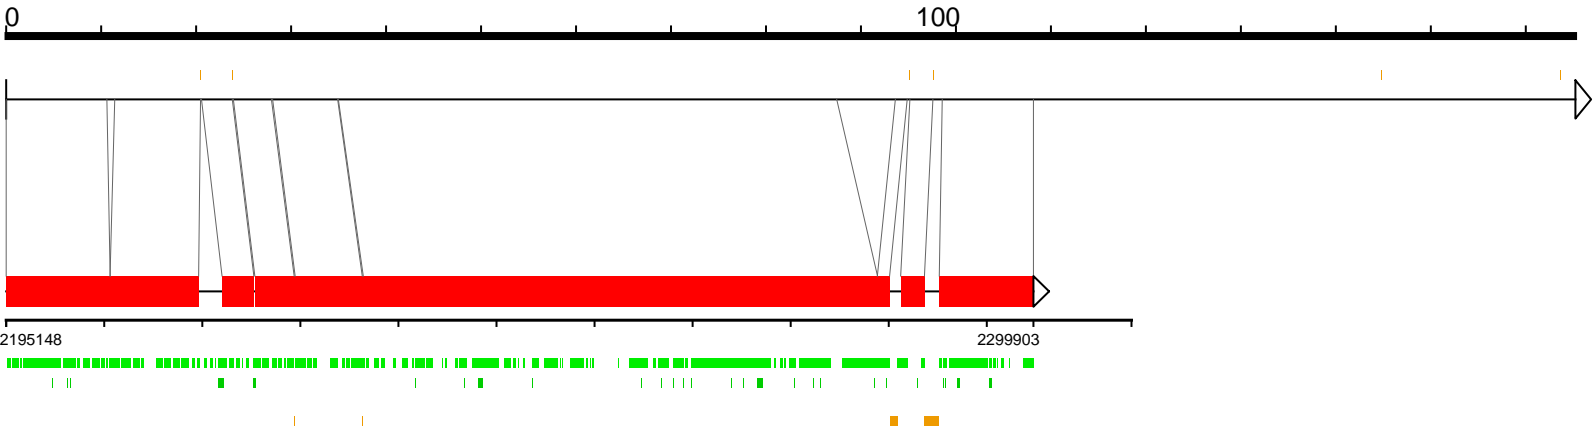

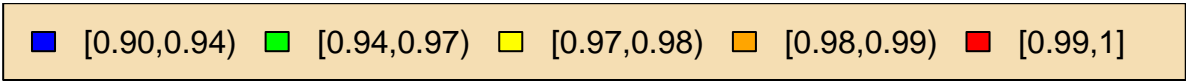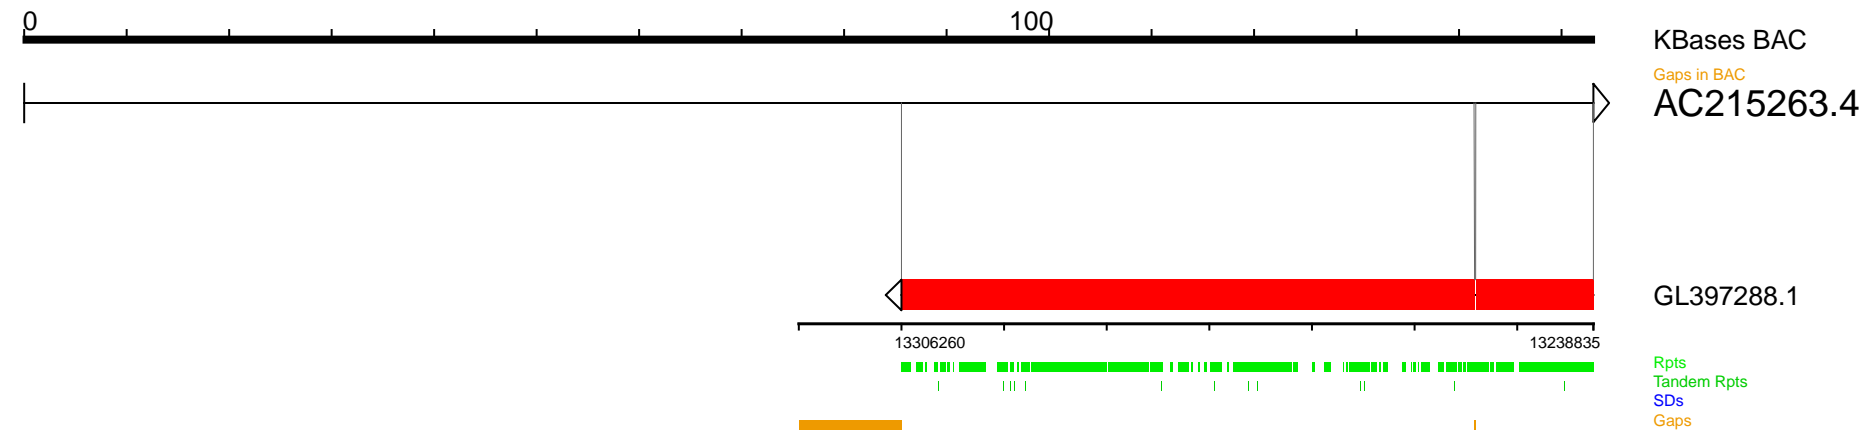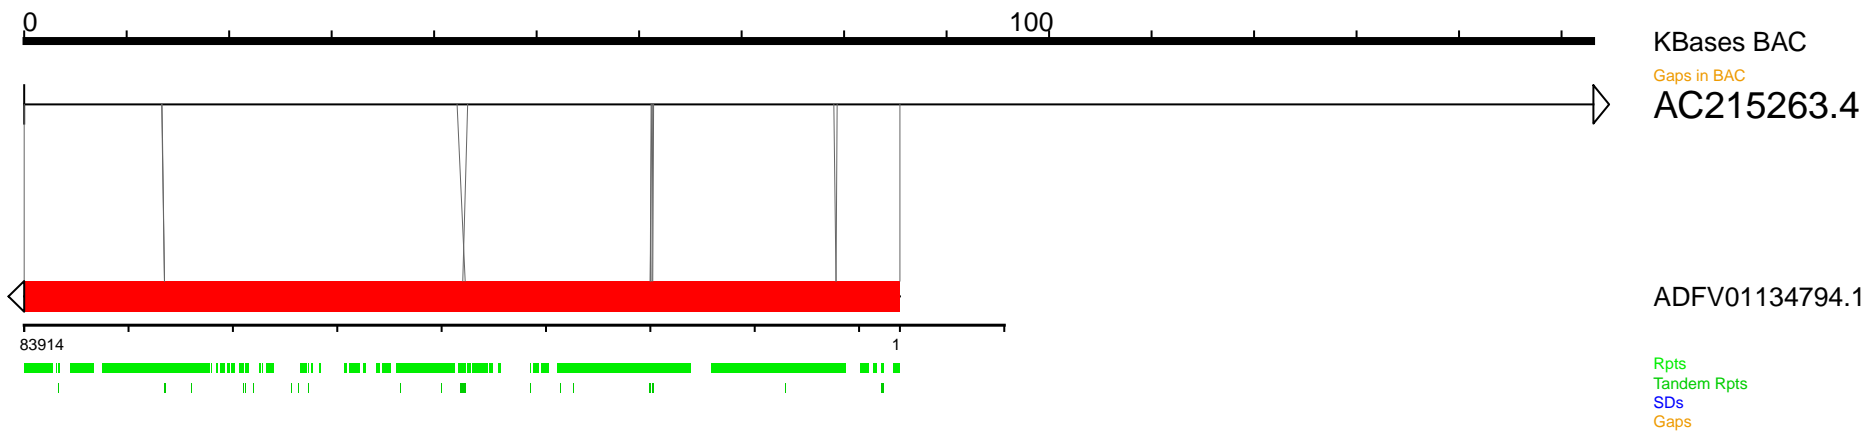

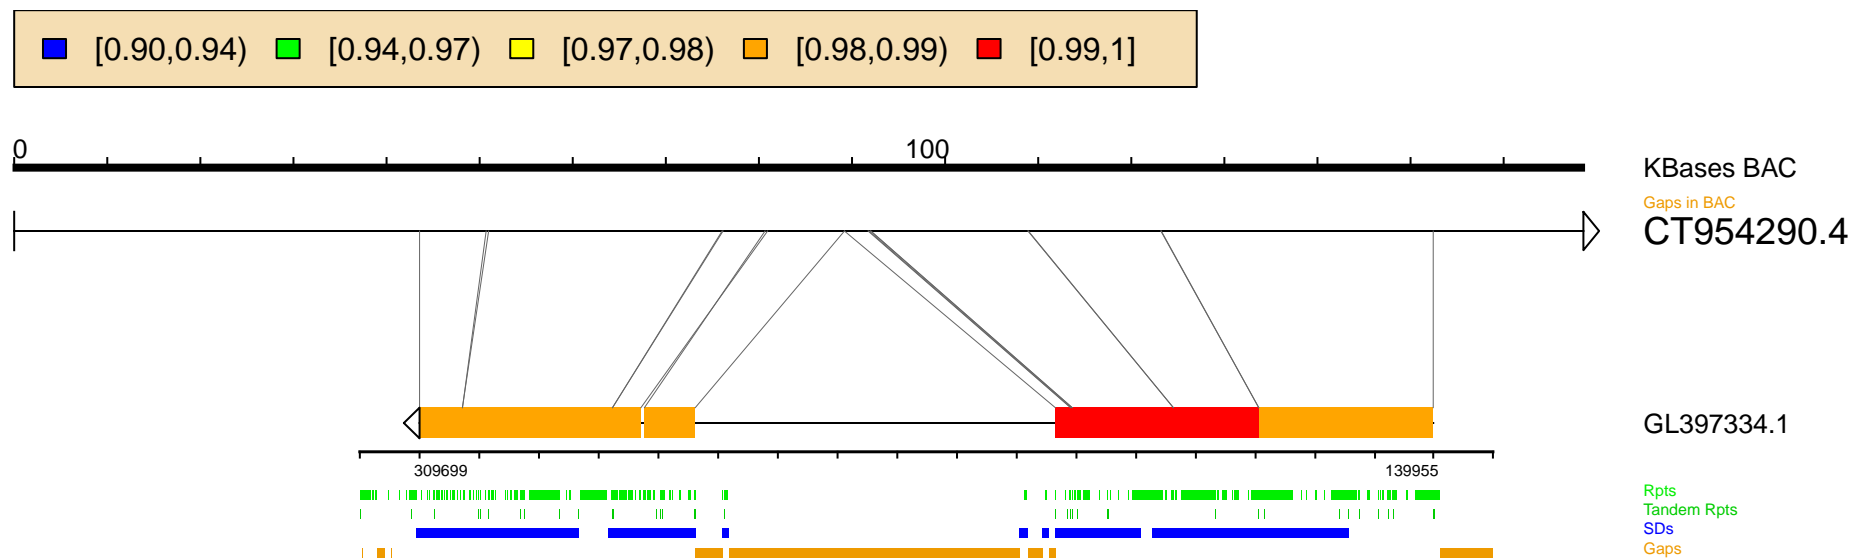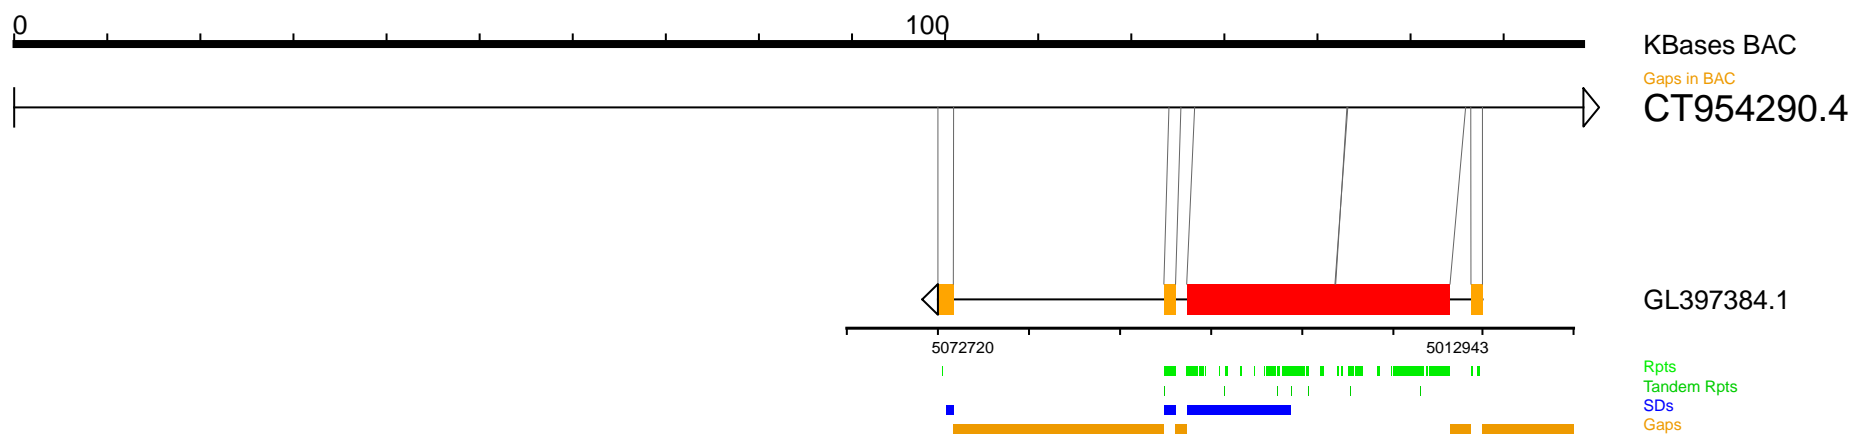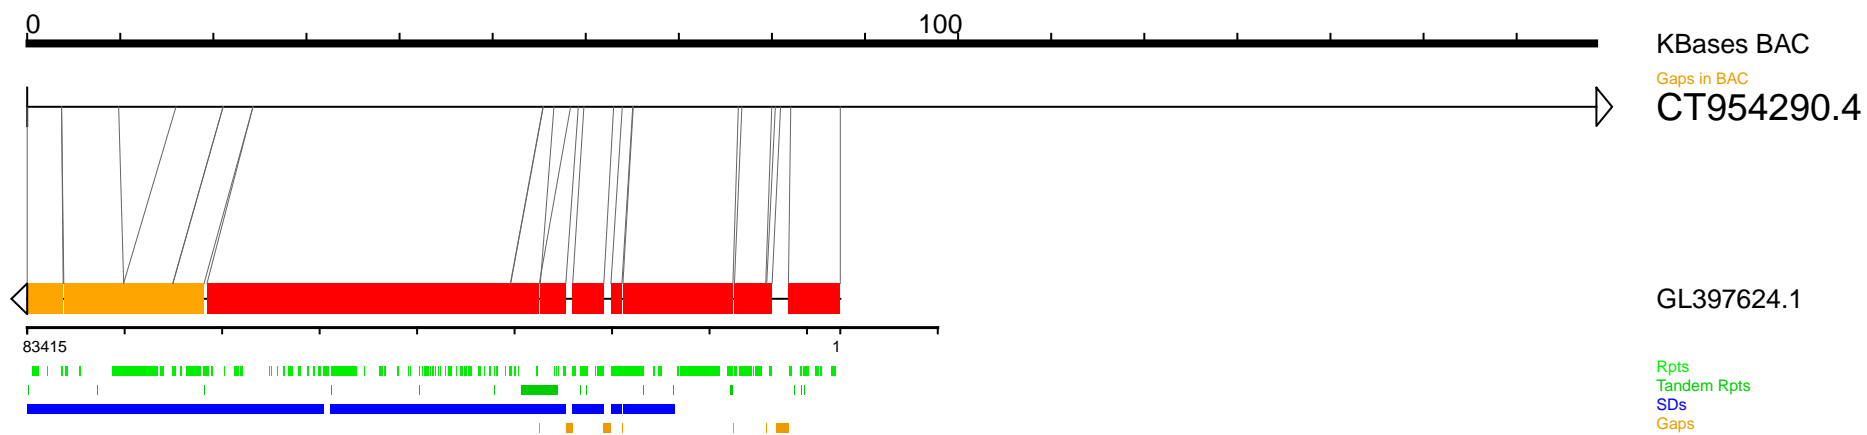

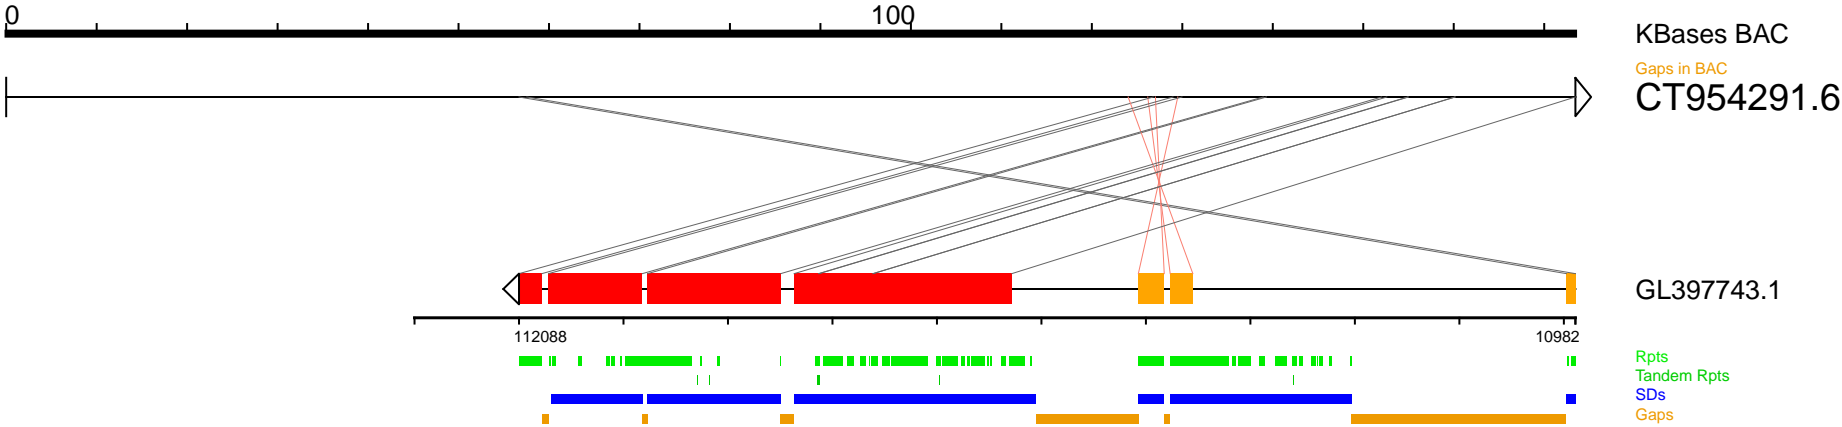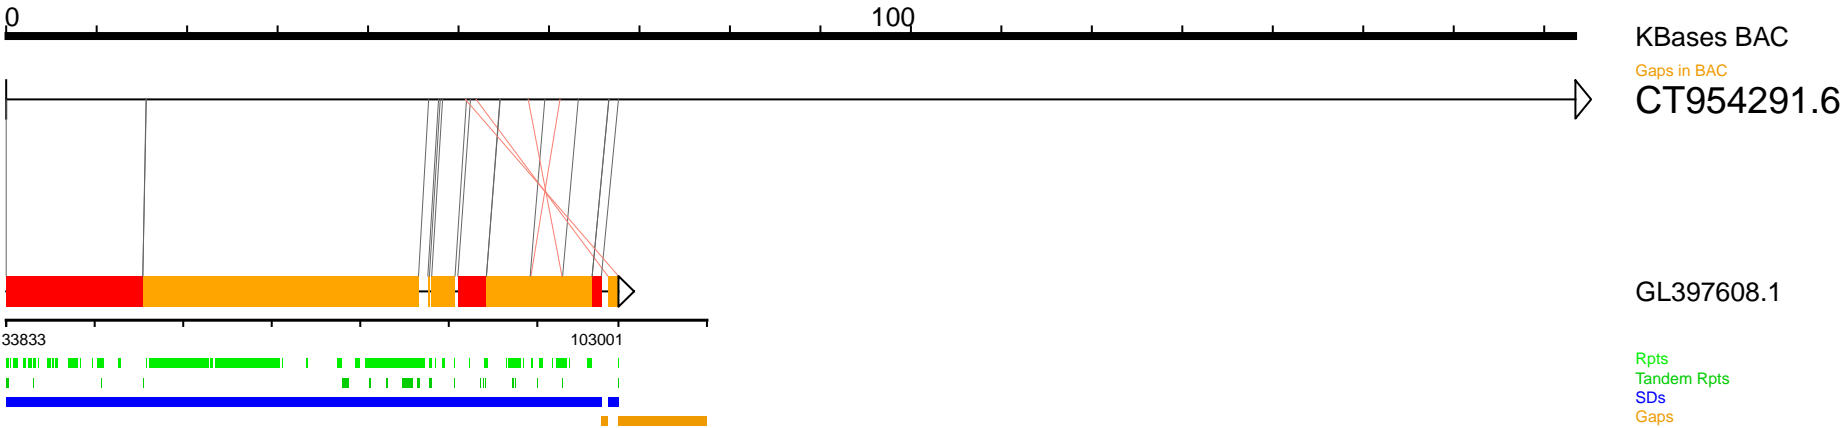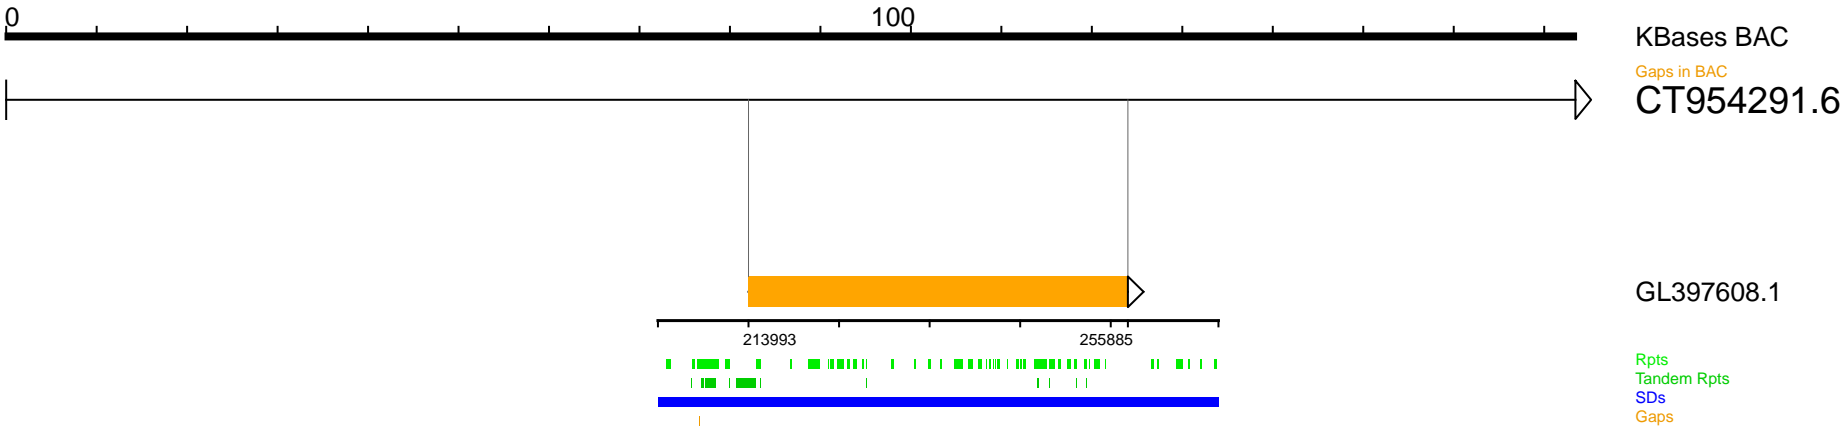

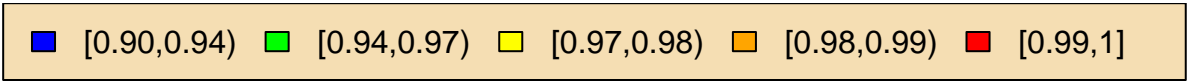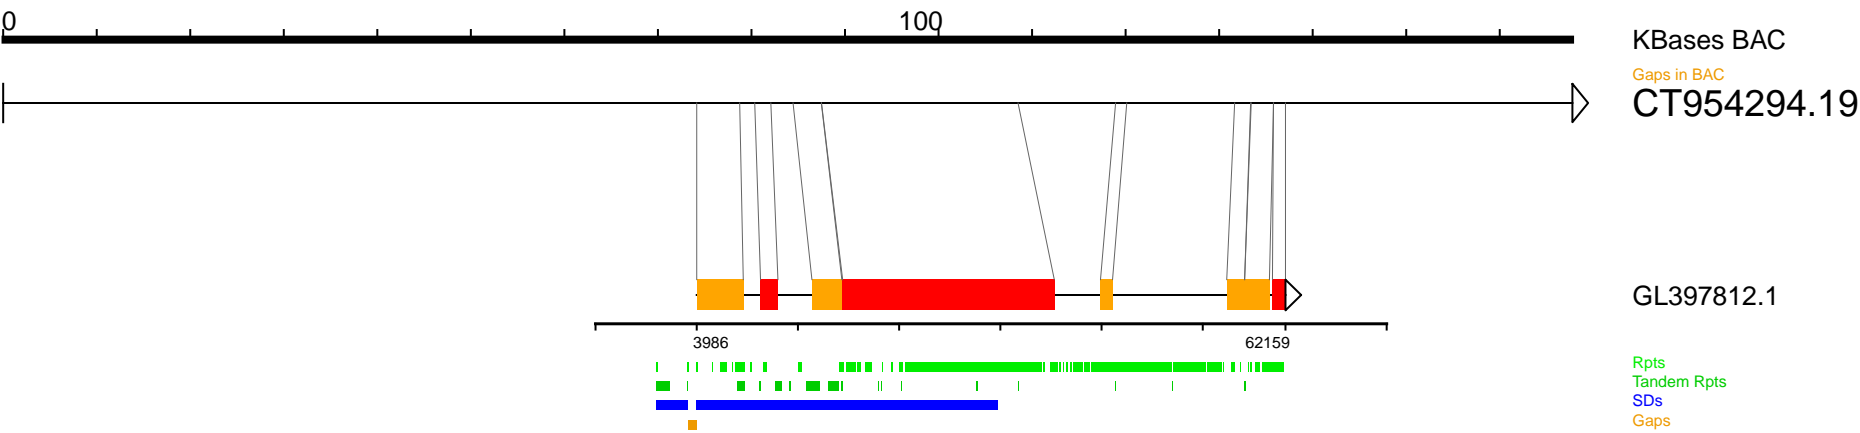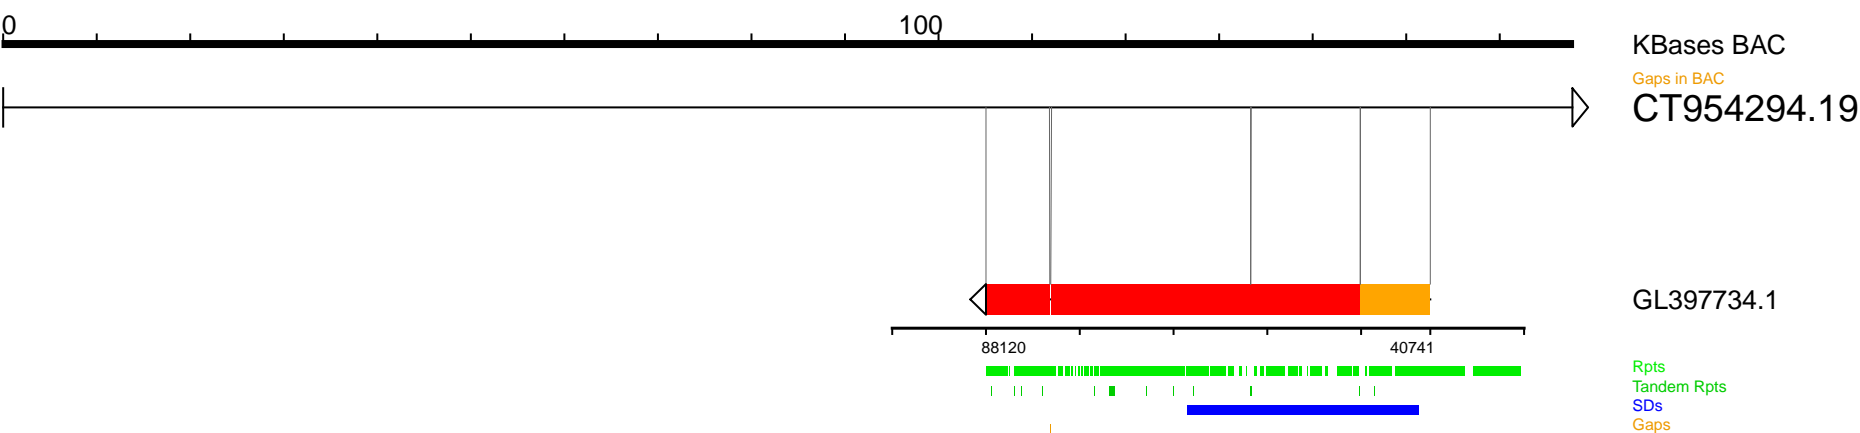

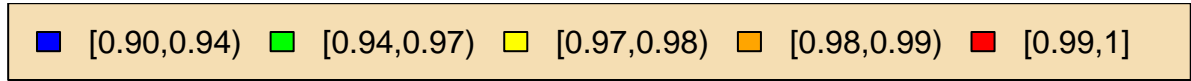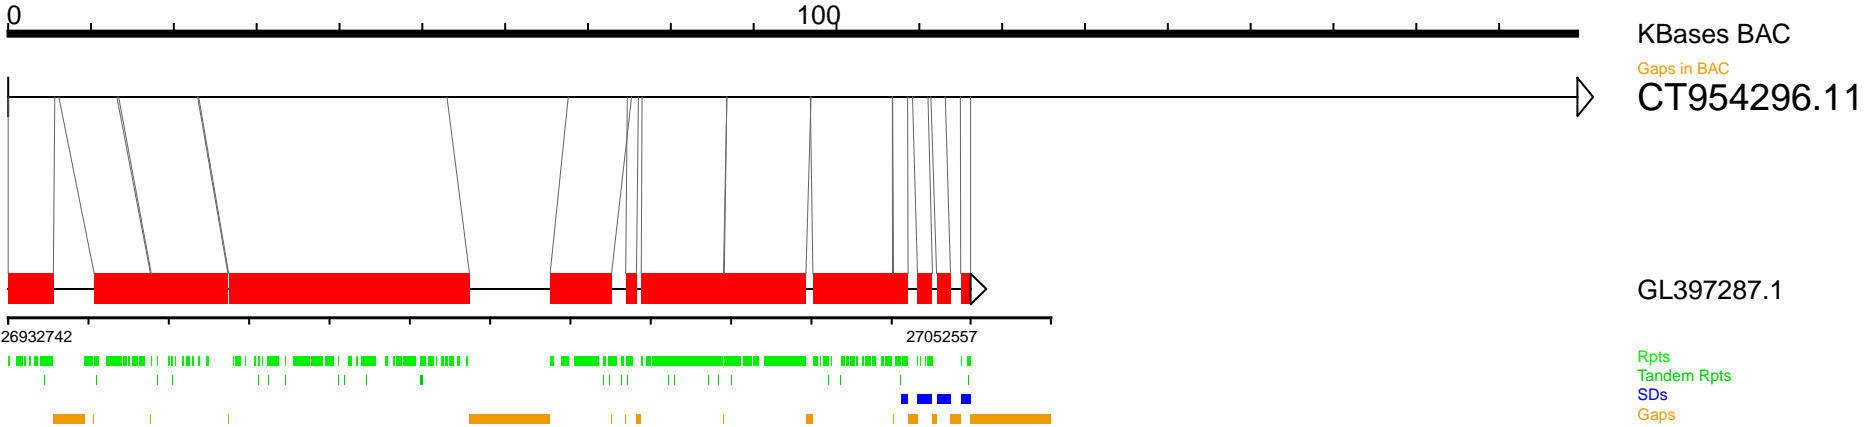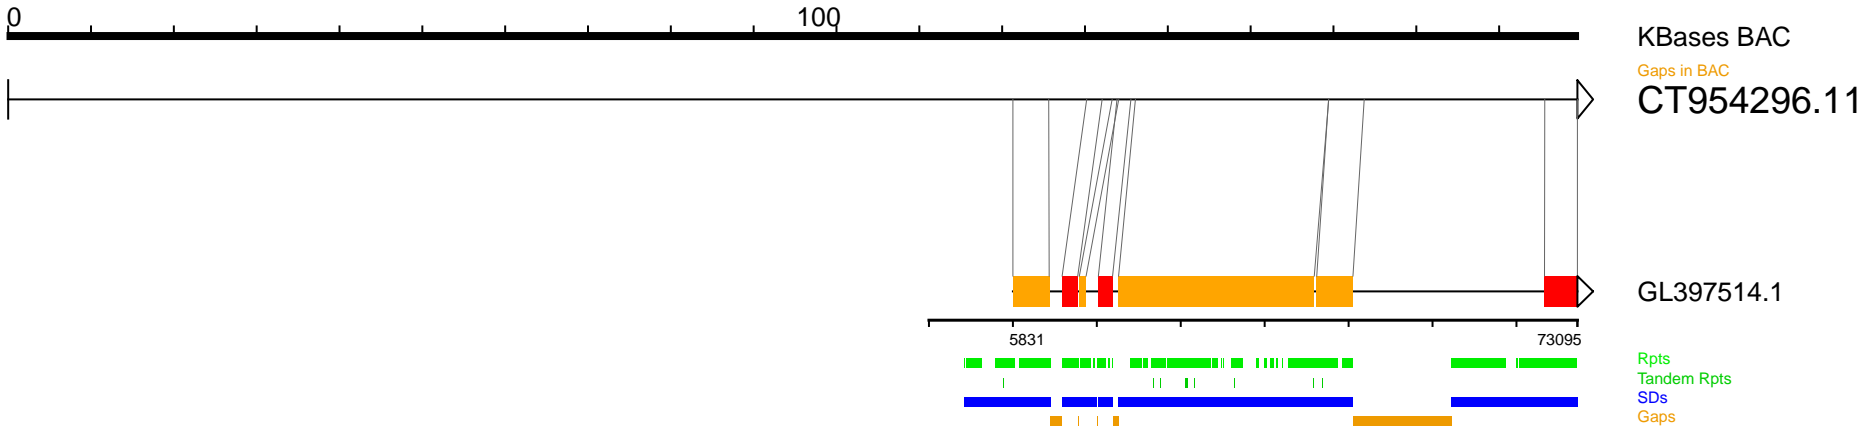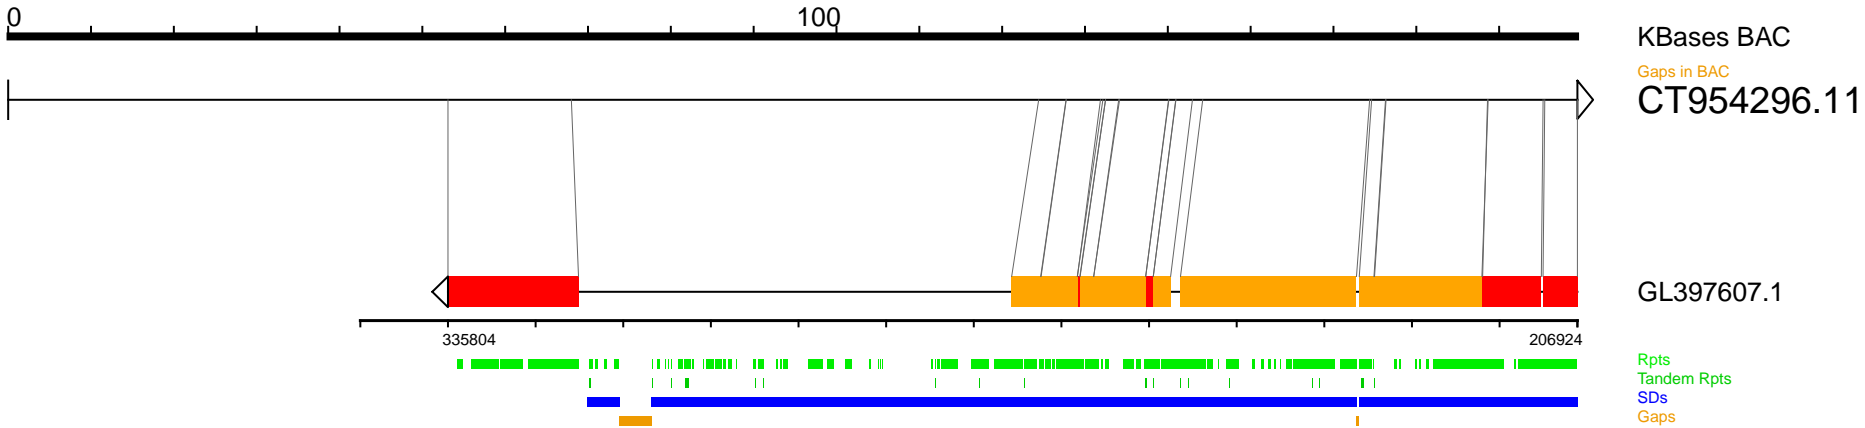

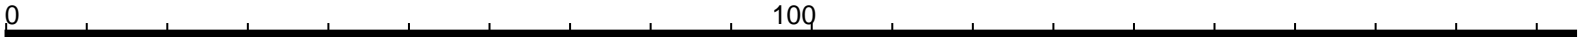

KBases BAC

Gaps in BAC

CT954297.11

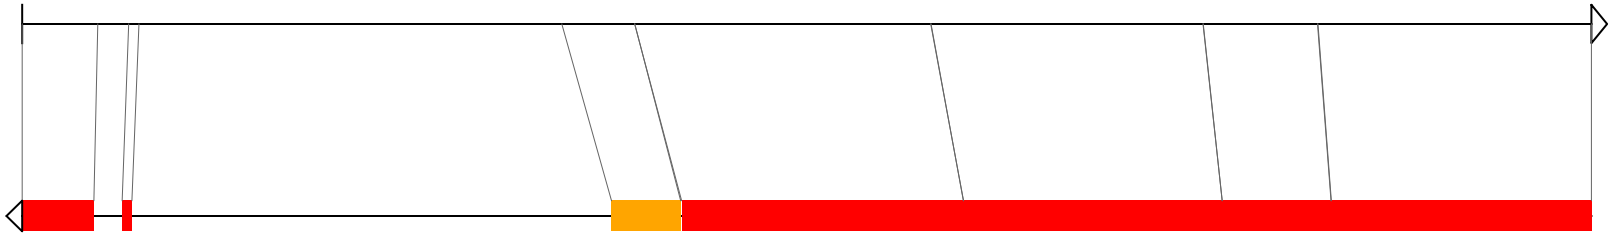

GL397431.1

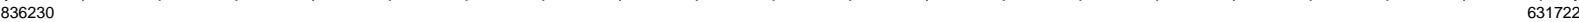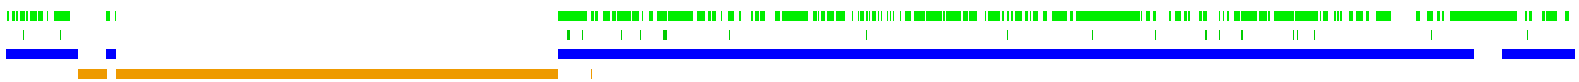

Rpts  
Tandem Rpts  
SDs  
Gaps

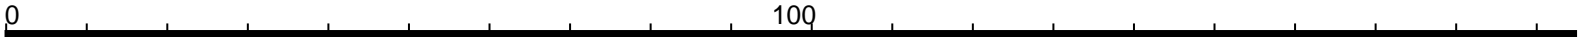

KBases BAC

Gaps in BAC

CT954297.11

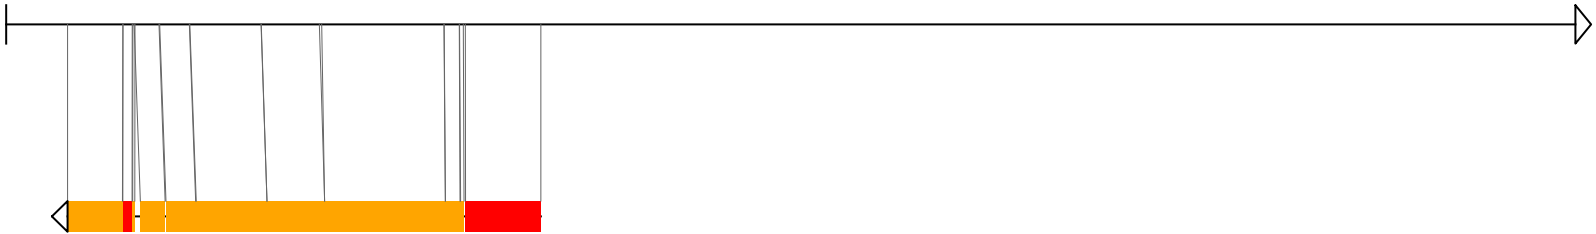

GL397431.1

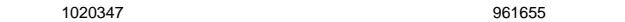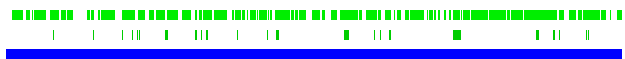

Rpts  
Tandem Rpts  
SDs  
Gaps

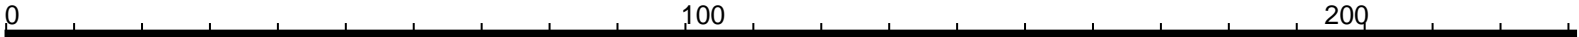

KBases BAC

Gaps in BAC

CT954298.5

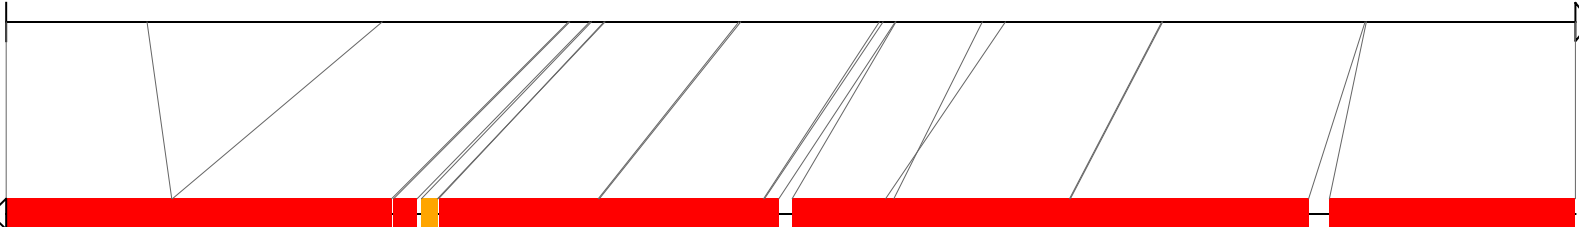

GL397261.1

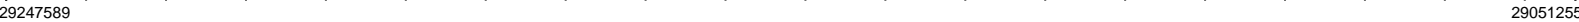

Rpts  
Tandem Rpts  
SDs  
Gaps

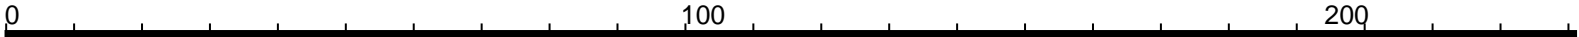

KBases BAC

Gaps in BAC

CT954298.5

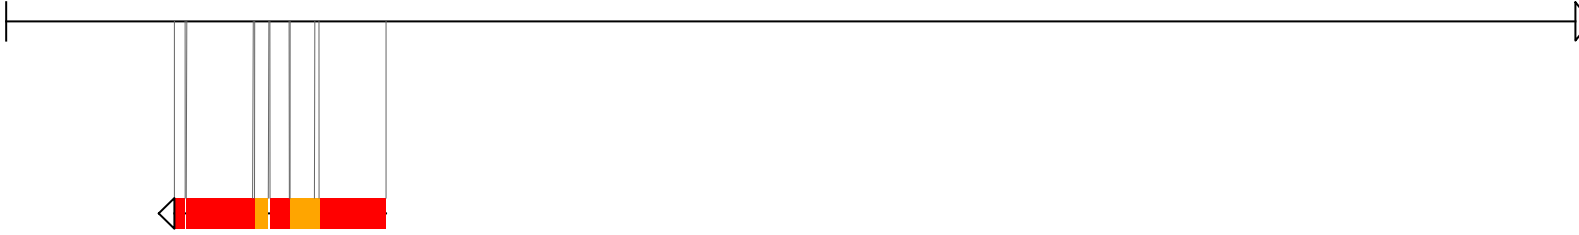

GL398044.1

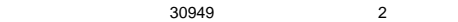

Rpts  
Tandem Rpts  
SDs  
Gaps

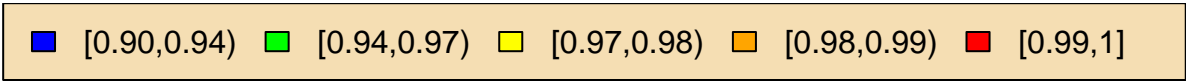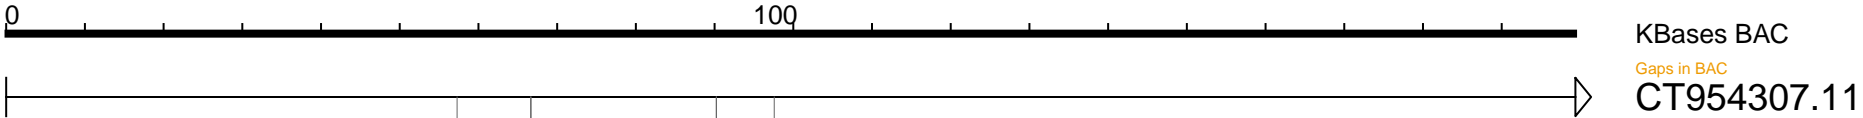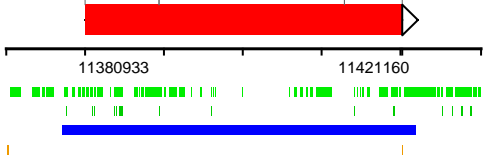

GL397275.1

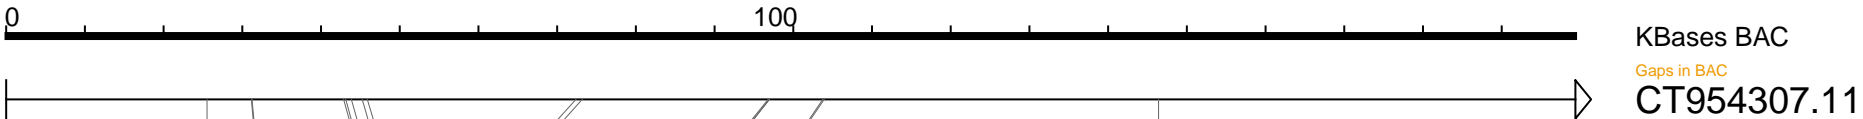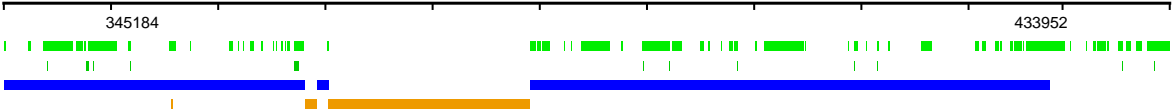

GL397564.1

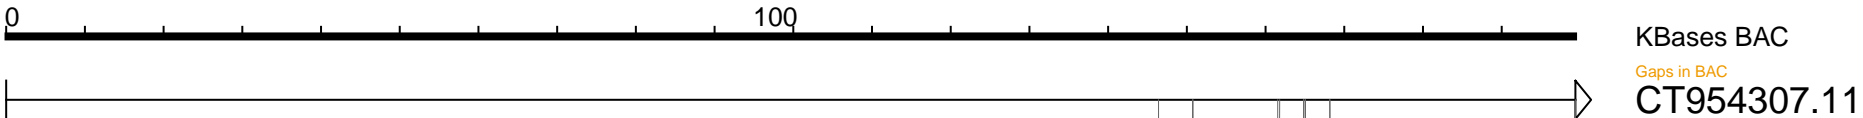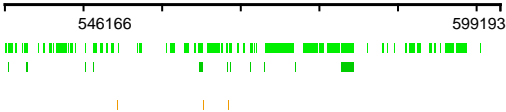

GL397564.1

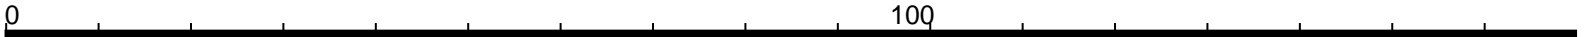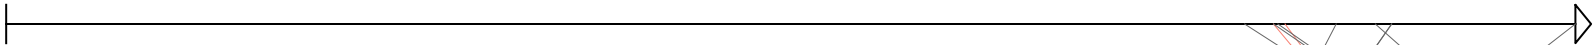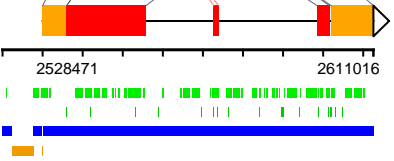

KBases BAC  
Gaps in BAC

GL397431.1

Rpts  
Tandem Rpts  
SDs  
Gaps

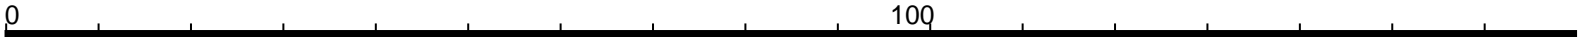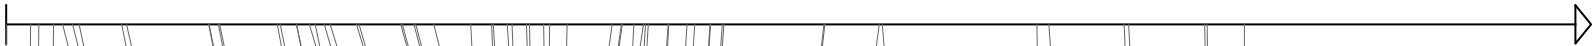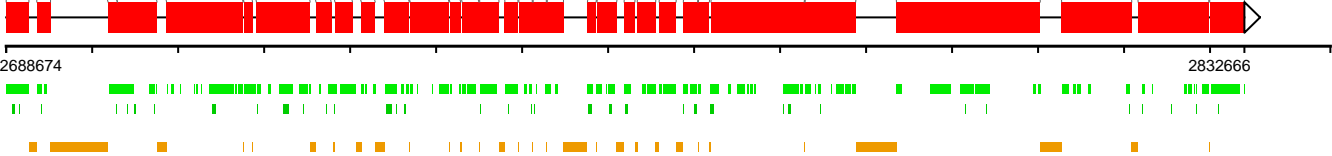

KBases BAC  
Gaps in BAC

GL397431.1

Rpts  
Tandem Rpts  
SDs  
Gaps

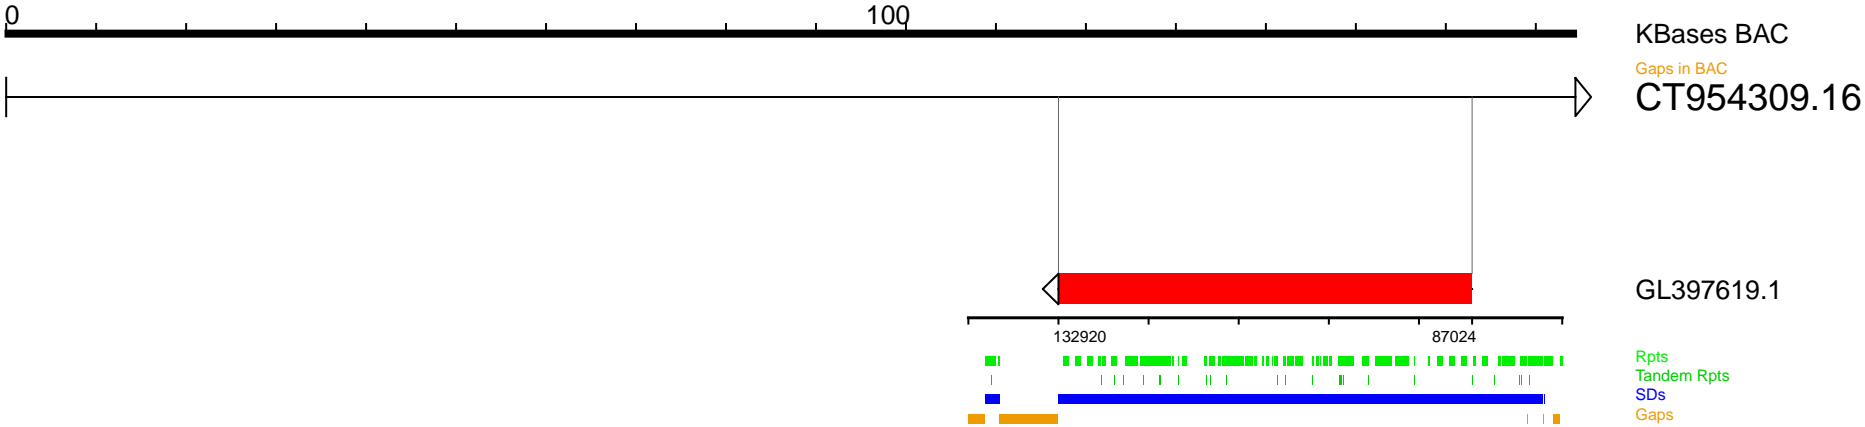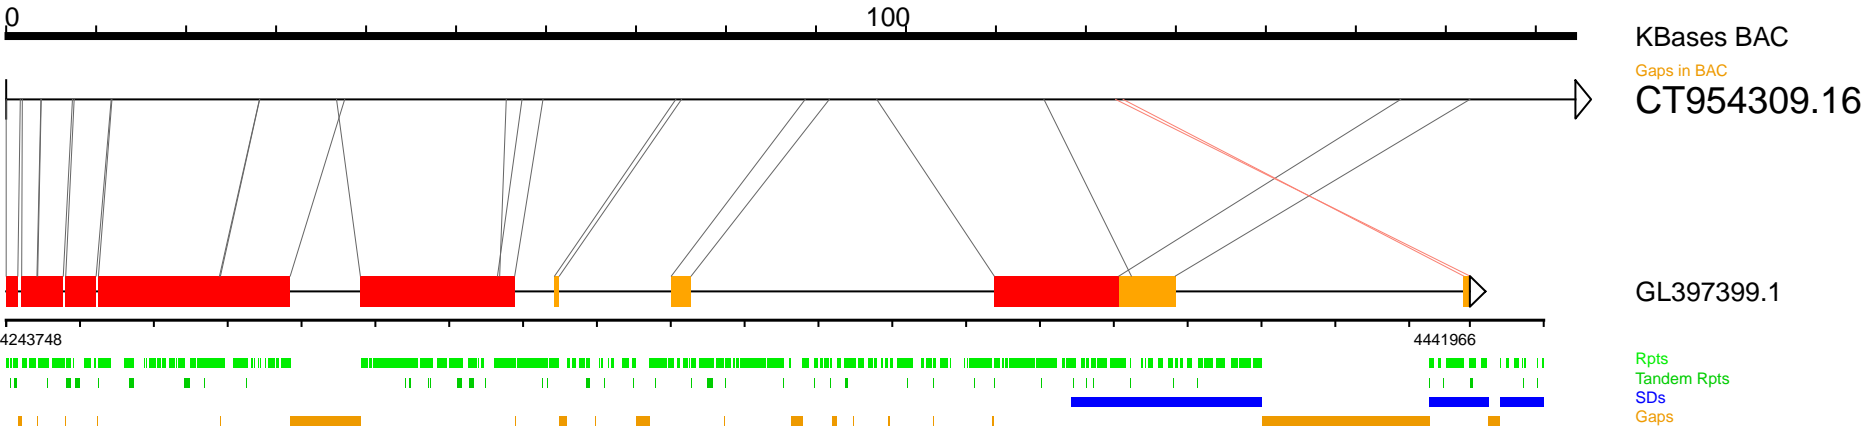

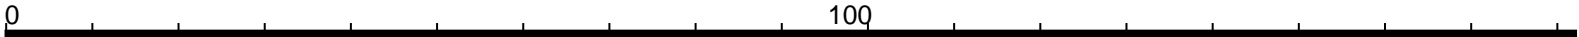

KBases BAC

Gaps in BAC

CT954312.5

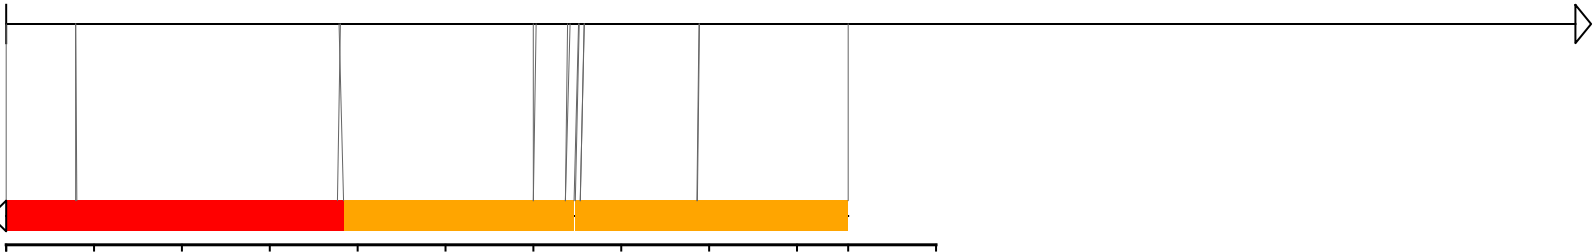

GL397606.1

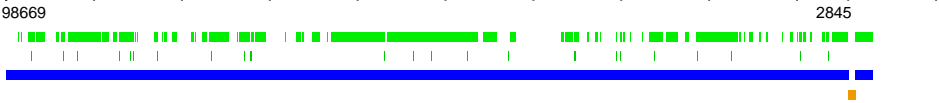

Rpts  
Tandem Rpts  
SDs  
Gaps

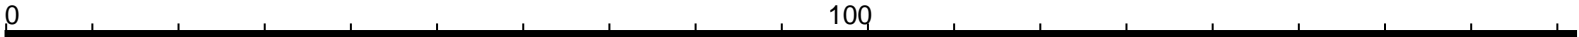

KBases BAC

Gaps in BAC

CT954312.5

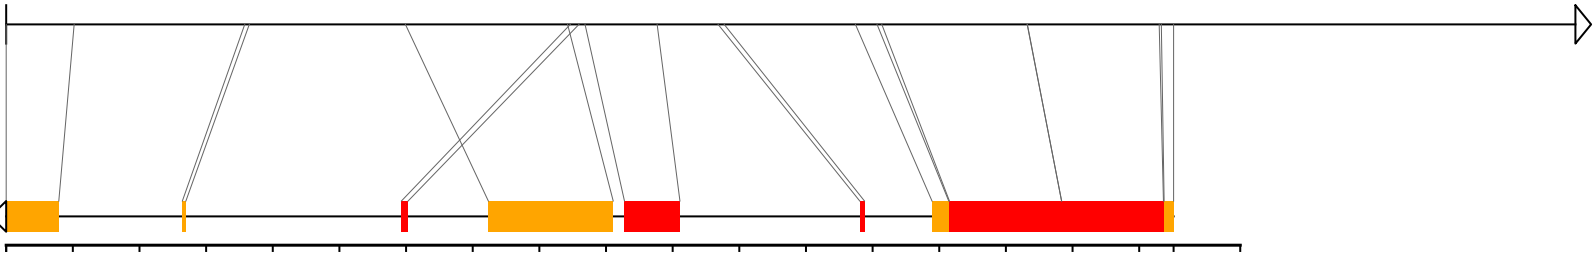

GL397514.1

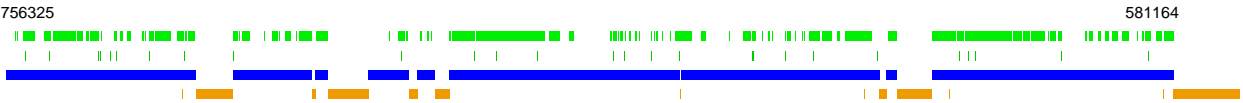

Rpts  
Tandem Rpts  
SDs  
Gaps

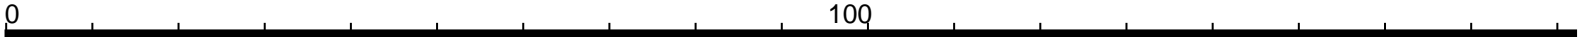

KBases BAC

Gaps in BAC

CT954312.5

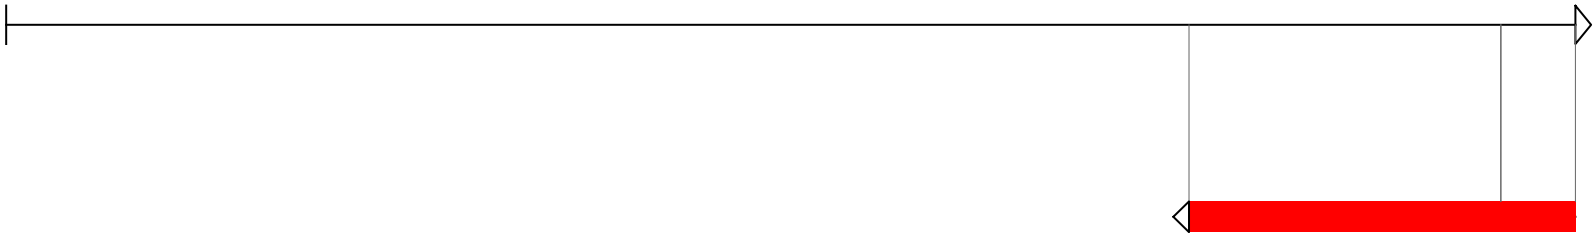

GL397566.1

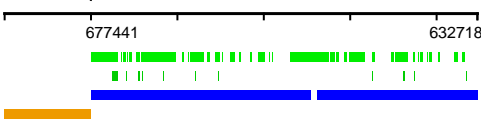

Rpts  
Tandem Rpts  
SDs  
Gaps

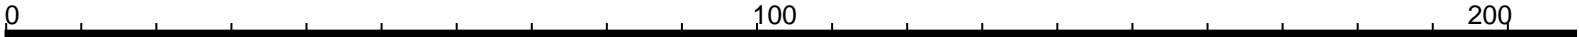

KBases BAC  
Gaps in BAC  
CT954313.6

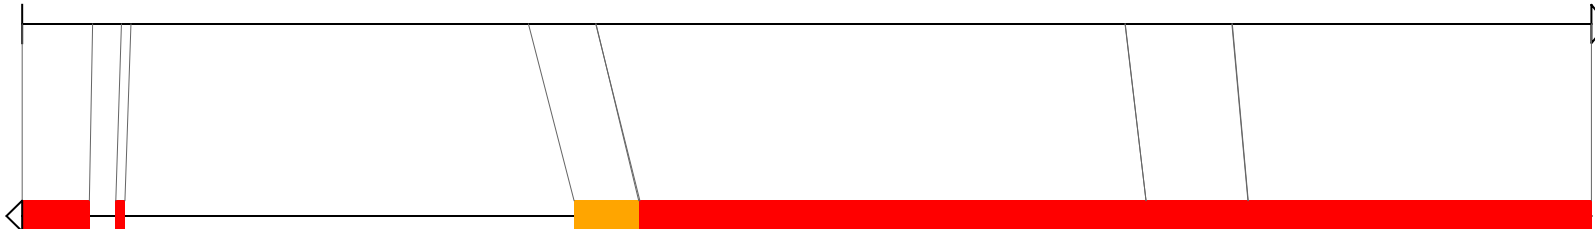

GL397431.1

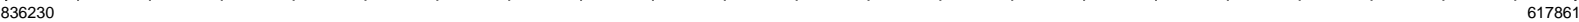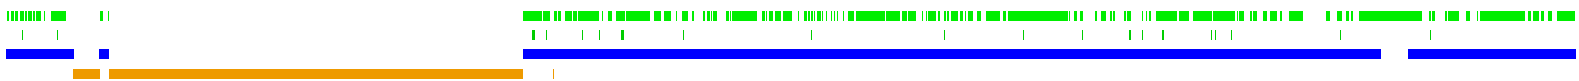

Rpts  
Tandem Rpts  
SDs  
Gaps

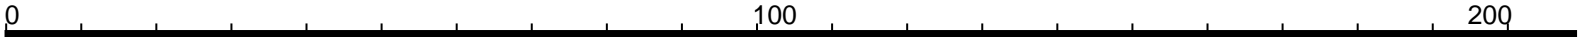

KBases BAC  
Gaps in BAC  
CT954313.6

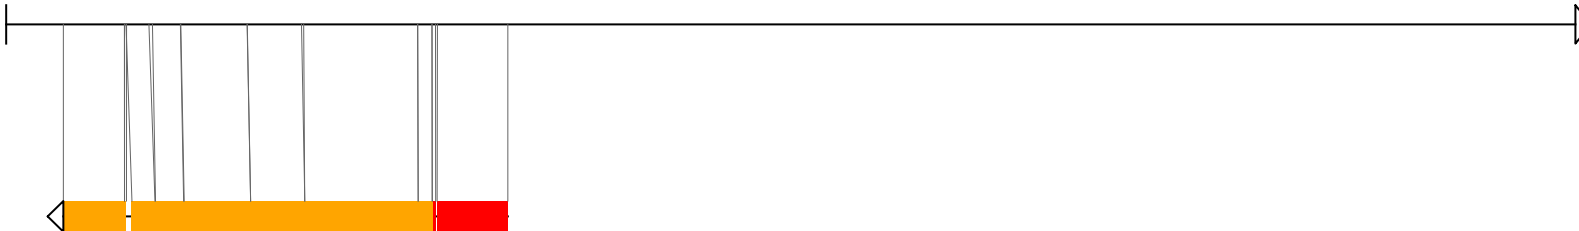

GL397431.1

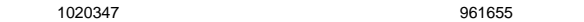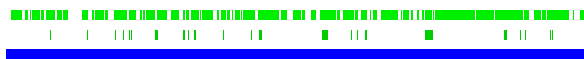

Rpts  
Tandem Rpts  
SDs  
Gaps

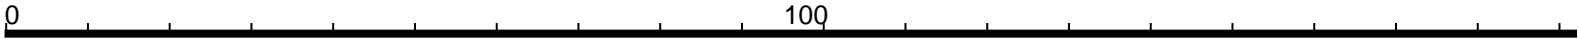

KBases BAC

Gaps in BAC

CT954318.8

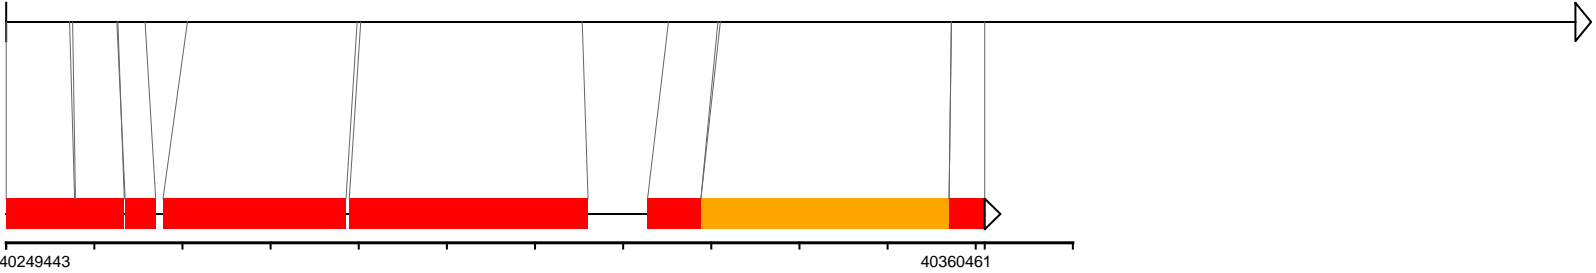

GL397274.1

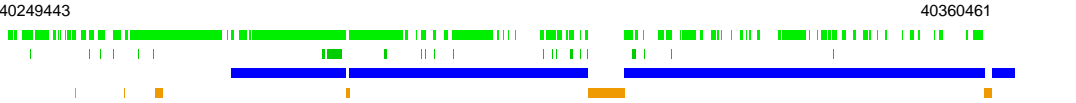

Rpts  
Tandem Rpts  
SDs  
Gaps

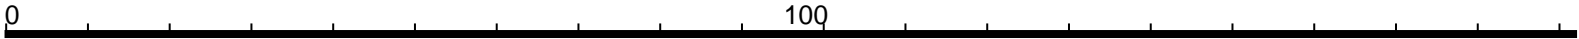

KBases BAC

Gaps in BAC

CT954318.8

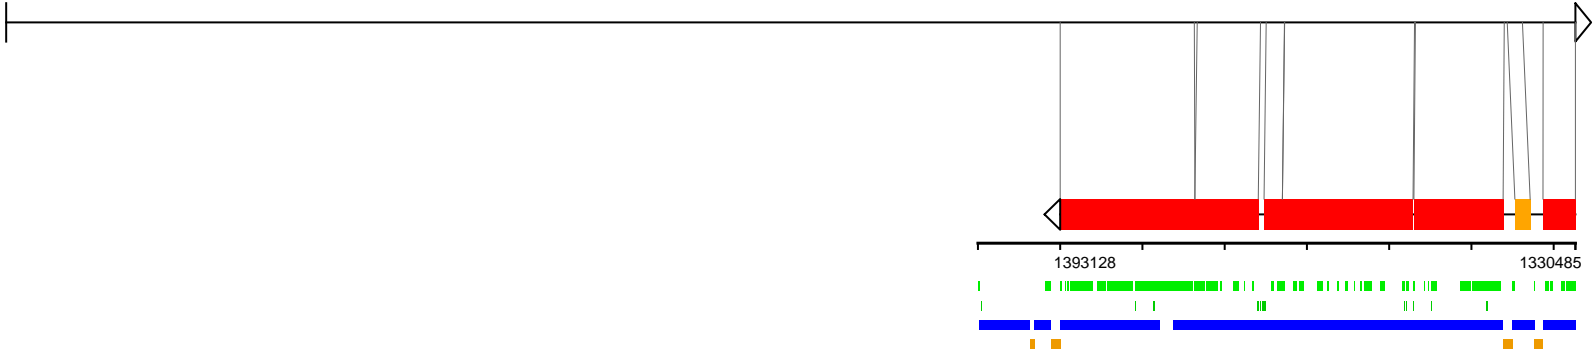

GL397501.1

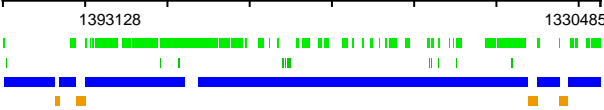

Rpts  
Tandem Rpts  
SDs  
Gaps

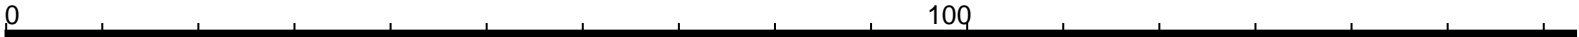

KBases BAC

Gaps in BAC

CT954320.5

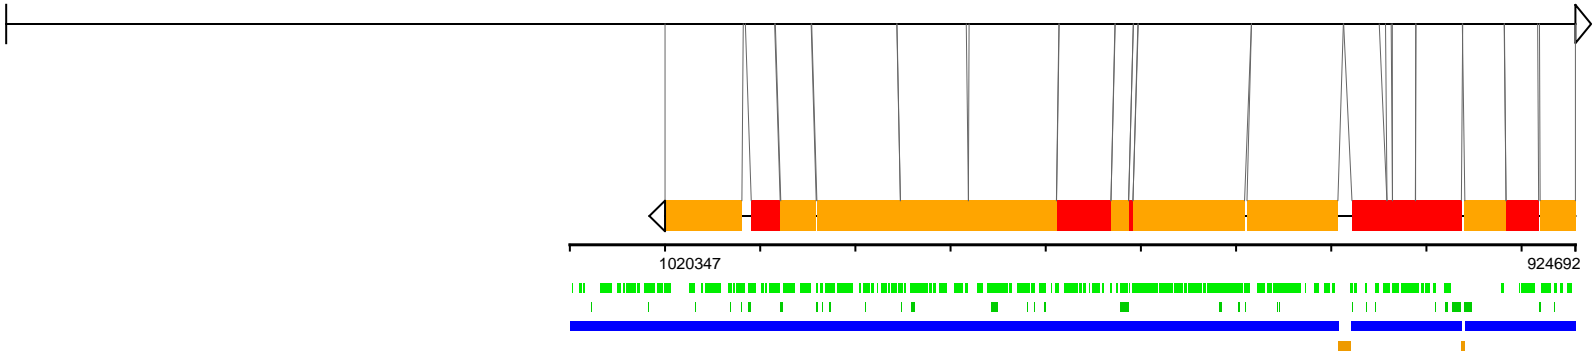

GL397431.1

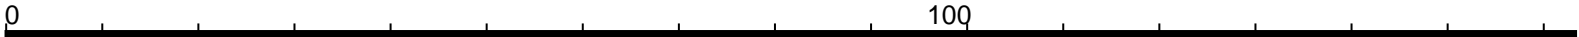

KBases BAC

Gaps in BAC

CT954320.5

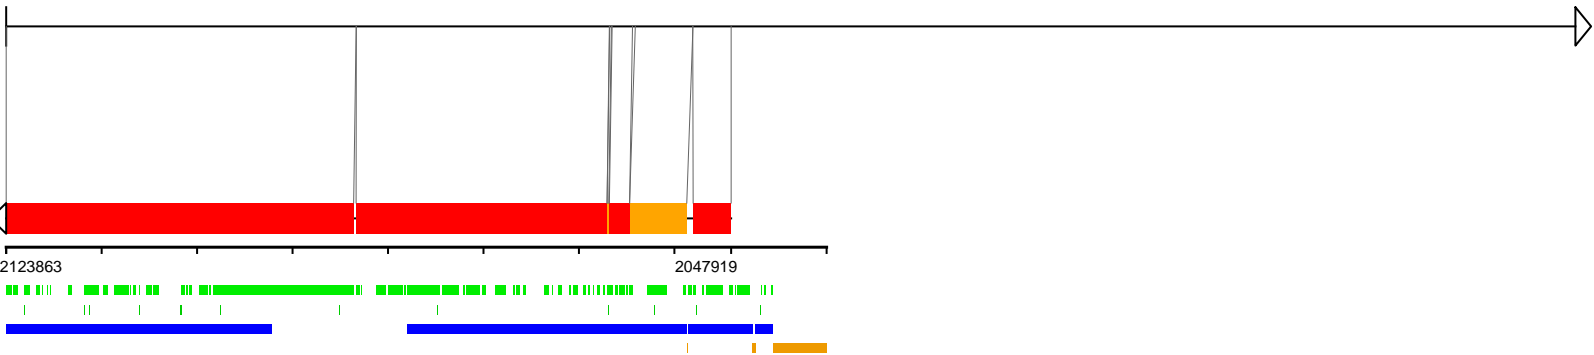

GL397336.1

Rpts

Tandem Rpts

SDs

Gaps

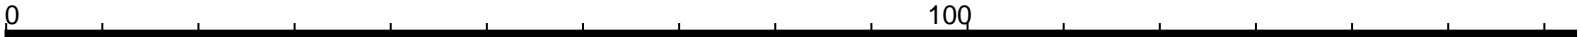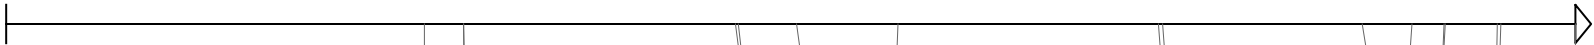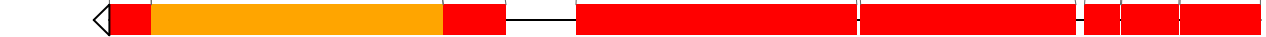

40360461

40249443

KBases BAC

Gaps in BAC

CT990551.3

GL397274.1

Rpts  
Tandem Rpts  
SDs  
Gaps

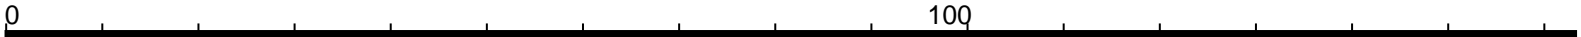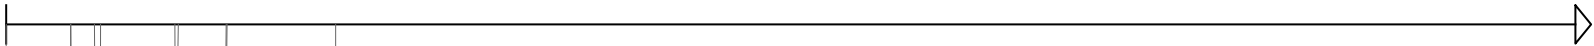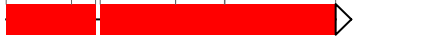

1359426

1393128

KBases BAC

Gaps in BAC

CT990551.3

GL397501.1

Rpts  
Tandem Rpts  
SDs  
Gaps

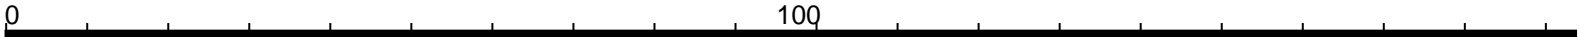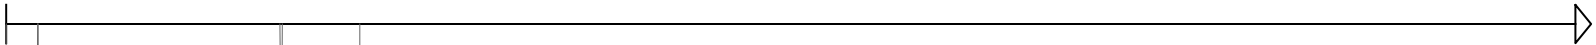

KBases BAC  
Gaps in BAC  
CT990555.8

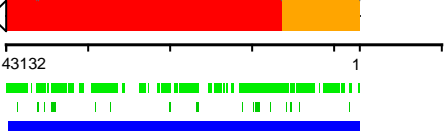

GL397348.1

Rpts  
Tandem Rpts  
SDs  
Gaps

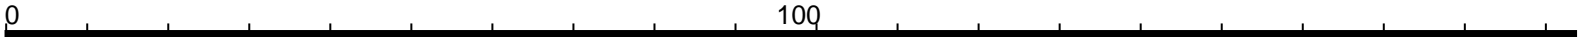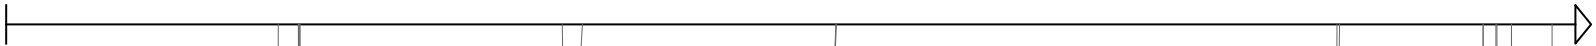

KBases BAC  
Gaps in BAC  
CT990555.8

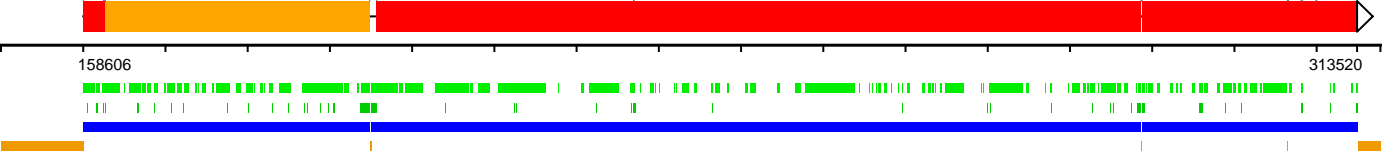

GL397566.1

Rpts  
Tandem Rpts  
SDs  
Gaps

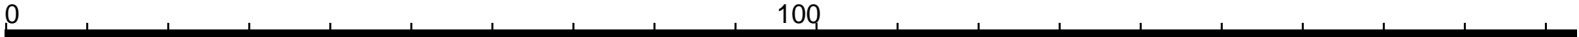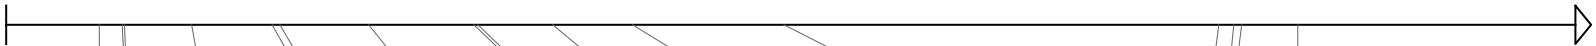

KBases BAC  
Gaps in BAC  
CT990555.8

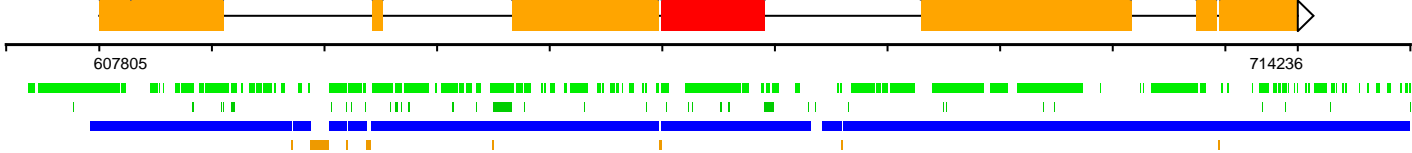

GL397501.1

Rpts  
Tandem Rpts  
SDs  
Gaps

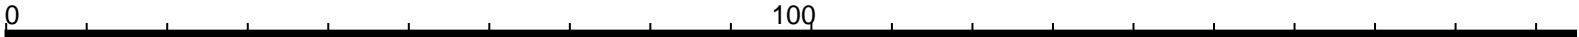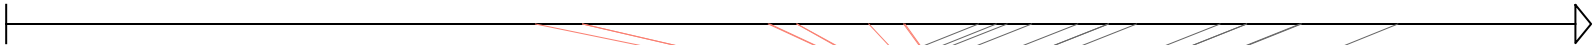

KBases BAC  
Gaps in BAC  
CT990556.8

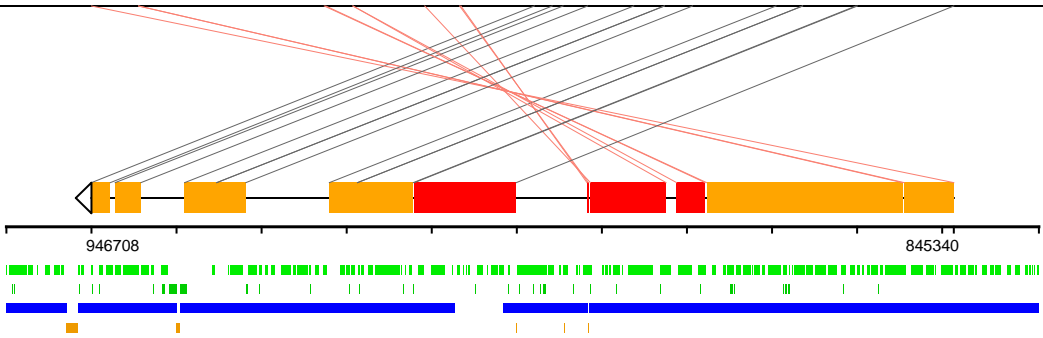

GL397431.1

Rpts  
Tandem Rpts  
SDs  
Gaps

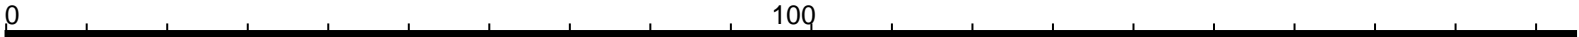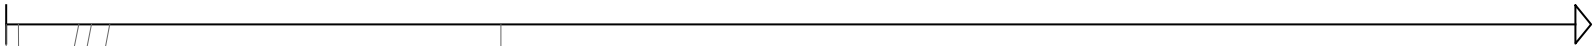

KBases BAC  
Gaps in BAC  
CT990556.8

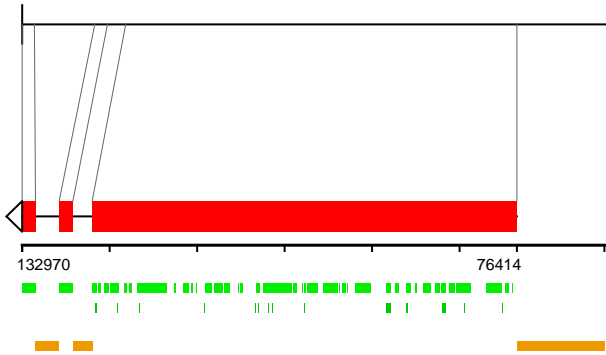

GL397323.1

Rpts  
Tandem Rpts  
SDs  
Gaps

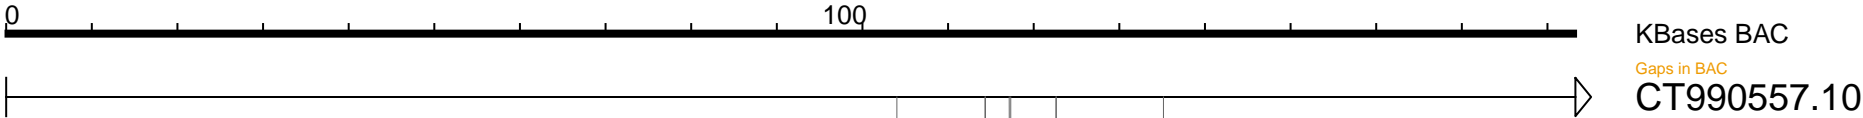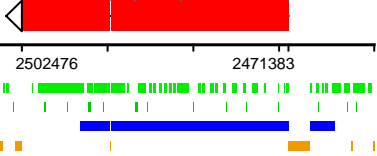

GL397399.1

Rpts  
Tandem Rpts  
SDs  
Gaps

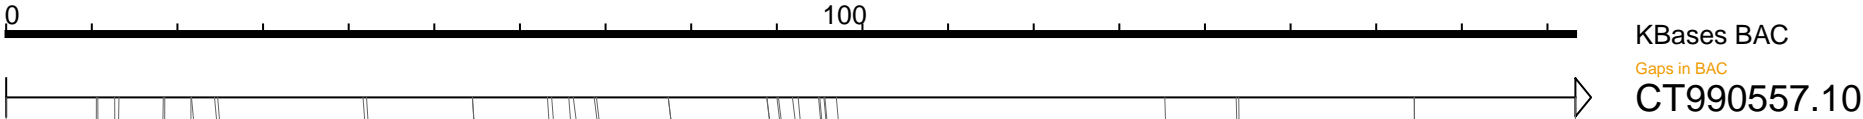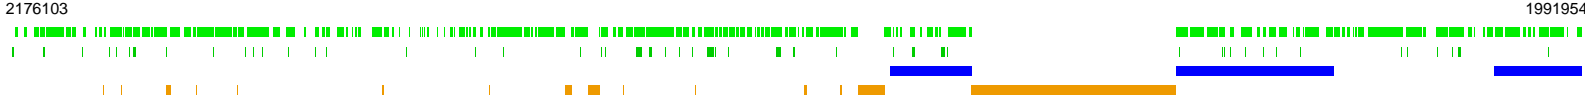

KBases BAC

CT990557.10

GL397457.1

Rpts  
Tandem Rpts  
SDs  
Gaps

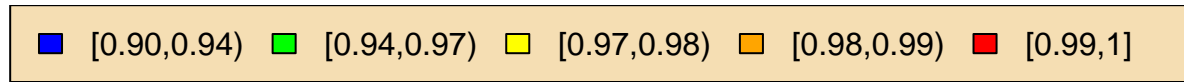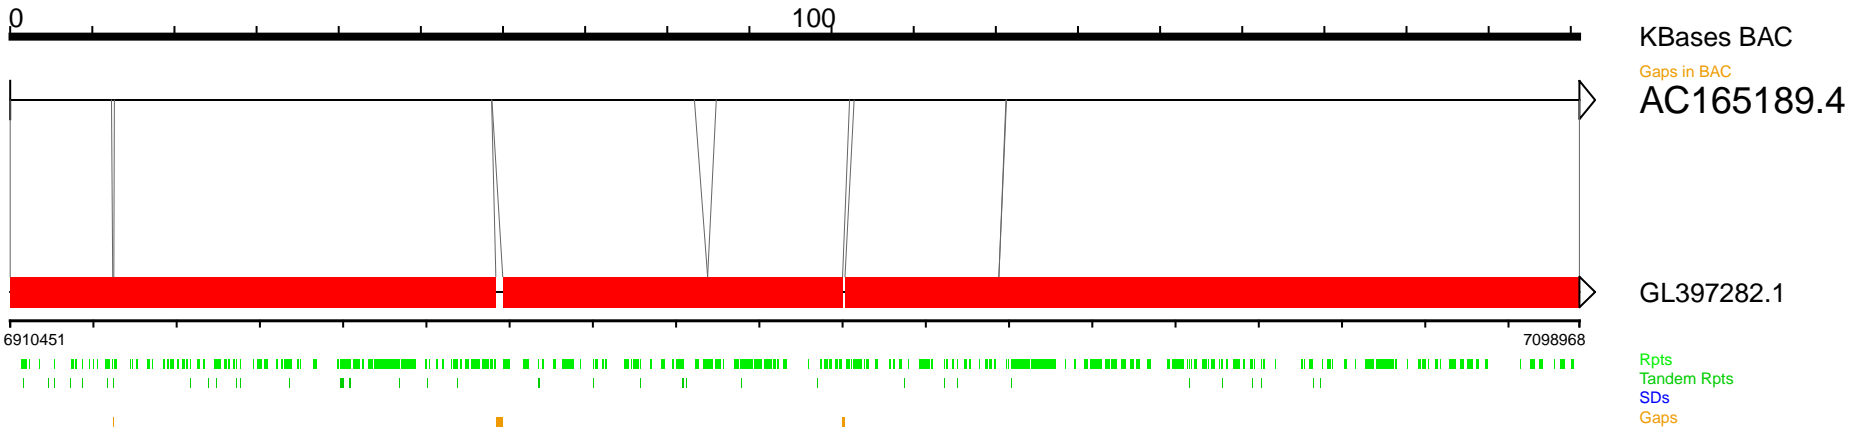

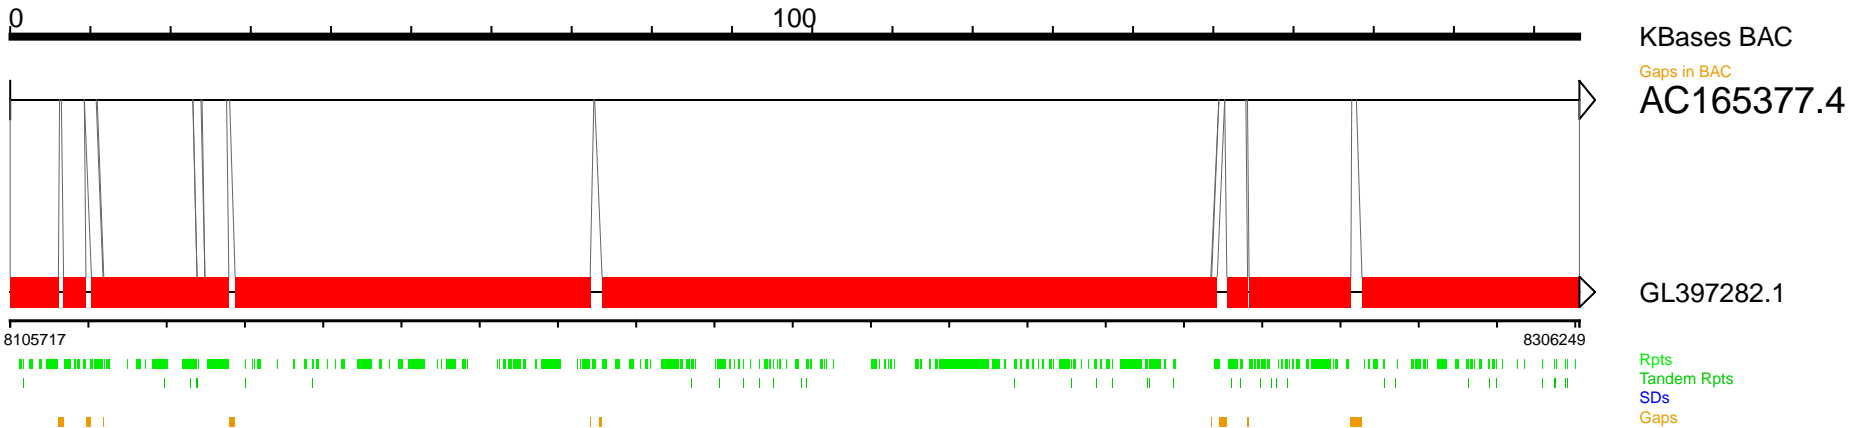

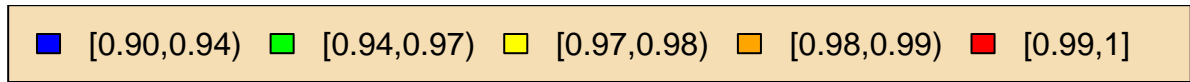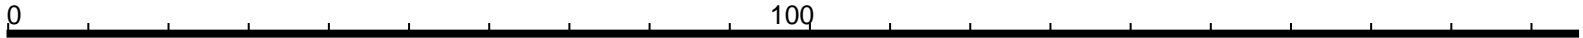

KBases BAC

Gaps in BAC

AC166002.3

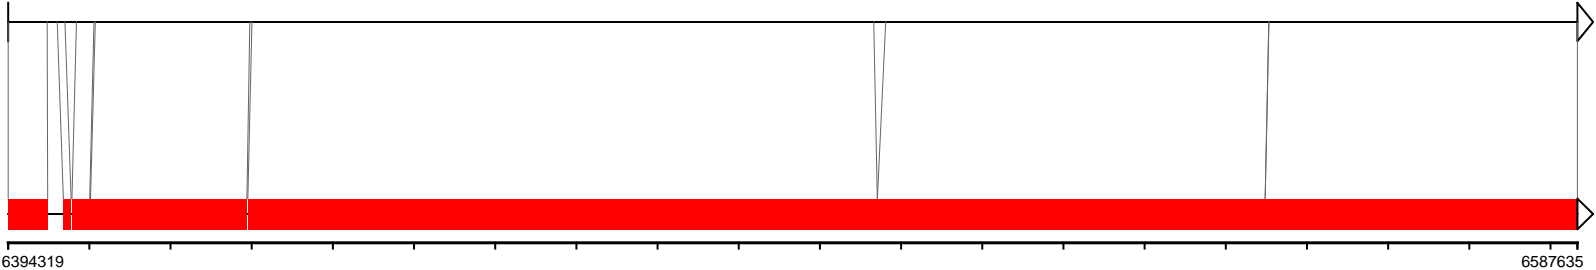

GL397282.1

Rpts  
Tandem Rpts  
SDs  
Gaps

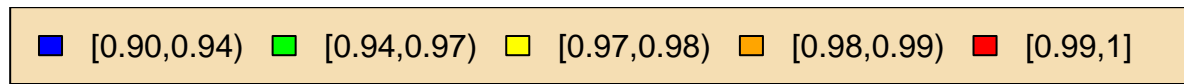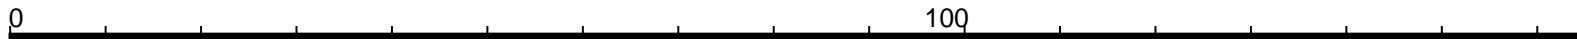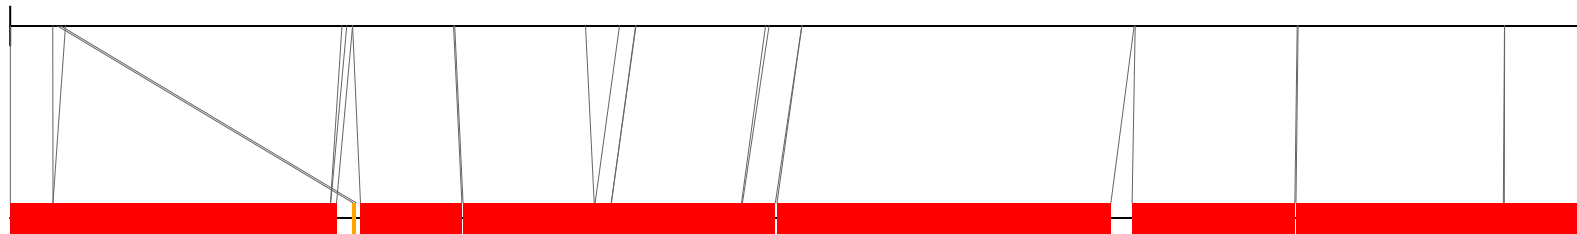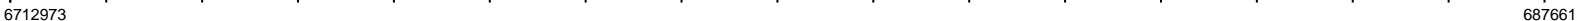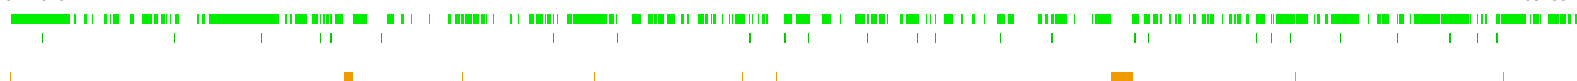

KBases BAC  
AC166003.3

GL397282.1

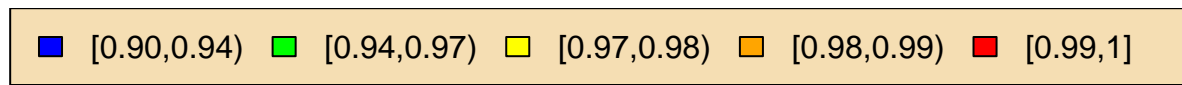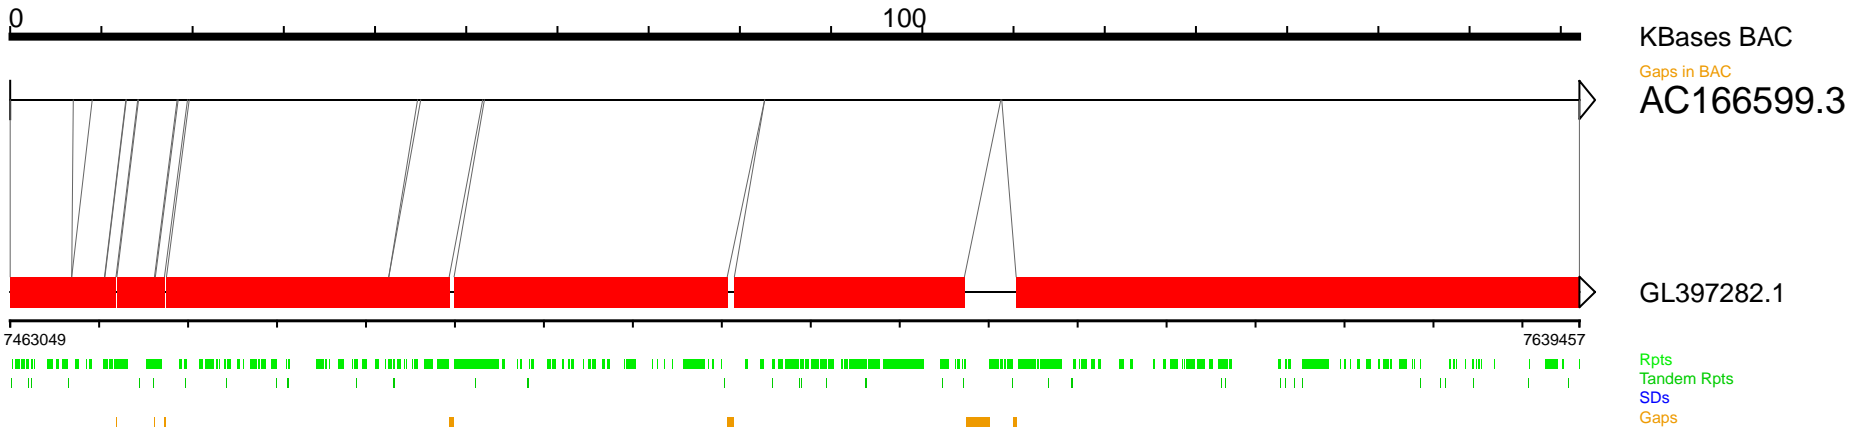

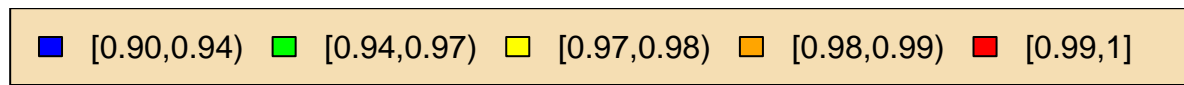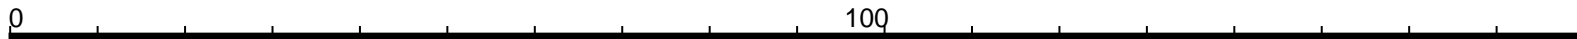

KBases BAC

Gaps in BAC

AC166600.4

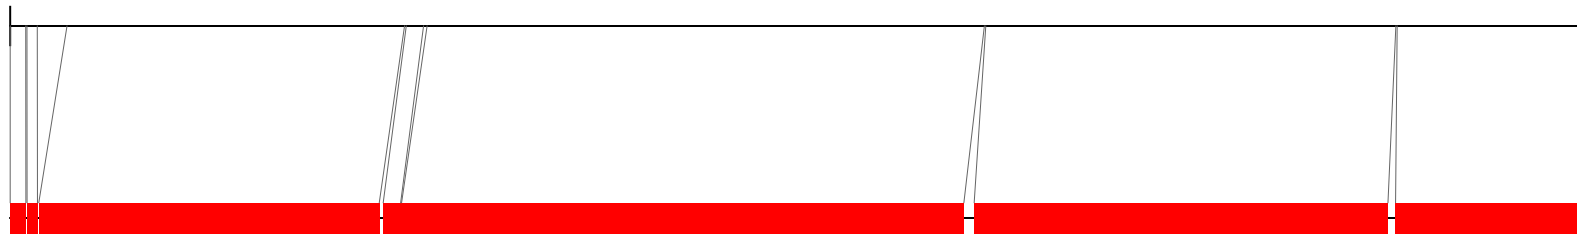

GL397282.1

7855899 8033757

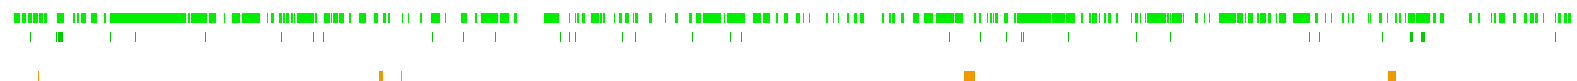

Rpts  
Tandem Rpts  
SDs  
Gaps

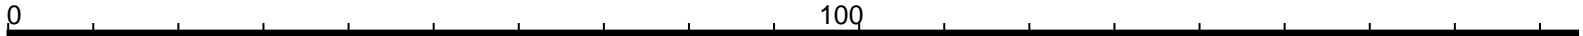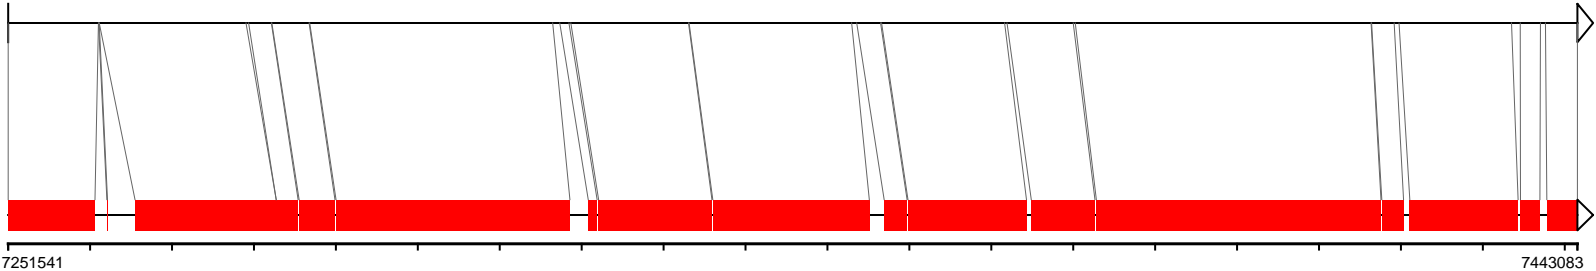

KBases BAC

Gaps in BAC

AC166601.4

GL397282.1

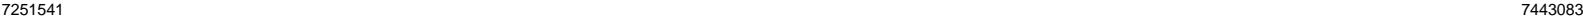

Rpts

Tandem Rpts

SDs

Gaps

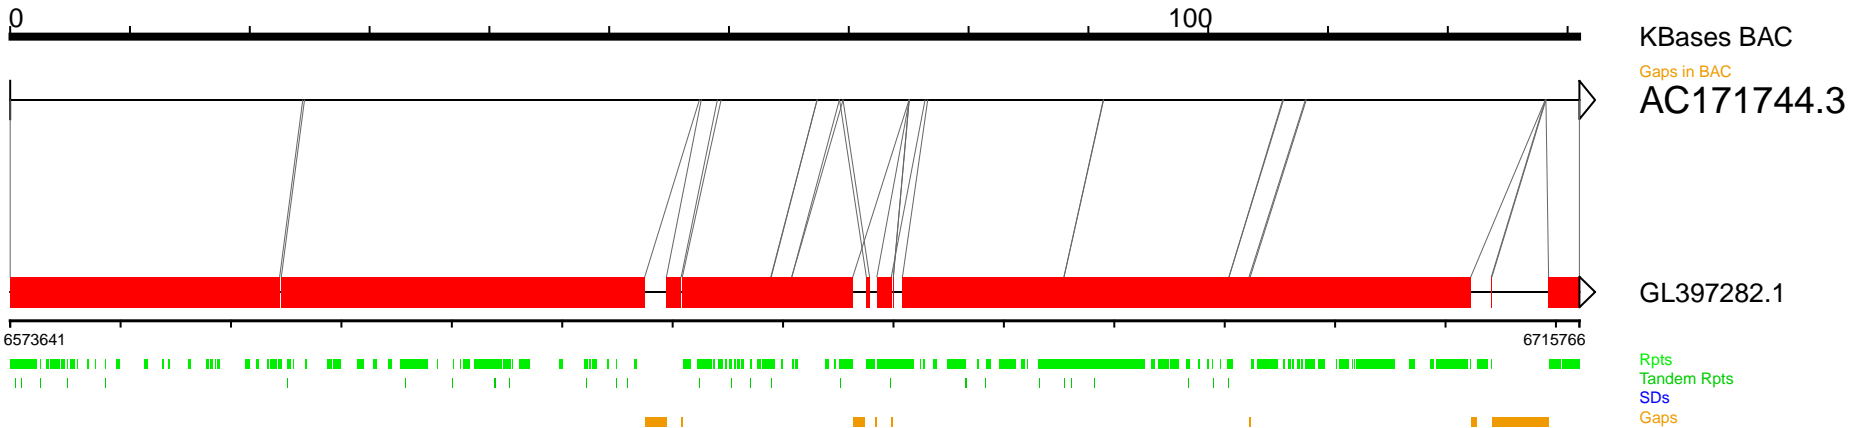

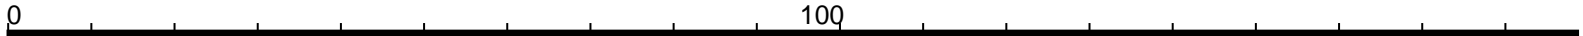

KBases BAC

Gaps in BAC

AC173914.3

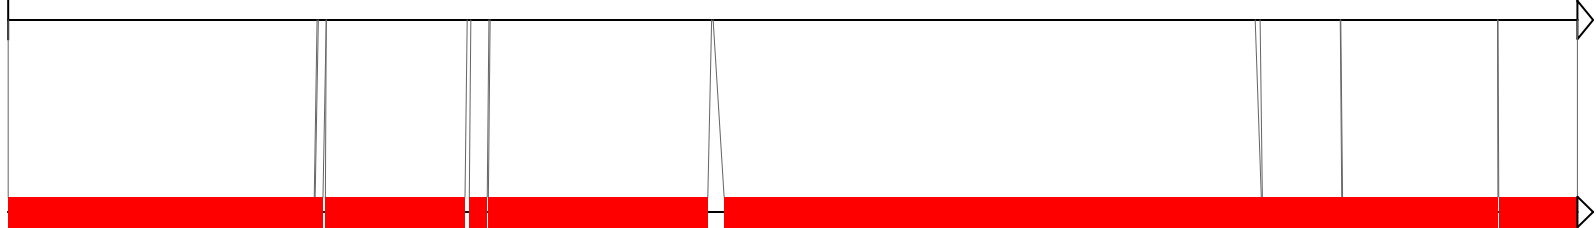

GL397282.1

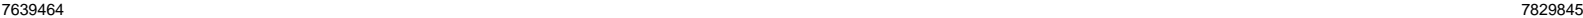

Rpts  
Tandem Rpts  
SDs  
Gaps

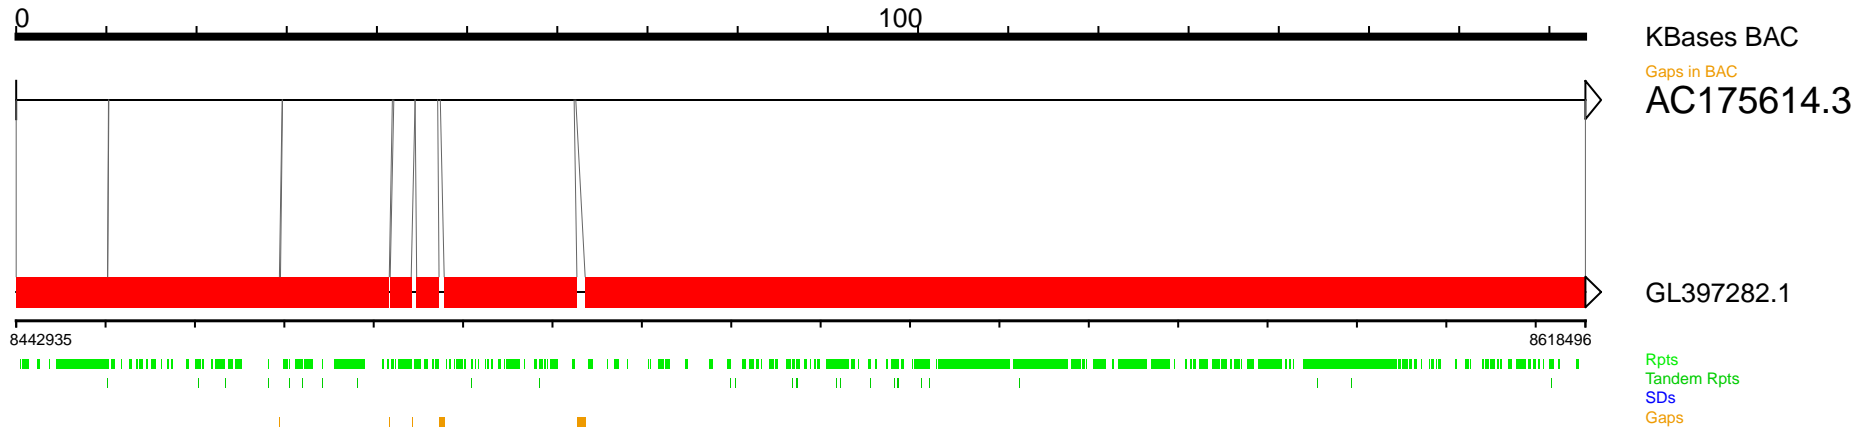

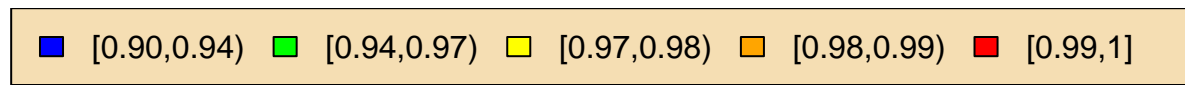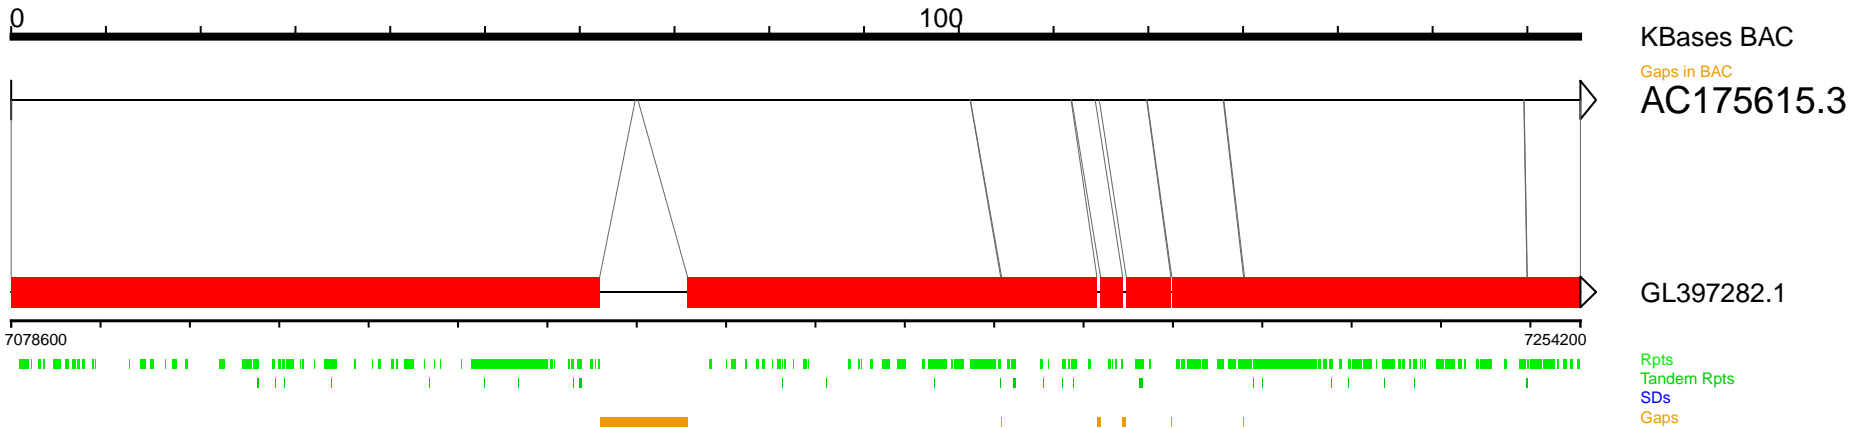

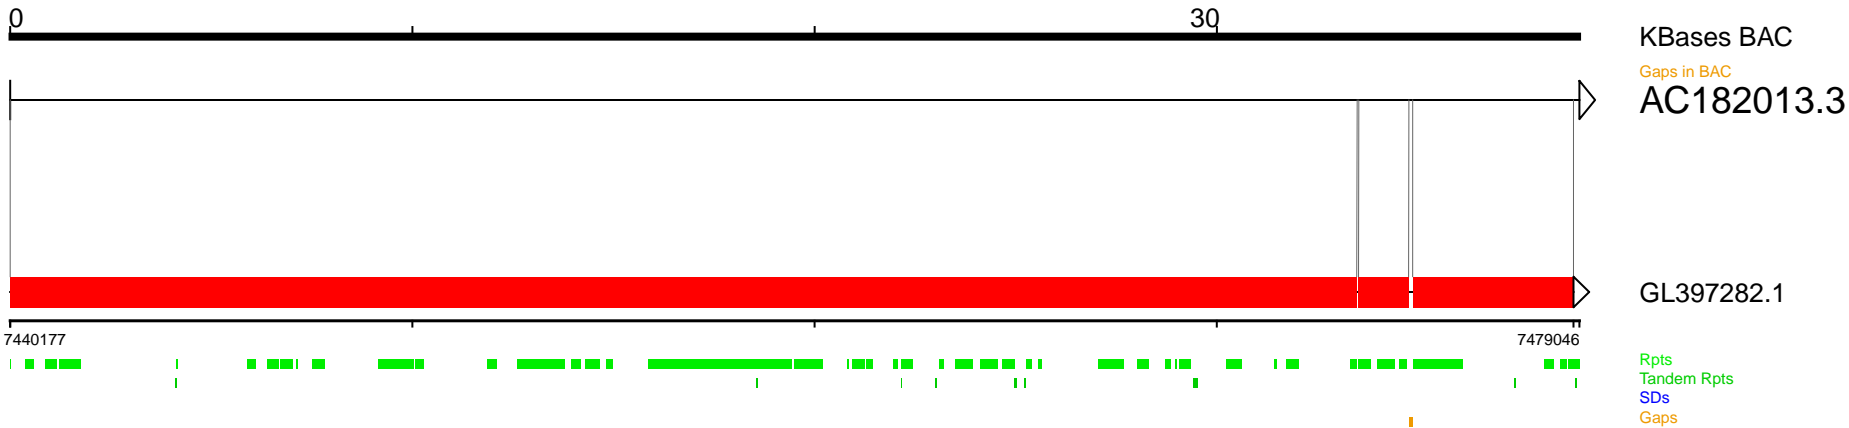

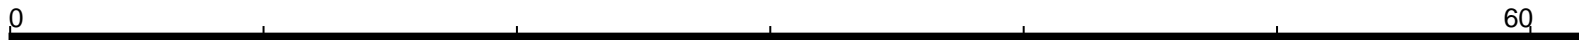

KBases BAC

Gaps in BAC

AC183705.4

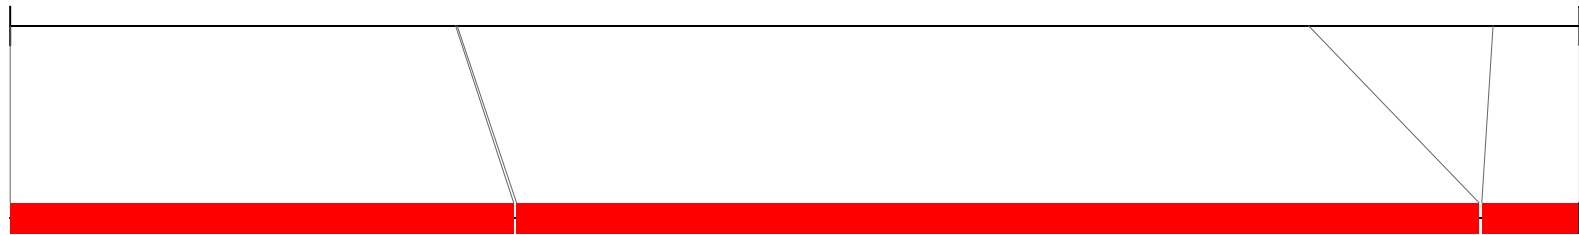

GL397282.1

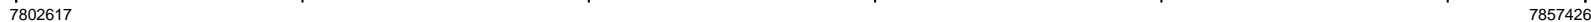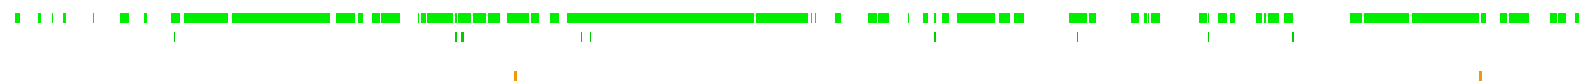

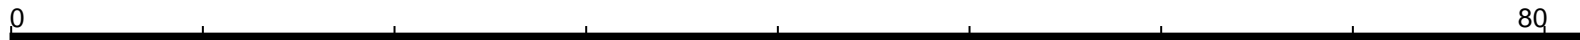

KBases BAC

Gaps in BAC

AC183847.3

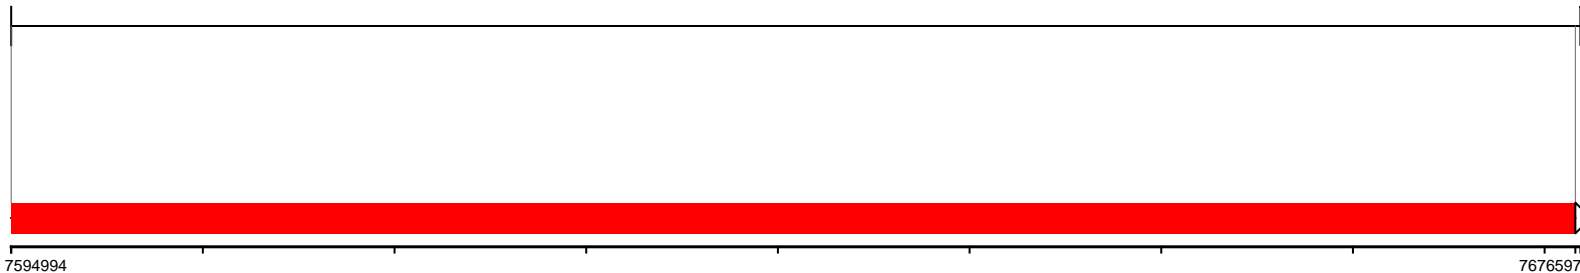

GL397282.1

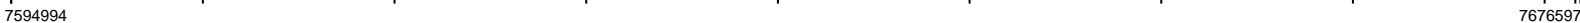

Rpts  
Tandem Rpts  
SDs  
Gaps

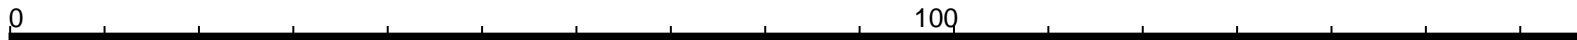

KBases BAC

Gaps in BAC

AC185380.3

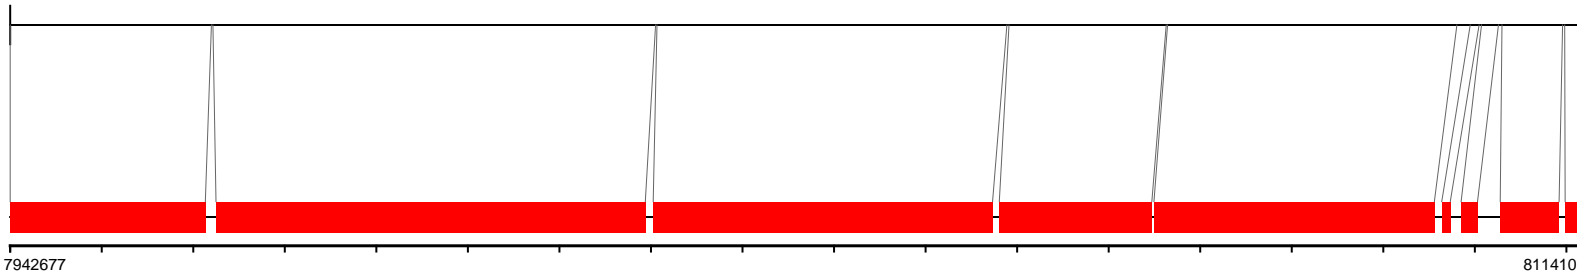

GL397282.1

Rpts  
Tandem Rpts  
SDs  
Gaps

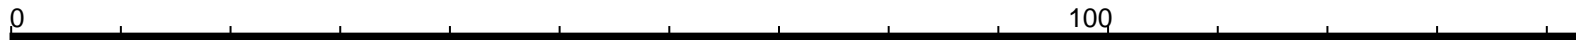

KBases BAC

Gaps in BAC

AC187424.3

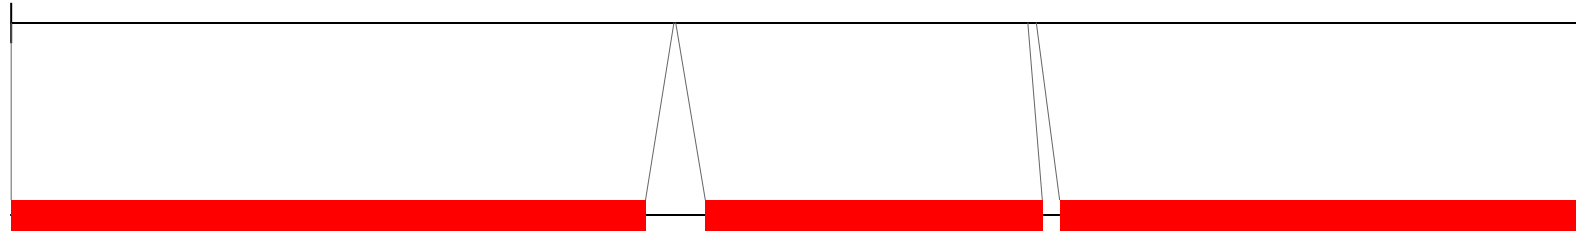

GL397282.1

8302772 8452191

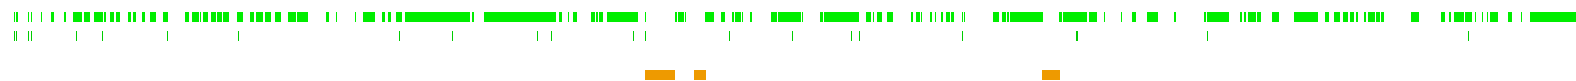

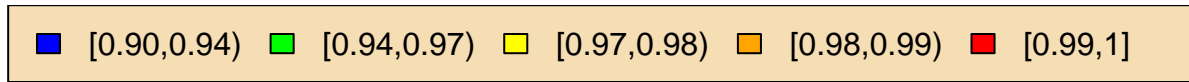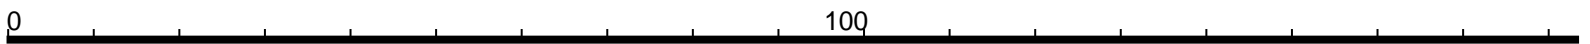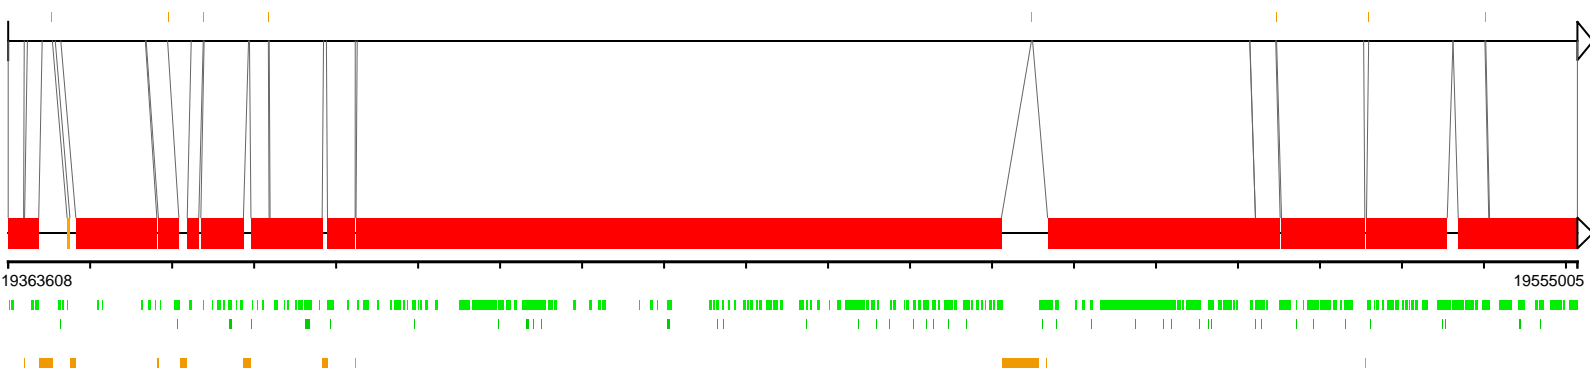

KBases BAC  
AC190007.2

GL397293.1

Rpts  
Tandem Rpts  
SDs  
Gaps

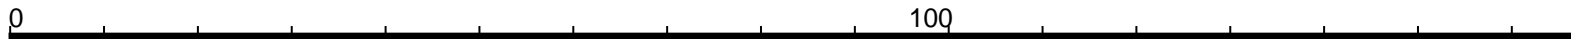

KBases BAC

Gaps in BAC

AC198096.2

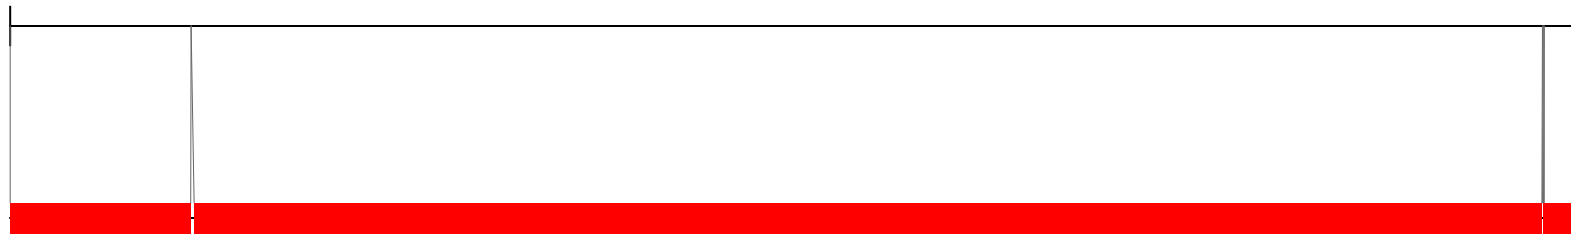

GL397276.1

36016723

36184253

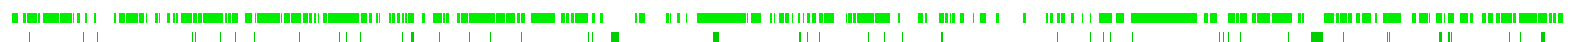

Rpts

Tandem Rpts

SDs

Gaps

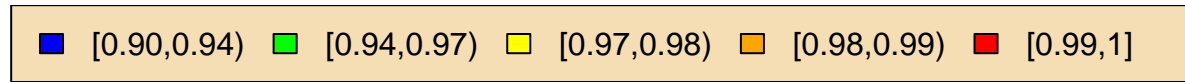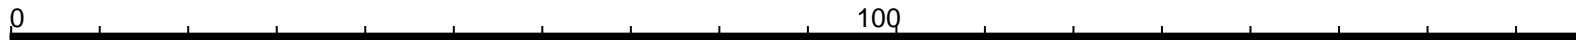

KBases BAC

Gaps in BAC

AC198097.2

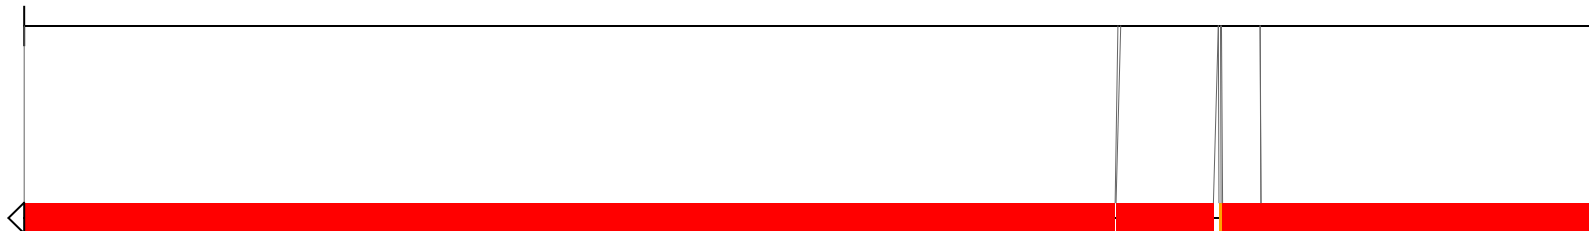

GL397370.1

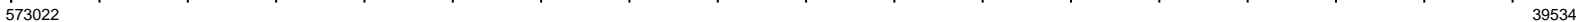

Rpts  
Tandem Rpts  
SDs  
Gaps

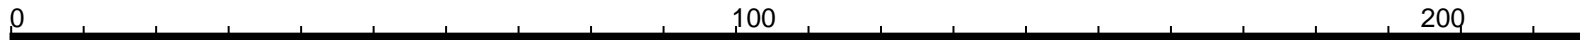

KBases BAC

Gaps in BAC

AC198098.1

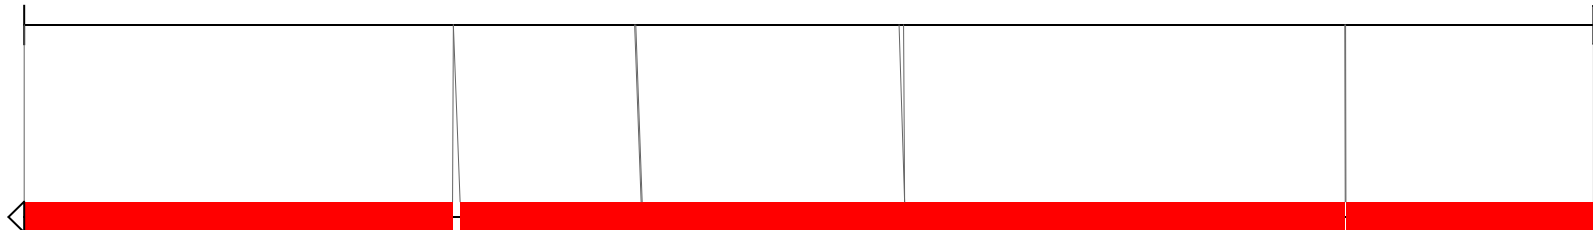

GL397528.1

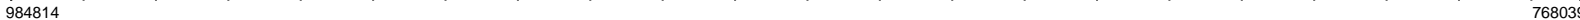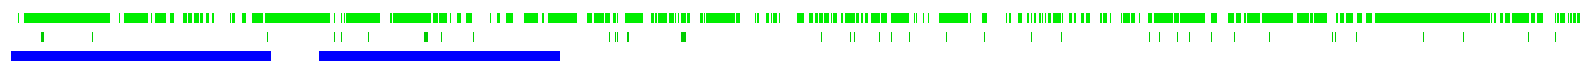

Rpts  
Tandem Rpts  
SDs  
Gaps

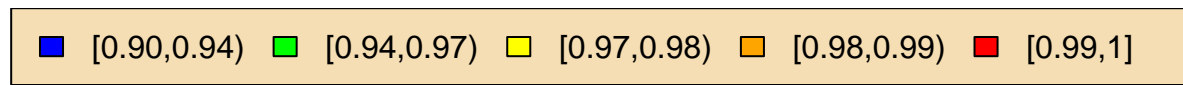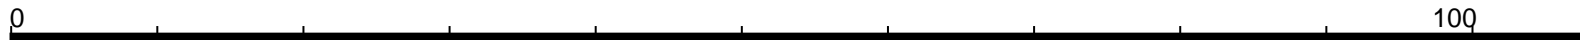

KBases BAC

Gaps in BAC

AC198099.1

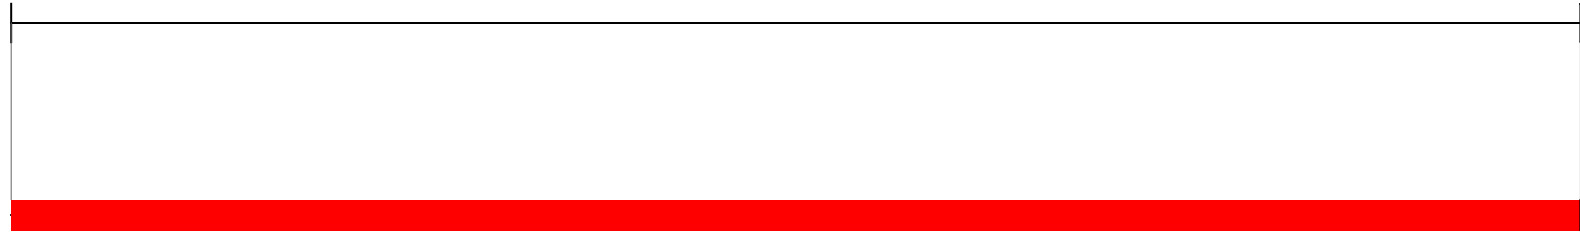

GL397261.1

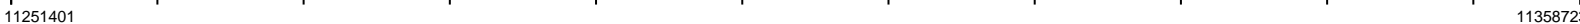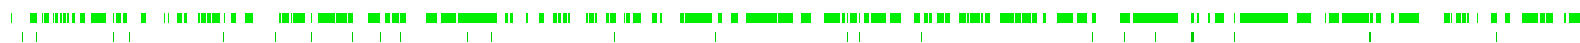

Rpts  
Tandem Rpts  
SDs  
Gaps

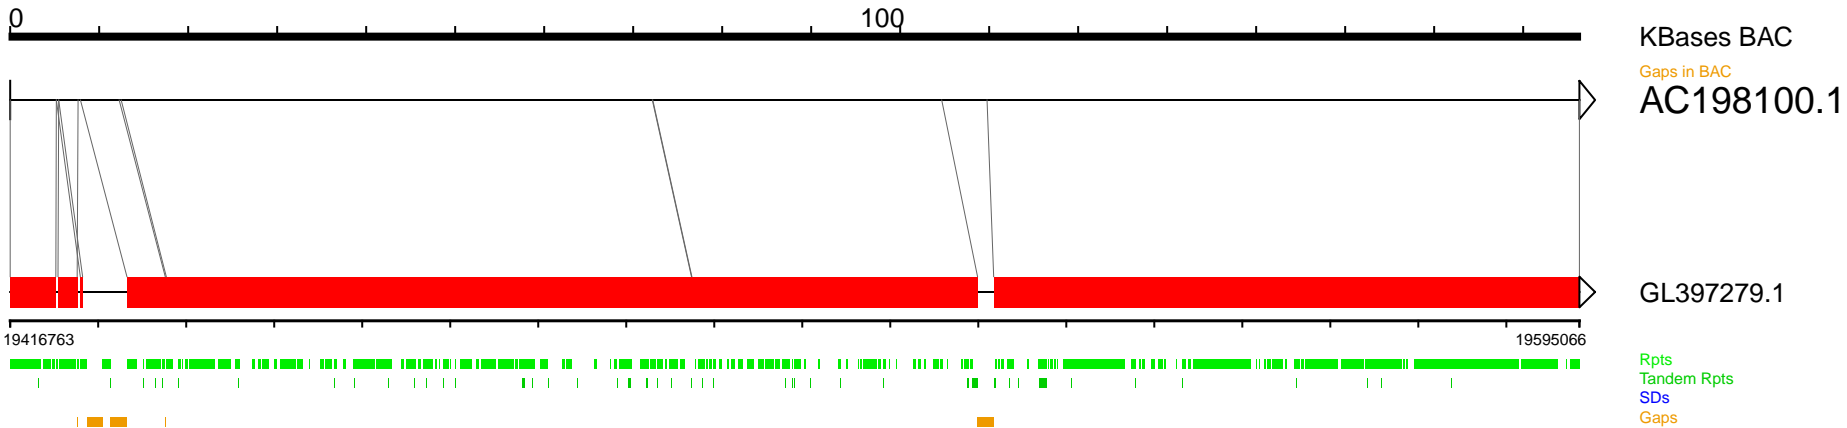

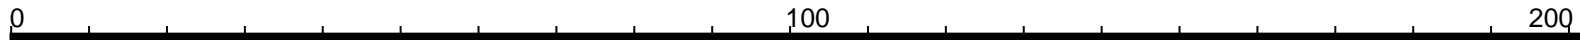

Kbases BAC

Gaps in BAC

AC198101.2

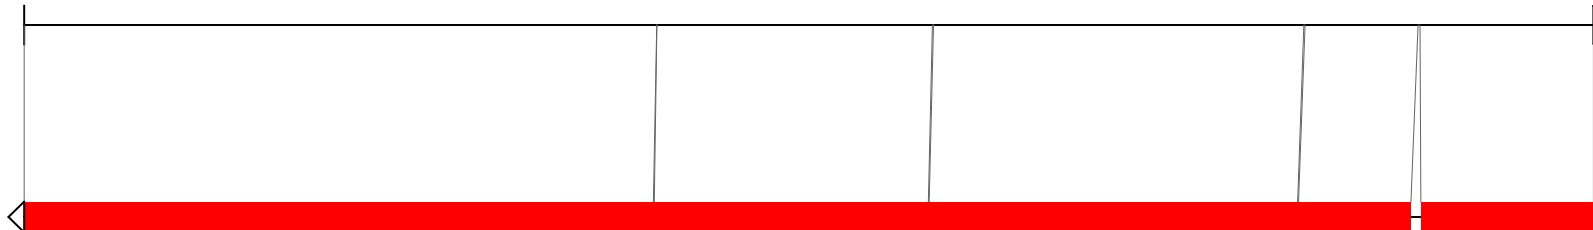

GL397267.1

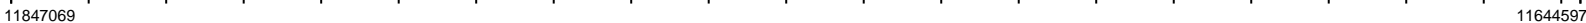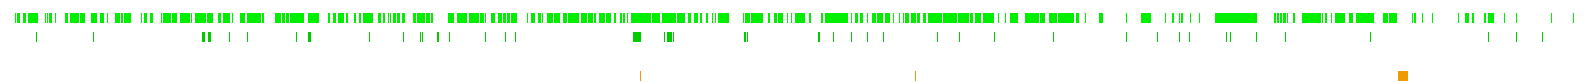

Rpts  
Tandem Rpts  
SDs  
Gaps

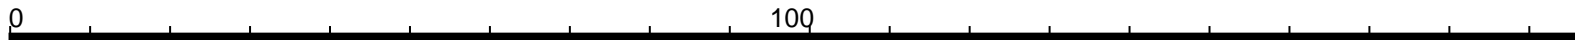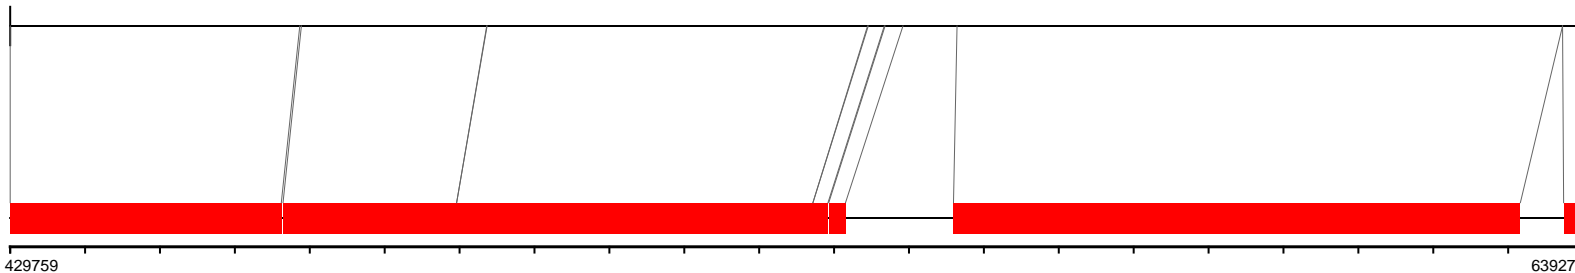

KBases BAC  
Gaps in BAC  
AC198102.2

GL397305.1

Rpts  
Tandem Rpts  
SDs  
Gaps

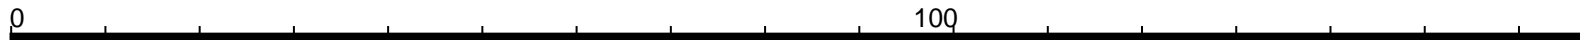

Kbases BAC

Gaps in BAC

AC198103.2

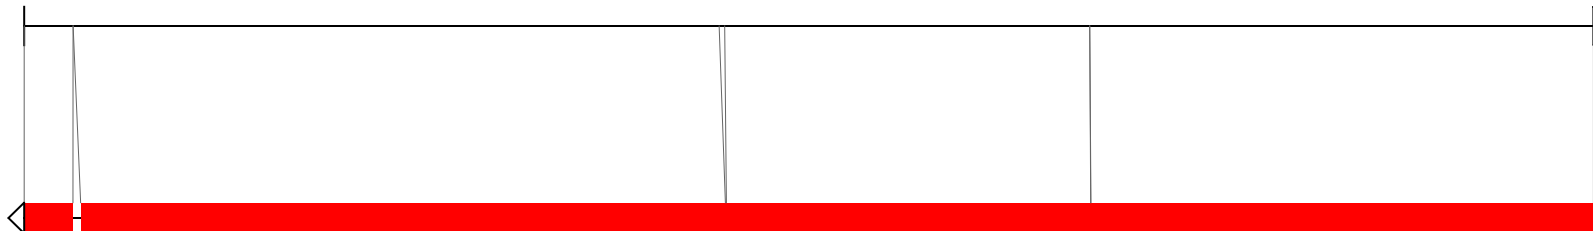

GL397263.1

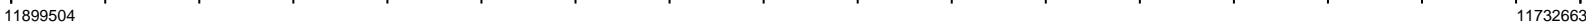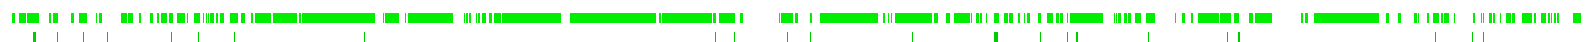

Rpts  
Tandem Rpts

SDs

Gaps

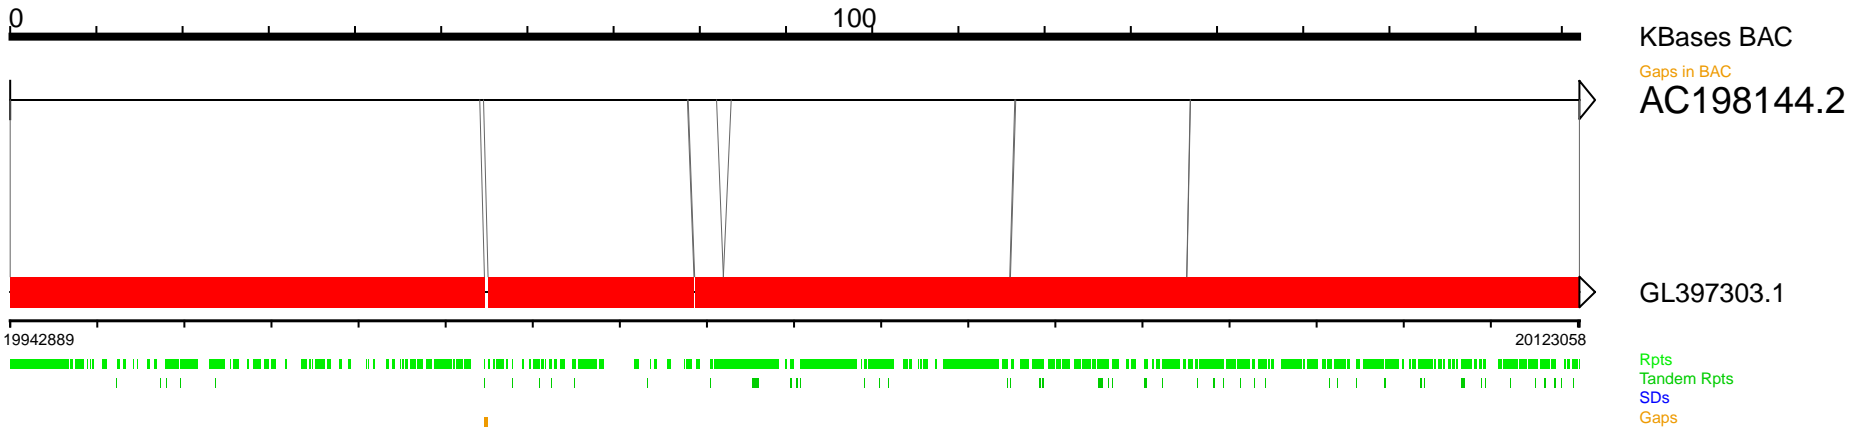

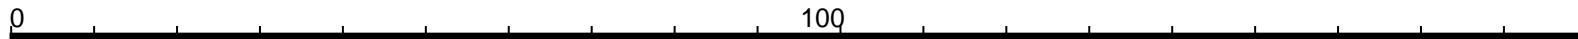

Kbases BAC

Gaps in BAC

AC198146.2

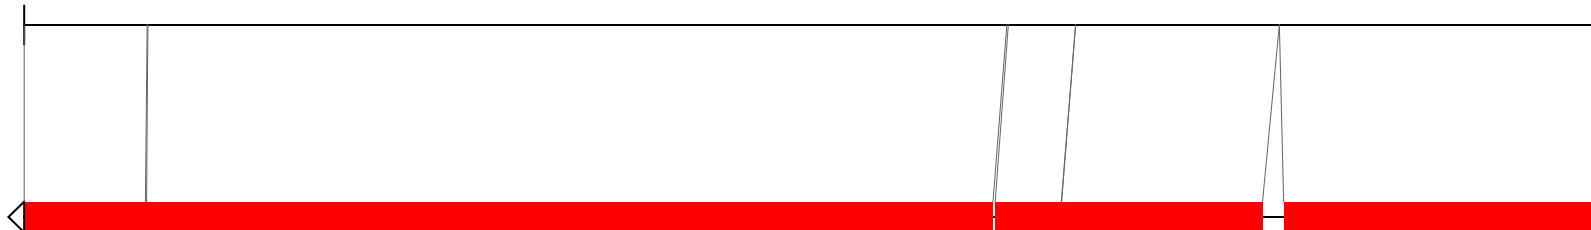

GL397300.1

1814749 1622826

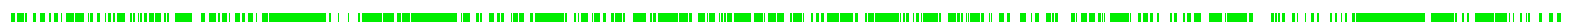

Rpts  
Tandem Rpts  
SDs  
Gaps

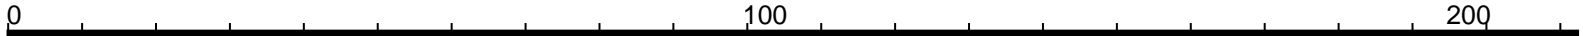

Kbases BAC

Gaps in BAC

AC198147.2

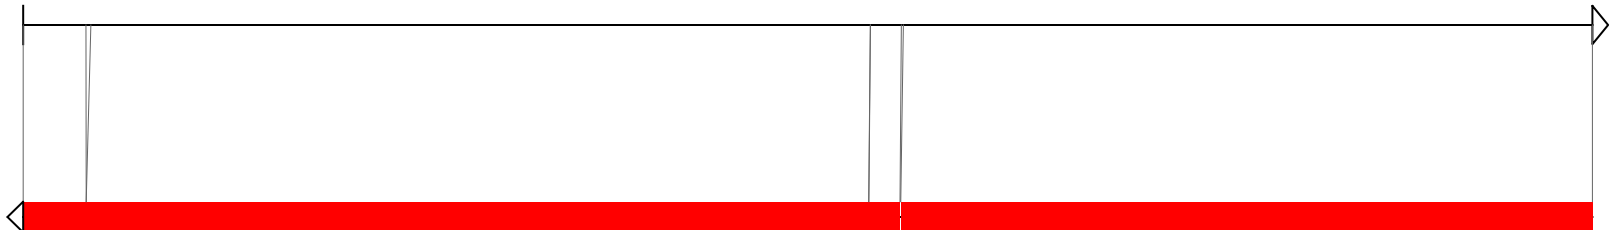

GL397352.1

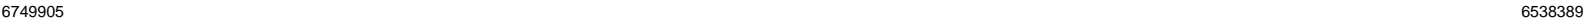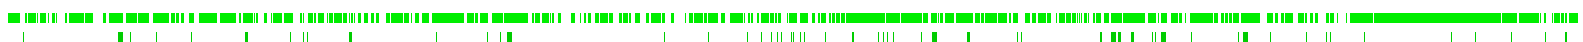

Rpts  
Tandem Rpts  
SDs  
Gaps

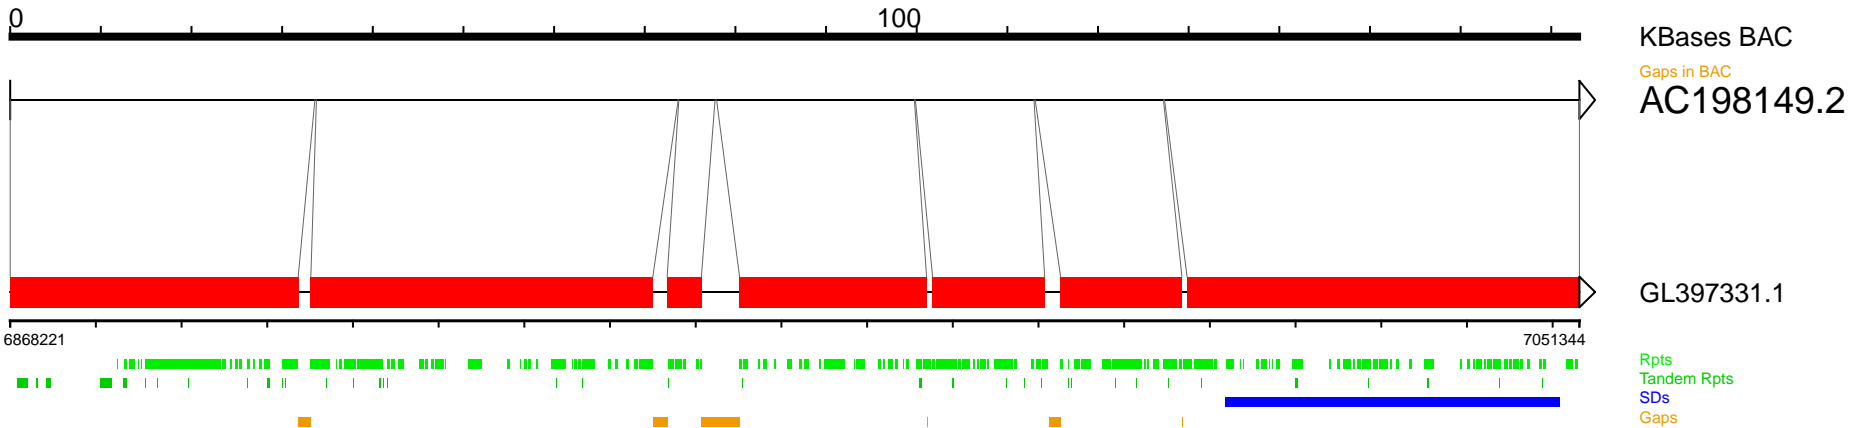

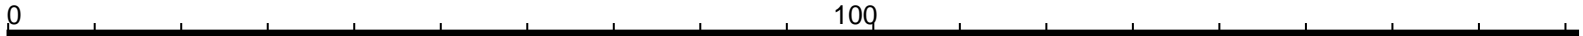

Kbases BAC

Gaps in BAC

AC198150.2

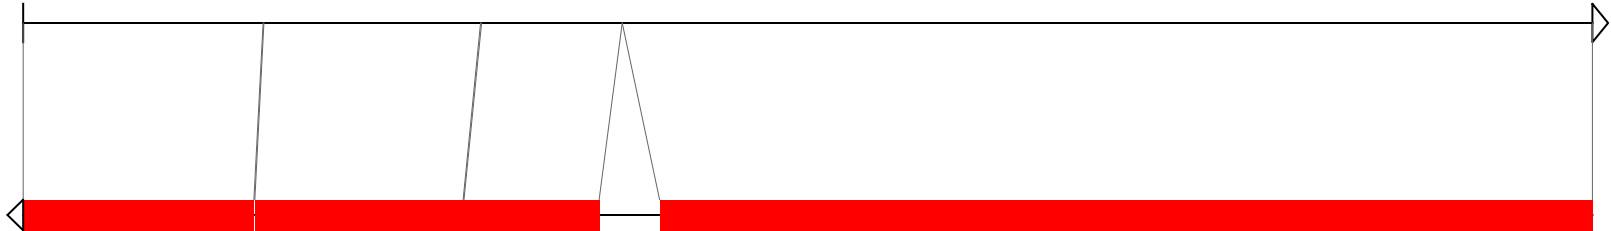

GL397280.1

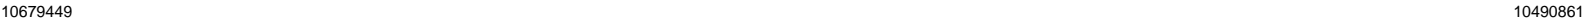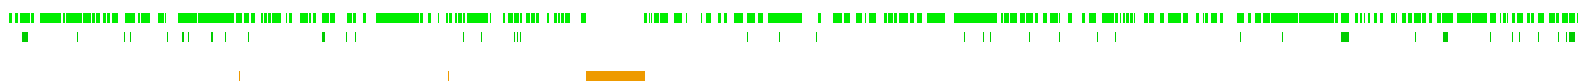

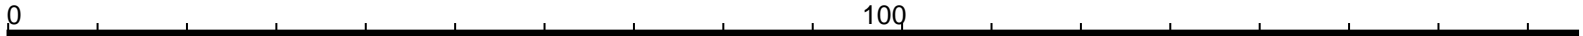

KBases BAC

Gaps in BAC

AC198151.2

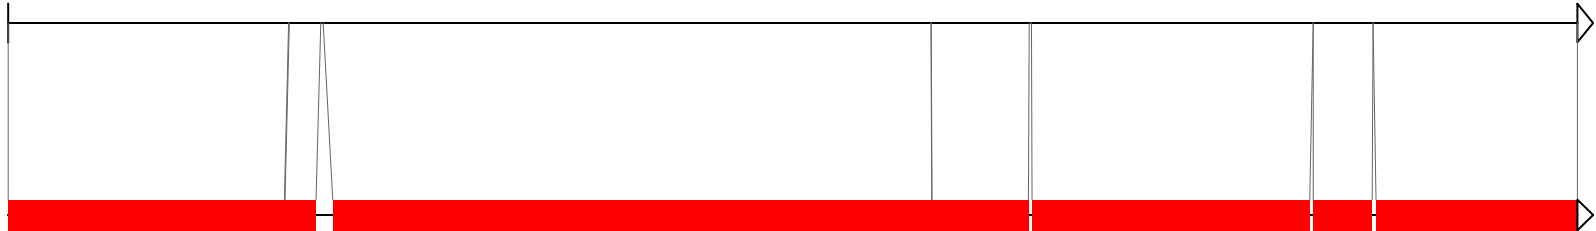

GL397265.1

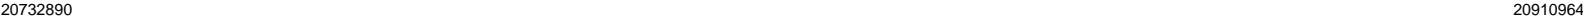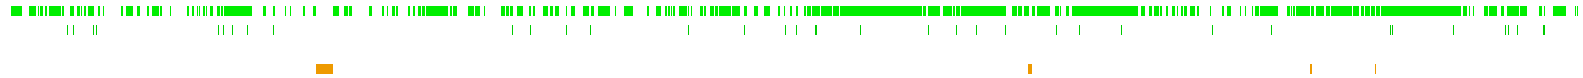

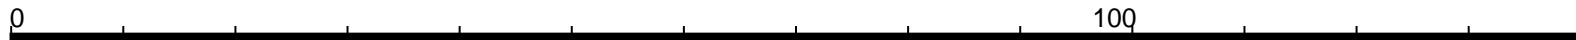

KBases BAC

Gaps in BAC

AC198152.2

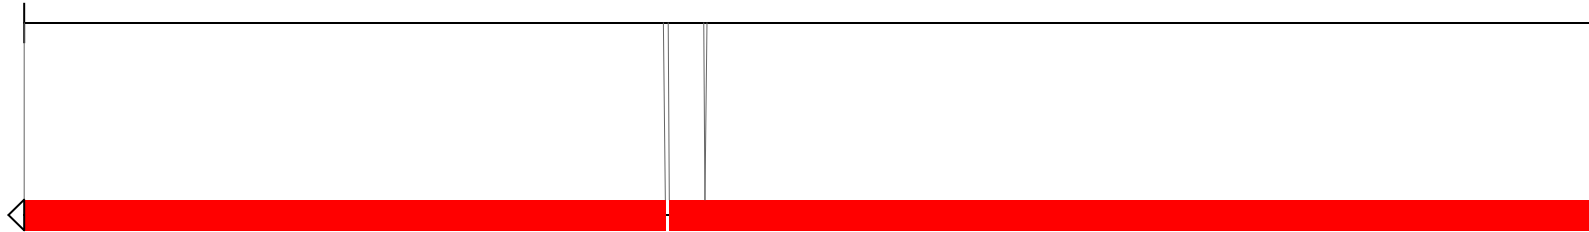

GL397275.1

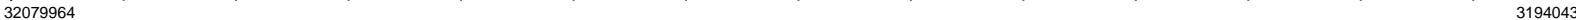

Rpts  
Tandem Rpts  
SDs  
Gaps

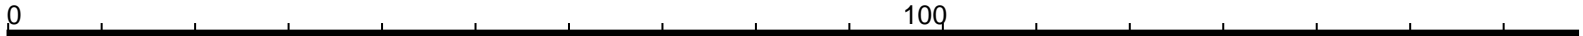

KBases BAC

Gaps in BAC

AC198153.2

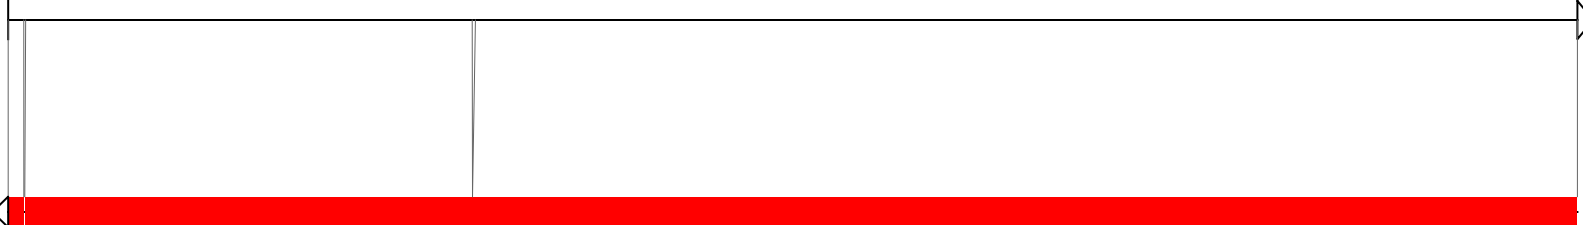

GL397319.1

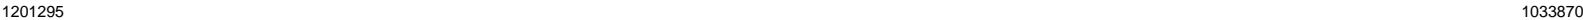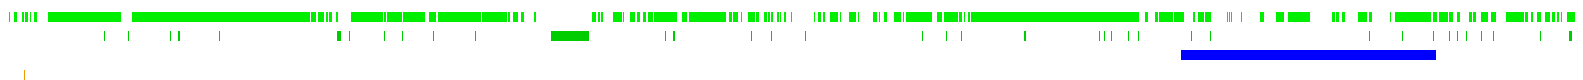

Rpts  
Tandem Rpts  
SDs  
Gaps

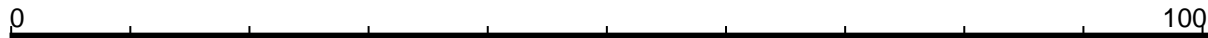

KBases BAC

Gaps in BAC

AC198154.2

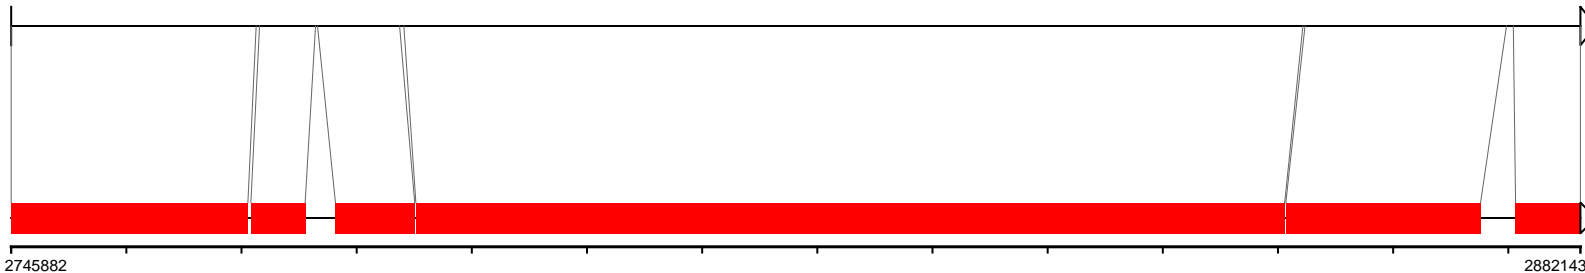

GL397330.1

Rpts

Tandem Rpts

SDs

Gaps

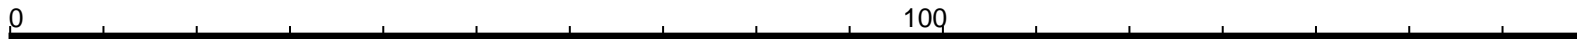

KBases BAC

Gaps in BAC

AC198155.2

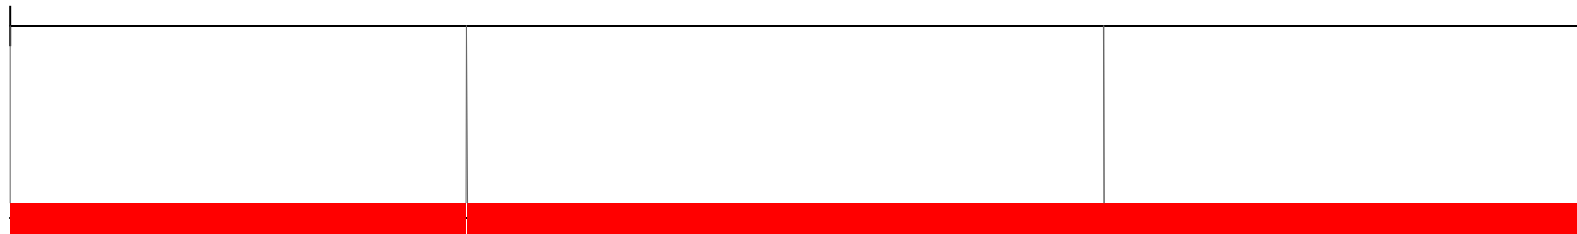

GL397368.1

965459 1133779

Rpts  
Tandem Rpts  
SDs  
Gaps

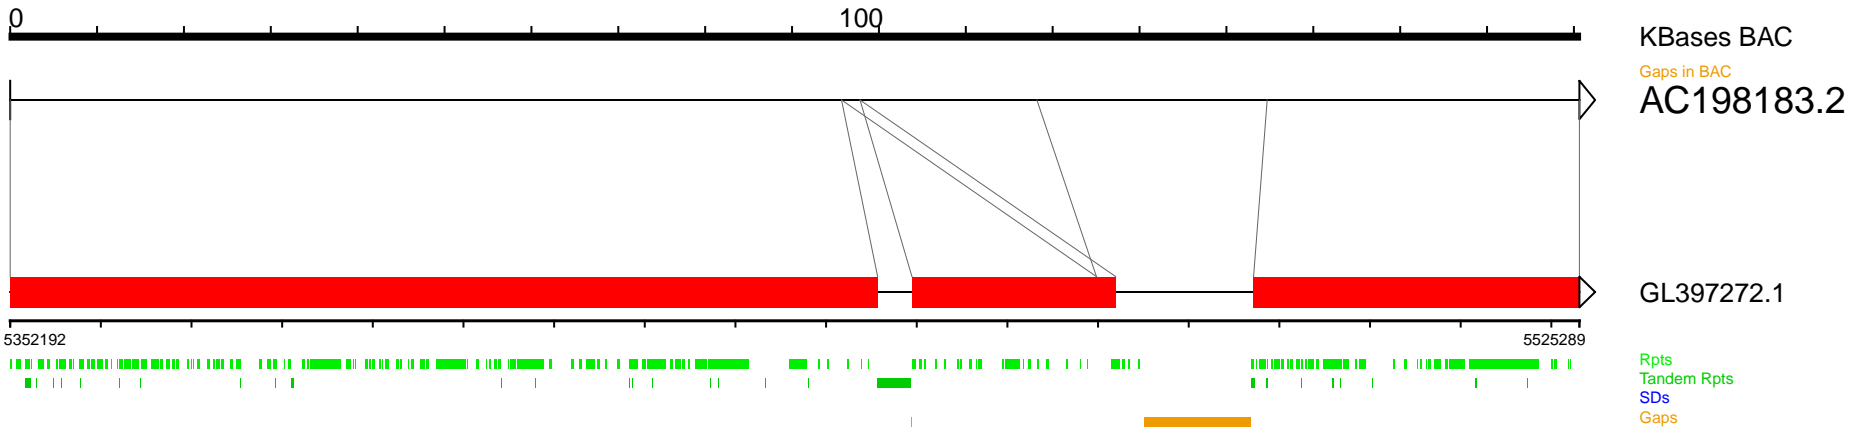

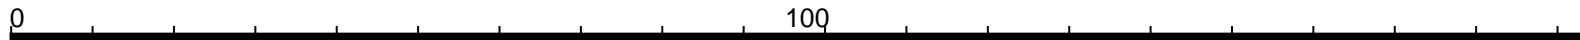

KBases BAC  
Gaps in BAC  
AC198526.1

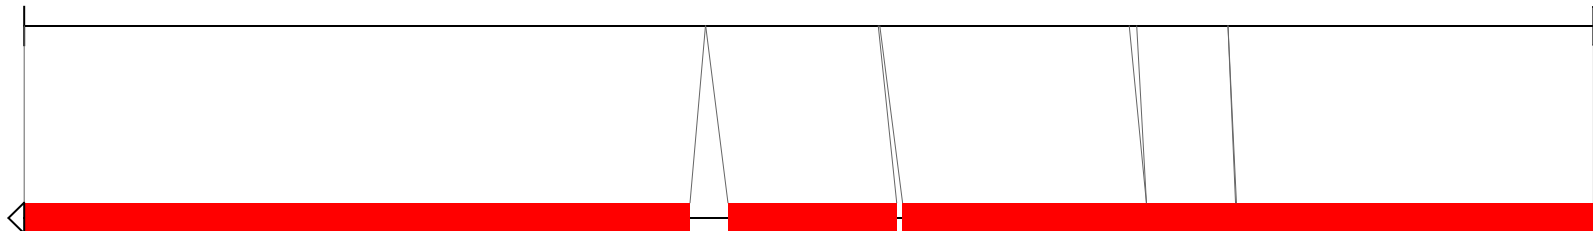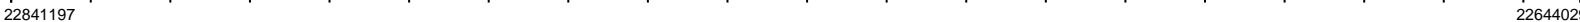

GL397298.1  
Rpts  
Tandem Rpts  
SDs  
Gaps

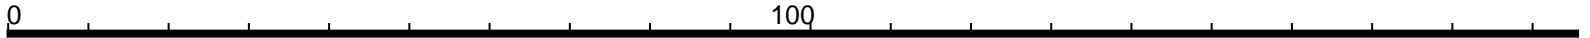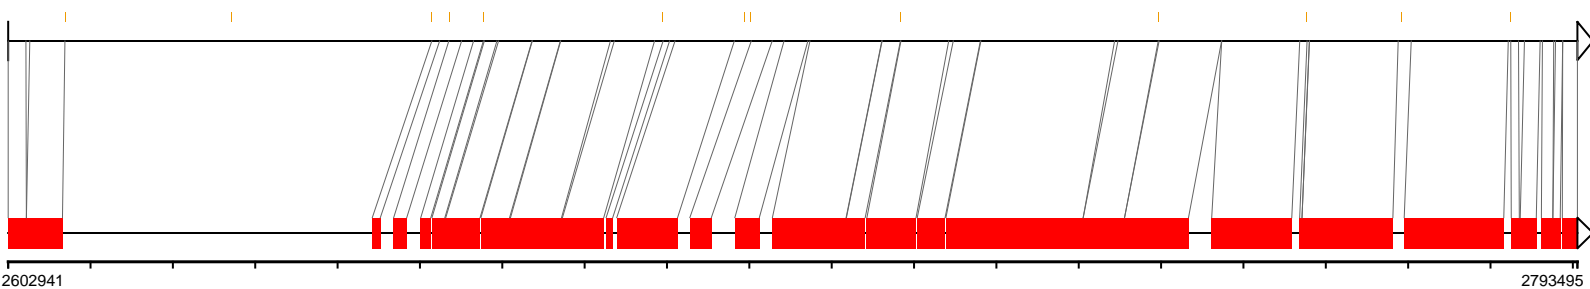

KBases BAC

Gaps in BAC

AC198555.4

GL397326.1

Rpts

Tandem Rpts

SDs

Gaps

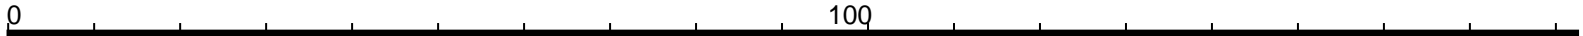

KBases BAC

Gaps in BAC

AC198875.2

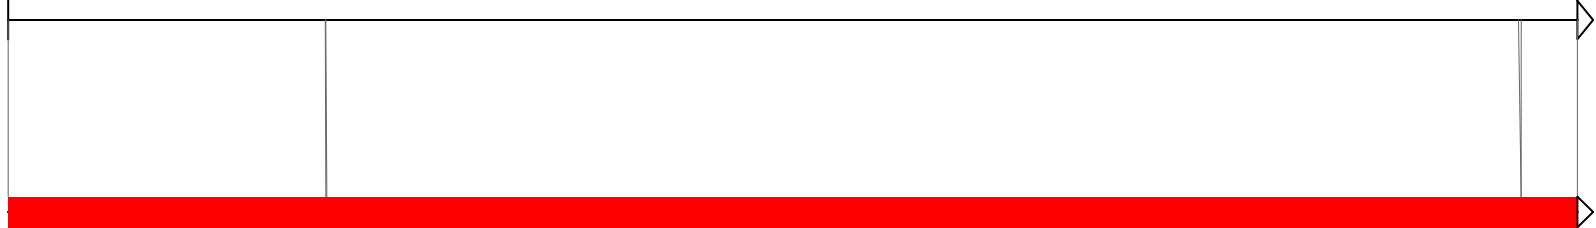

GL397261.1

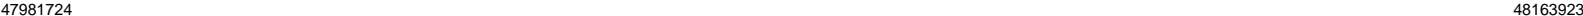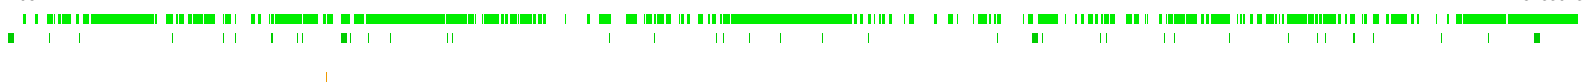

Rpts  
Tandem Rpts  
SDs  
Gaps

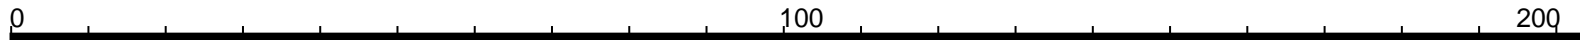

KBases BAC

Gaps in BAC

AC198945.2

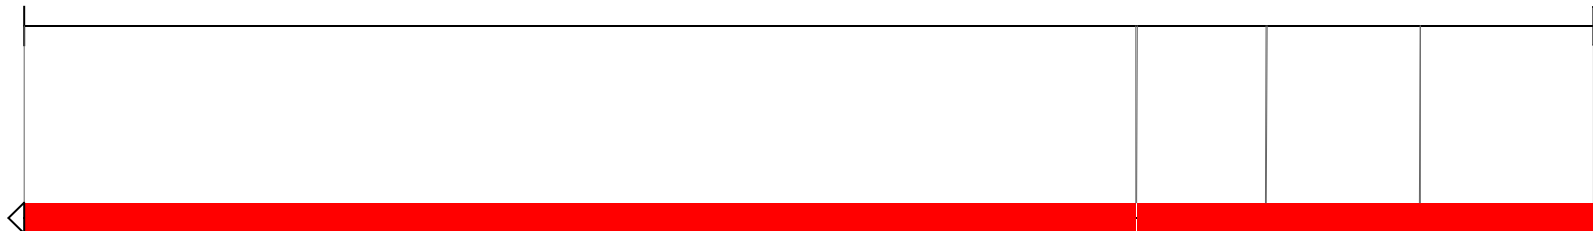

GL397271.1

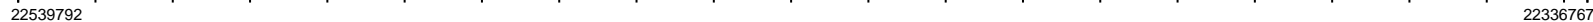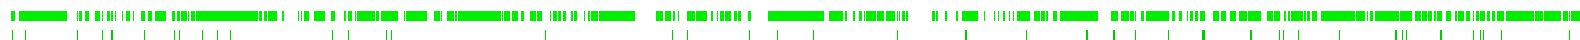

Rpts  
Tandem Rpts  
SDs  
Gaps

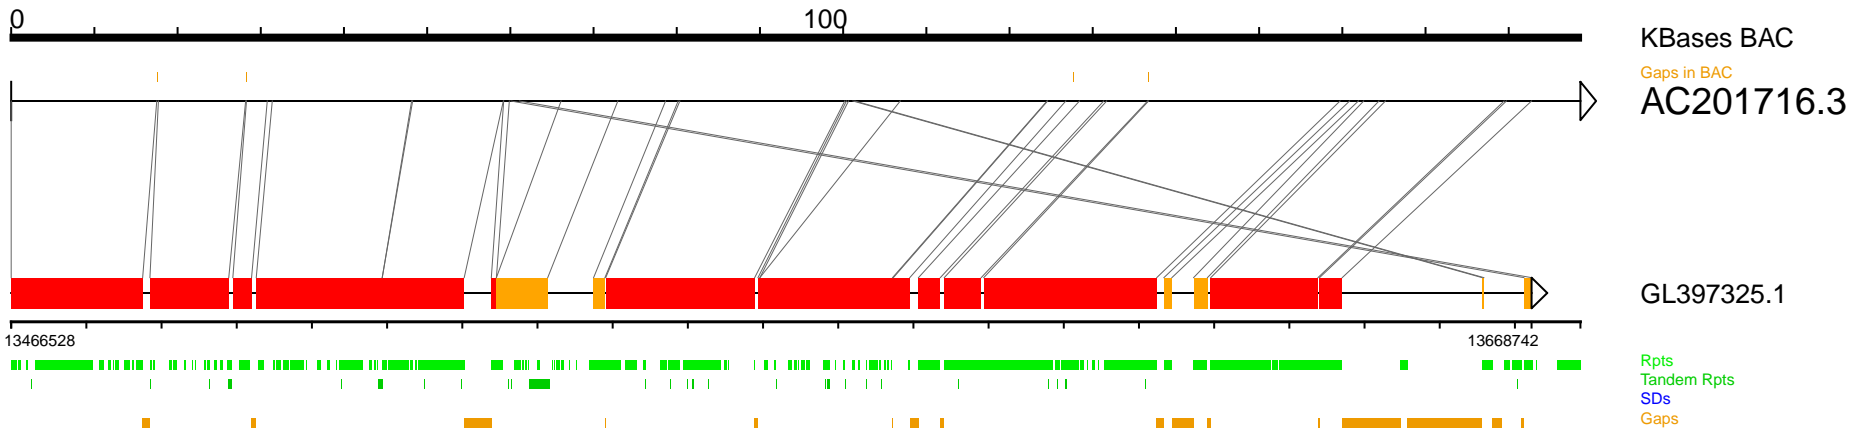

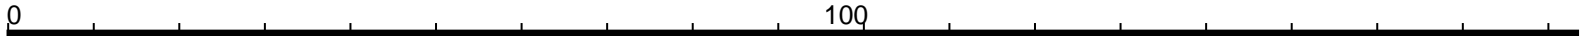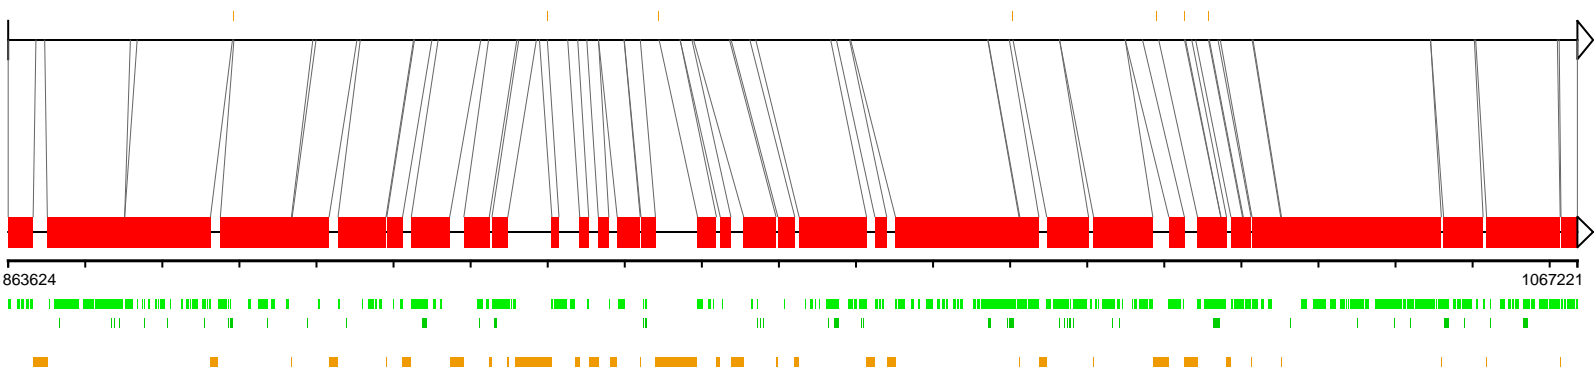

KBases BAC  
AC202246.3

GL397425.1

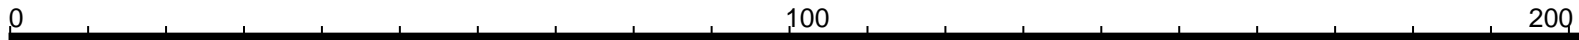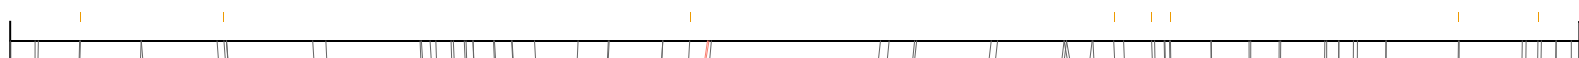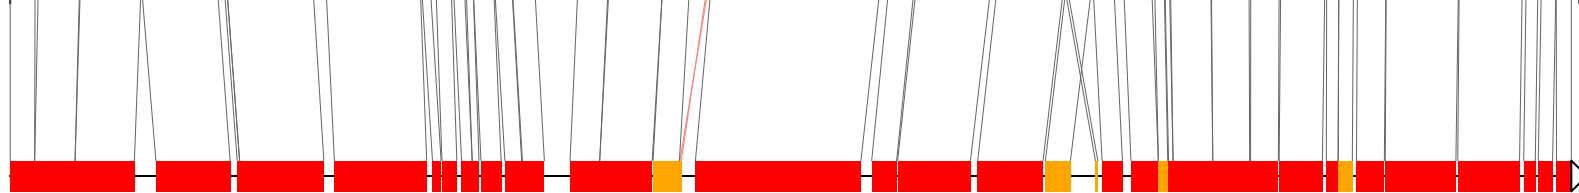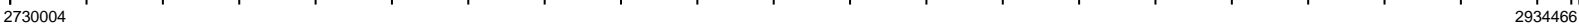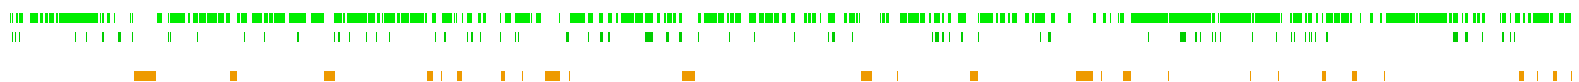

KBases BAC  
AC202251.3

GL397326.1

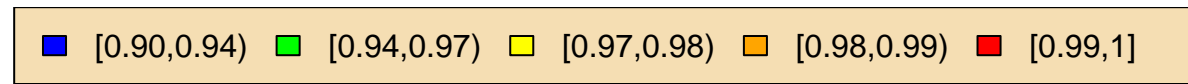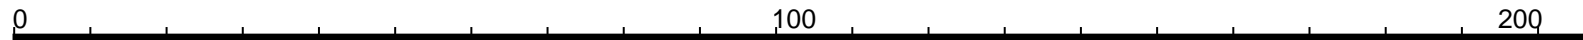

Kbases BAC

Gaps in BAC

AC203119.2

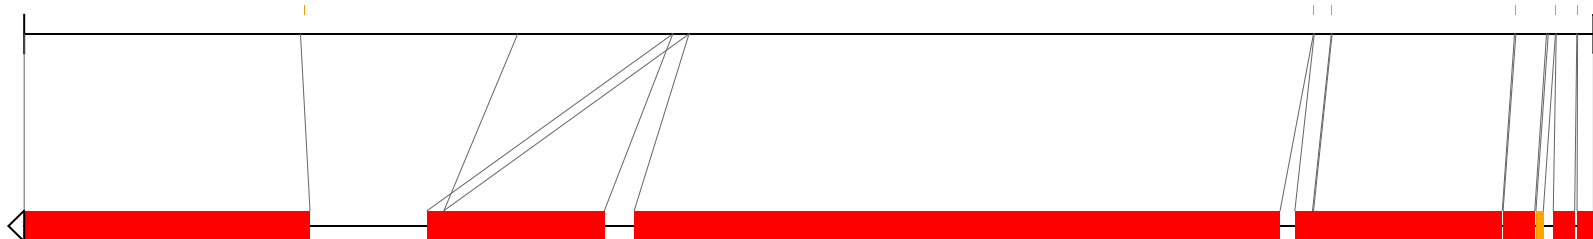

GL397272.1

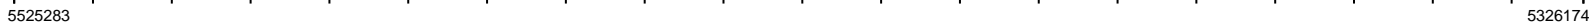

Rpts  
Tandem Rpts  
SDs  
Gaps

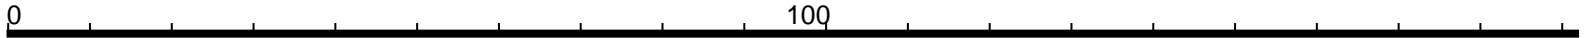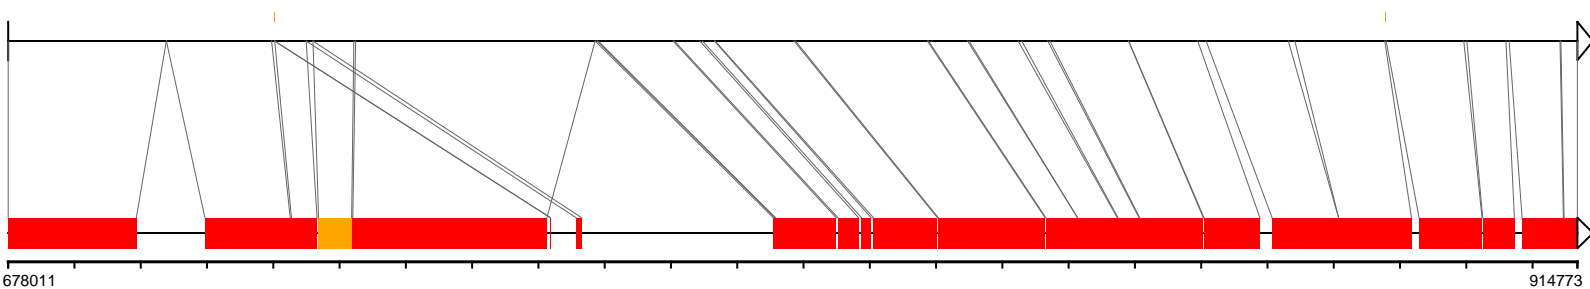

Kbases BAC  
Gaps in BAC  
AC203485.2

GL397425.1

Rpts  
Tandem Rpts  
SDs  
Gaps

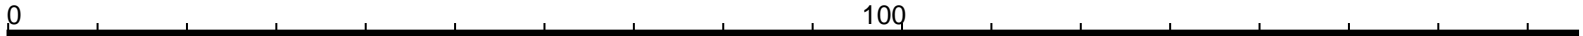

KBases BAC

Gaps in BAC

AC203487.2

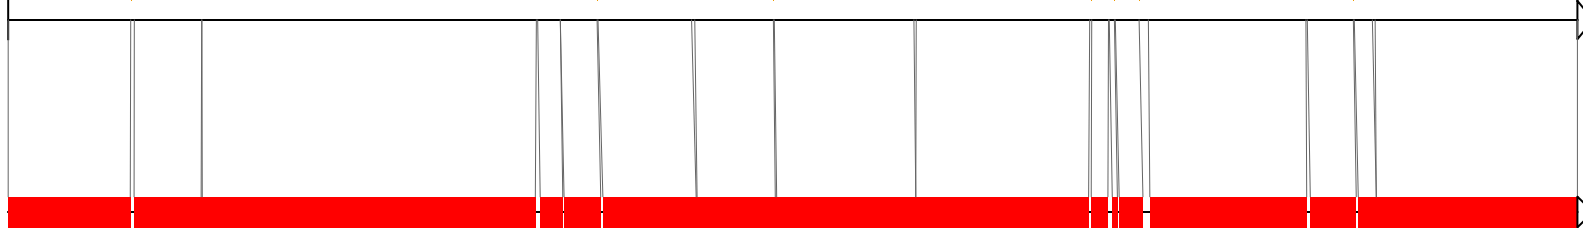

GL397448.1

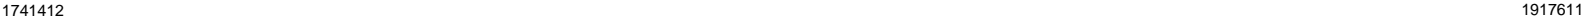

Rpts  
Tandem Rpts  
SDs  
Gaps

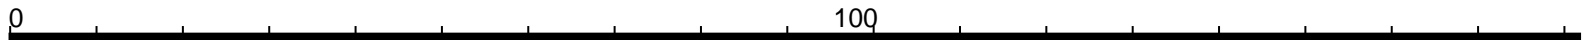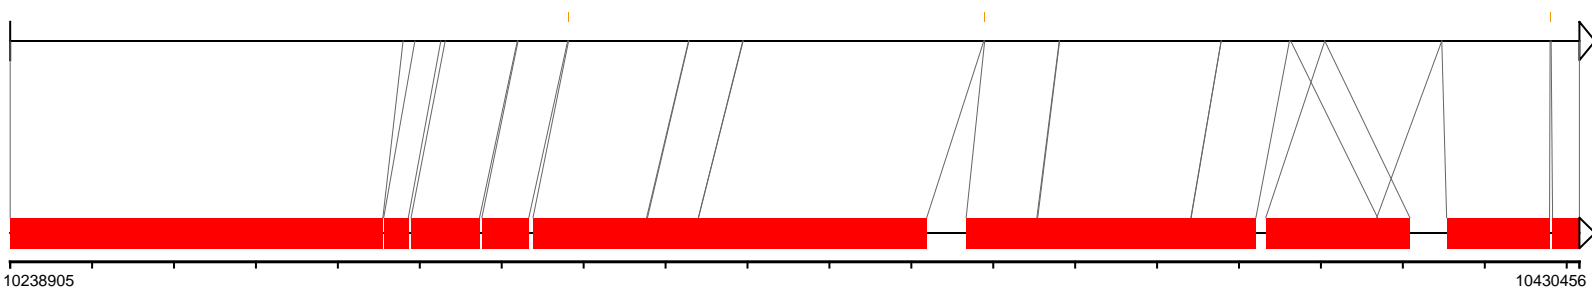

KBases BAC  
AC203709.2

GL397305.1

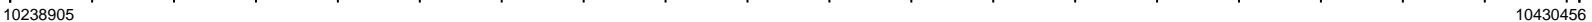

Rpts  
Tandem Rpts  
SDs  
Gaps

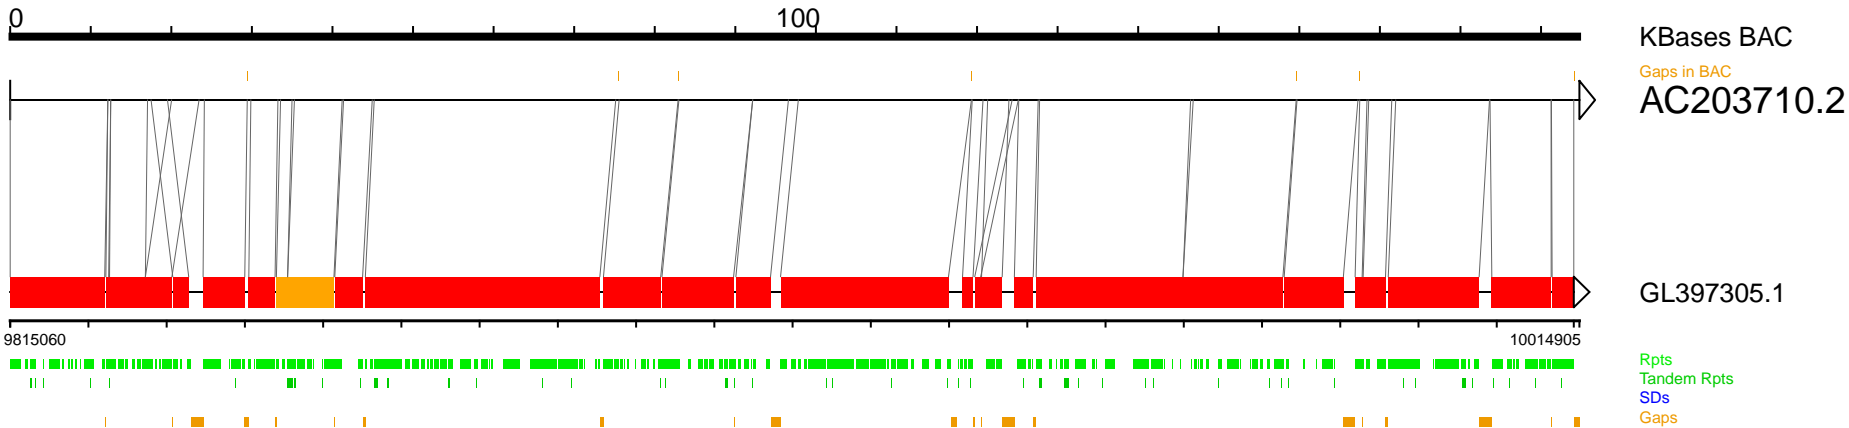

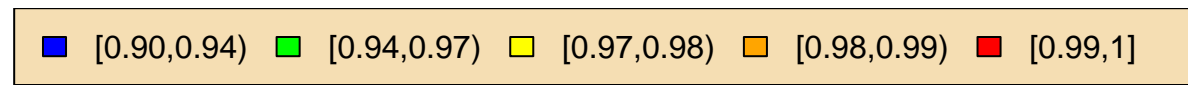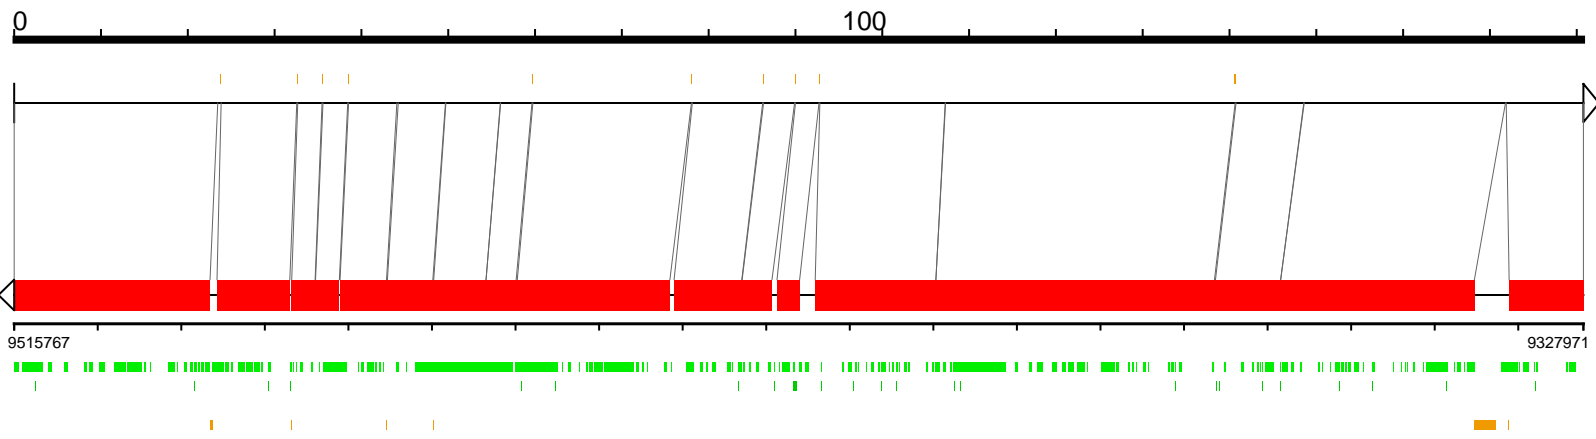

KBases BAC  
Gaps in BAC  
AC203711.2

GL397285.1

Rpts  
Tandem Rpts  
SDs  
Gaps

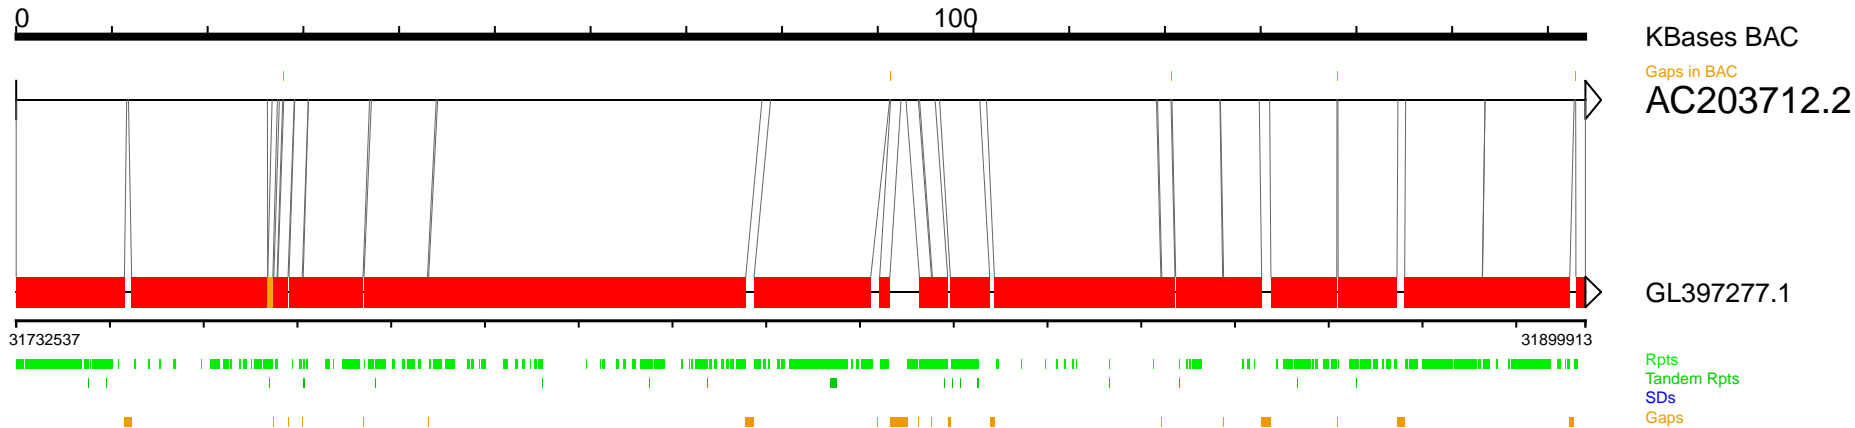

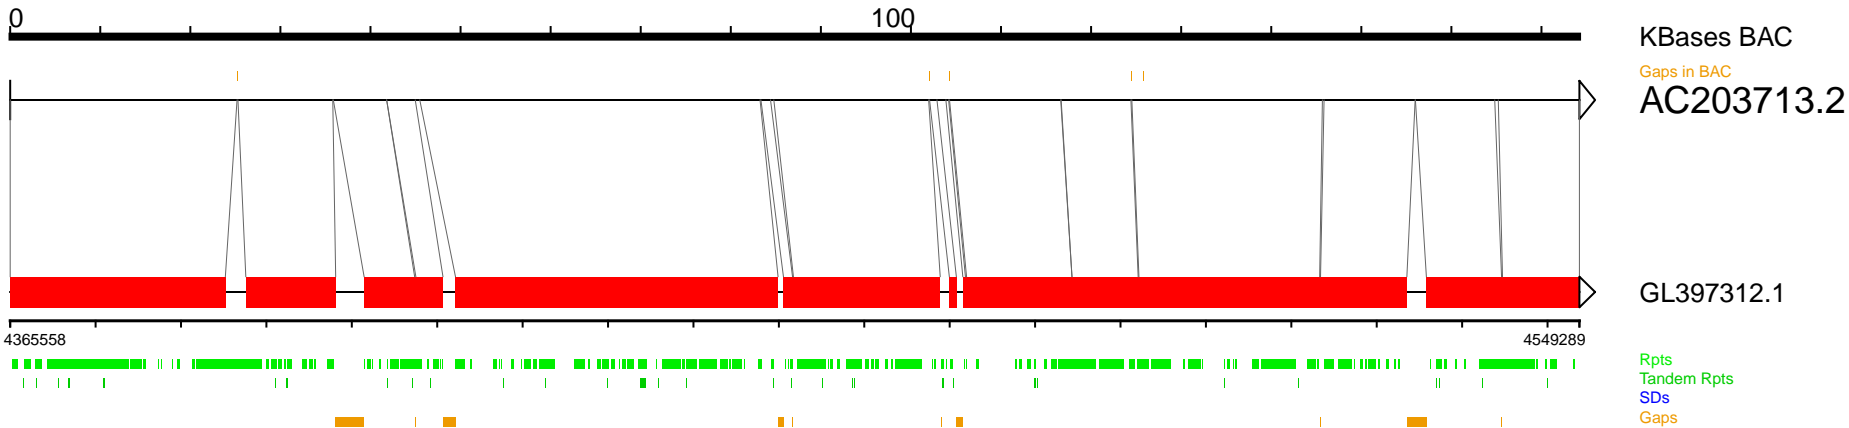

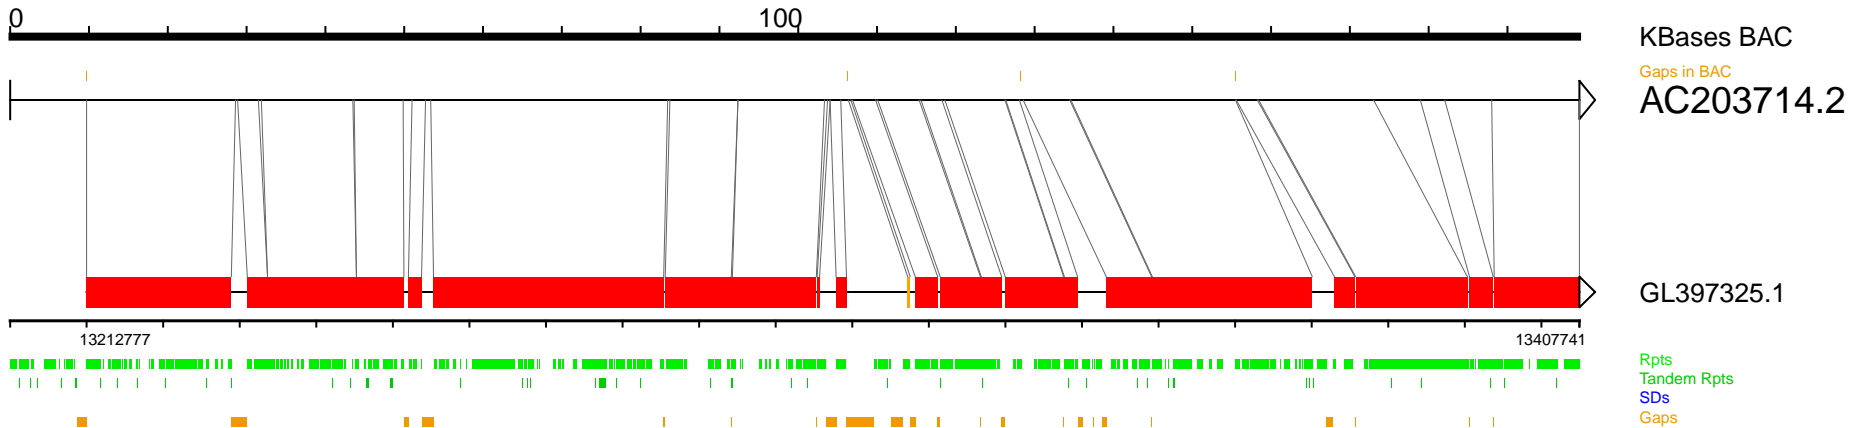

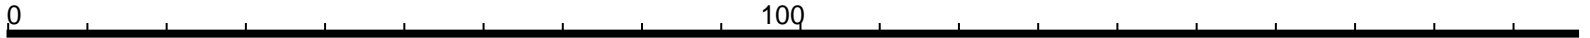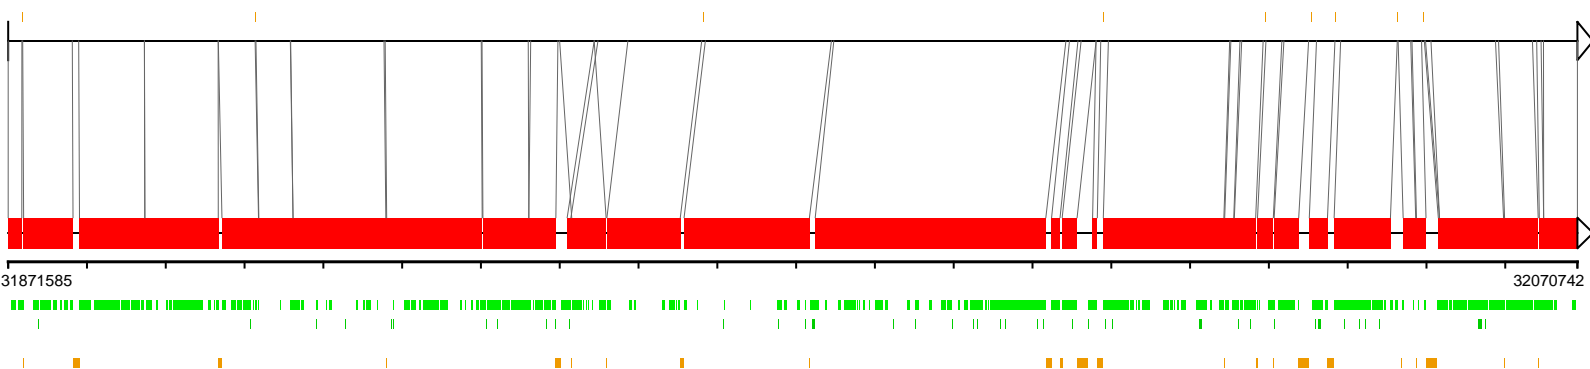

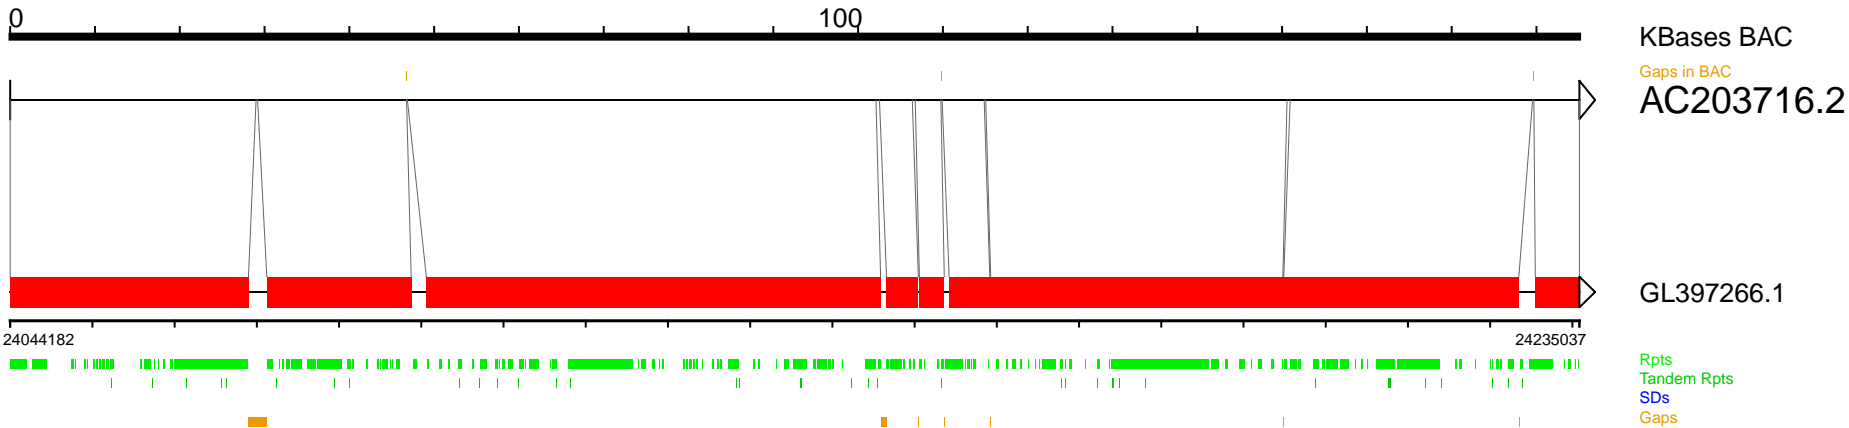

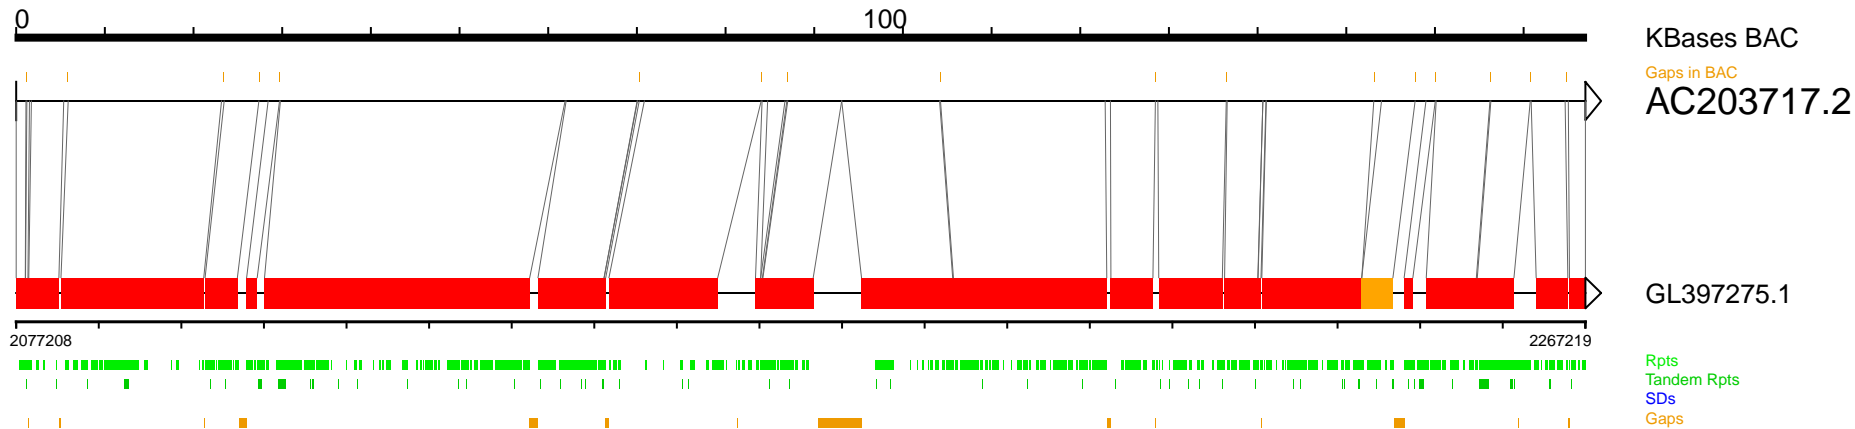

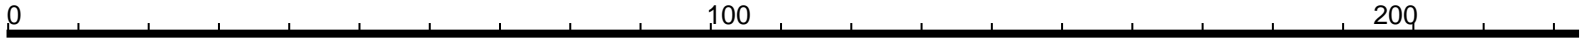

Kbases BAC

Gaps in BAC

AC203718.2

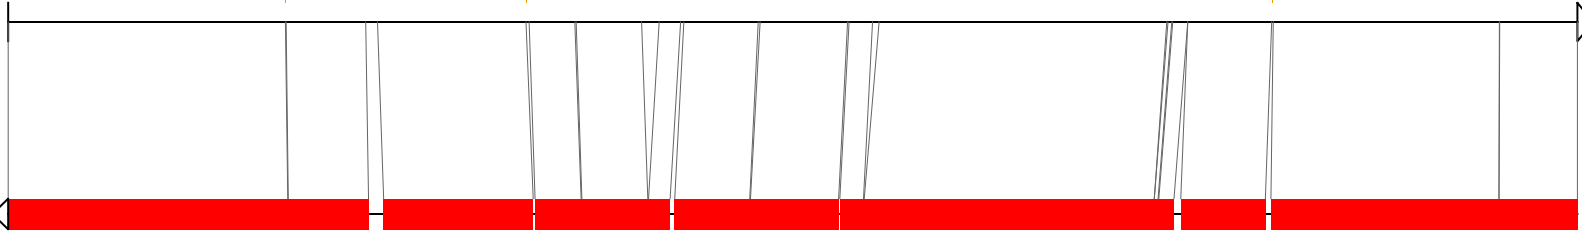

GL397272.1

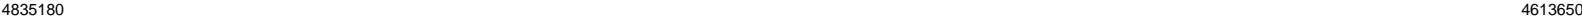

Rpts  
Tandem Rpts  
SDs  
Gaps

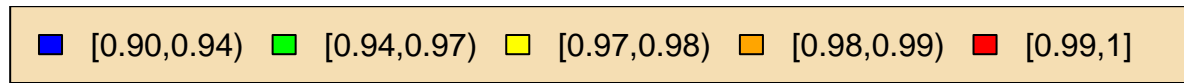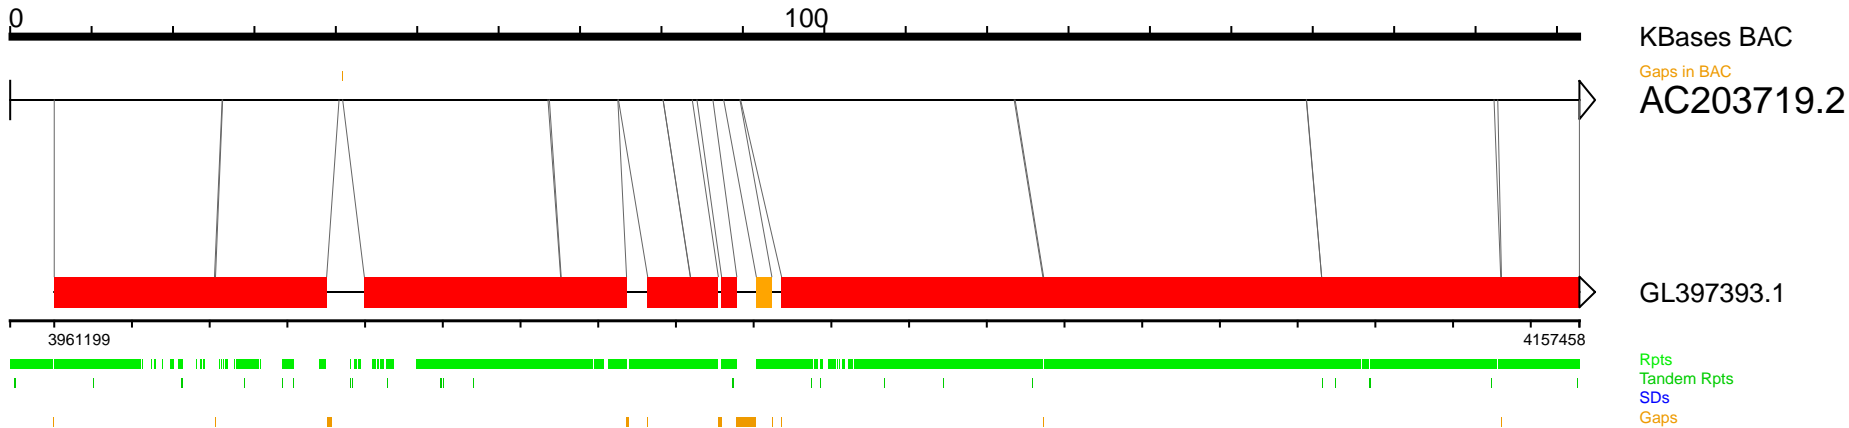

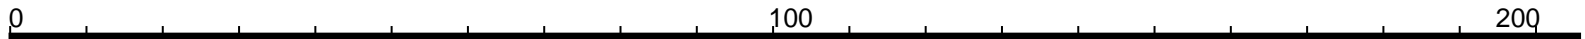

KBases BAC

Gaps in BAC

AC203720.2

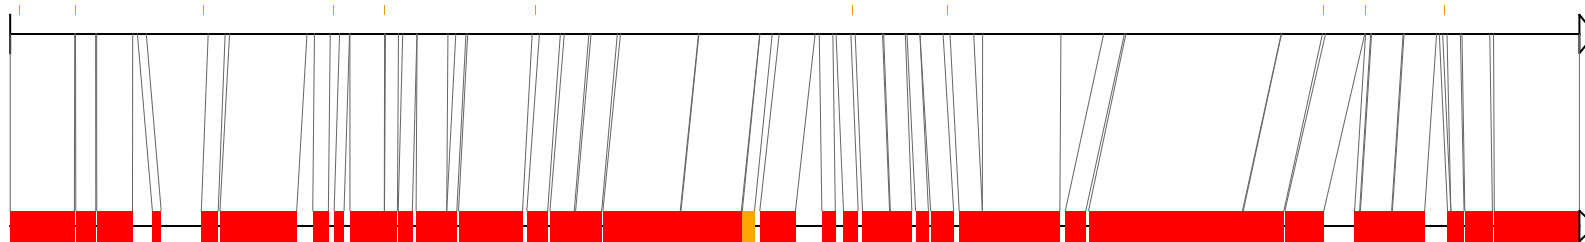

GL397275.1

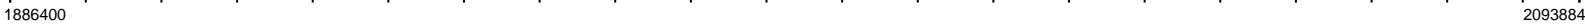

Rpts  
Tandem Rpts  
SDs  
Gaps

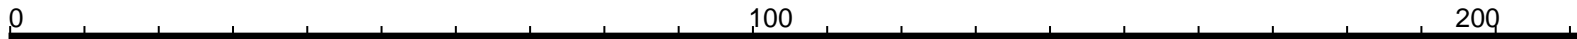

Kbases BAC

Gaps in BAC

AC203721.2

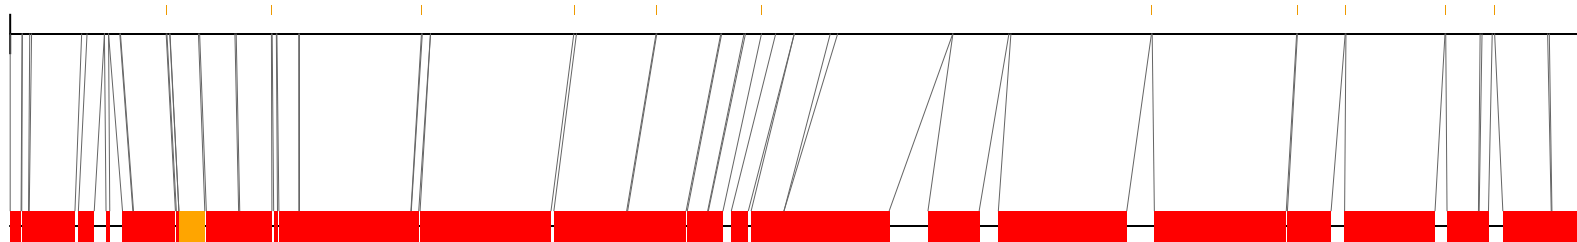

GL397262.1

50203165

50434386

Rpts  
Tandem Rpts  
SDs  
Gaps

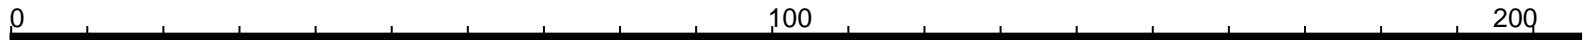

Kbases BAC

Gaps in BAC

AC203722.3

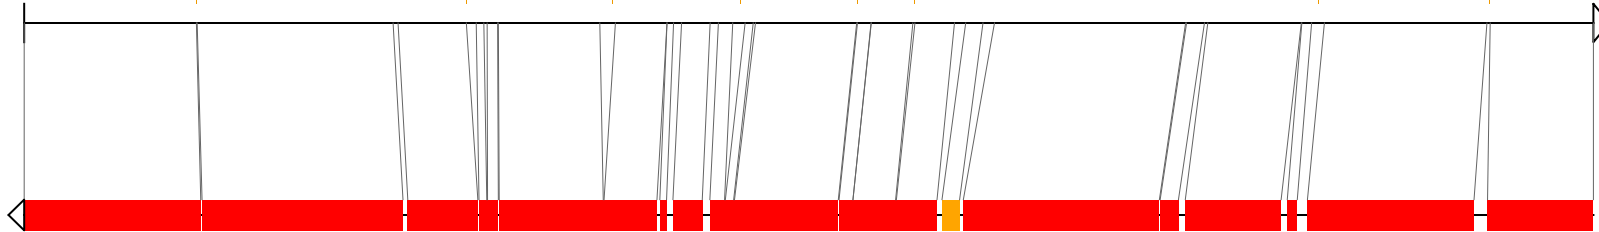

GL397272.1

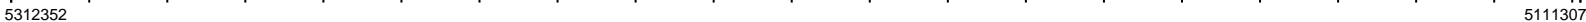

Rpts  
Tandem Rpts  
SDs  
Gaps

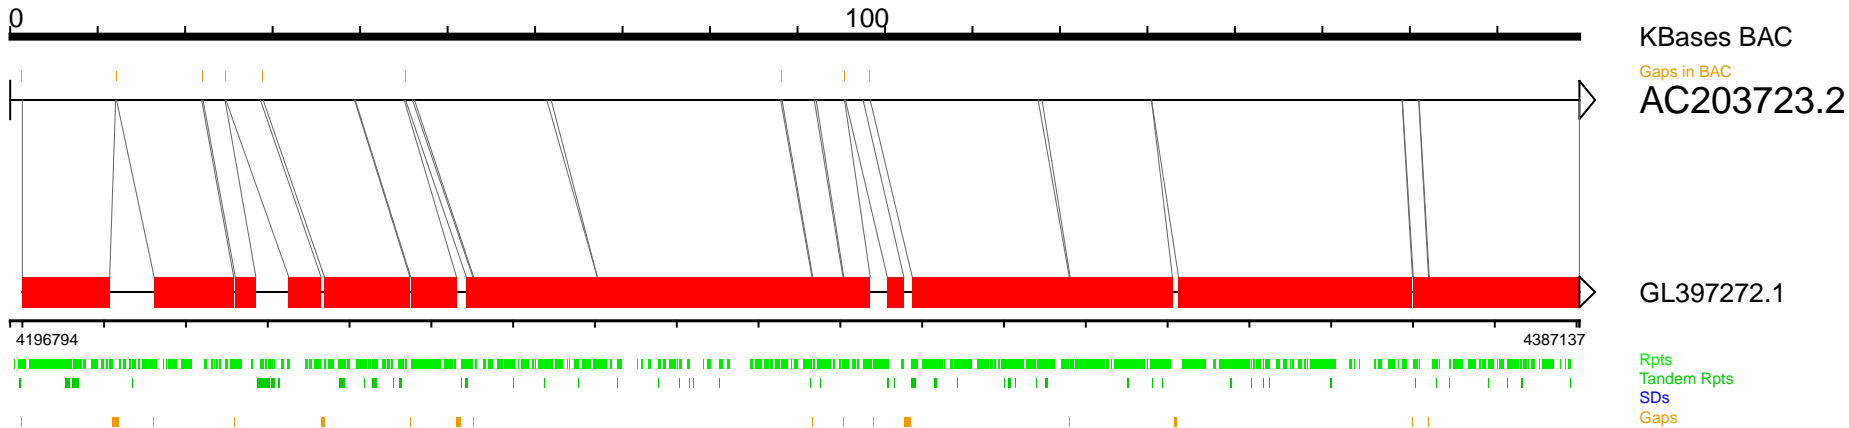

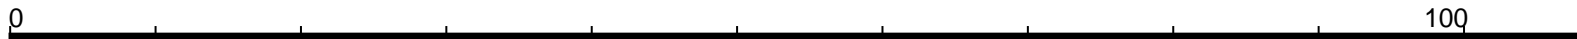

KBases BAC

Gaps in BAC

AC203724.2

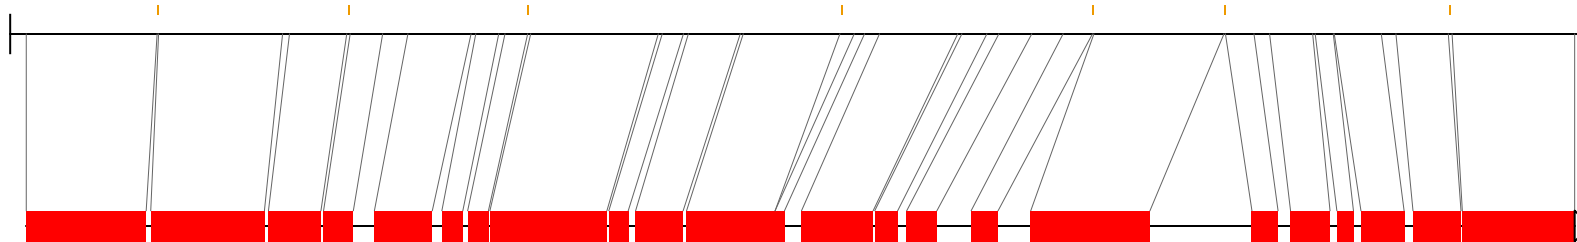

GL397294.1

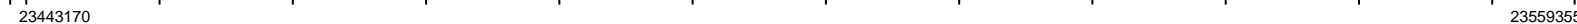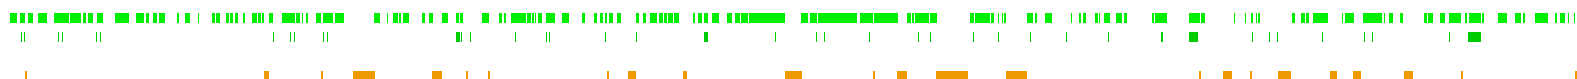

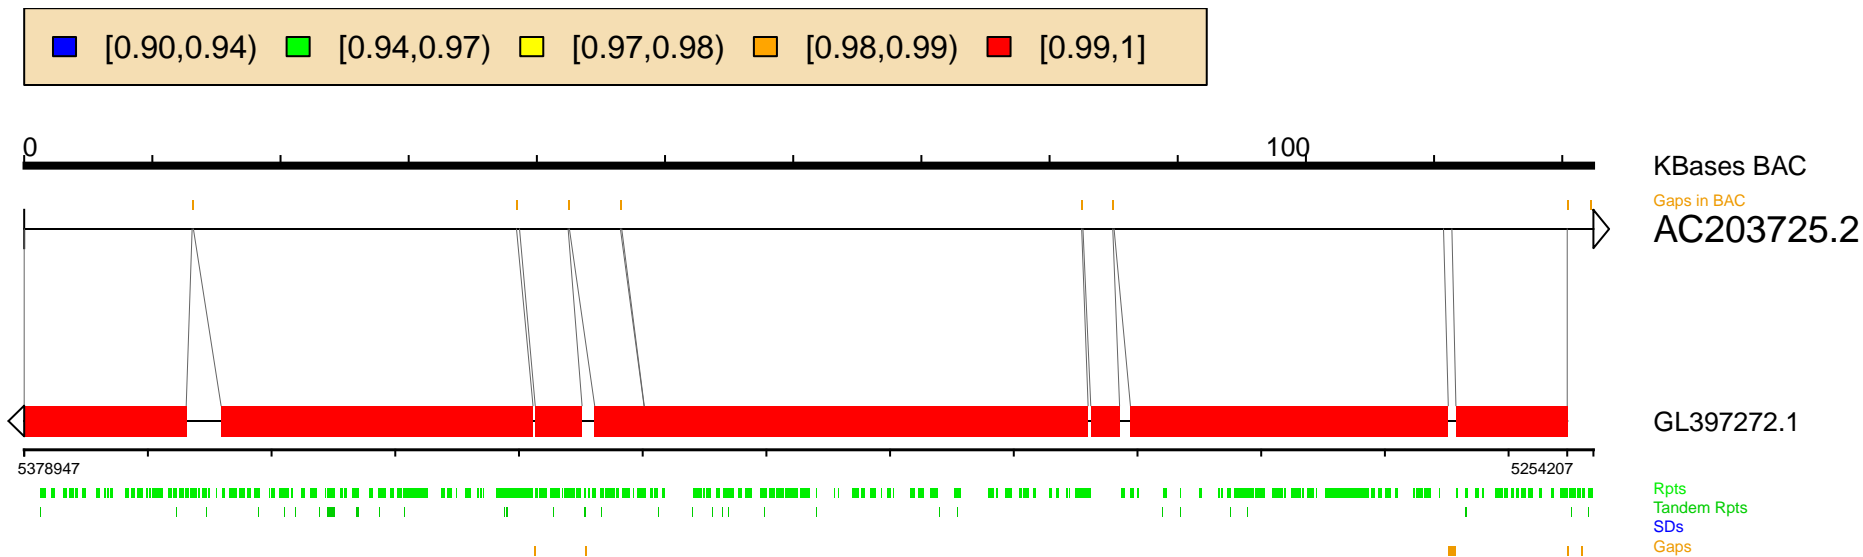

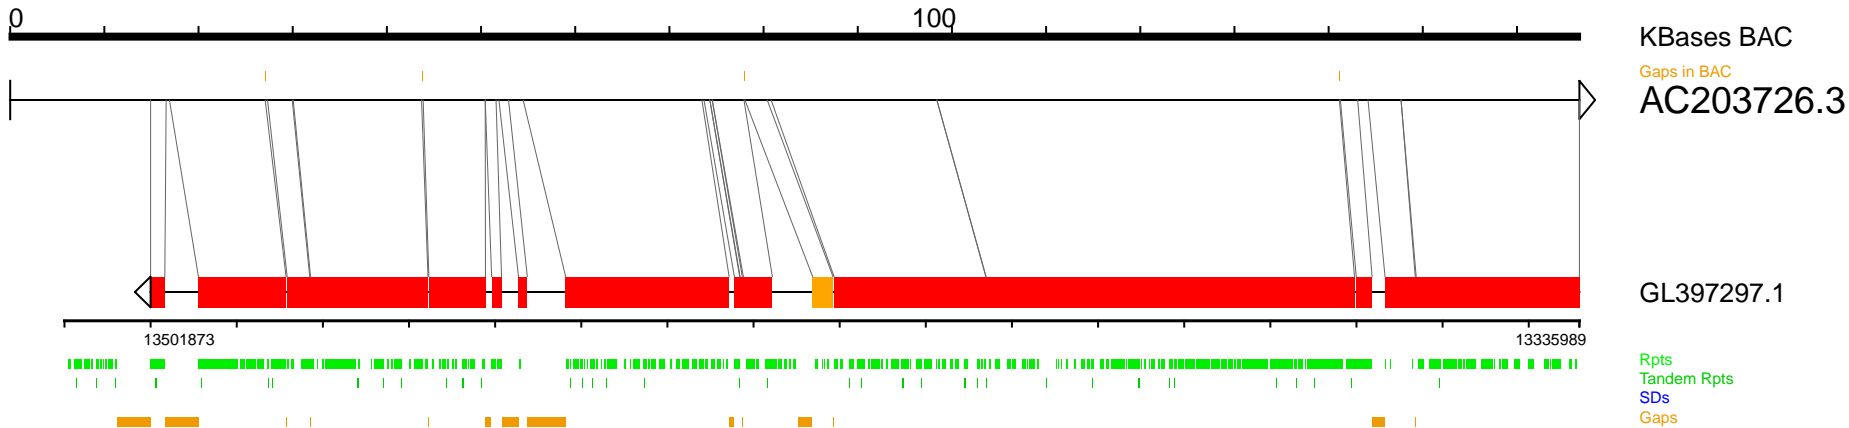

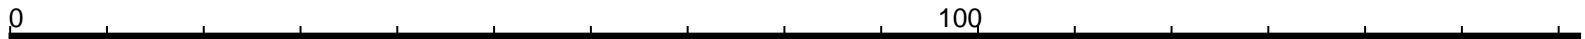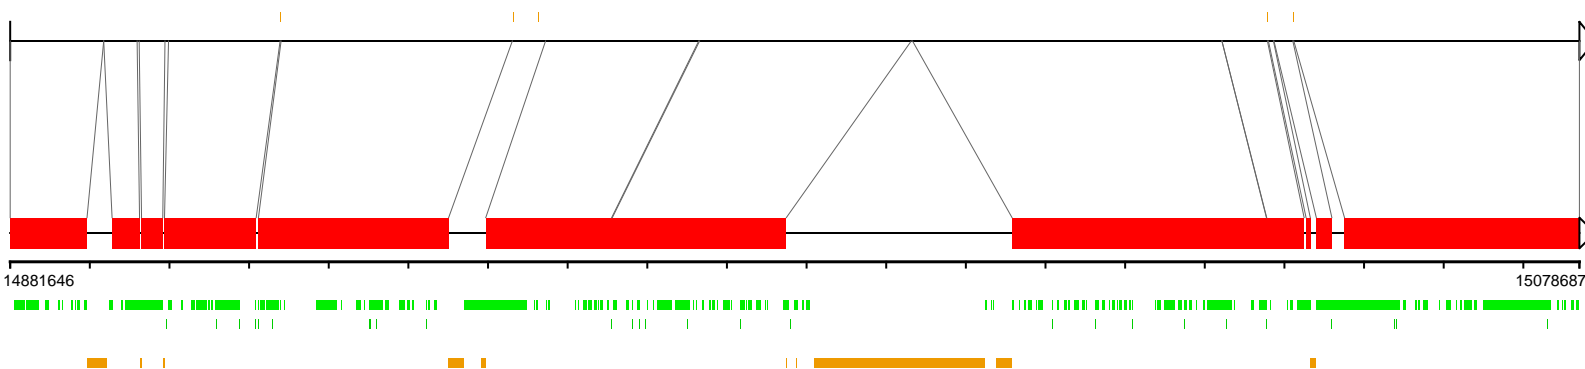

KBases BAC

Gaps in BAC

AC204179.2

GL397289.1

Rpts  
Tandem Rpts  
SDs  
Gaps

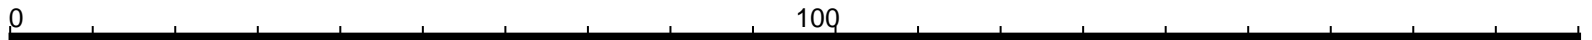

KBases BAC

Gaps in BAC

AC204180.2

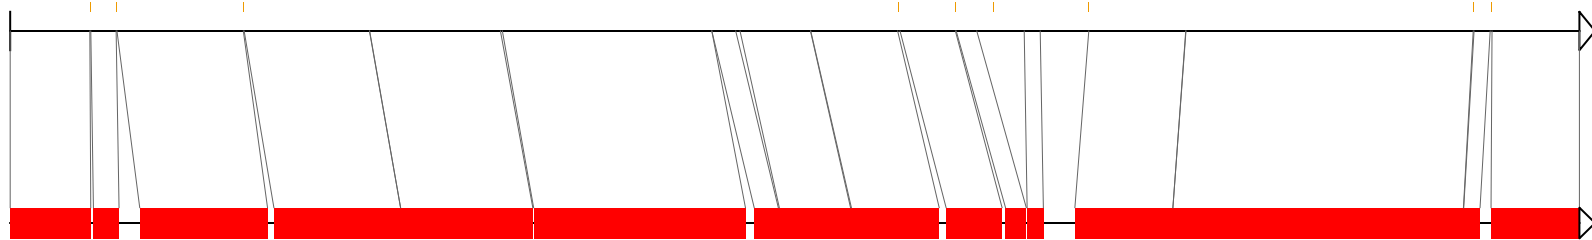

GL397306.1

4818612

5006586

Rpts  
Tandem Rpts  
SDs  
Gaps

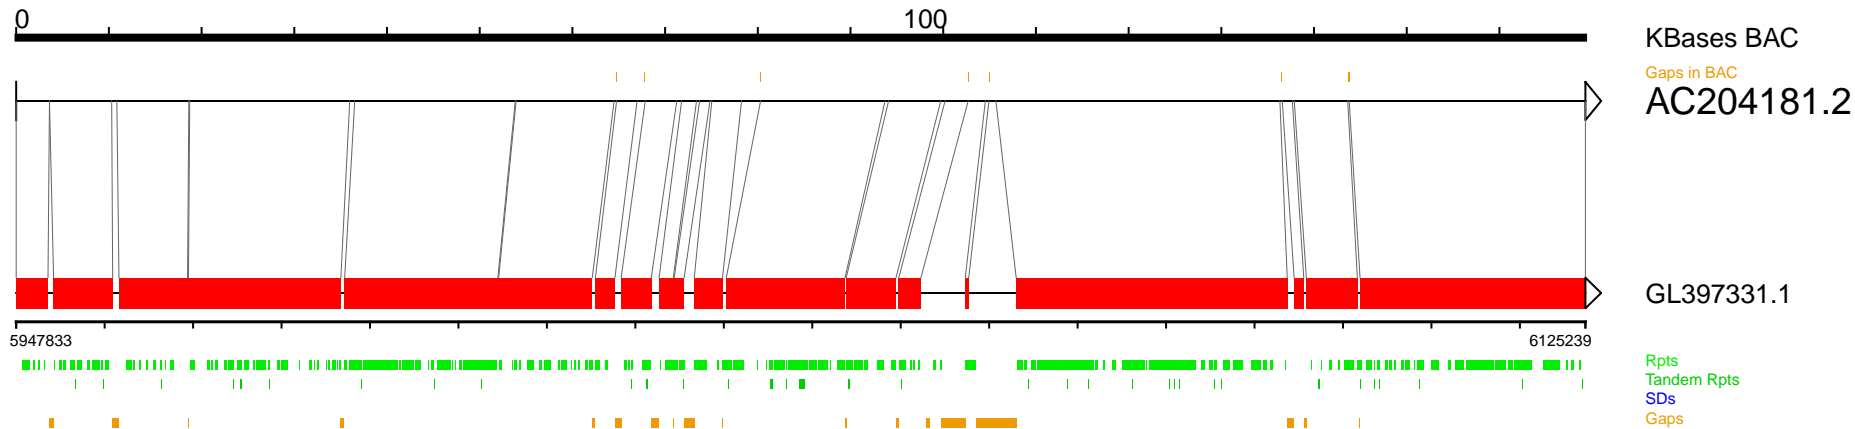

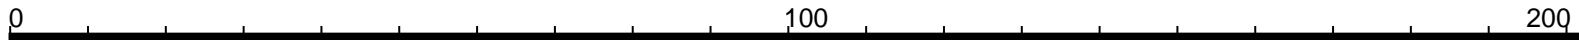

KBases BAC

Gaps in BAC

AC204182.2

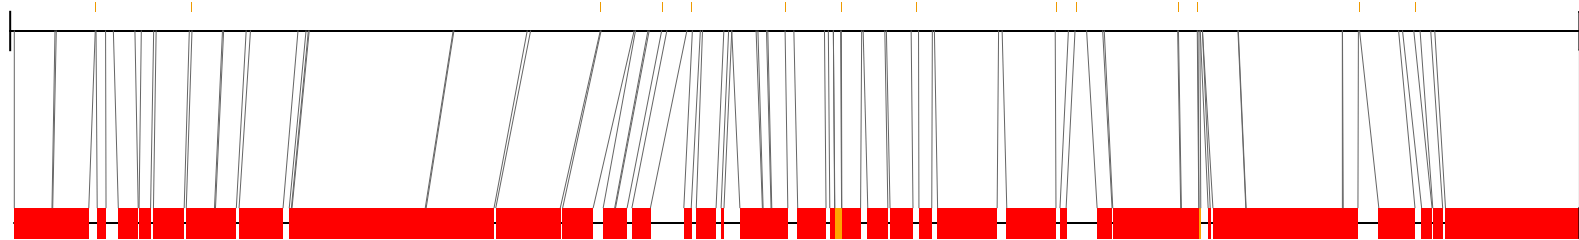

GL397272.1

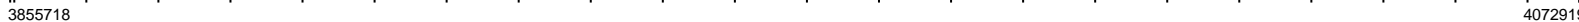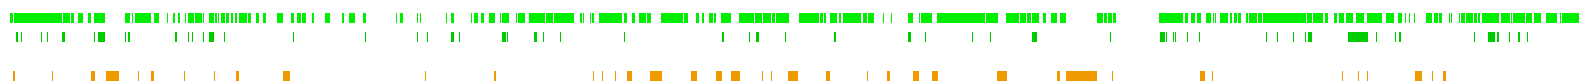

Rpts  
Tandem Rpts  
SDs  
Gaps

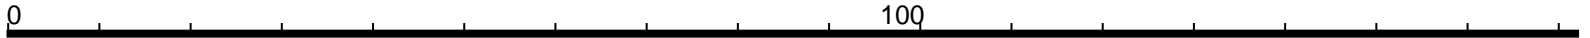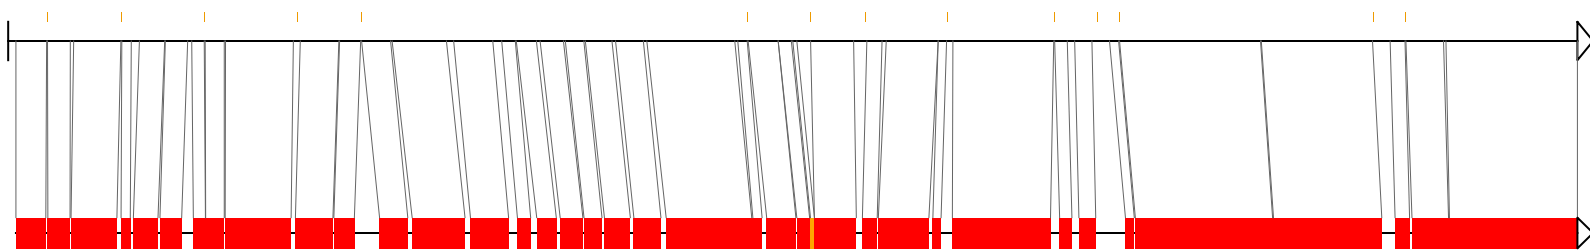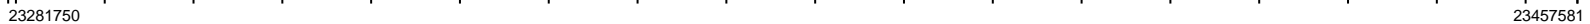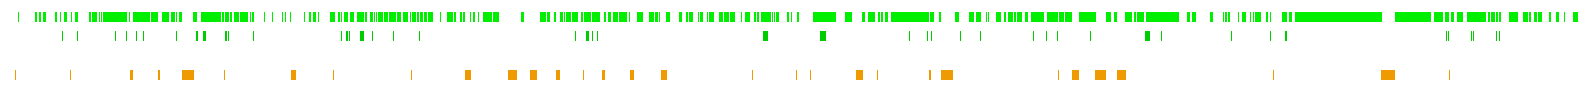

Kbases BAC  
AC204183.3

GL397294.1

Rpts  
Tandem Rpts  
SDs  
Gaps

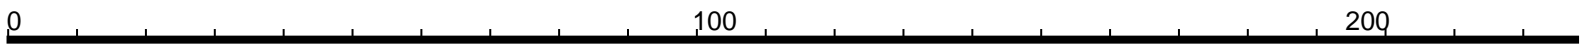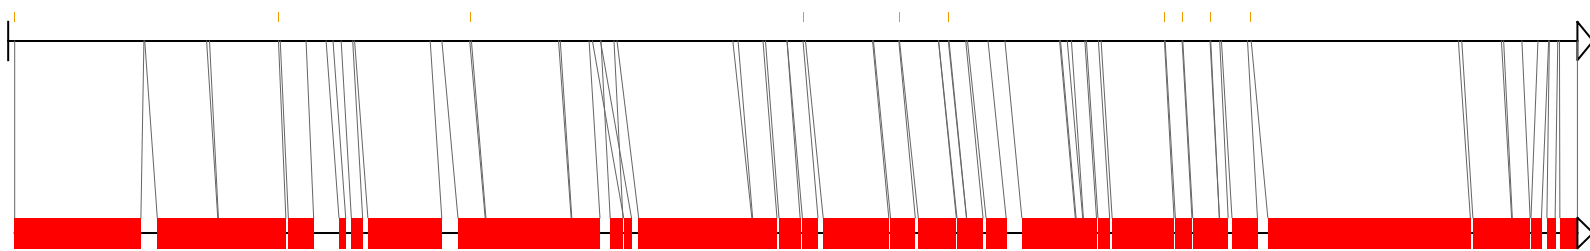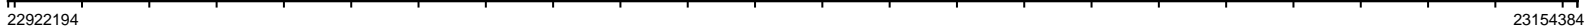

Kbases BAC  
Gaps in BAC  
AC204184.2

GL397294.1  
Rpts  
Tandem Rpts  
SDs  
Gaps

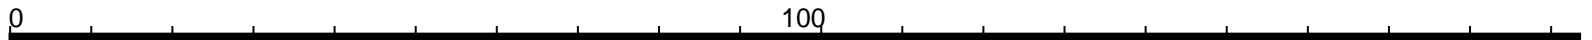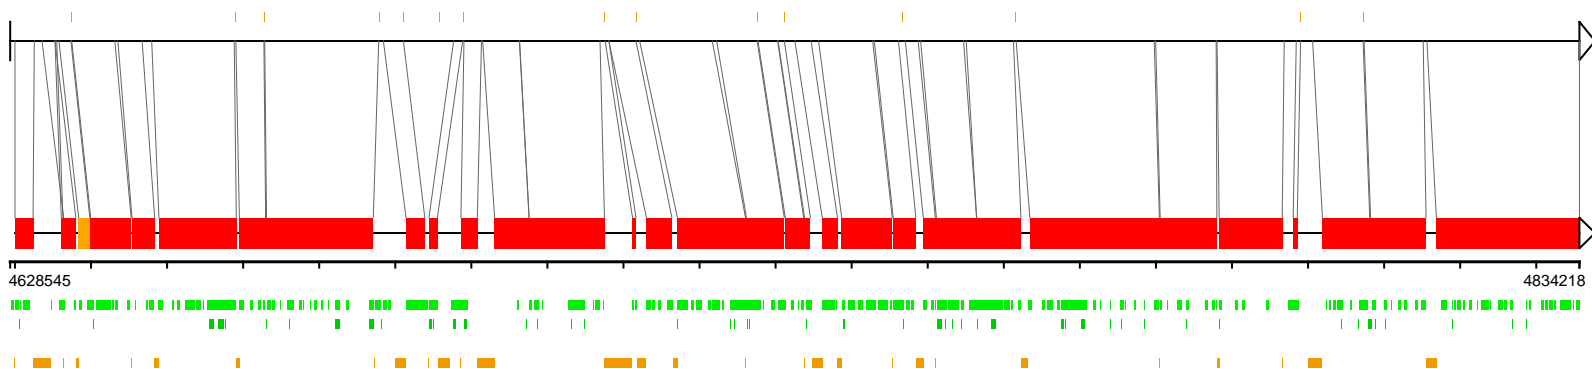

KBases BAC  
AC204185.2

GL397306.1

Rpts  
Tandem Rpts  
SDs  
Gaps

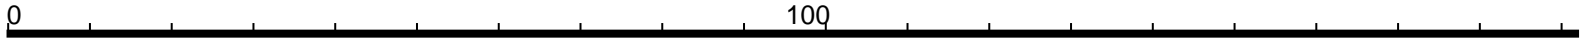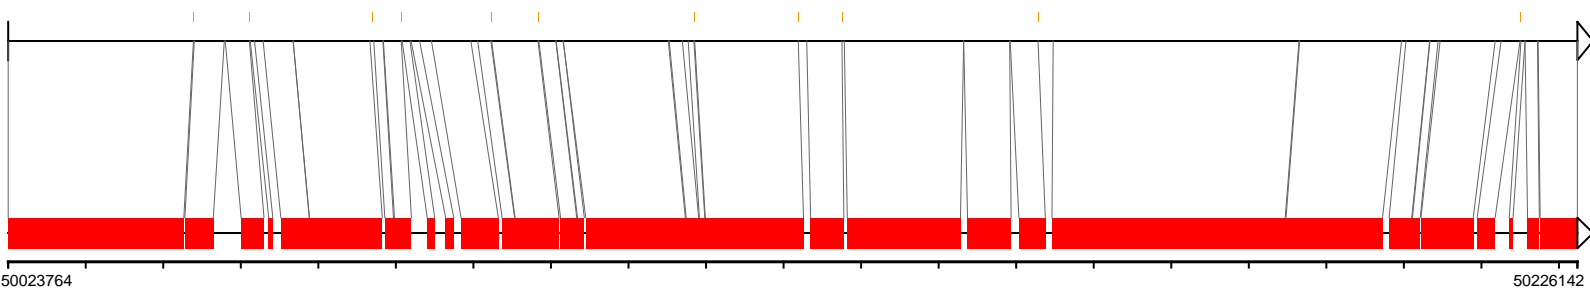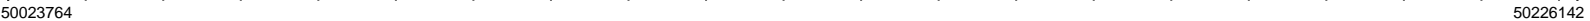

Kbases BAC  
AC204186.3

GL397262.1

Rpts  
Tandem Rpts  
SDs  
Gaps

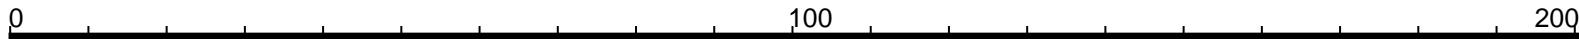

Kbases BAC

Gaps in BAC

AC204446.3

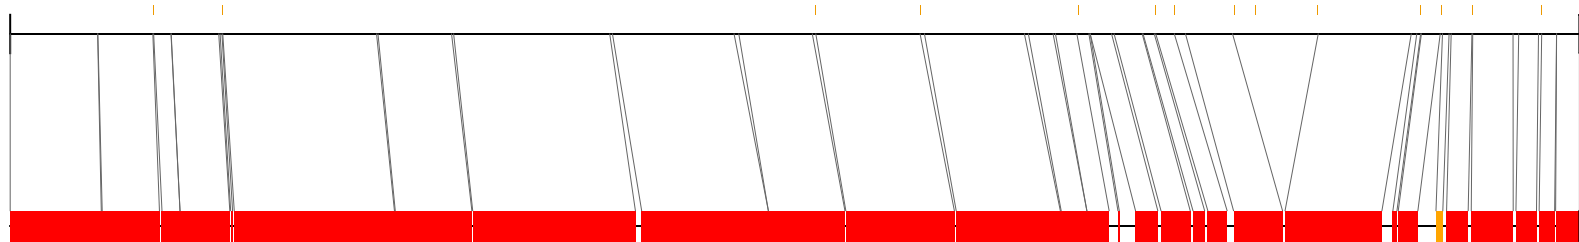

GL397272.1

3524227 3716809

Rpts  
Tandem Rpts  
SDs  
Gaps

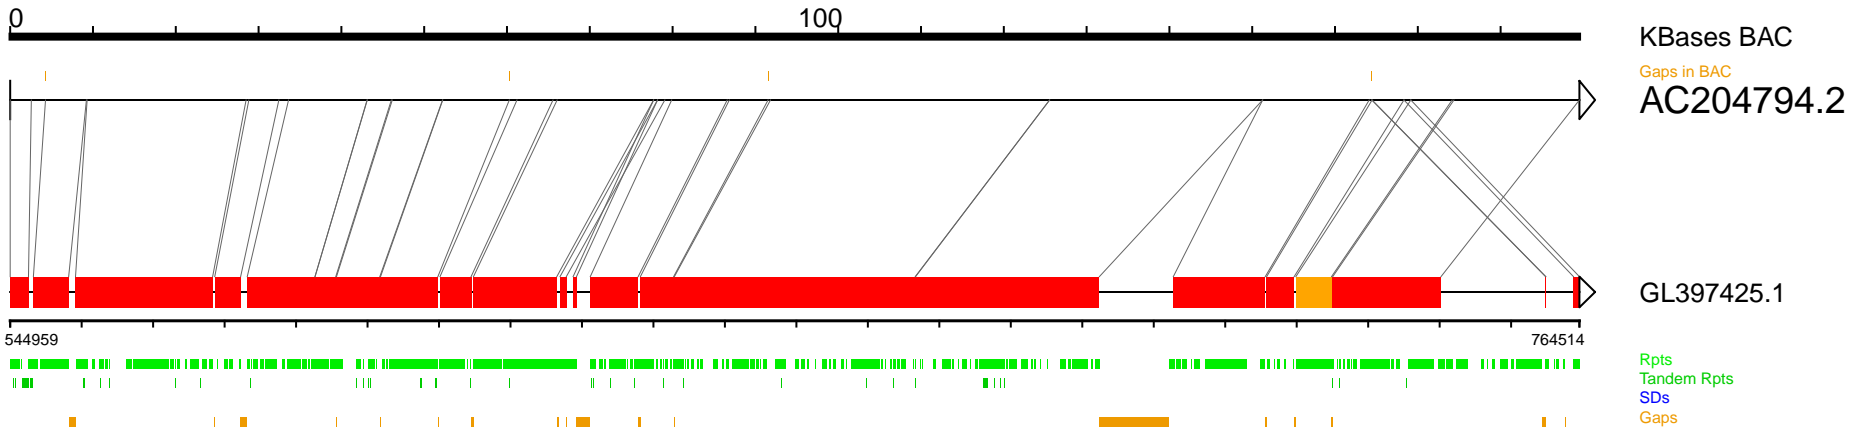

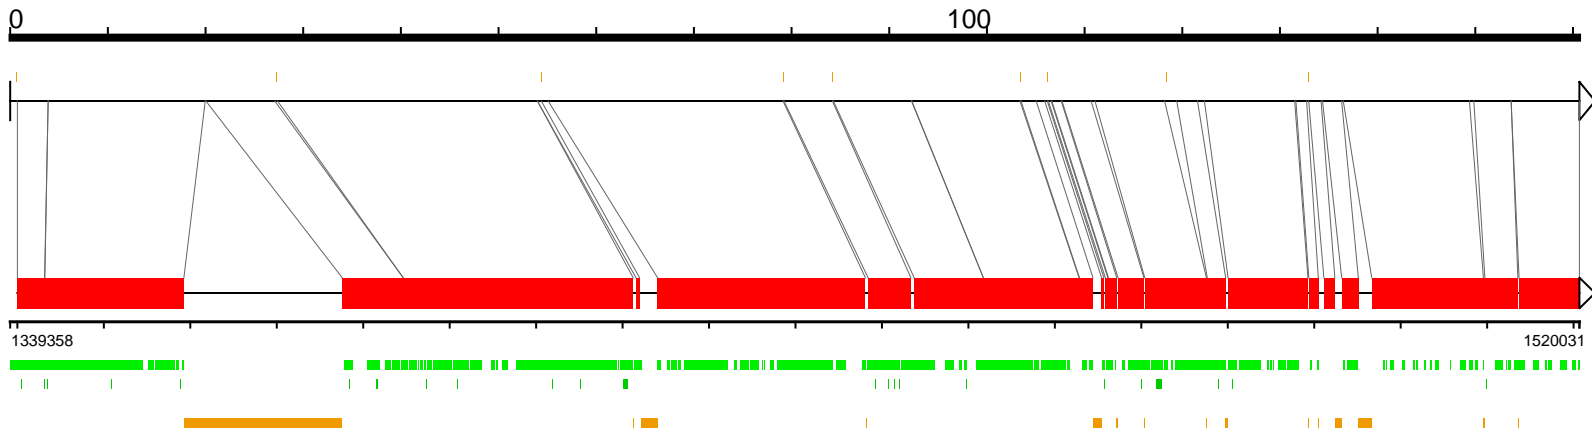

Kbases BAC  
AC204795.2

GL397458.1

Rpts  
Tandem Rpts  
SDs  
Gaps

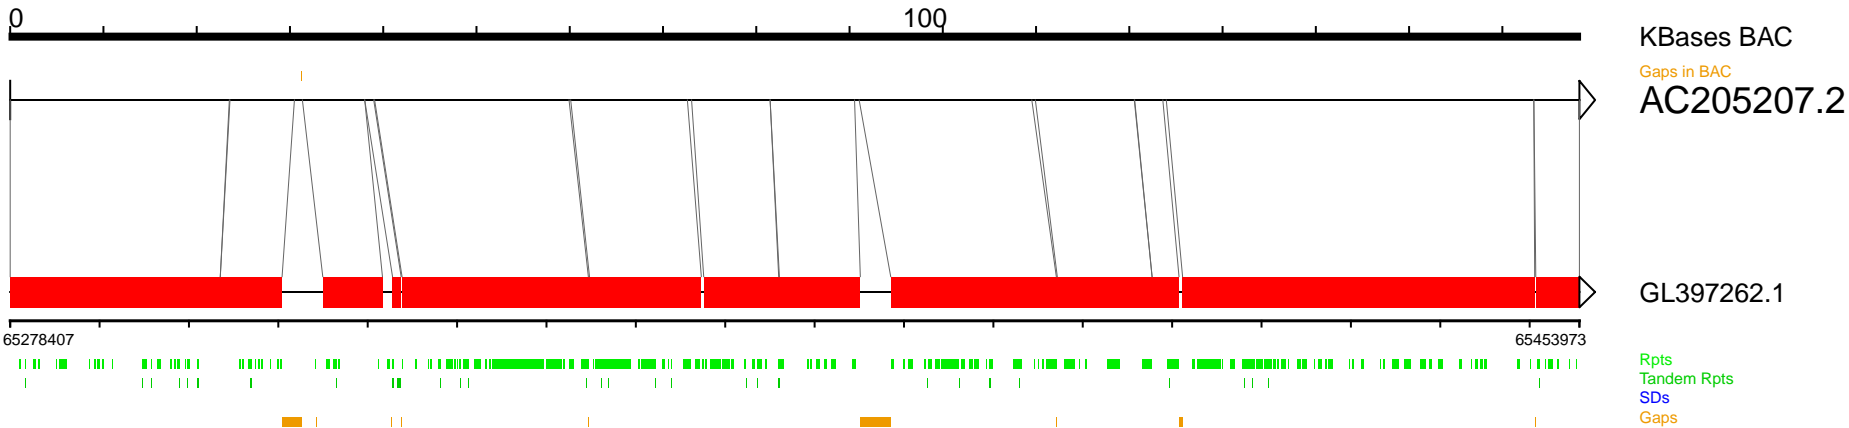

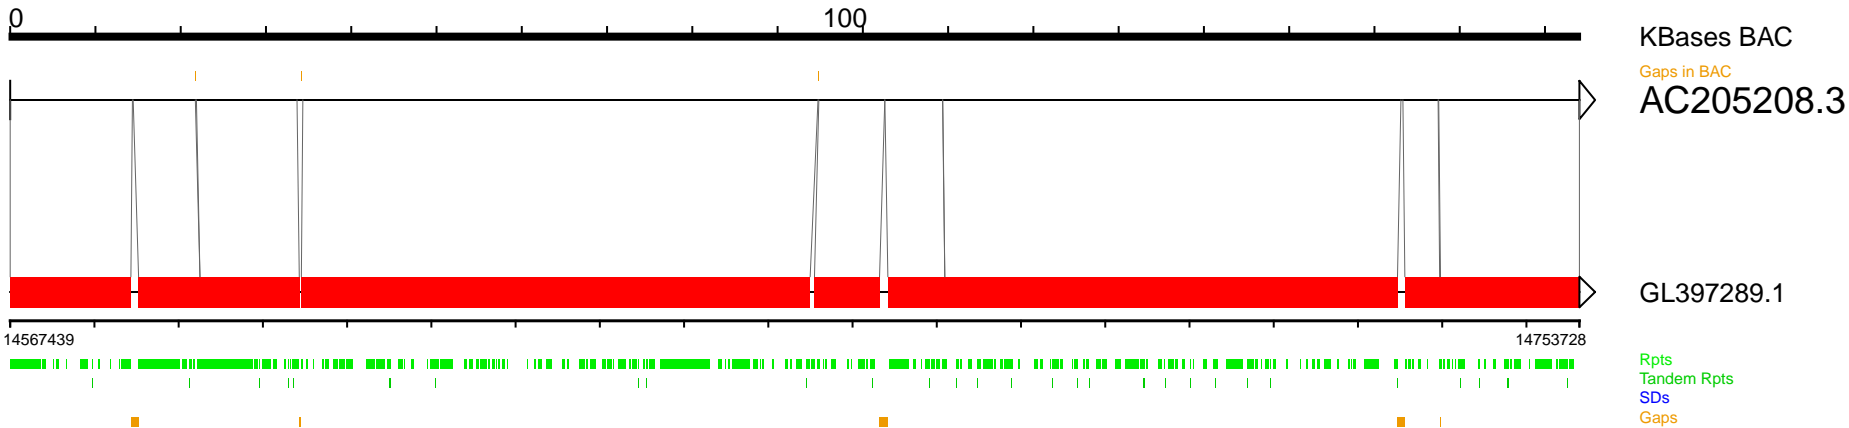

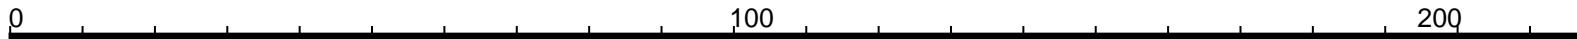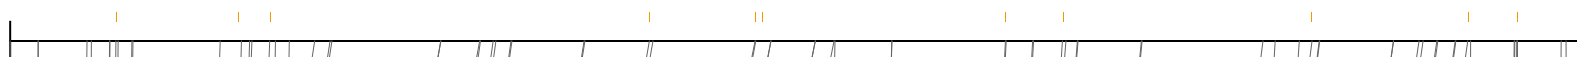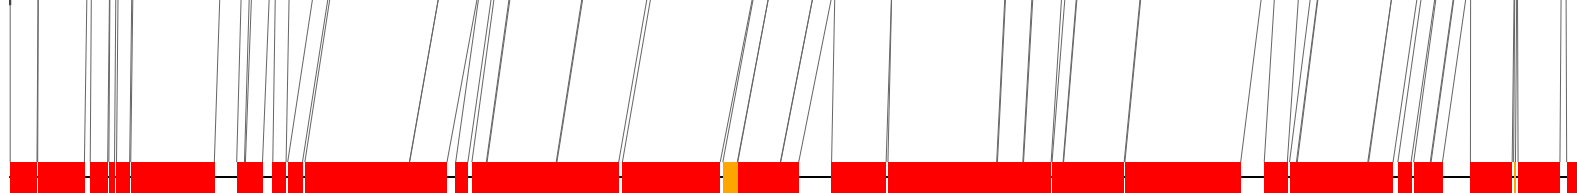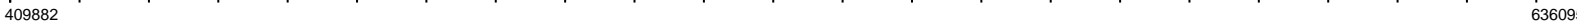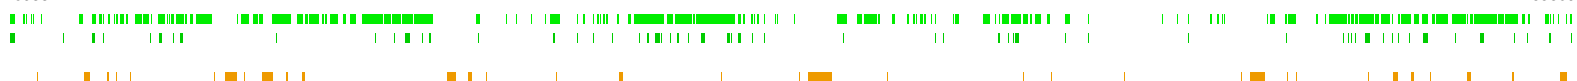

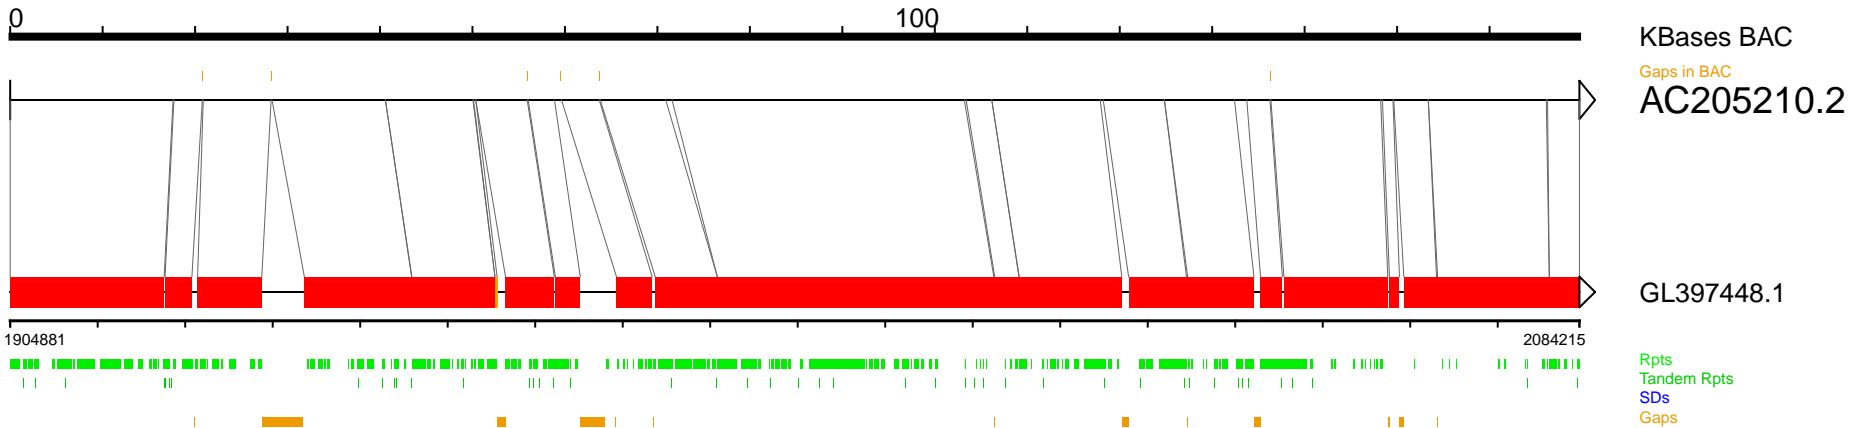

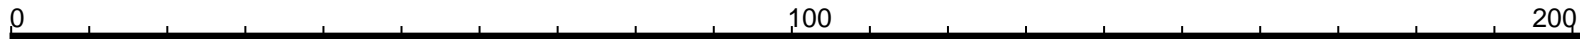

KBases BAC

Gaps in BAC

AC205211.3

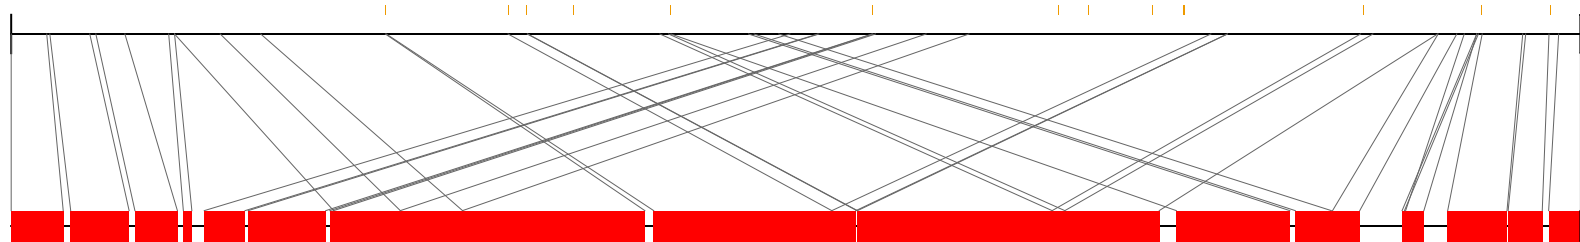

GL397306.1

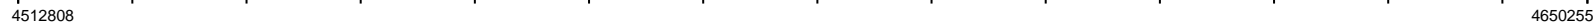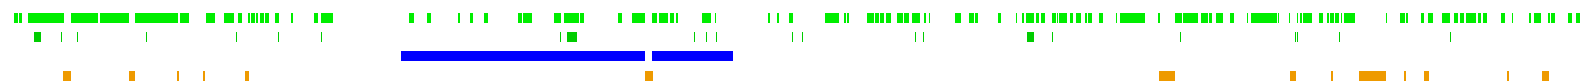

Rpts  
Tandem Rpts  
SDs  
Gaps

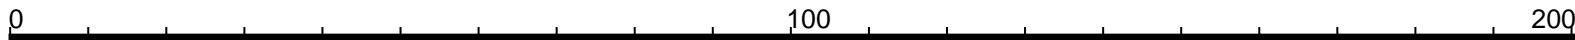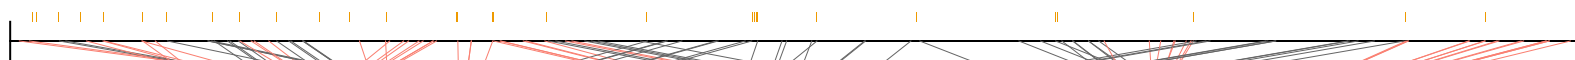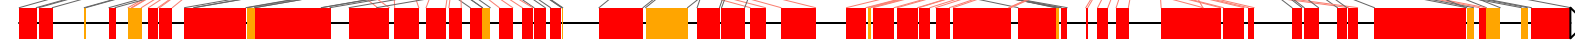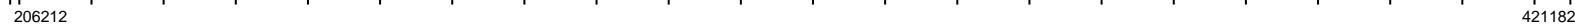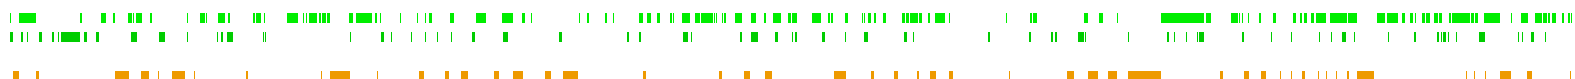

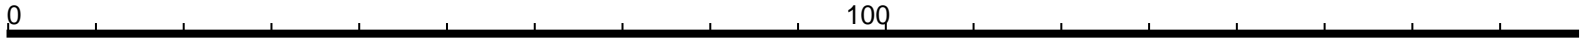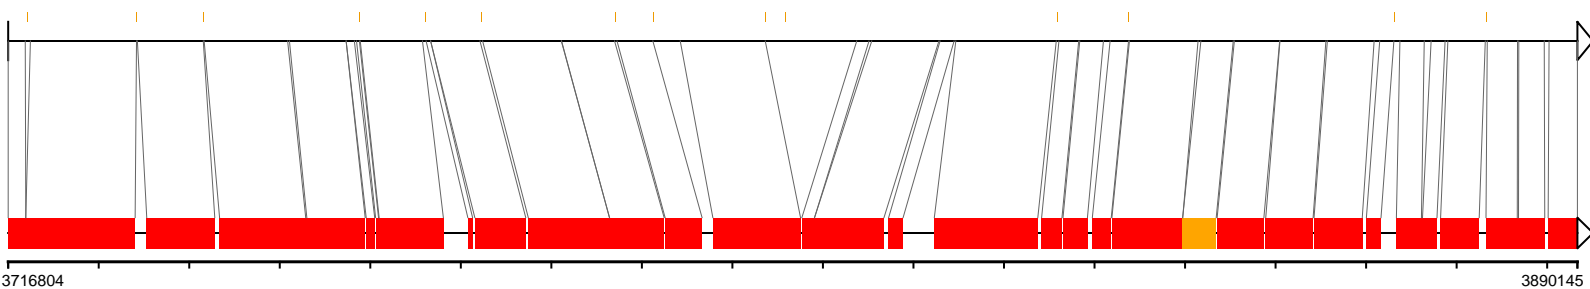

Kbases BAC  
Gaps in BAC  
AC205438.3

GL397272.1

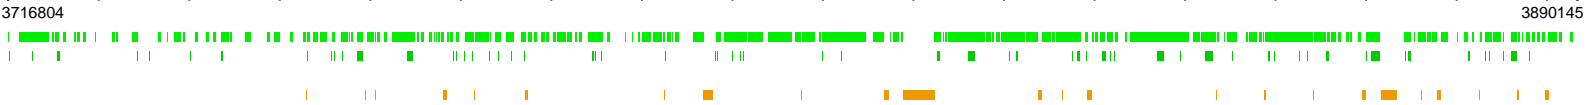

Rpts  
Tandem Rpts  
SDs  
Gaps

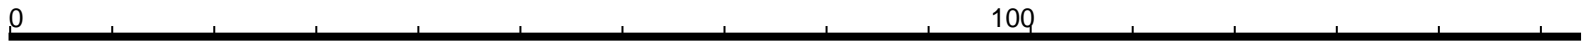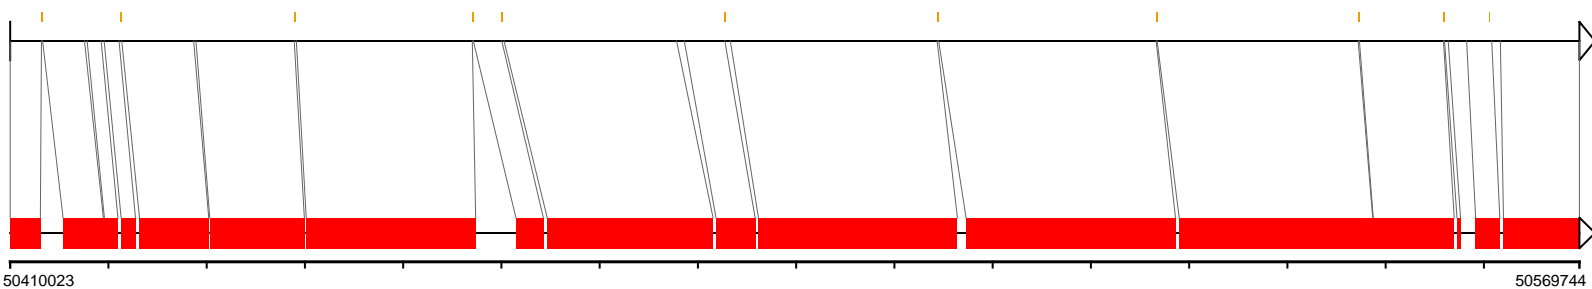

KBases BAC  
AC205439.2

GL397262.1

Rpts  
Tandem Rpts  
SDs  
Gaps

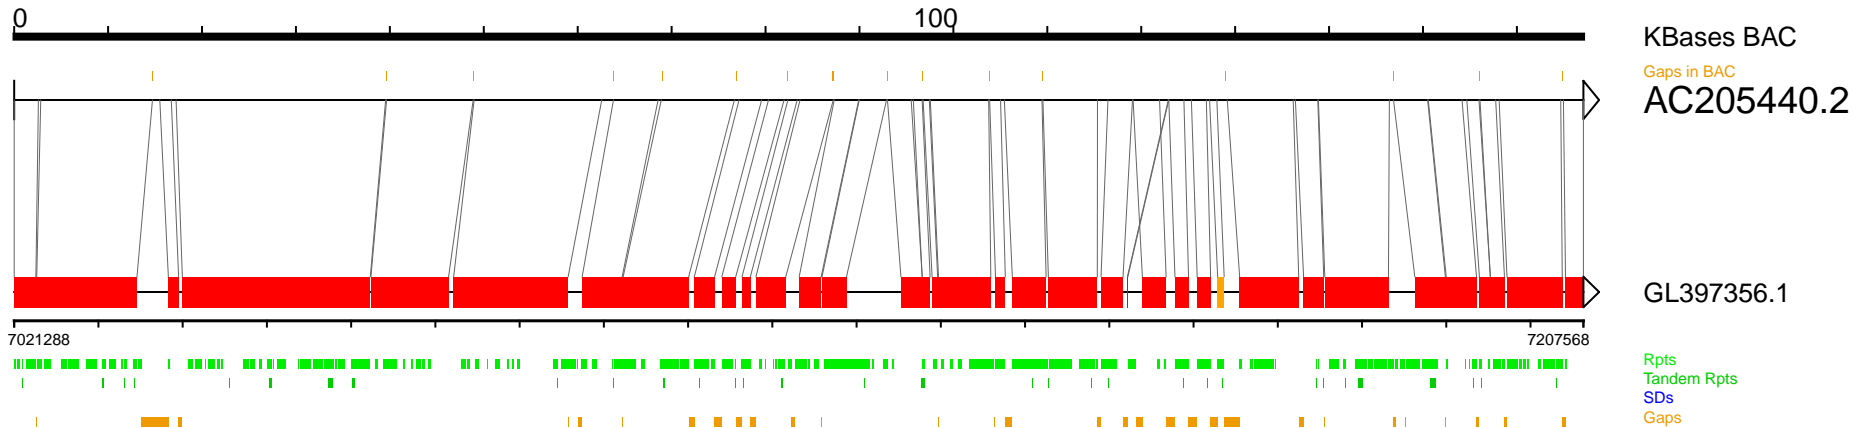

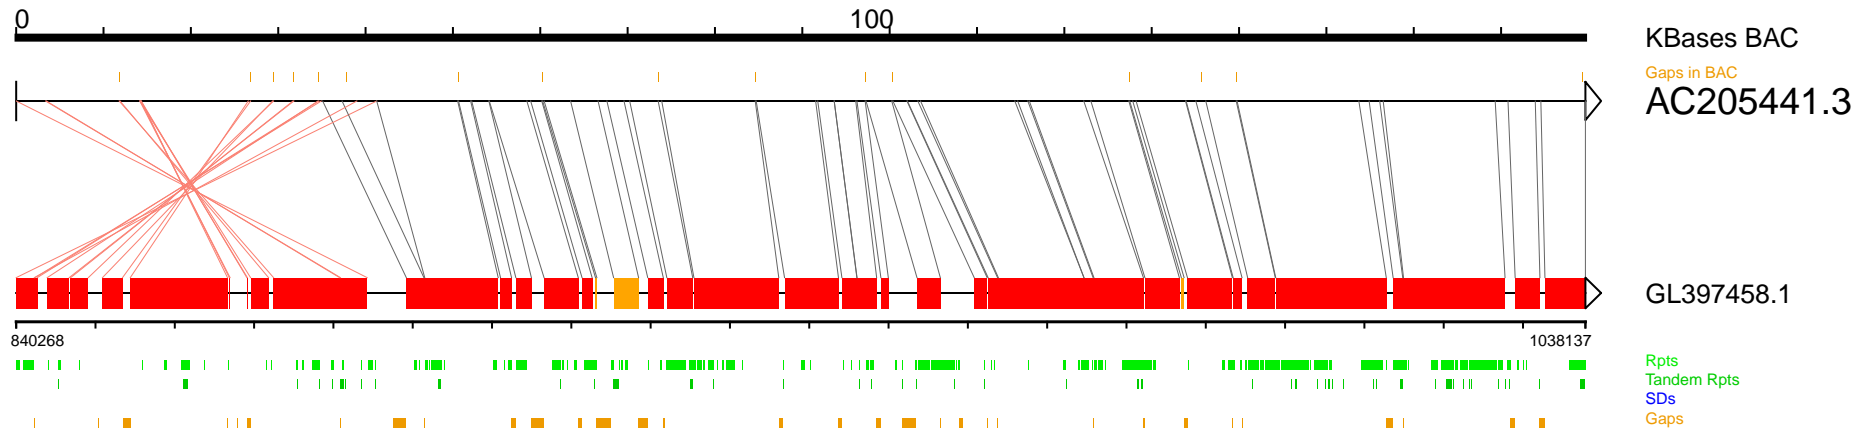

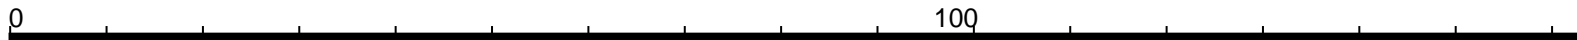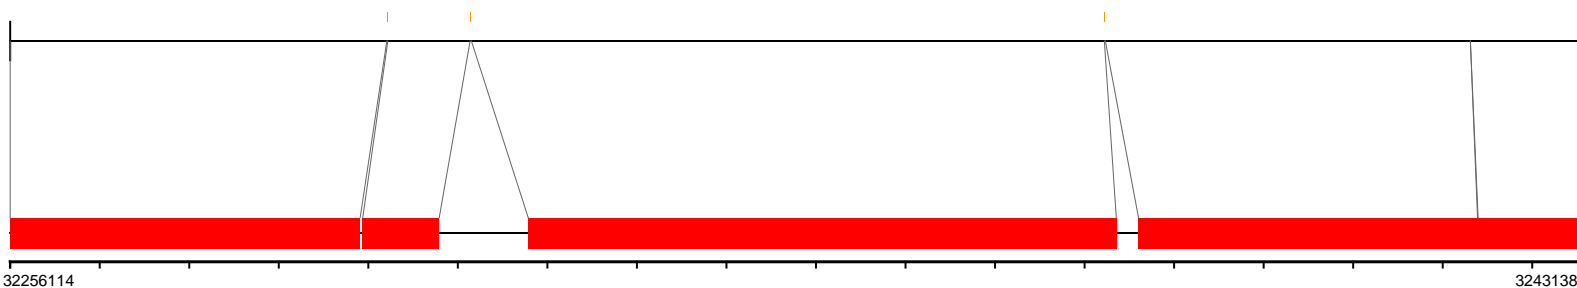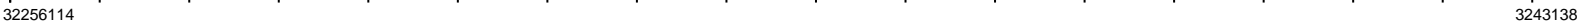

KBases BAC

Gaps in BAC

AC205442.2

GL397267.1

Rpts  
Tandem Rpts  
SDs  
Gaps

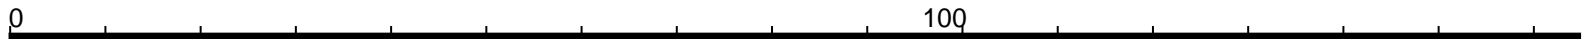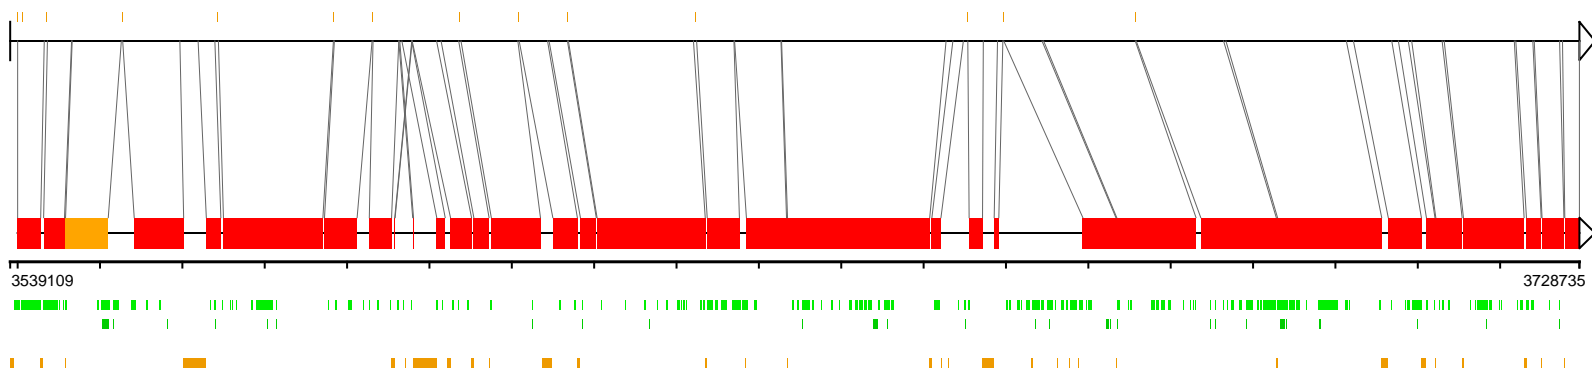

KBases BAC  
AC205443.2

GL397360.1

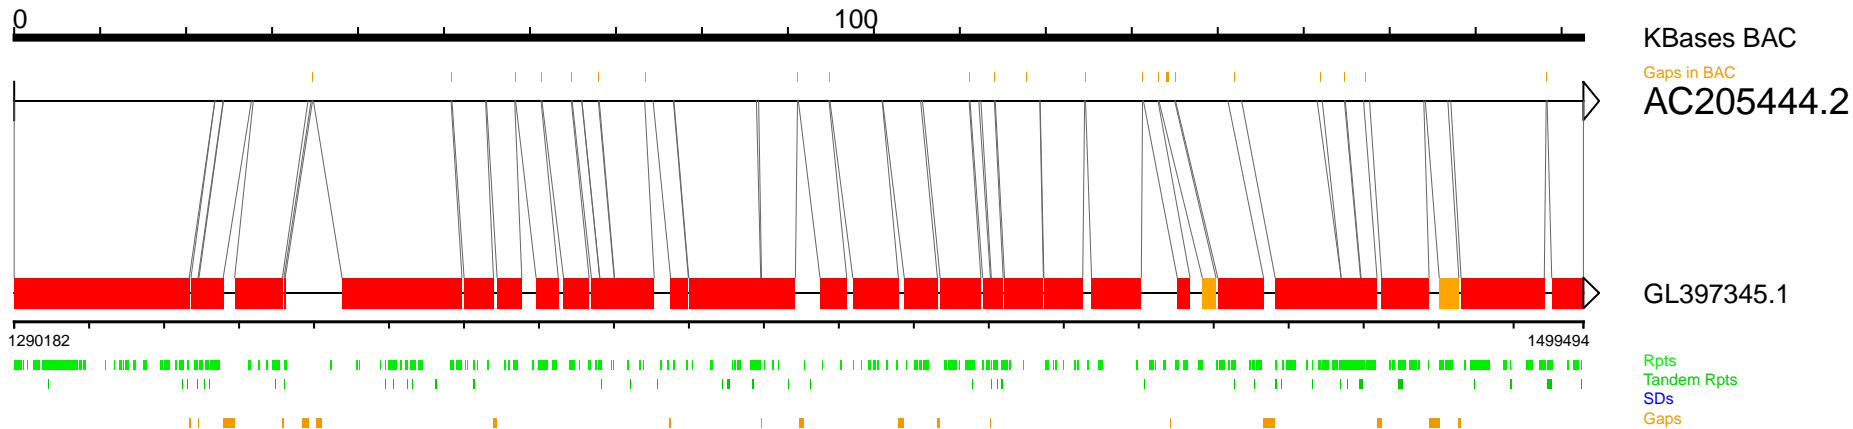

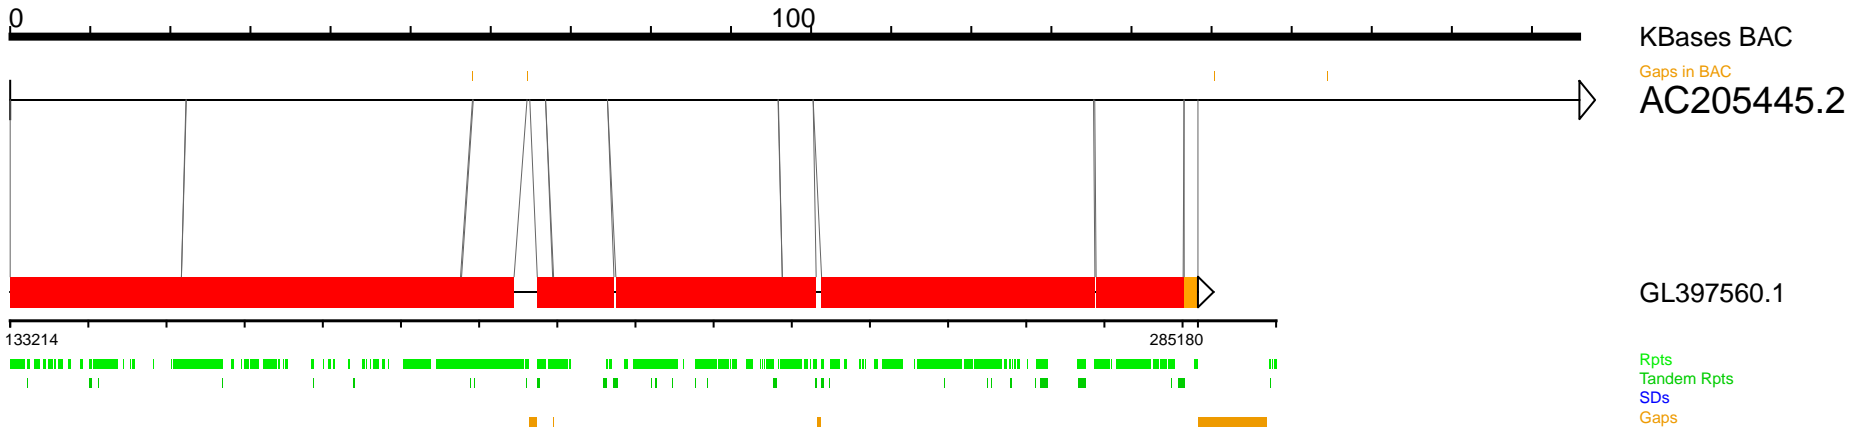

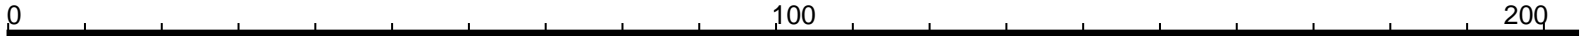

Kbases BAC

Gaps in BAC

AC205446.2

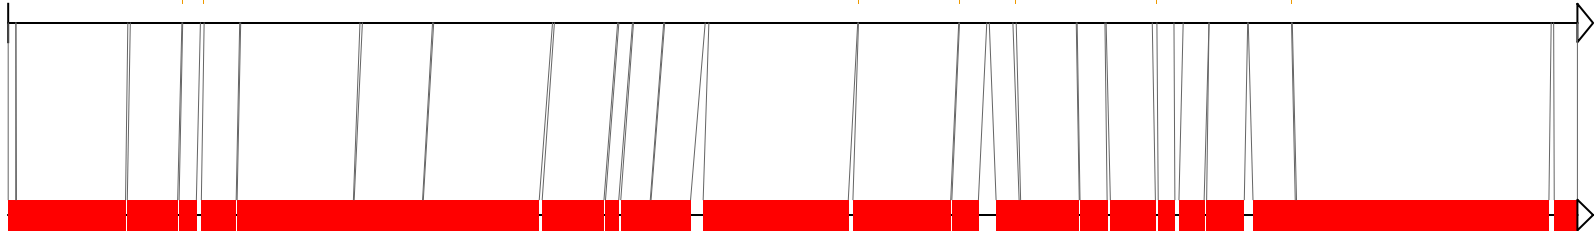

GL397377.1

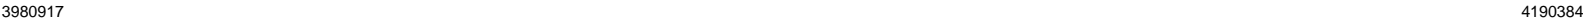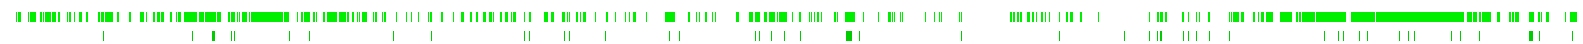

Rpts  
Tandem Rpts  
SDs  
Gaps

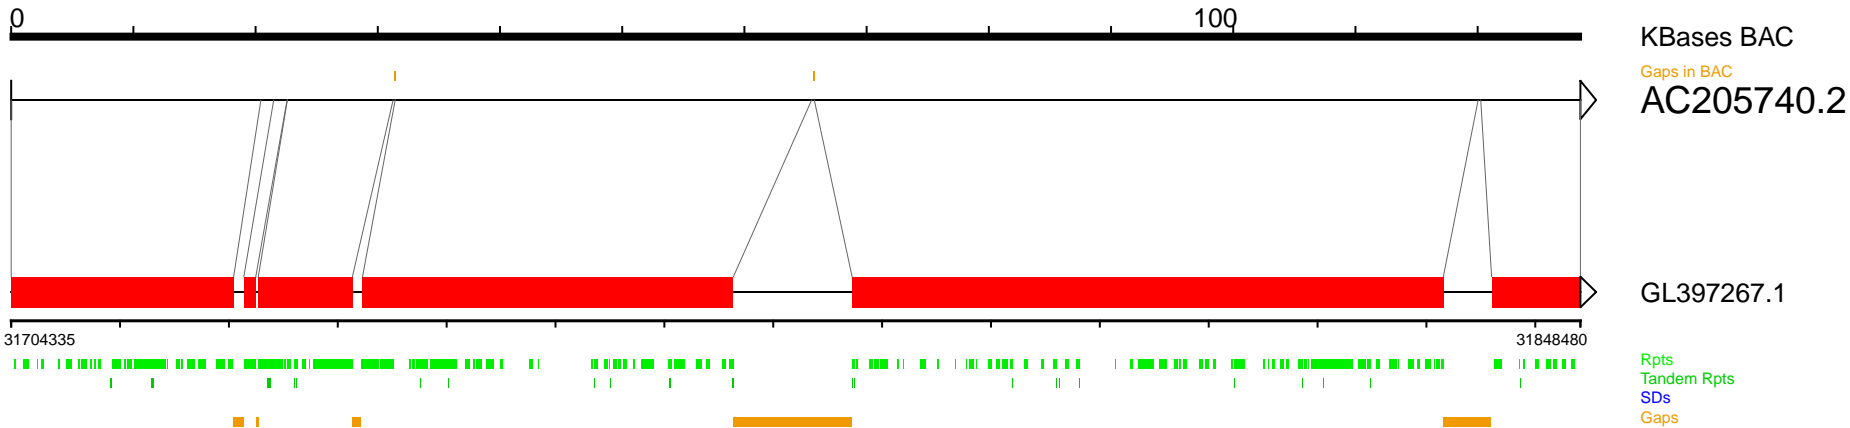

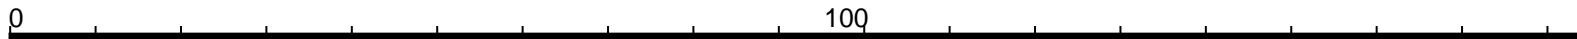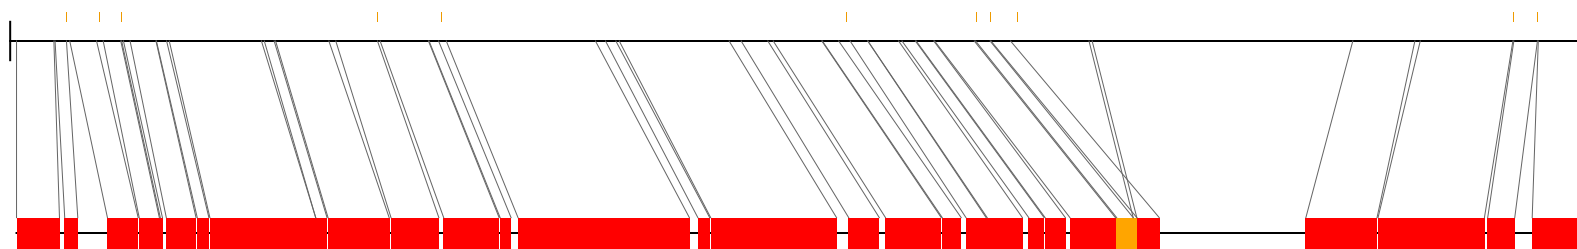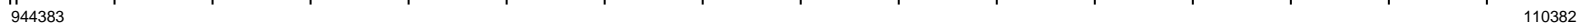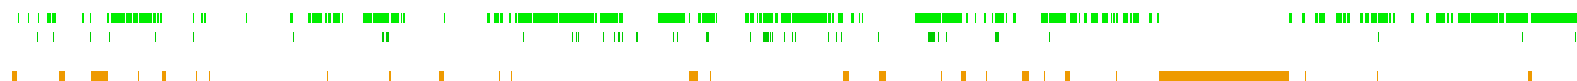

KBases BAC  
AC205741.3

GL397458.1

Rpts  
Tandem Rpts  
SDs  
Gaps

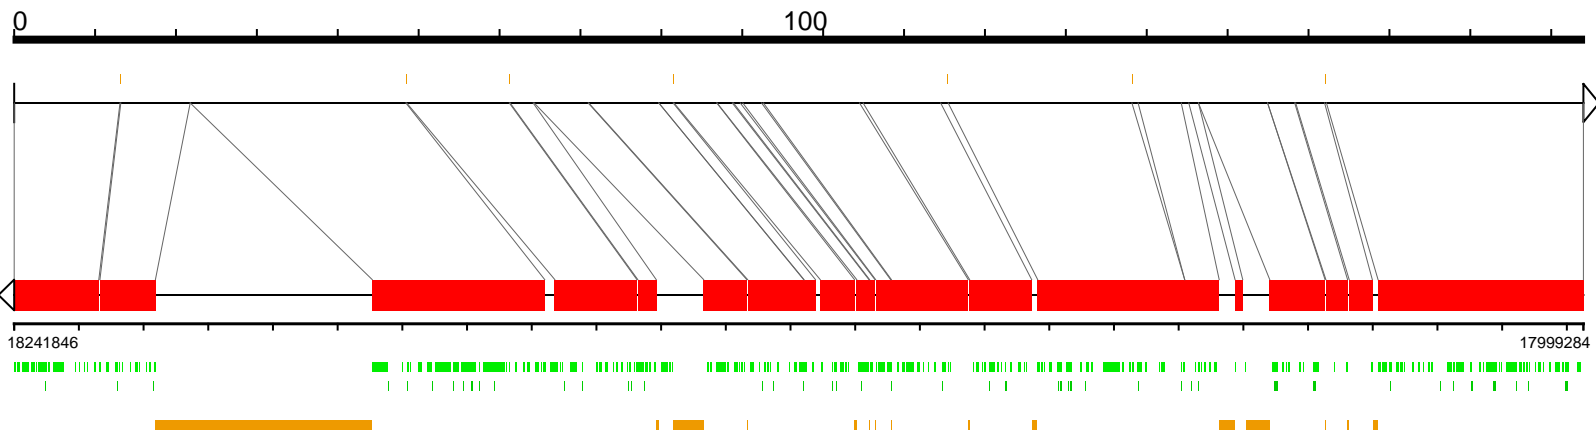

KBases BAC  
Gaps in BAC  
AC205742.2

GL397304.1

Rpts  
Tandem Rpts  
SDs  
Gaps

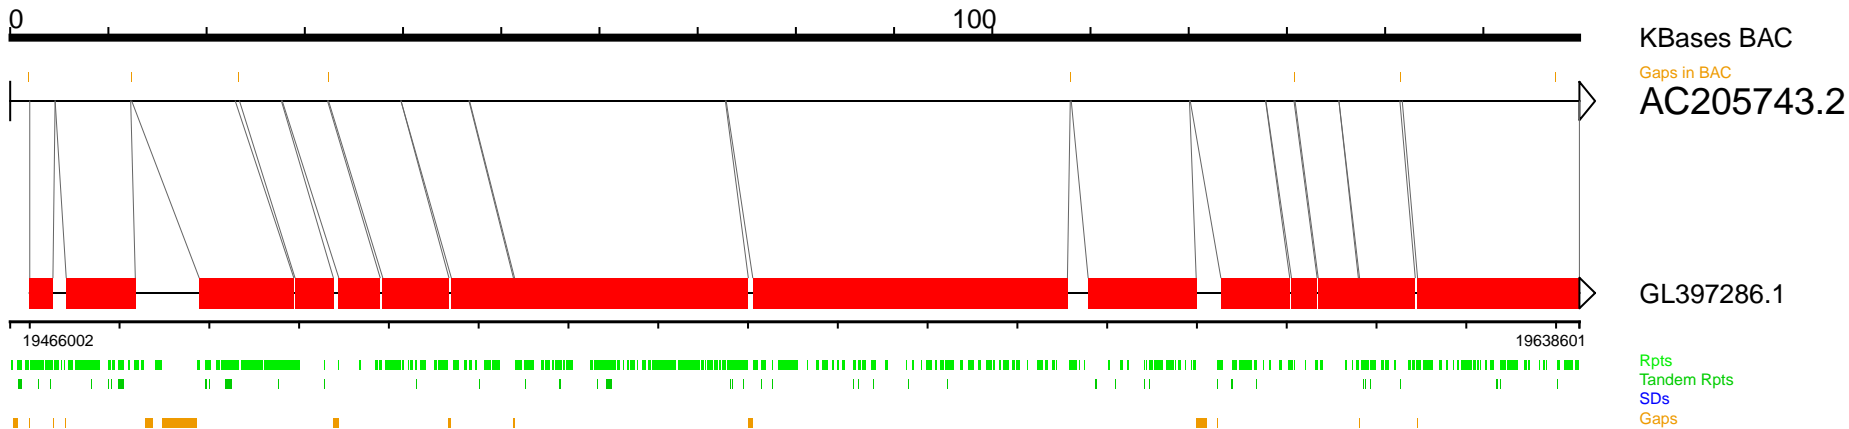

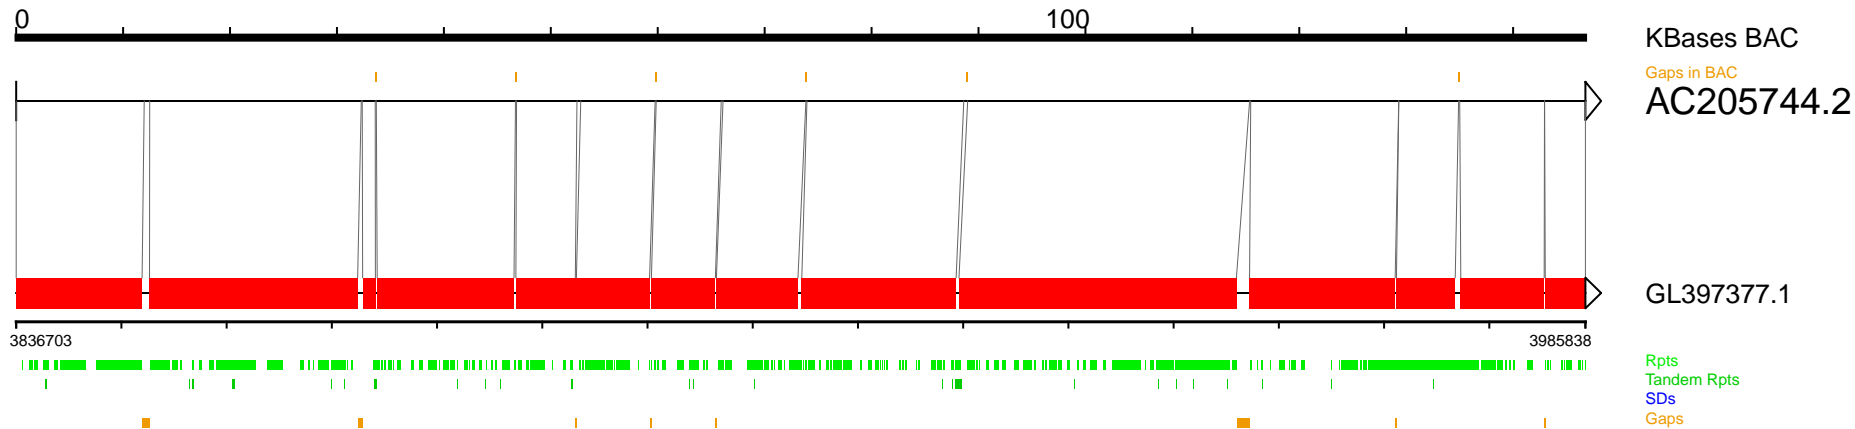

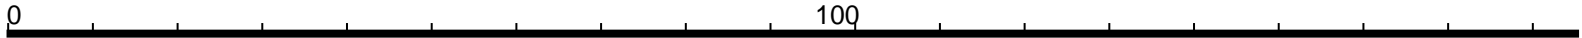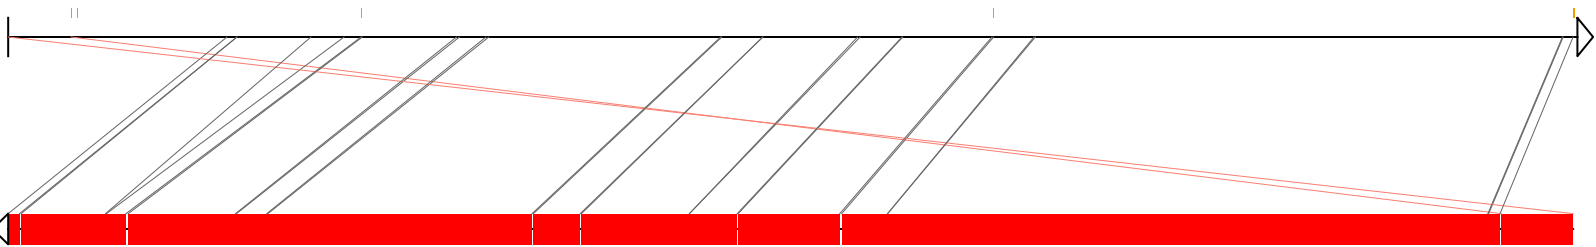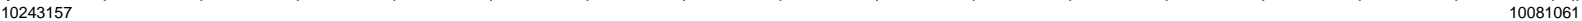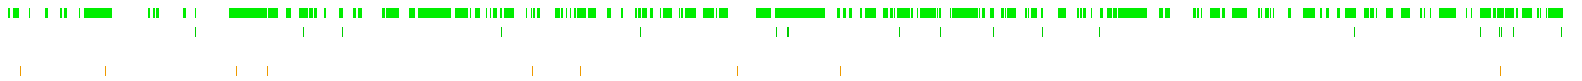

KBases BAC

AC205745.1

GL397277.1

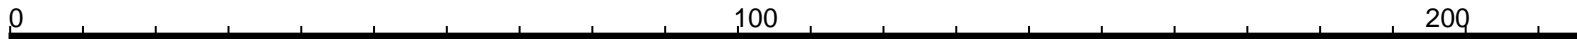

Kbases BAC

Gaps in BAC

AC205746.3

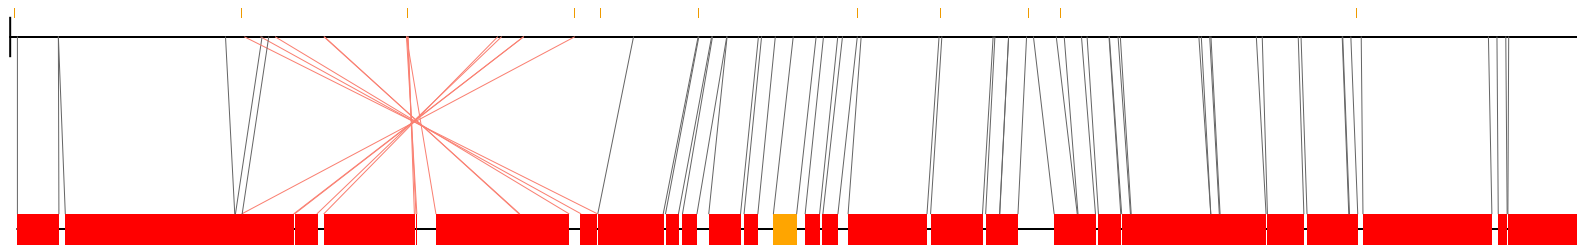

GL397458.1

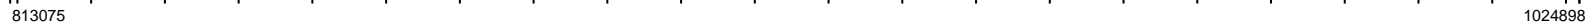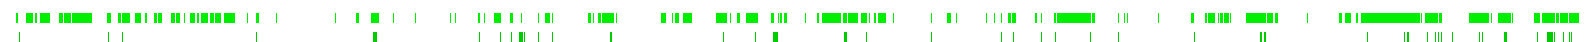

Rpts  
Tandem Rpts  
SDs  
Gaps

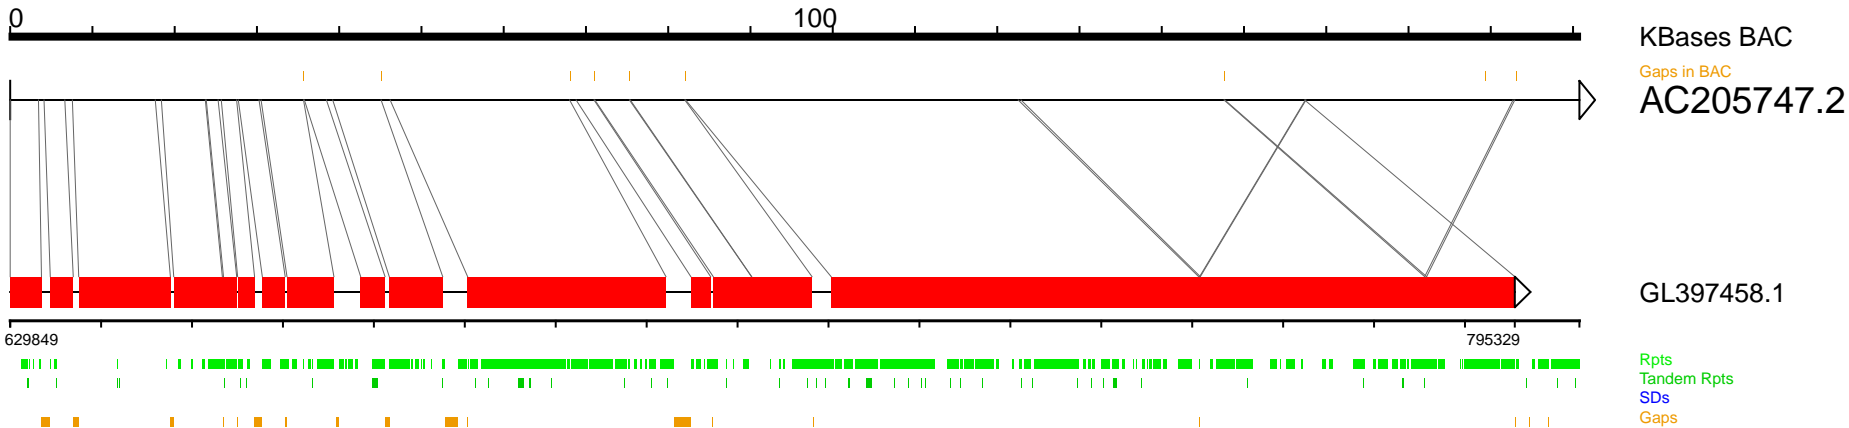

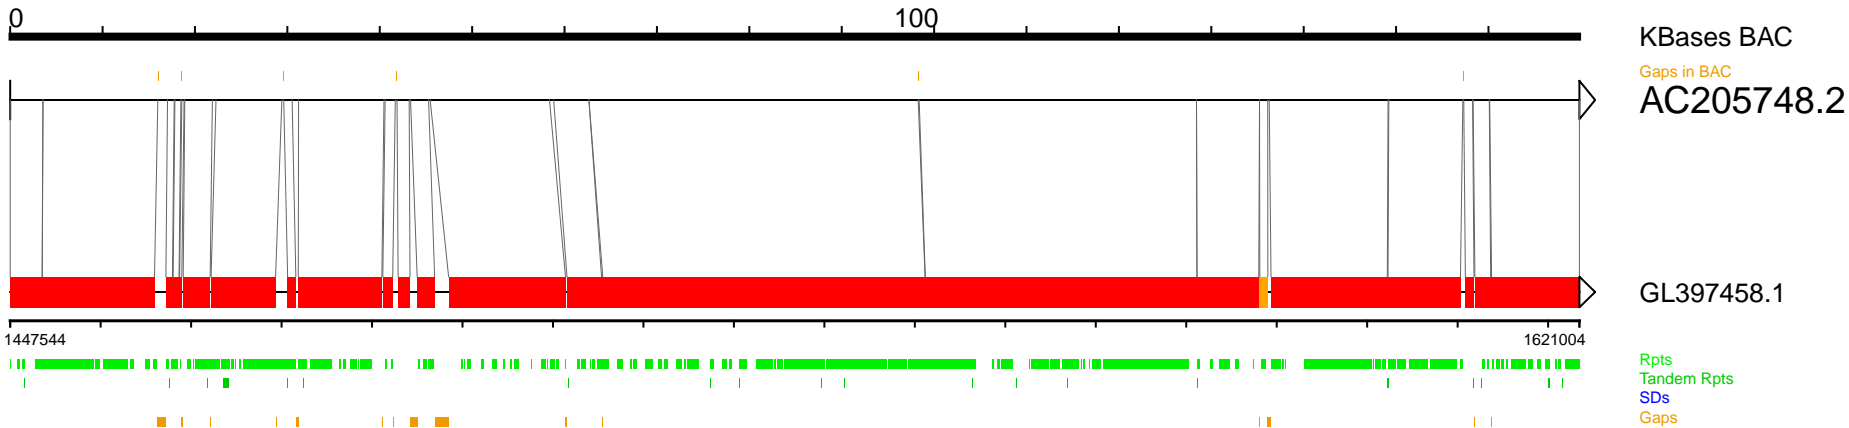

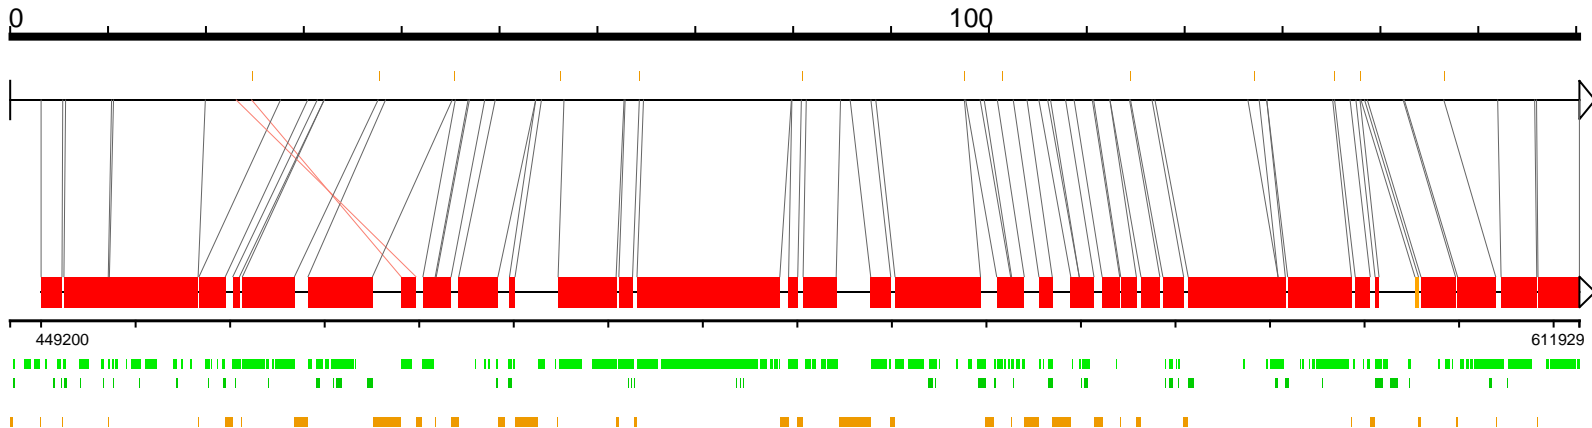

KBases BAC  
AC206072.3

GL397537.1

Rpts  
Tandem Rpts  
SDs  
Gaps

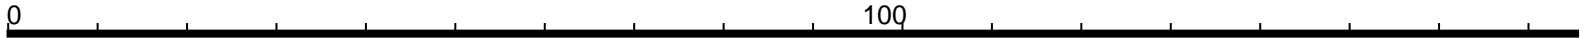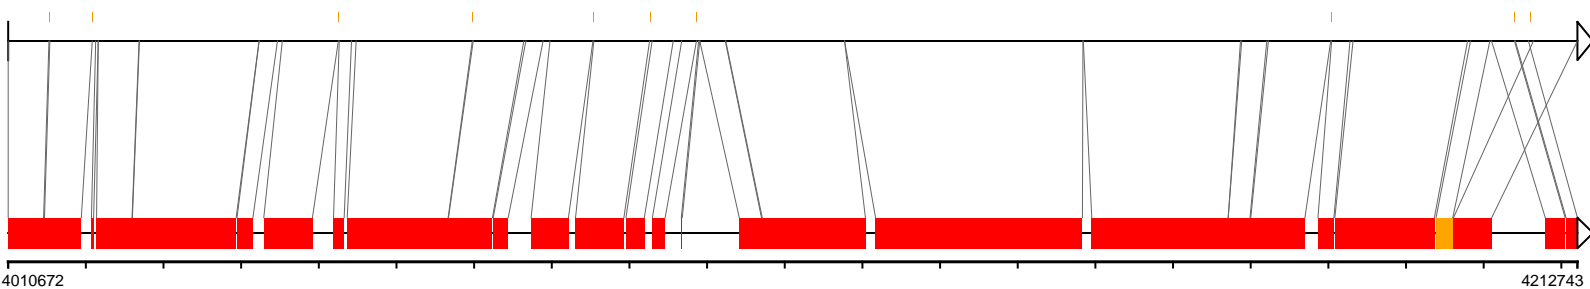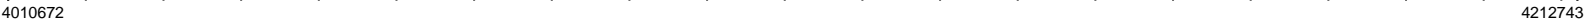

KBases BAC

Gaps in BAC

AC206073.2

GL397272.1

Rpts  
Tandem Rpts  
SDs  
Gaps

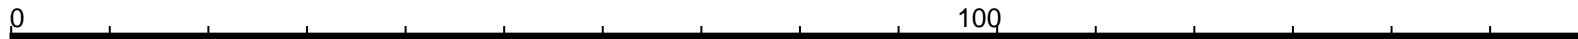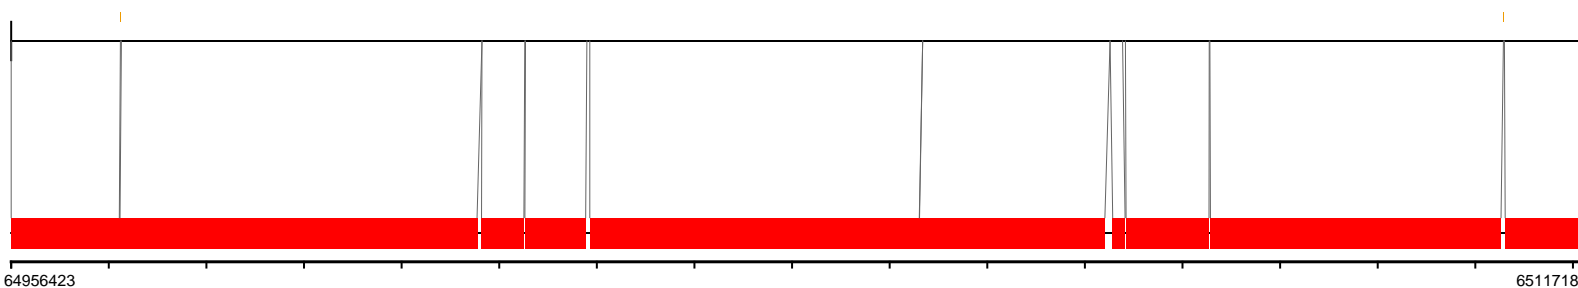

KBases BAC

Gaps in BAC

AC206074.2

GL397262.1

Rpts  
Tandem Rpts  
SDs  
Gaps

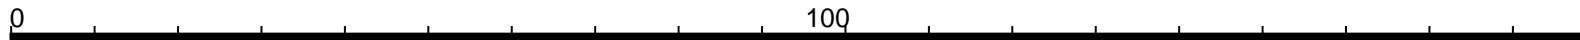

KBases BAC  
AC206075.2

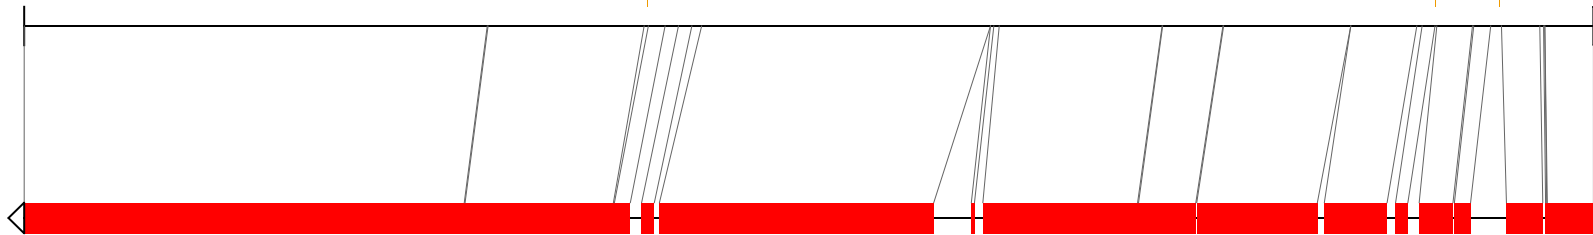

GL397283.1

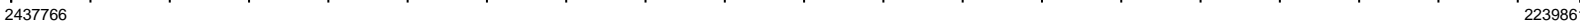

Rpts  
Tandem Rpts  
SDs  
Gaps

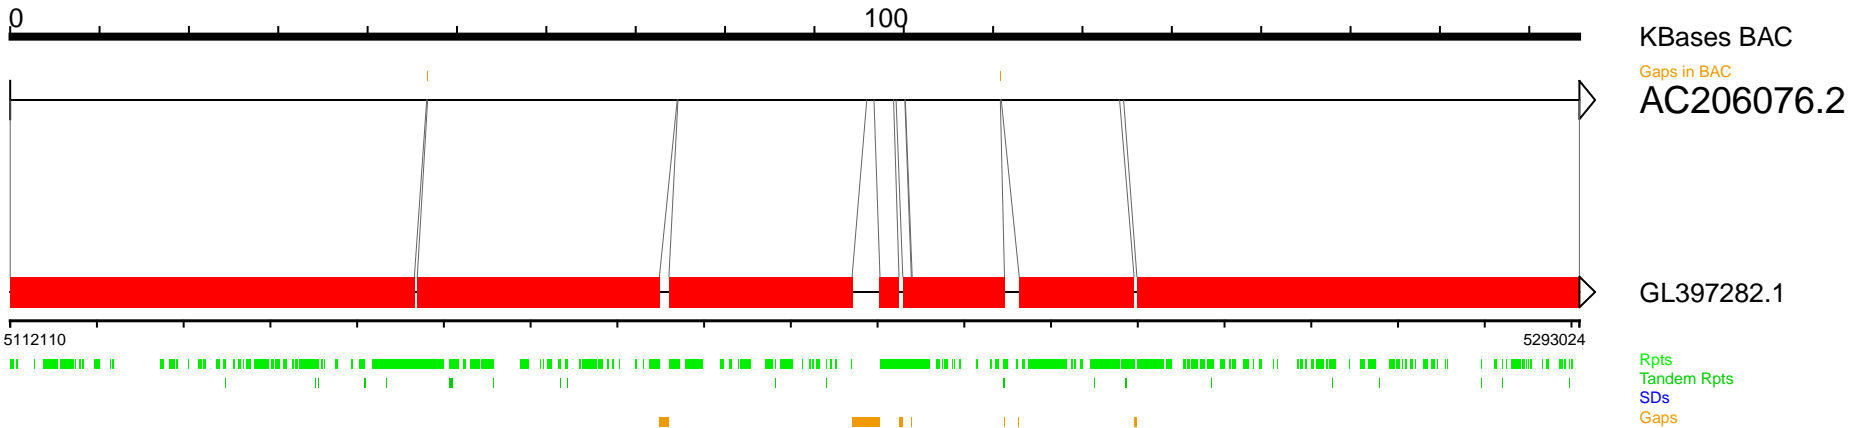

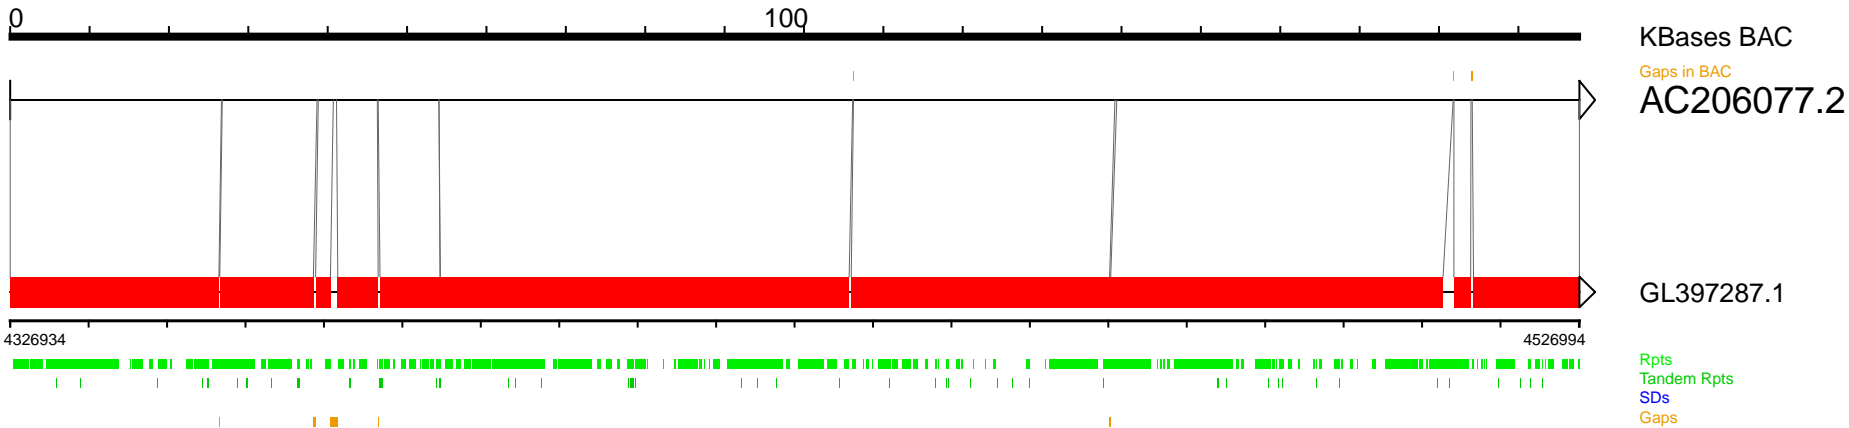

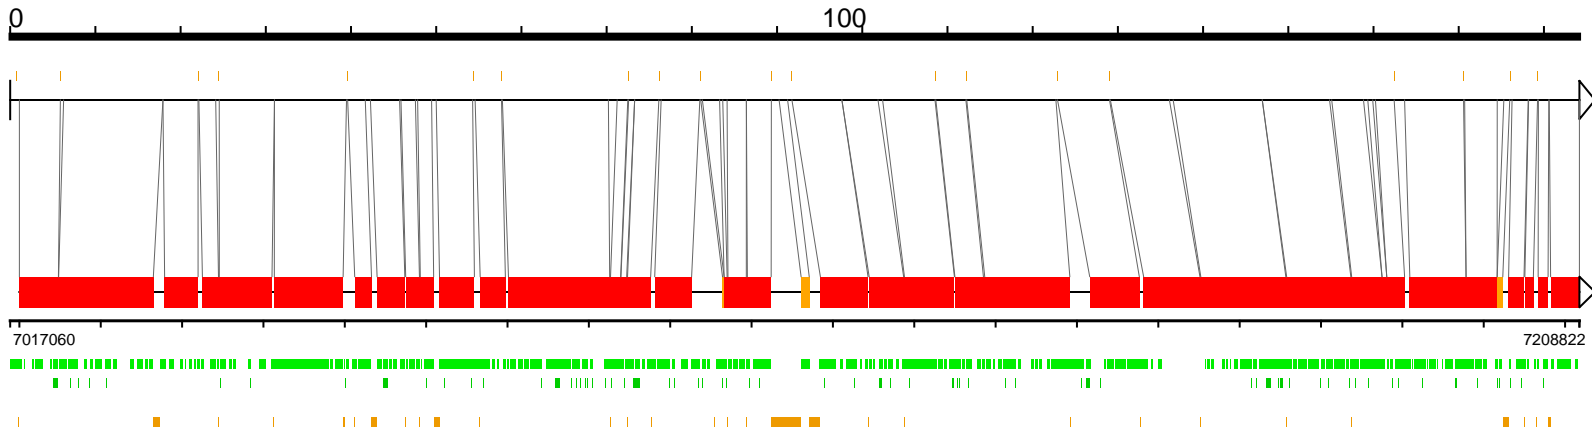

KBases BAC  
AC206078.3

GL397334.1

Rpts  
Tandem Rpts  
SDs  
Gaps

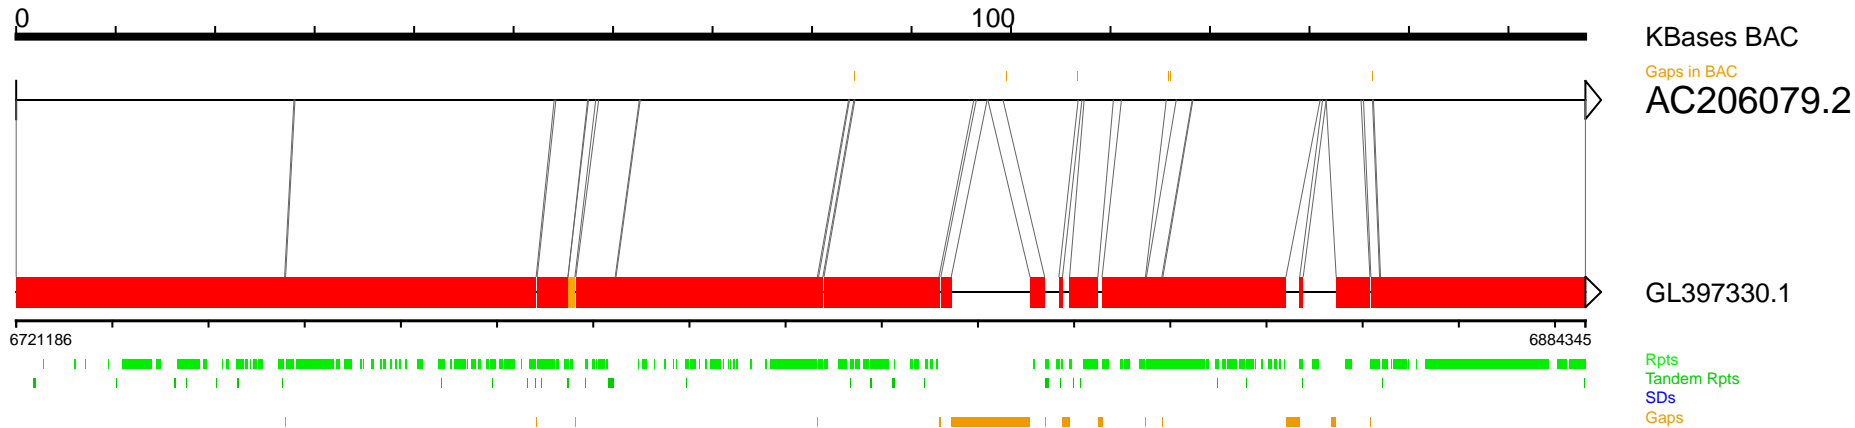

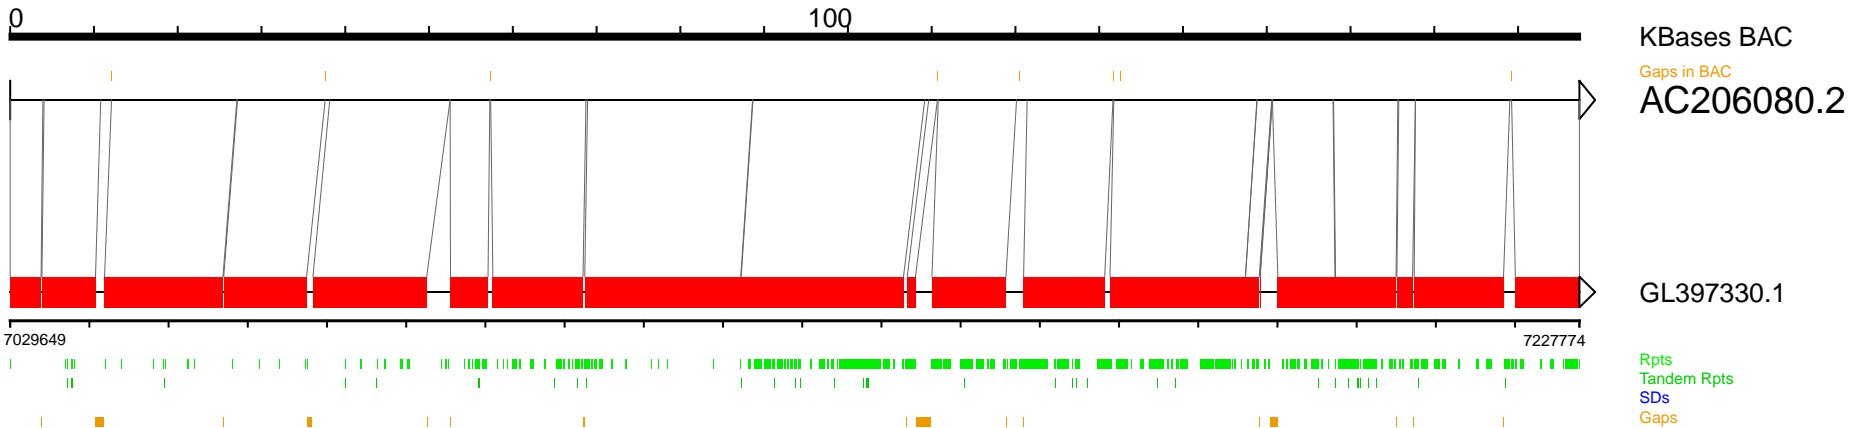

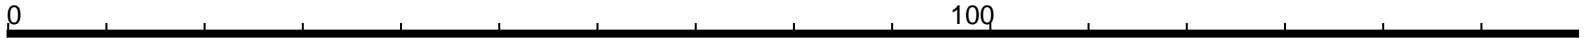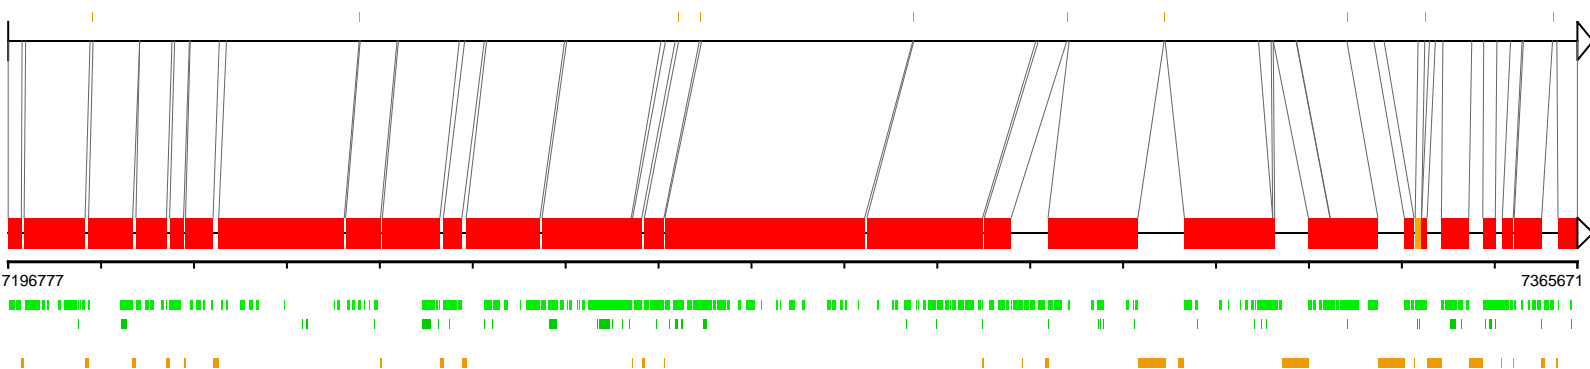

KBases BAC  
AC206377.2

GL397356.1

Rpts  
Tandem Rpts  
SDs  
Gaps

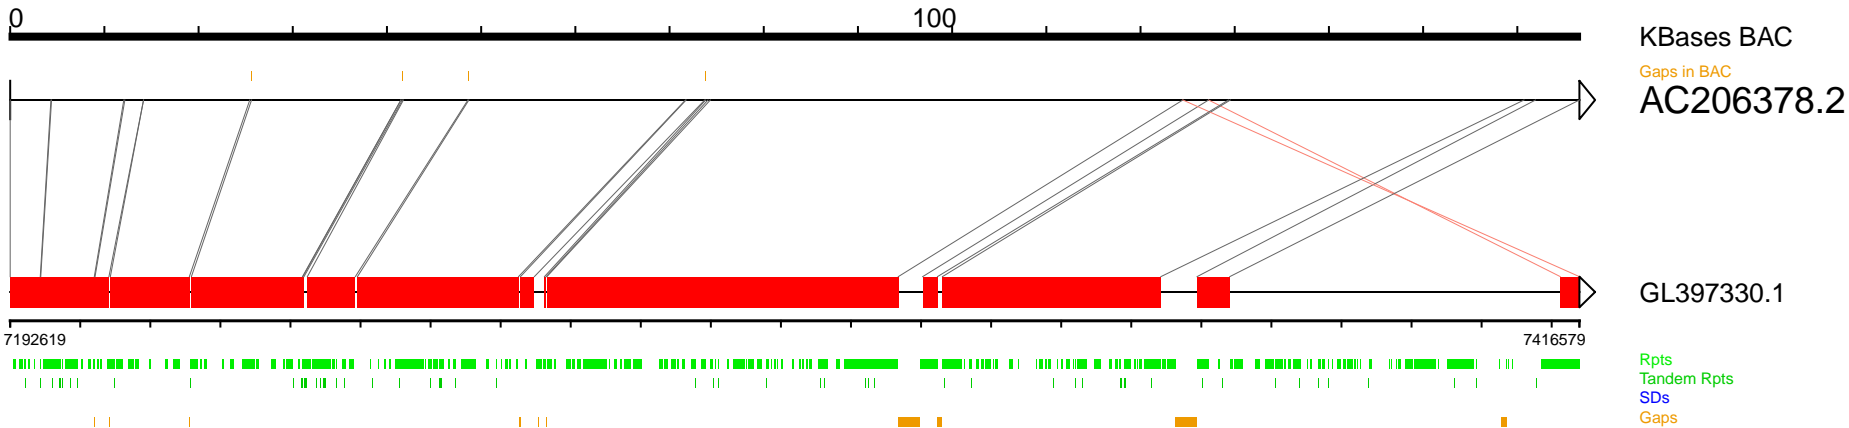

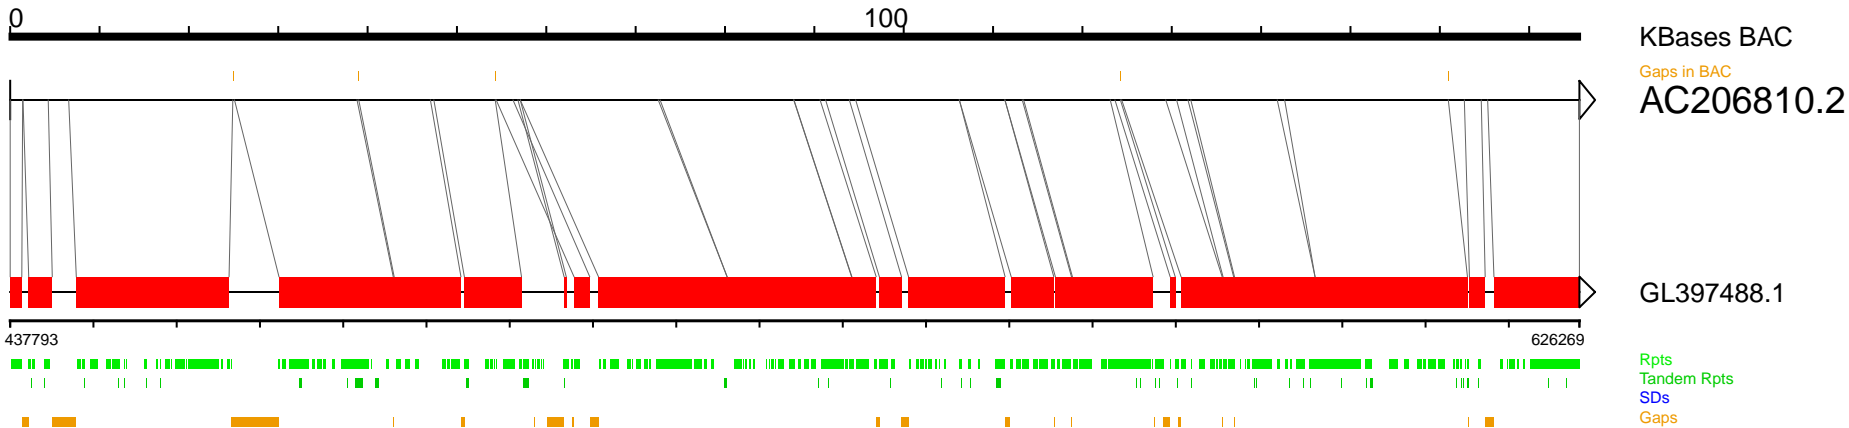

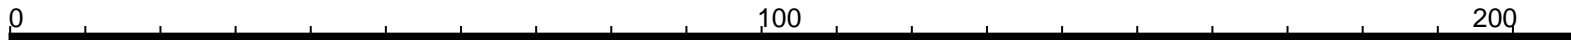

Kbases BAC

Gaps in BAC

AC206811.2

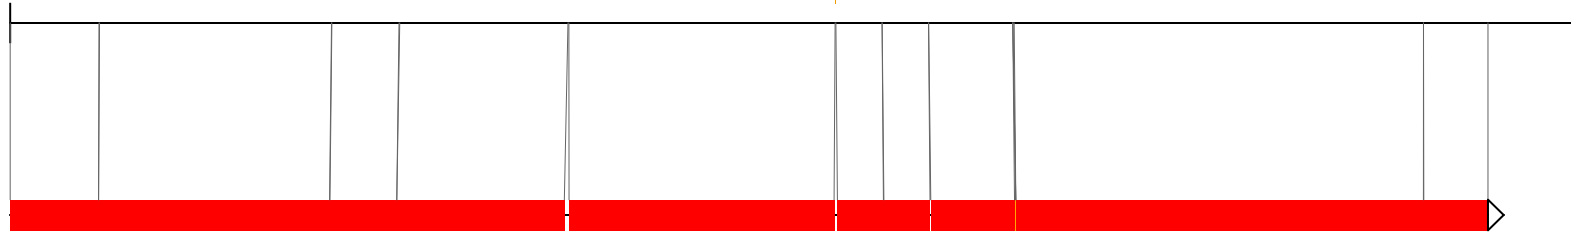

GL397393.1

3763568

3961071

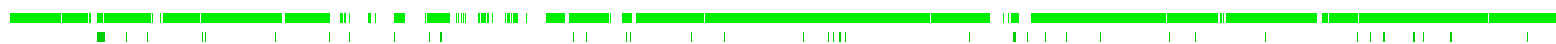

Rpts  
Tandem Rpts  
SDs  
Gaps

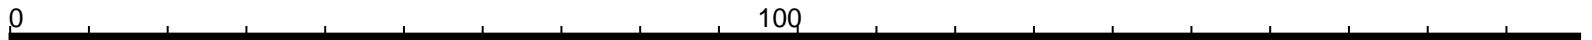

KBases BAC  
AC206812.2

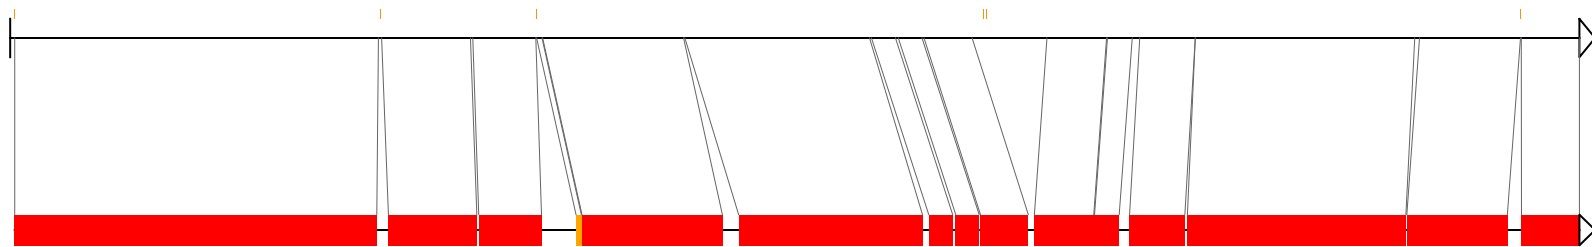

GL397277.1

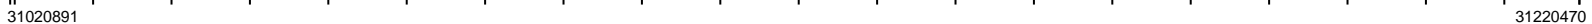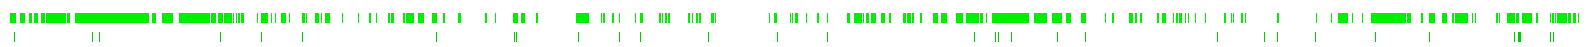

Rpts  
Tandem Rpts  
SDs  
Gaps

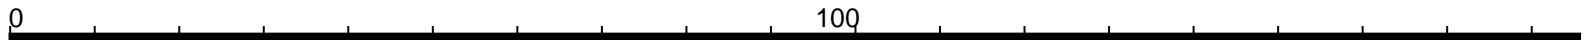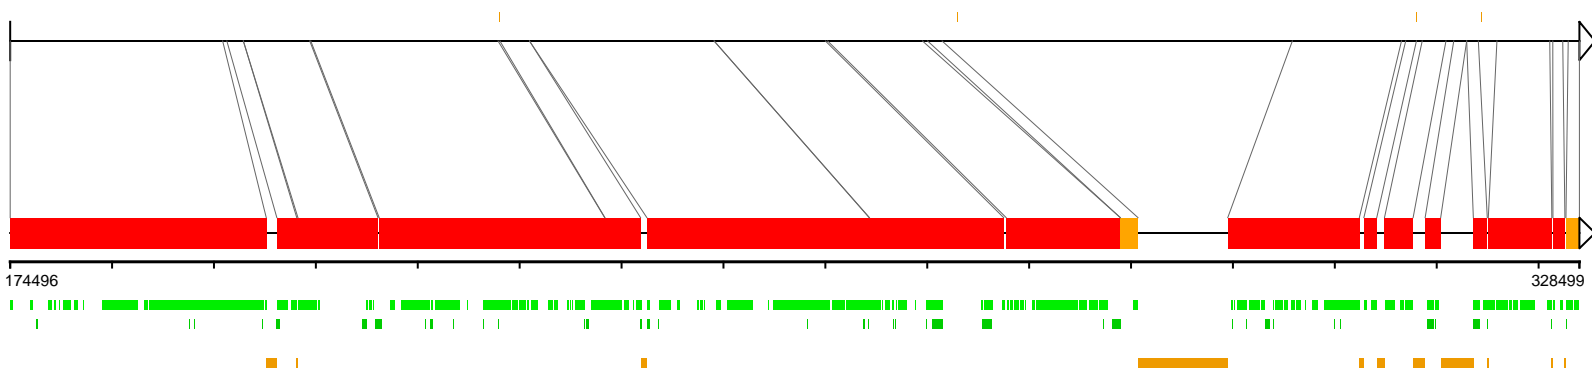

KBases BAC  
AC207148.3

GL397560.1

Rpts  
Tandem Rpts  
SDs  
Gaps

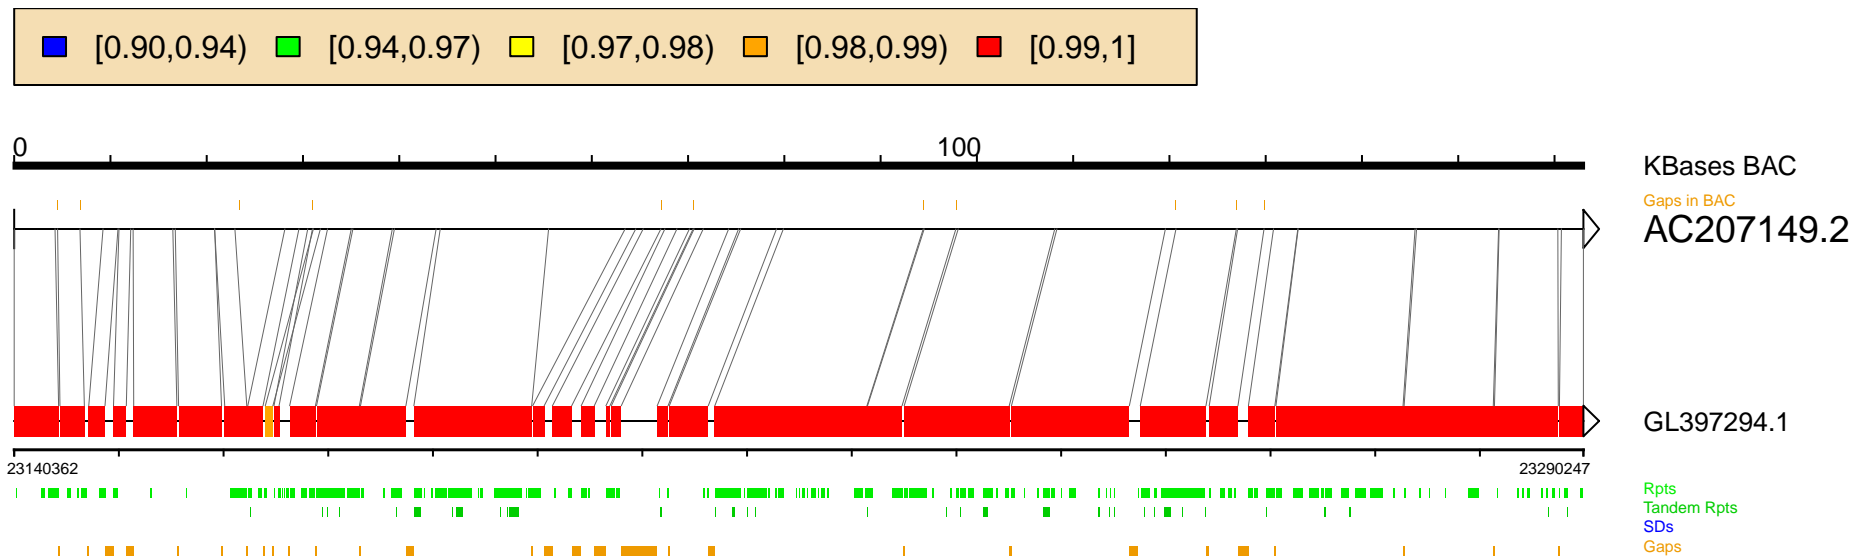

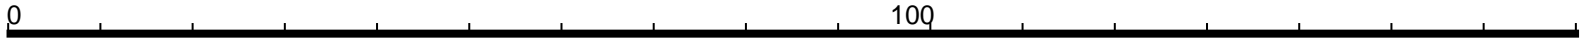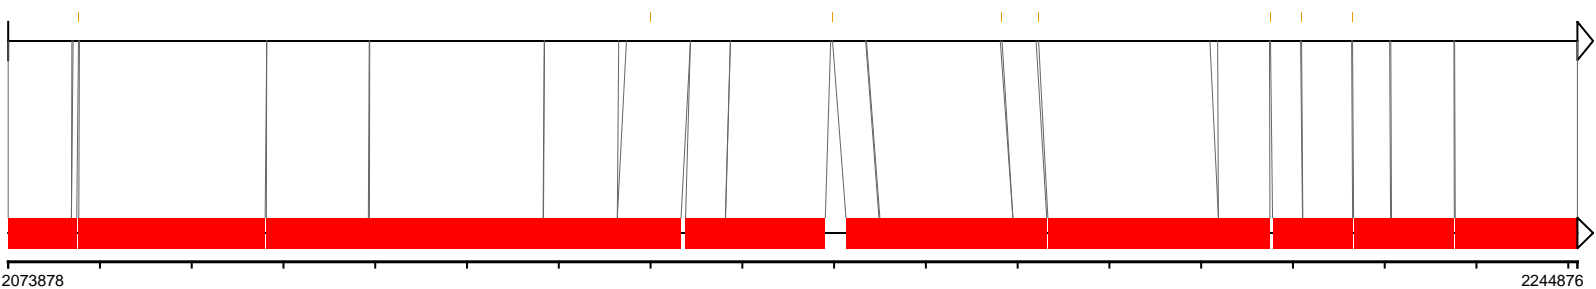

KBases BAC  
AC207150.2

GL397448.1

Rpts  
Tandem Rpts  
SDs  
Gaps

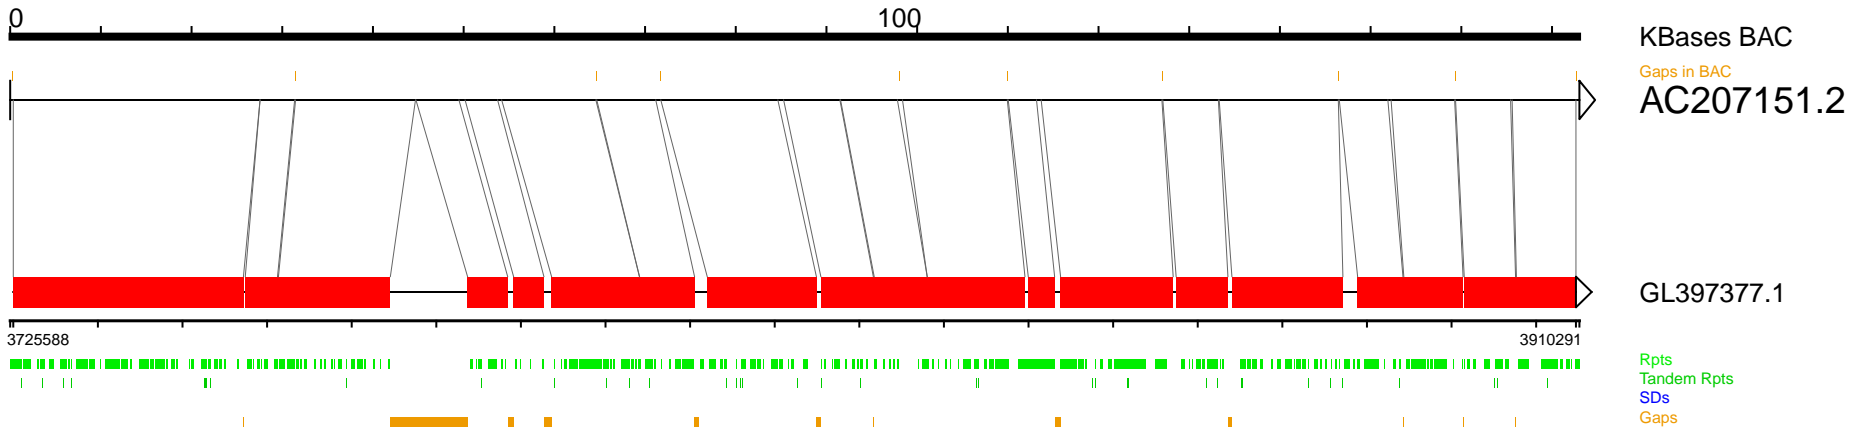

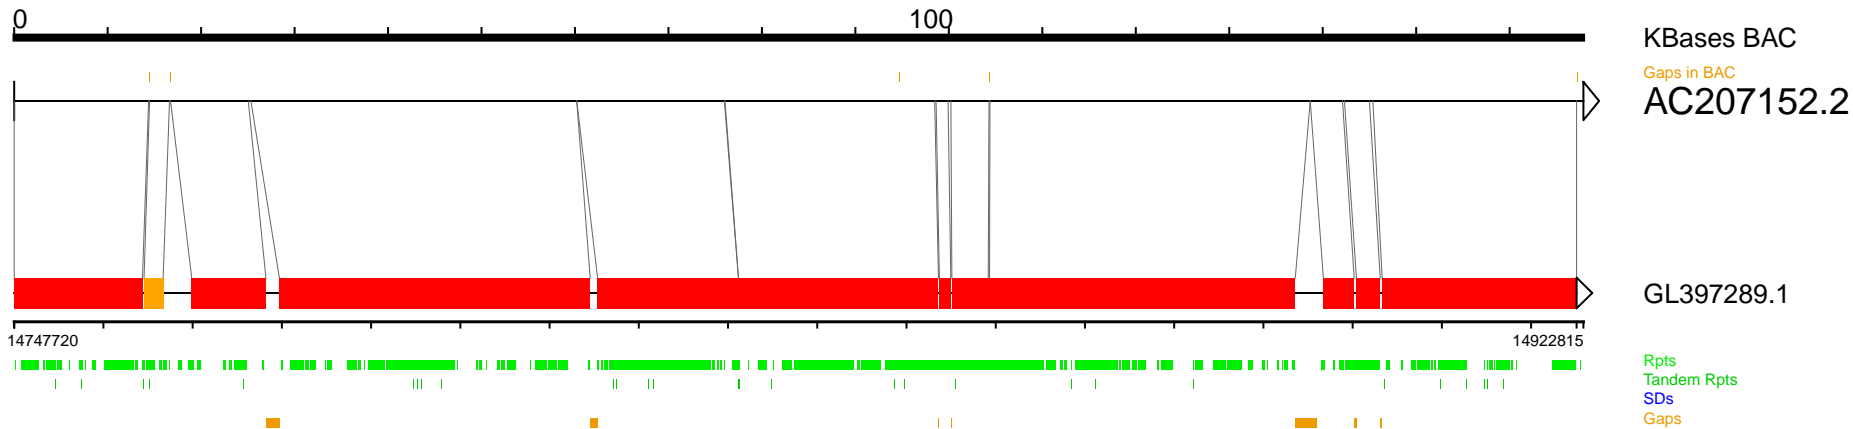

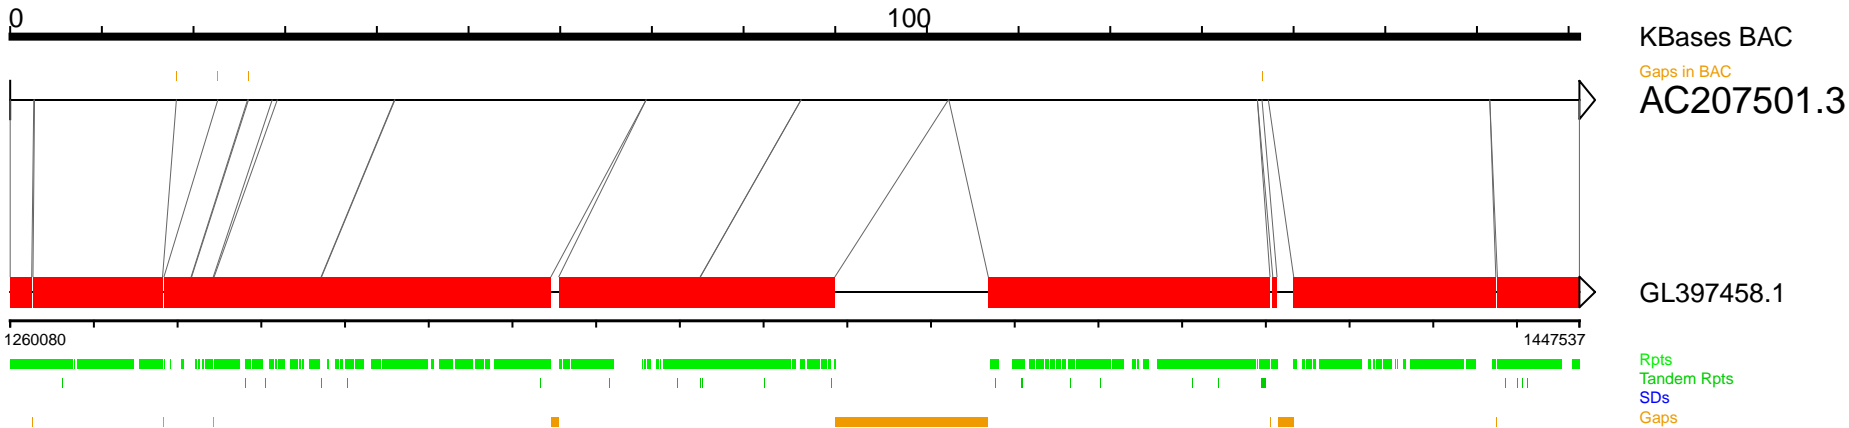

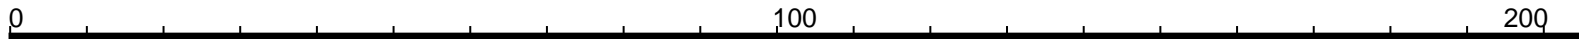

KBases BAC

Gaps in BAC

AC207502.2

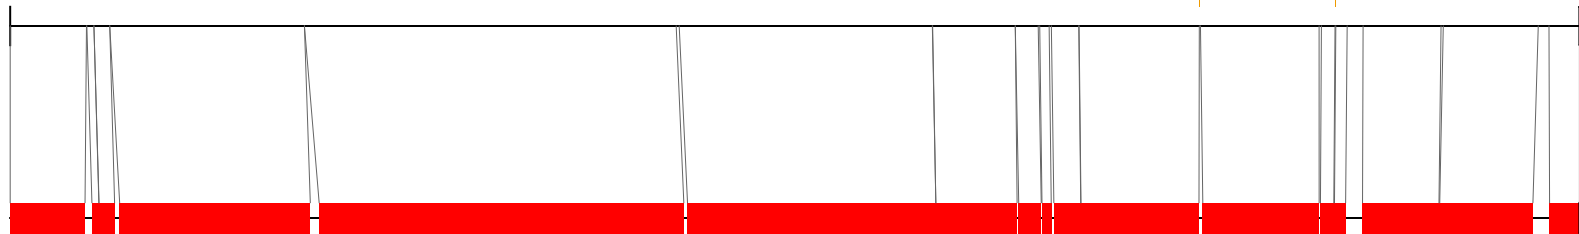

GL397488.1

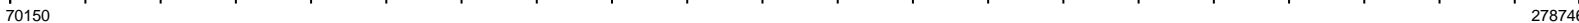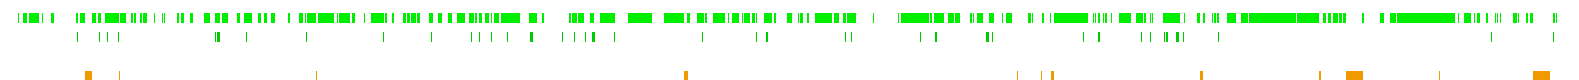

Rpts  
Tandem Rpts  
SDs  
Gaps

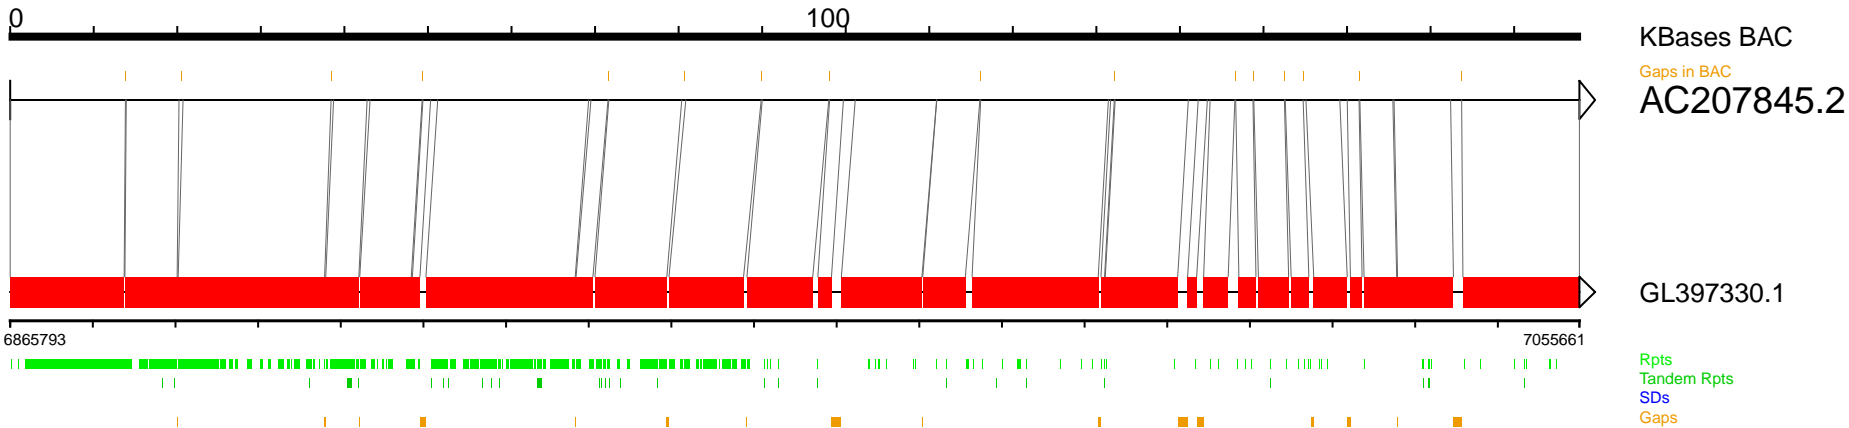

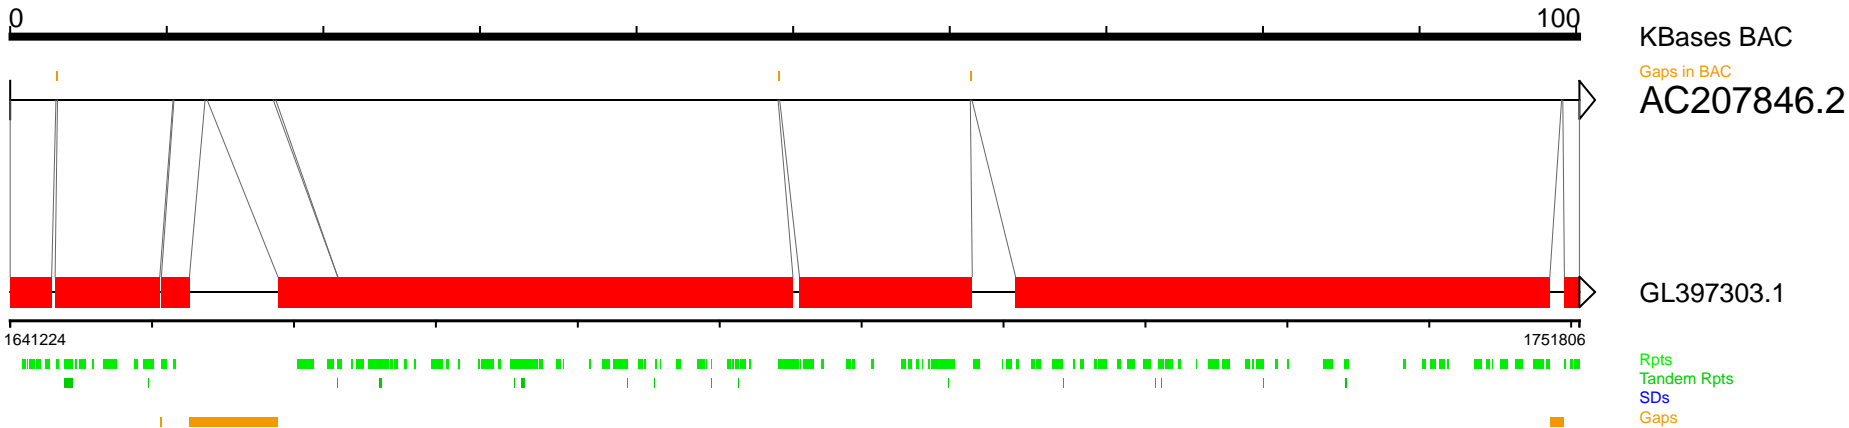

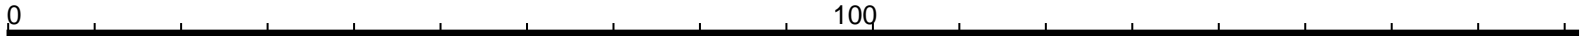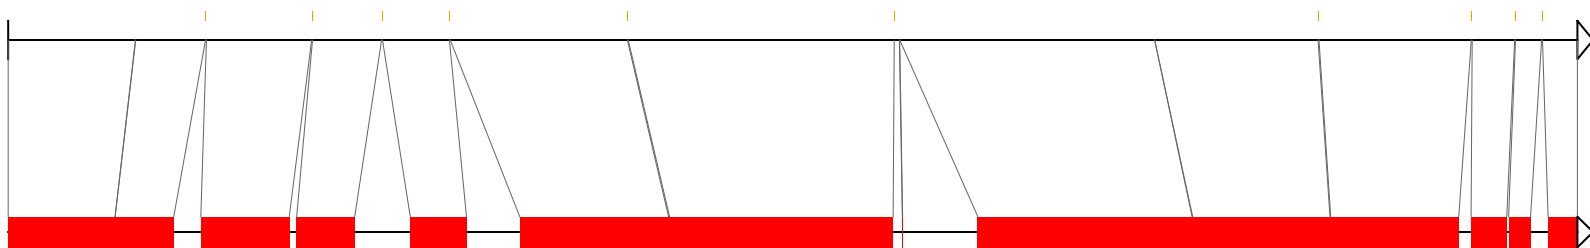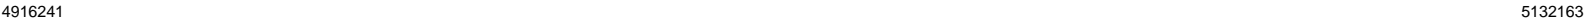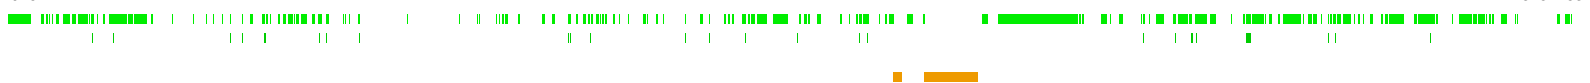

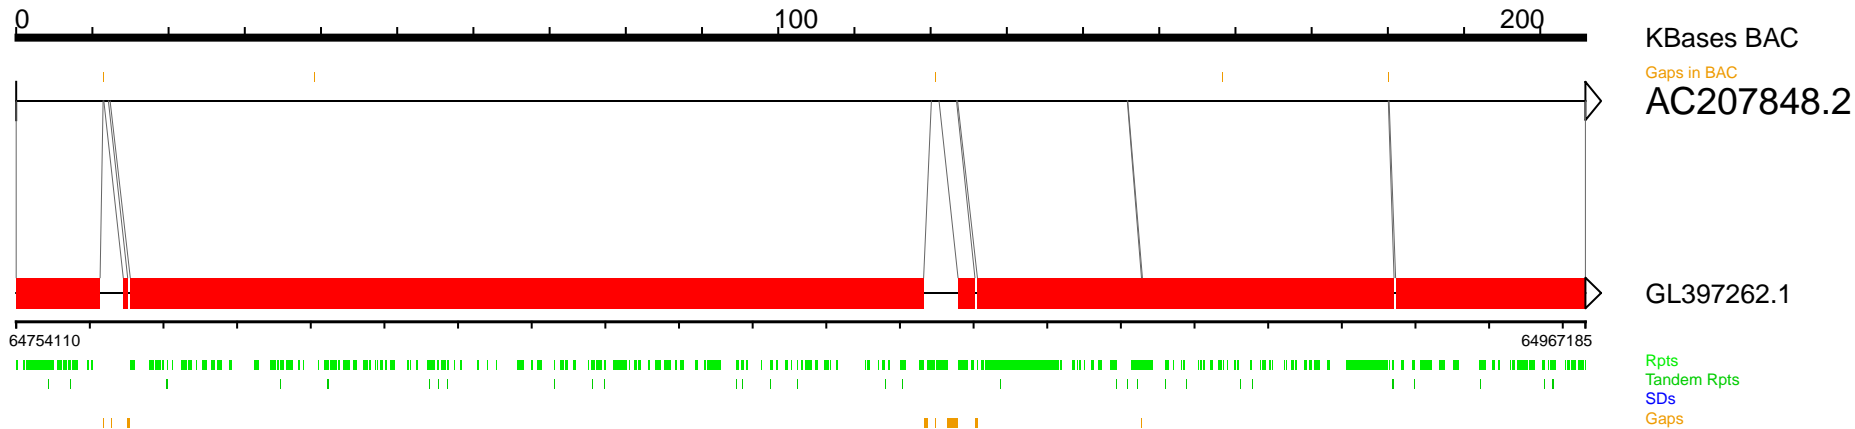

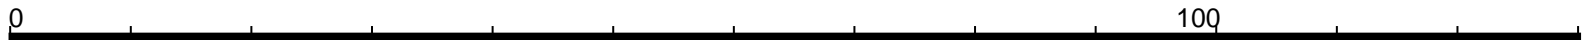

KBases BAC

Gaps in BAC

AC207849.3

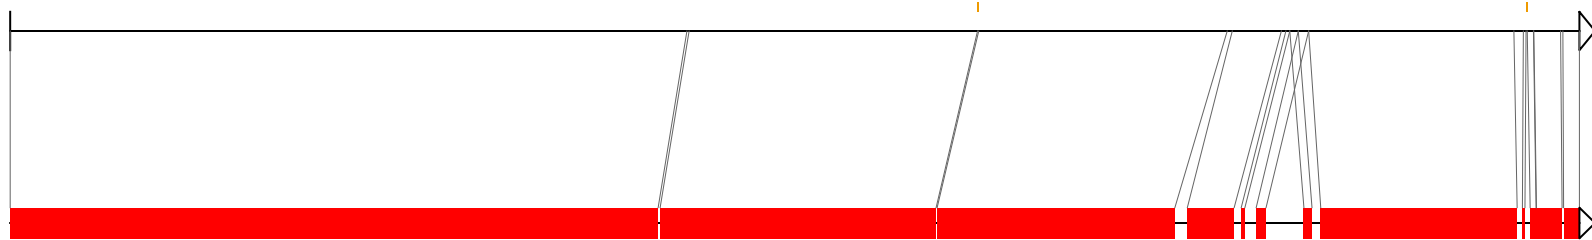

GL397305.1

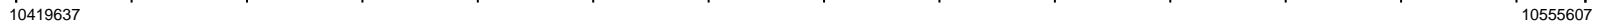

Rpts  
Tandem Rpts  
SDs  
Gaps

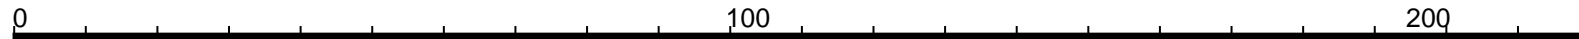

Kbases BAC

Gaps in BAC

AC207850.2

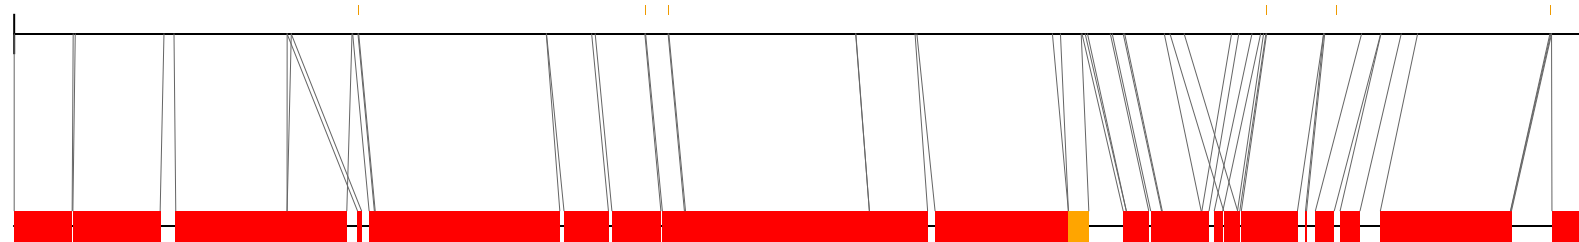

GL397488.1

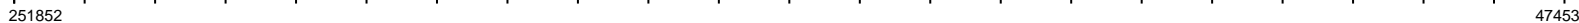

Rpts  
Tandem Rpts  
SDs  
Gaps

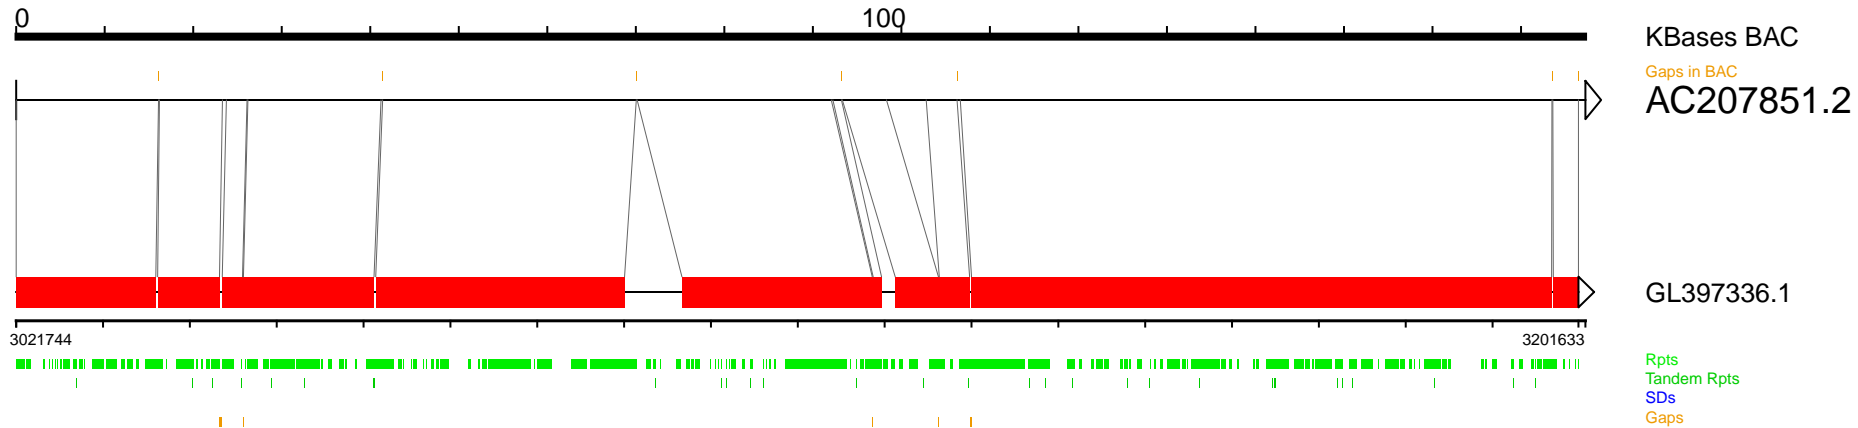

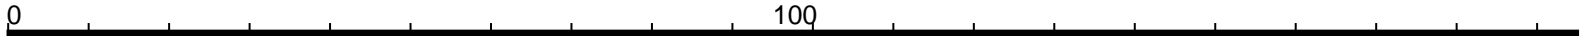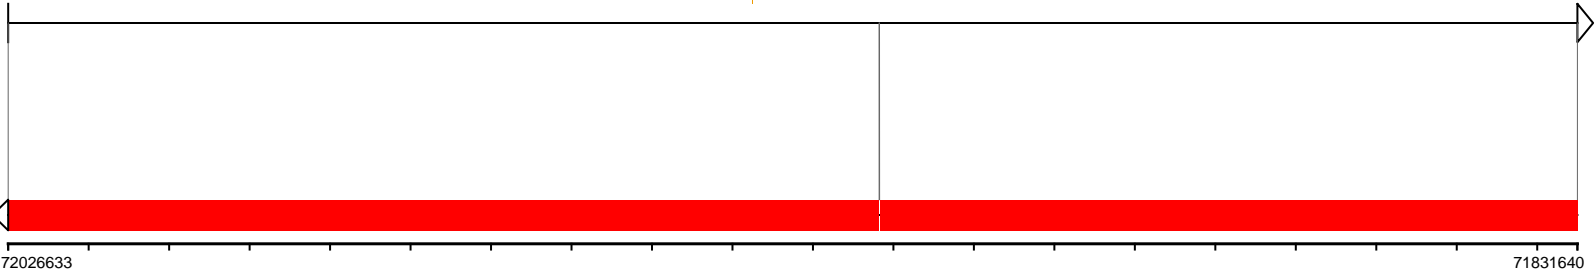

KBases BAC  
Gaps in BAC  
AC207852.2

GL397261.1

Rpts  
Tandem Rpts  
SDs  
Gaps

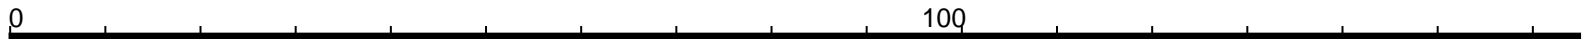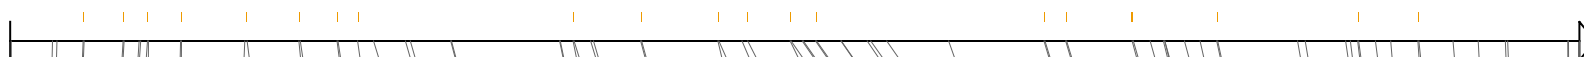

KBases BAC

Gaps in BAC

AC207853.2

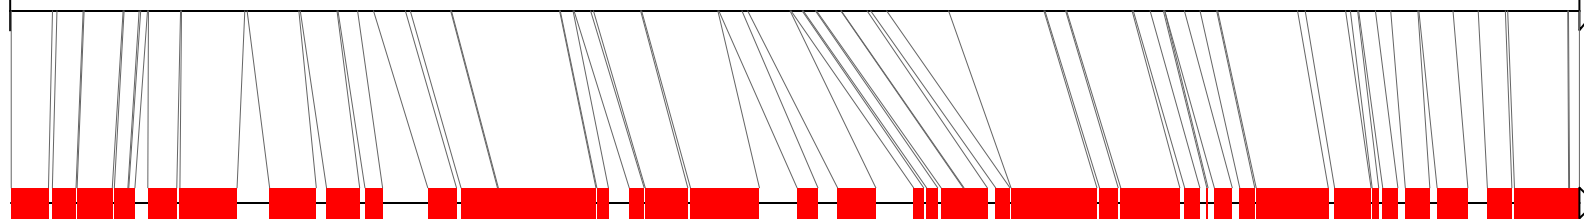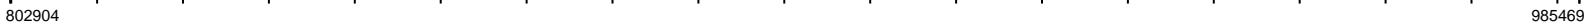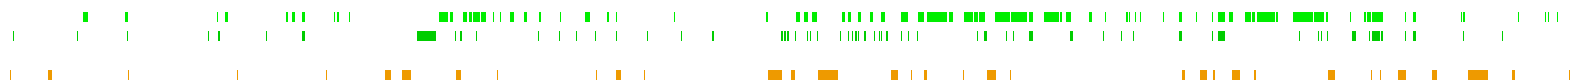

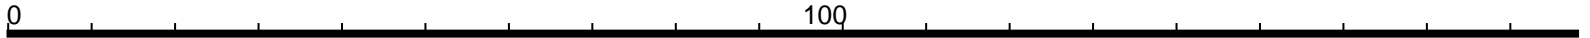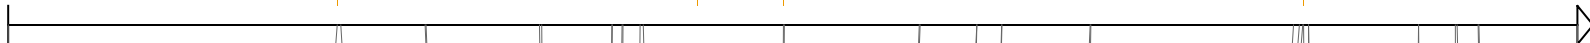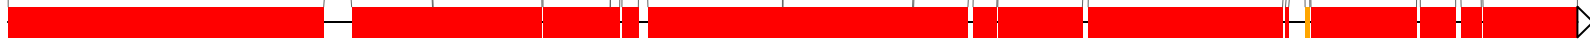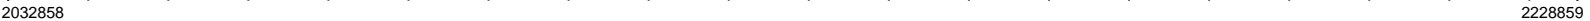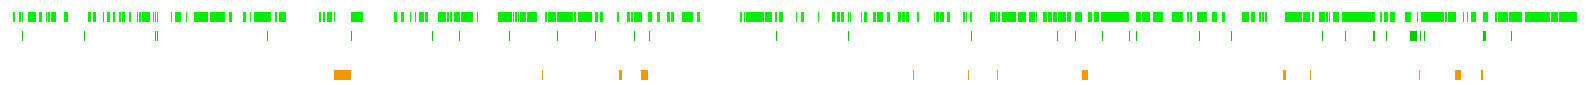

KBases BAC

Gaps in BAC

GL397303.1

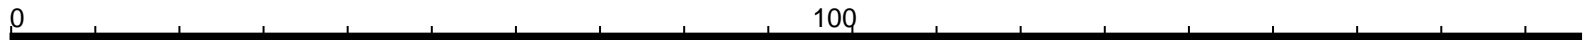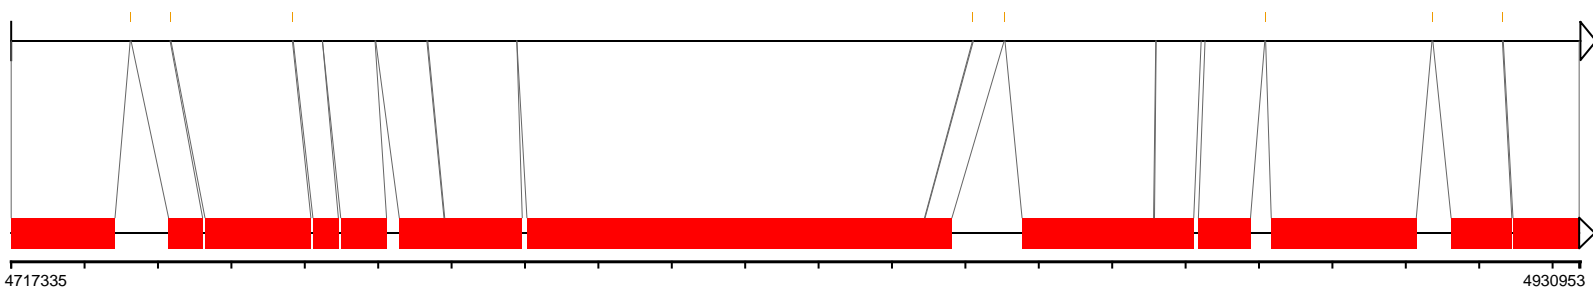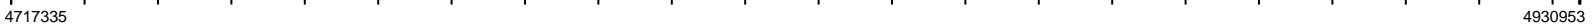

KBases BAC  
AC208277.2

GL397282.1

Rpts  
Tandem Rpts  
SDs  
Gaps

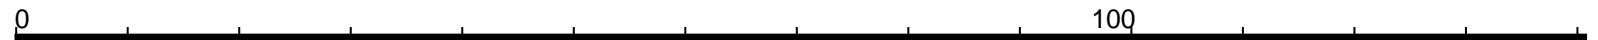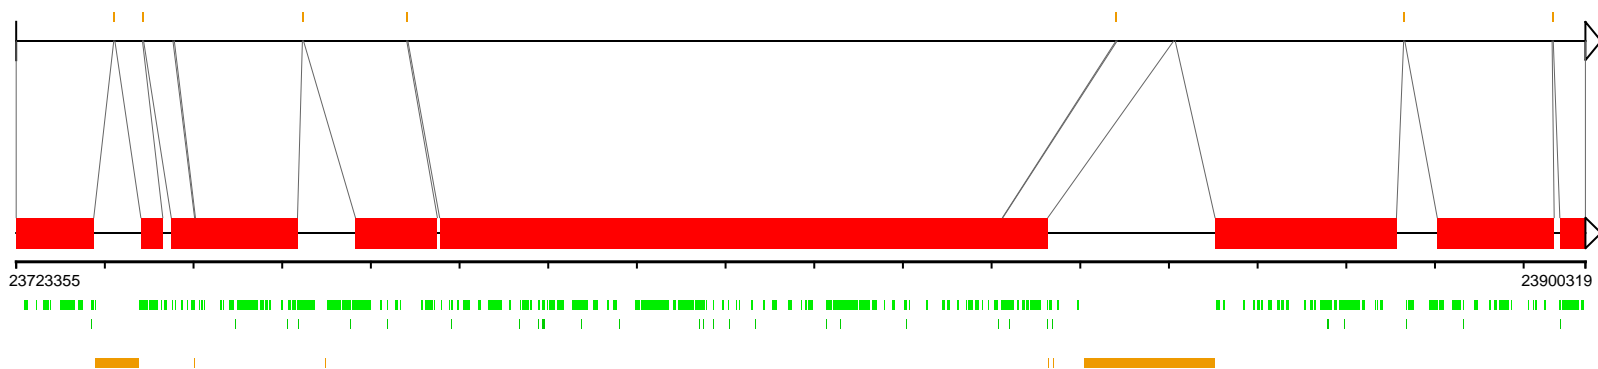

KBases BAC  
Gaps in BAC  
AC208278.2

GL397266.1

Rpts  
Tandem Rpts  
SDs  
Gaps

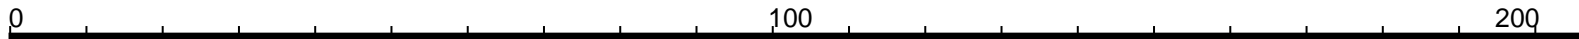

KBases BAC

Gaps in BAC

AC208279.2

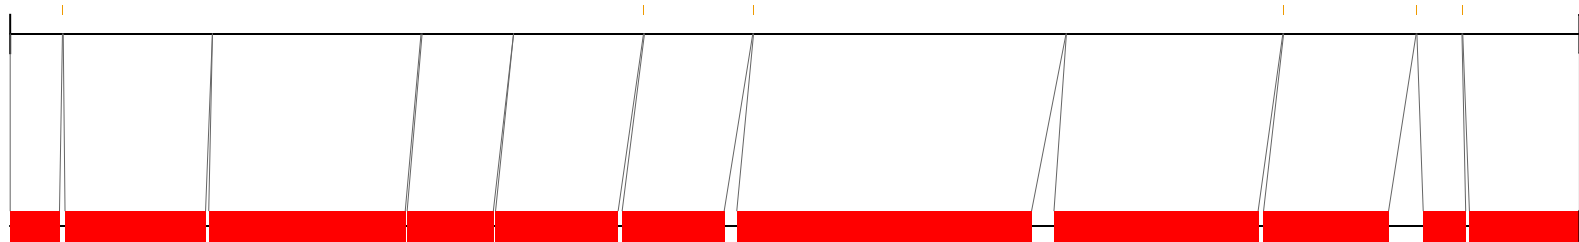

GL397282.1

4540881 4759031

Rpts  
Tandem Rpts  
SDs  
Gaps

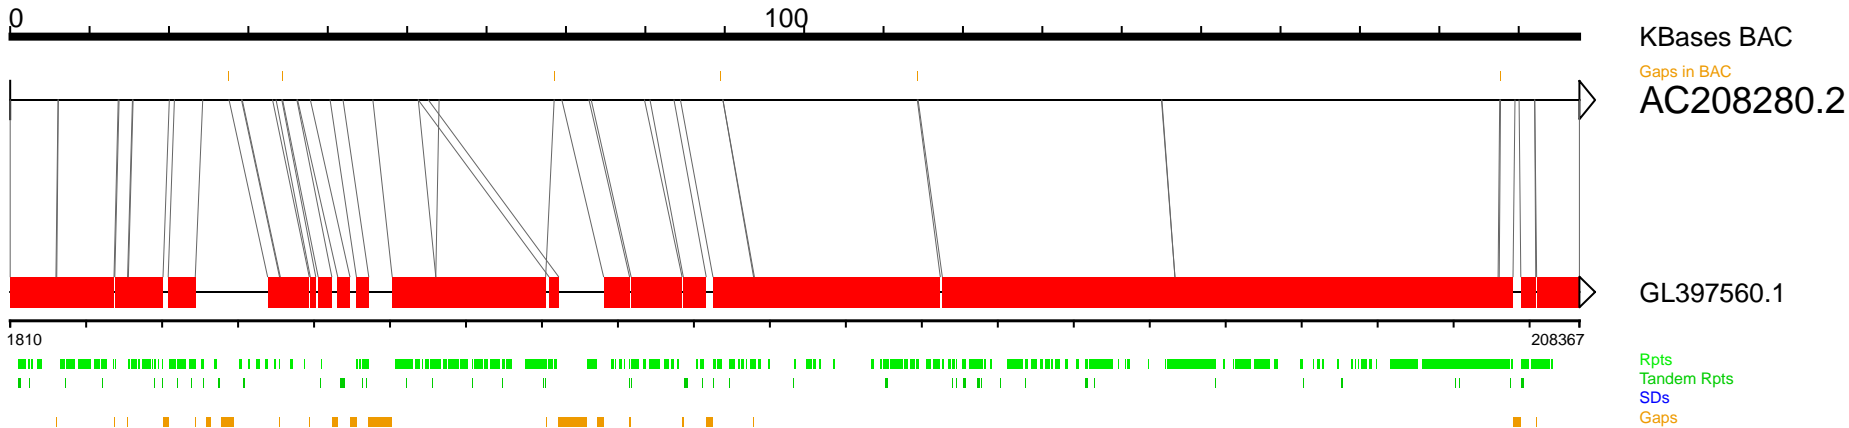

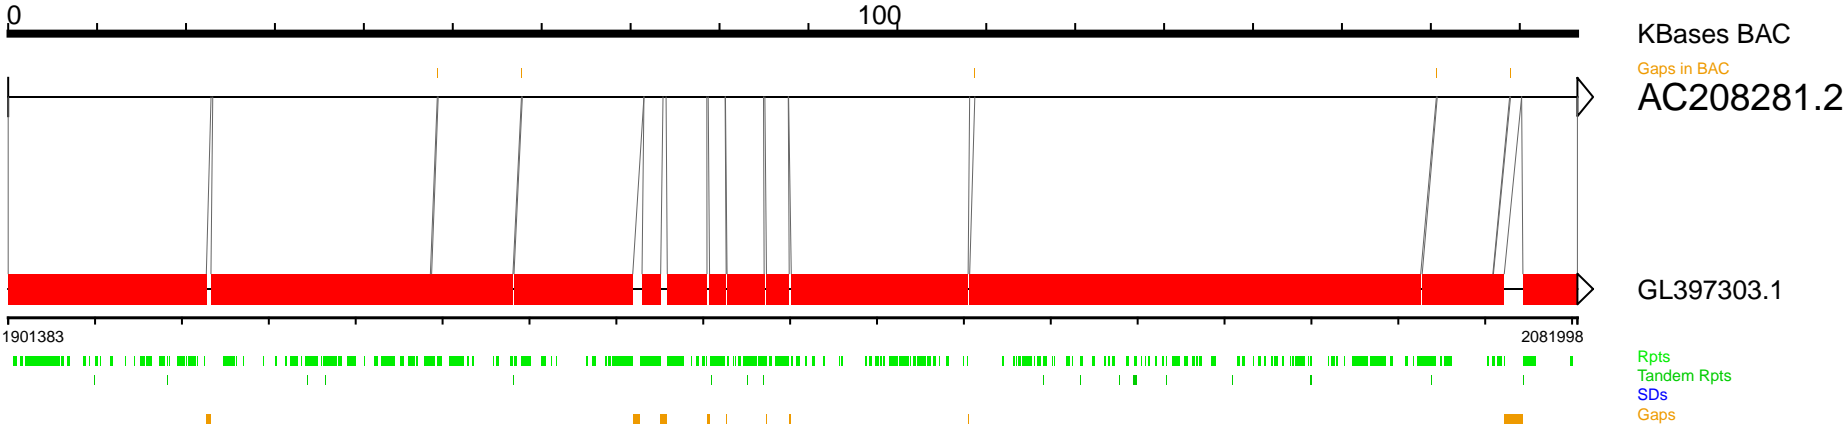

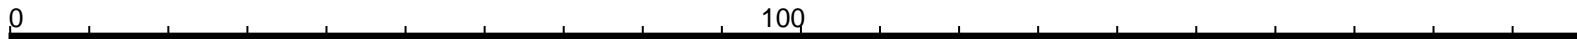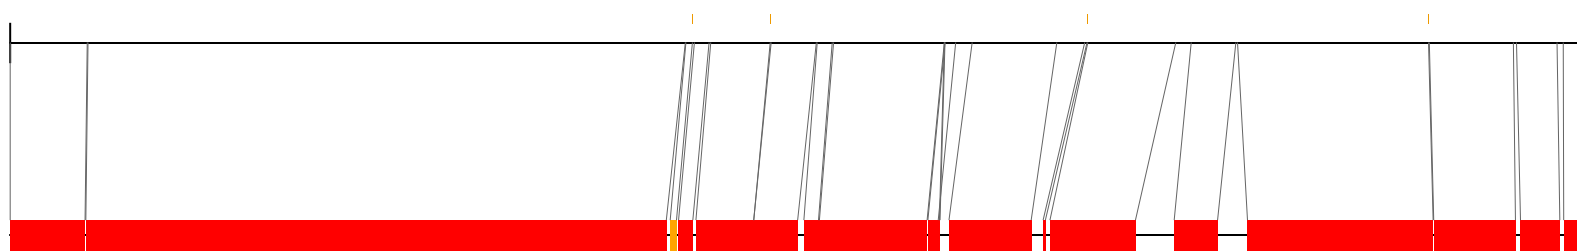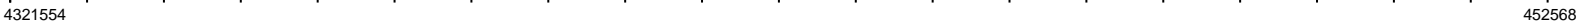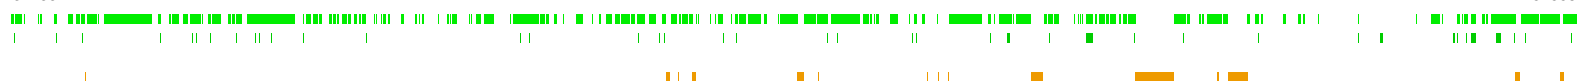

Kbases BAC  
AC208282.2

GL397306.1

Rpts  
Tandem Rpts  
SDs  
Gaps

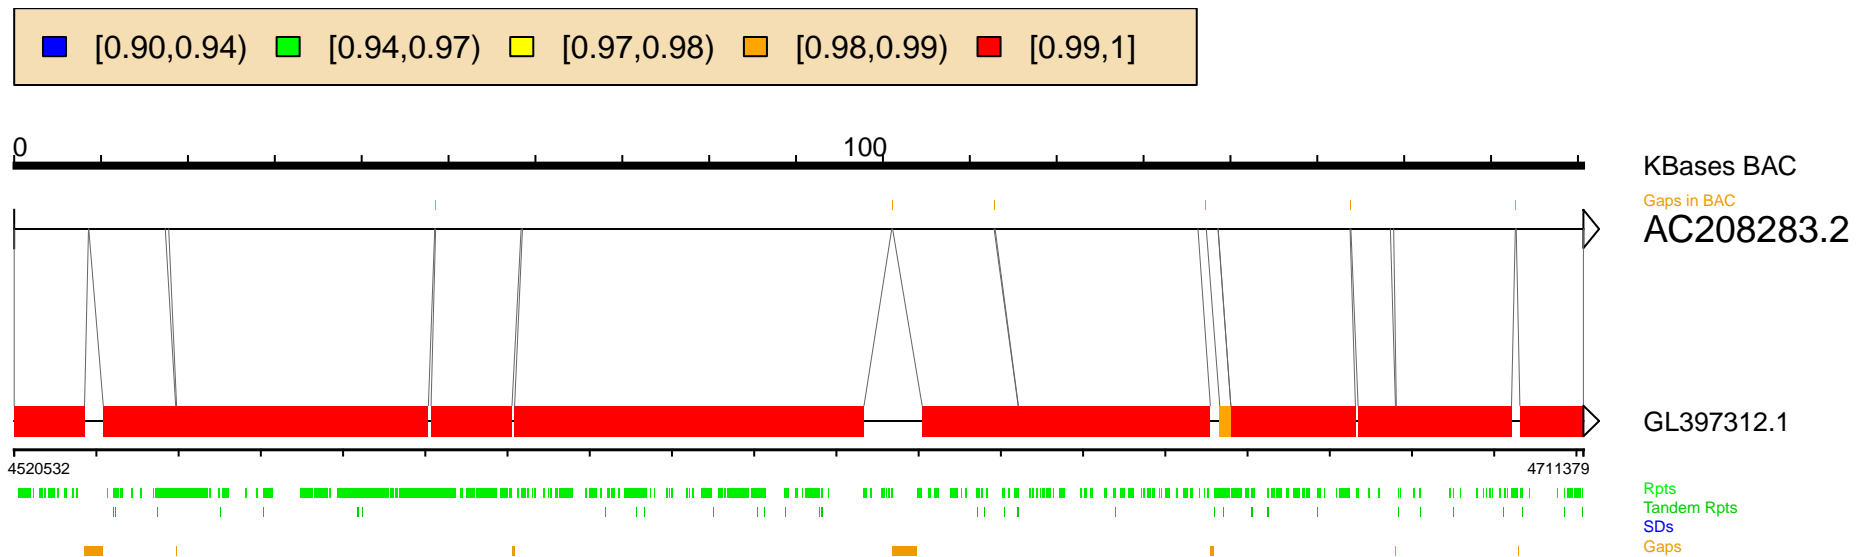

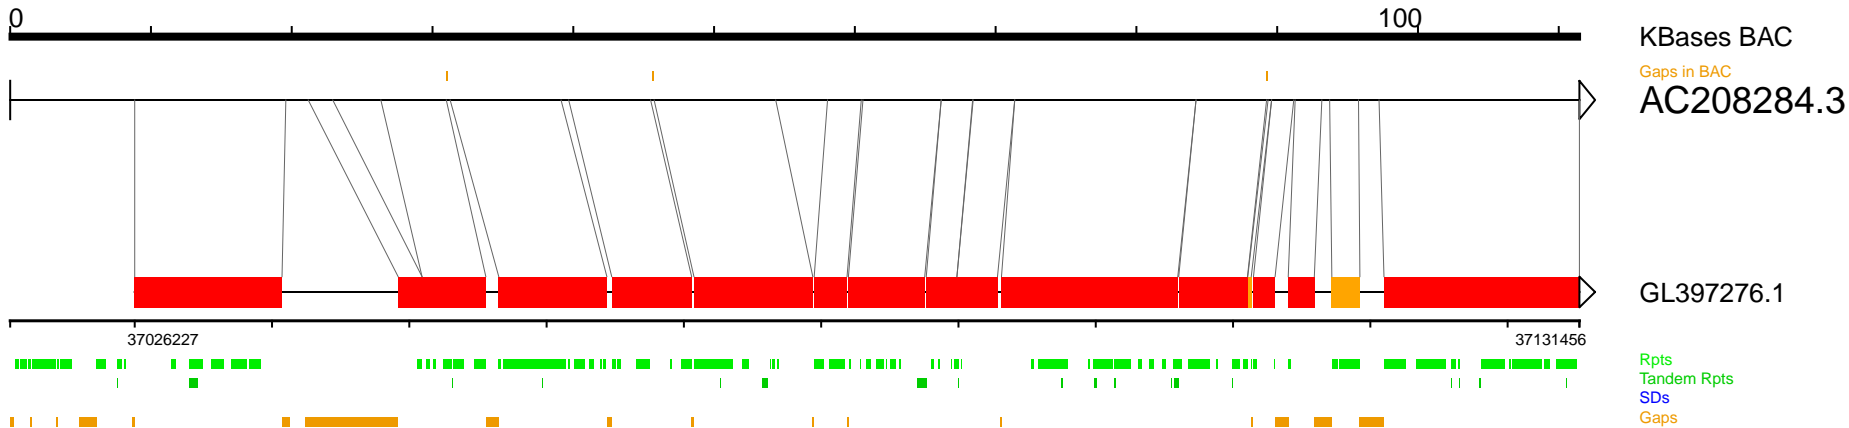

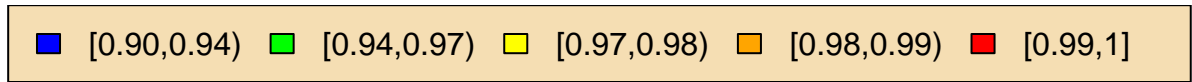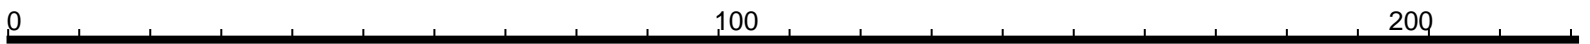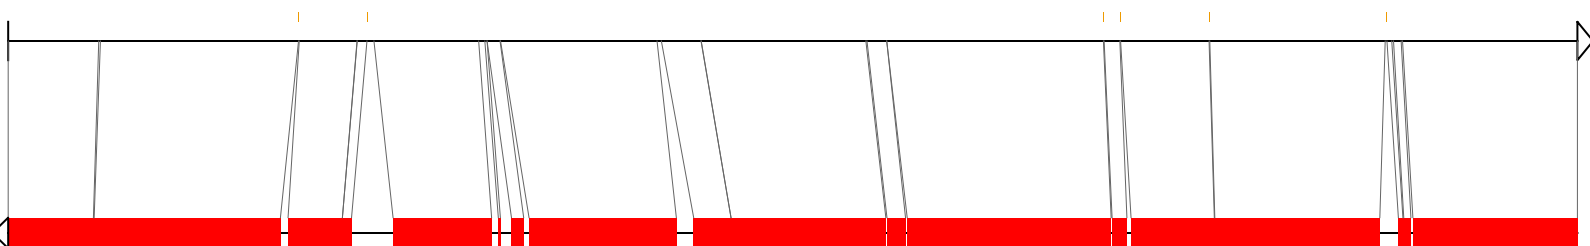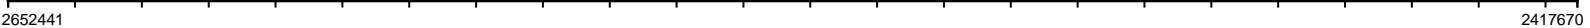

KBases BAC  
AC208285.2

GL397283.1

Rpts  
Tandem Rpts  
SDs  
Gaps

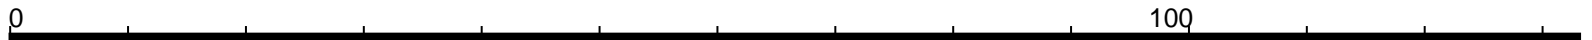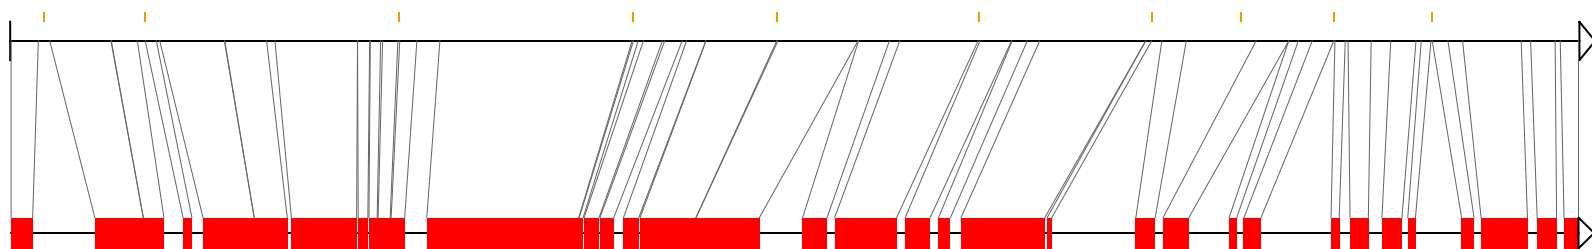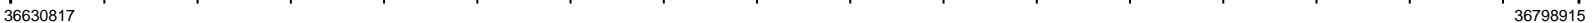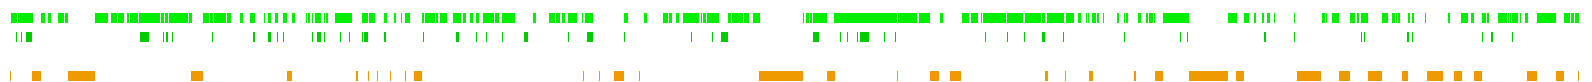

Kbases BAC  
Gaps in BAC  
AC208286.2

GL397276.1

Rpts  
Tandem Rpts  
SDs  
Gaps

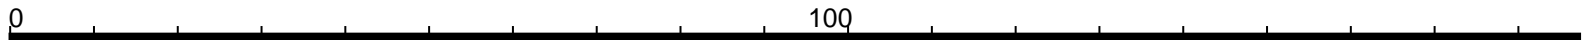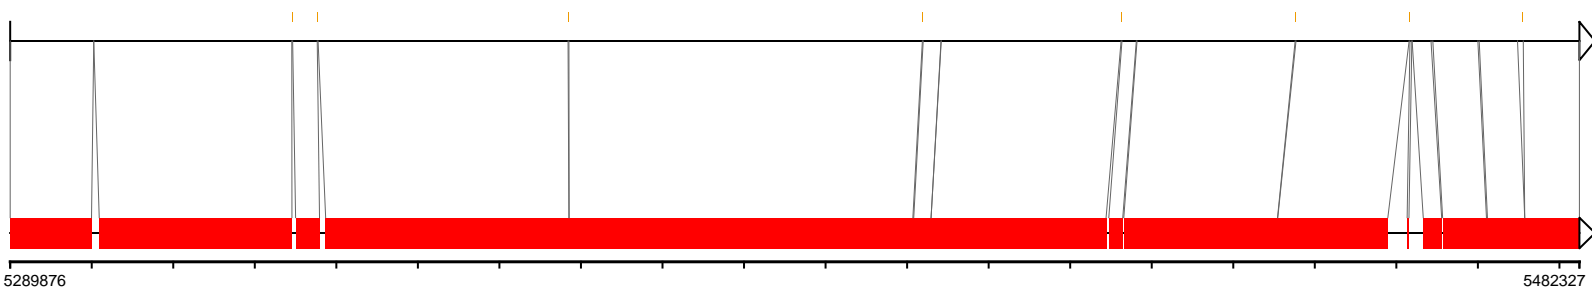

KBases BAC  
AC208287.2

GL397282.1

Rpts  
Tandem Rpts  
SDs  
Gaps

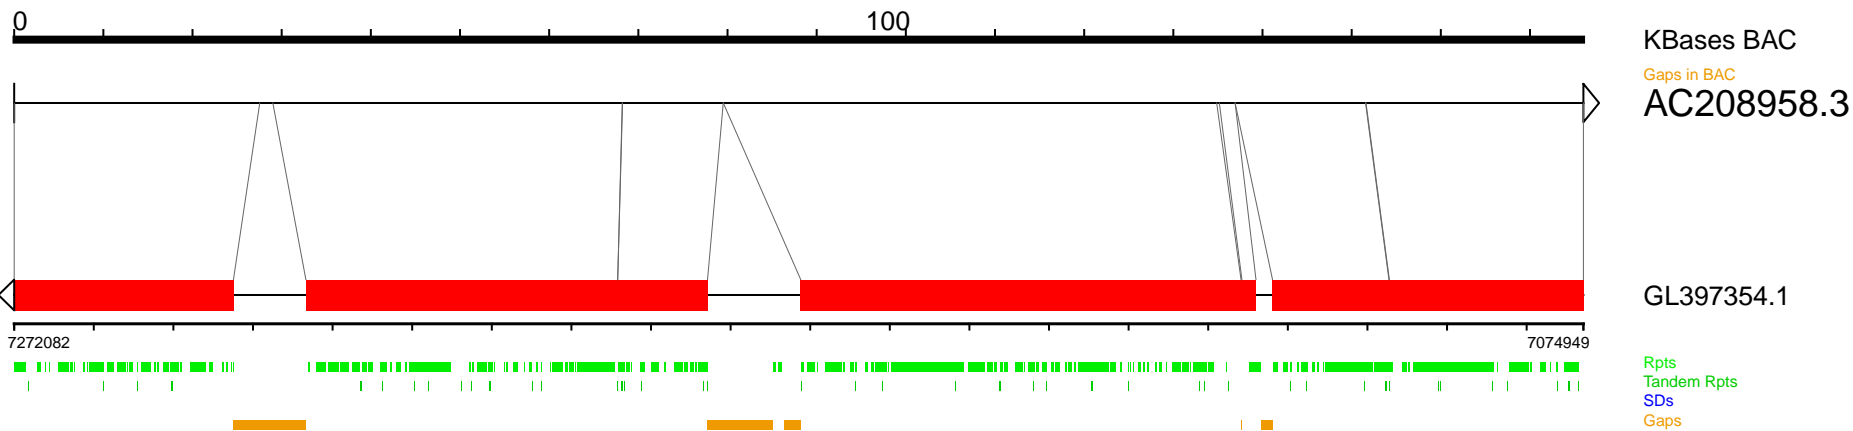

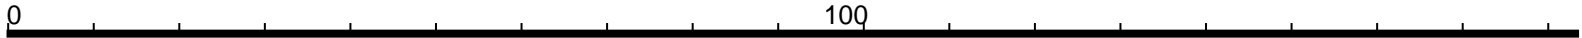

KBases BAC

Gaps in BAC

AC208960.3

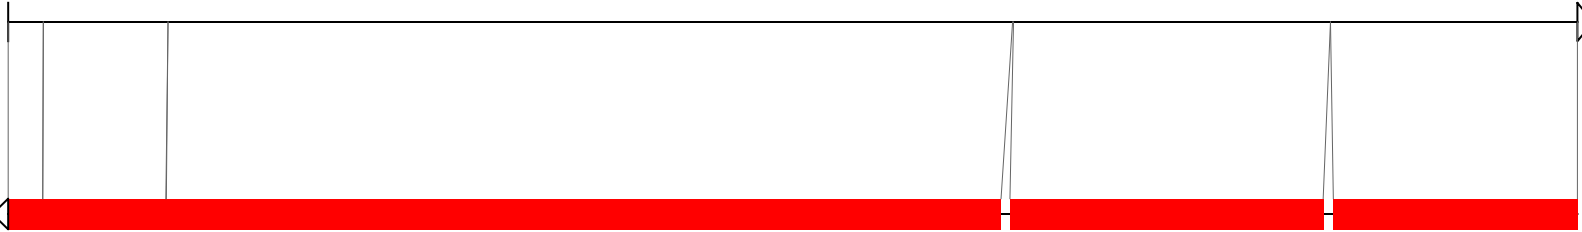

GL397261.1

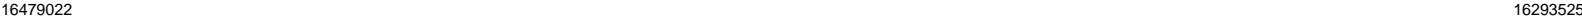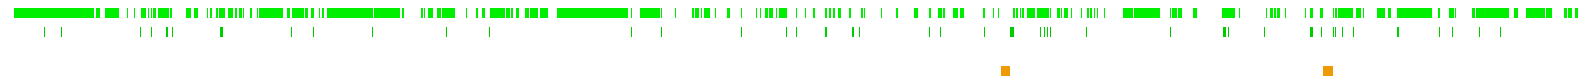

Rpts  
Tandem Rpts  
SDs  
Gaps

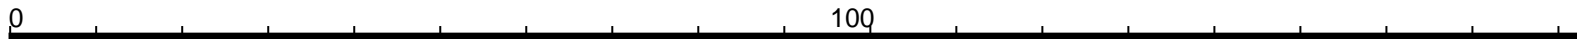

KBases BAC

Gaps in BAC

AC208964.4

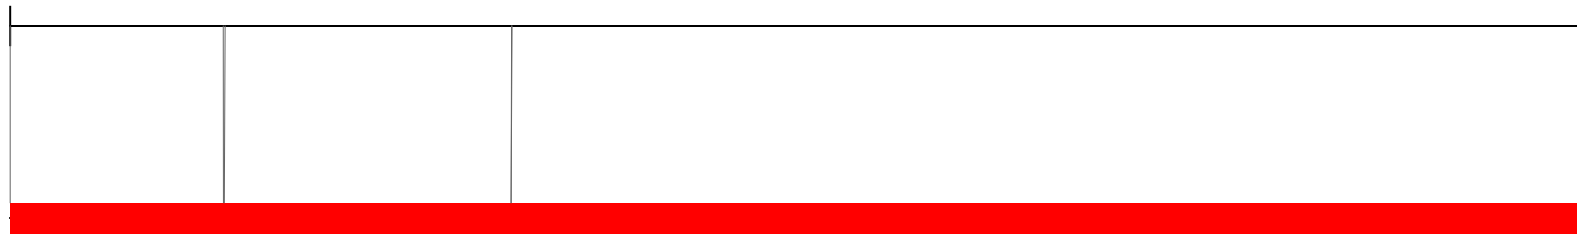

GL397283.1

7208273 7390532

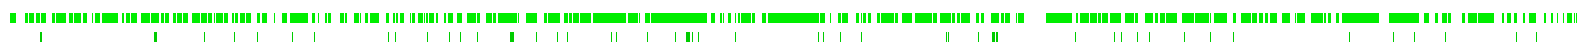

Rpts  
Tandem Rpts  
SDs  
Gaps

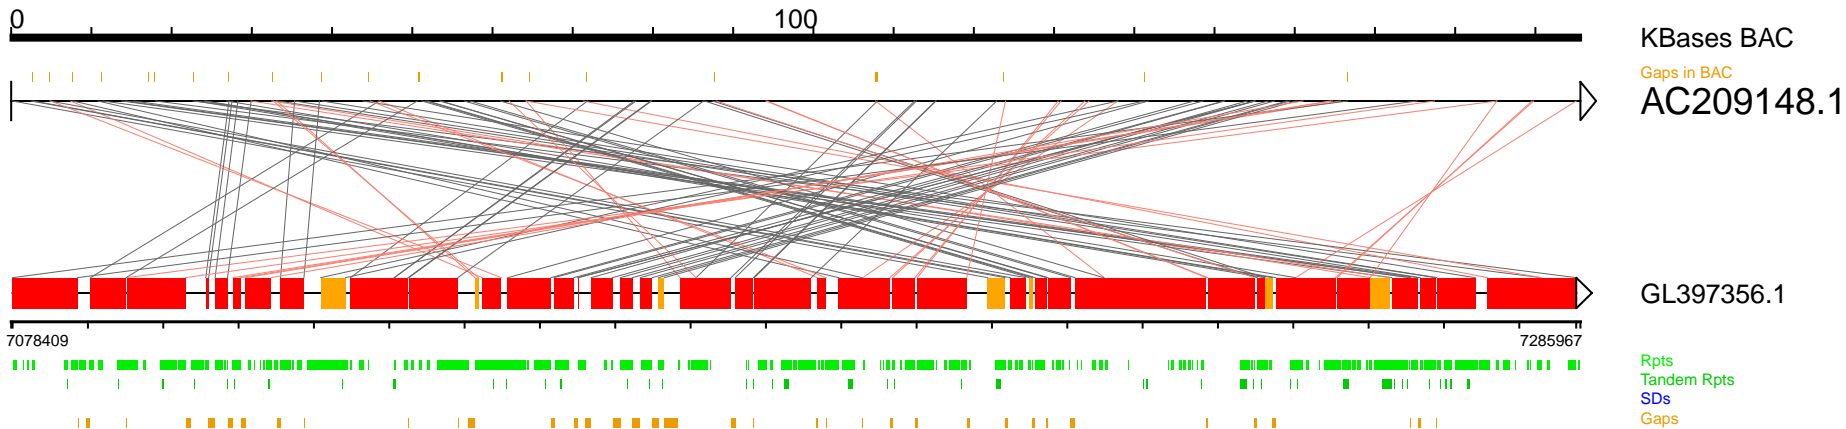

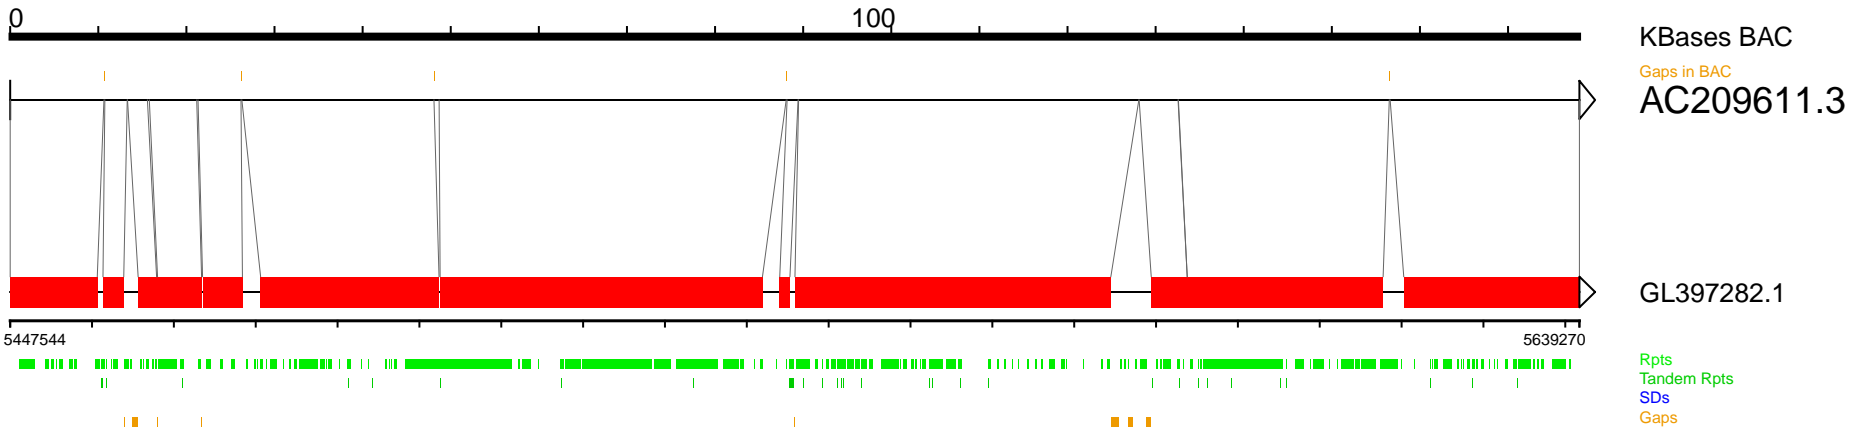

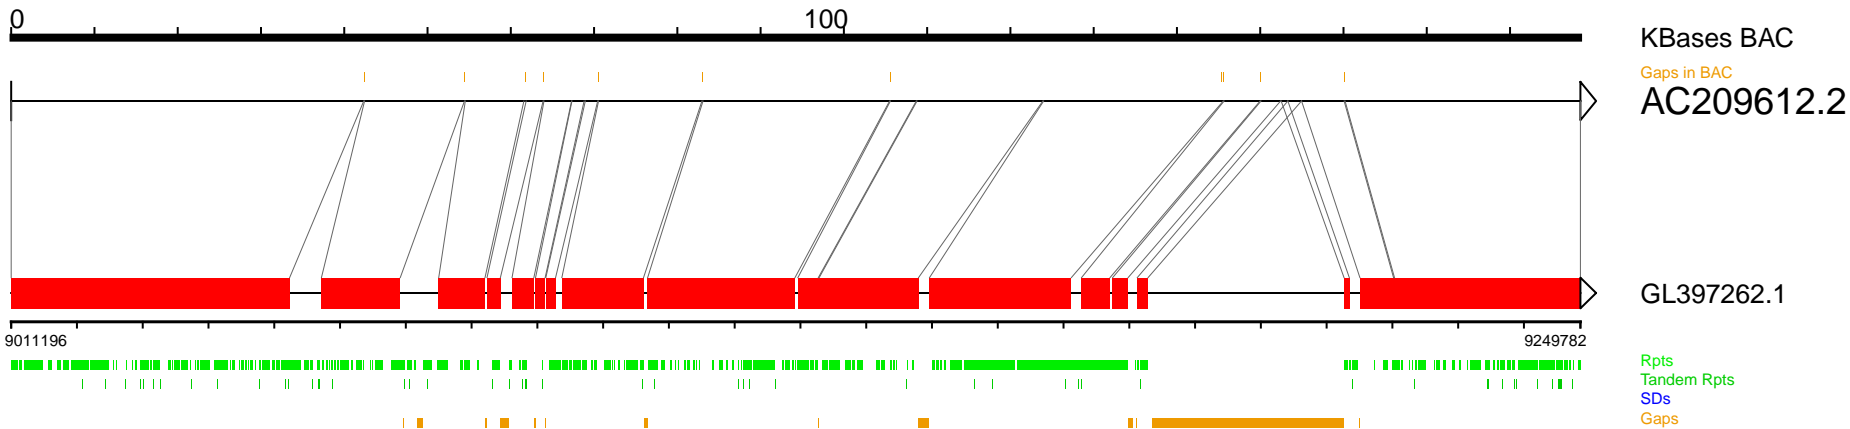

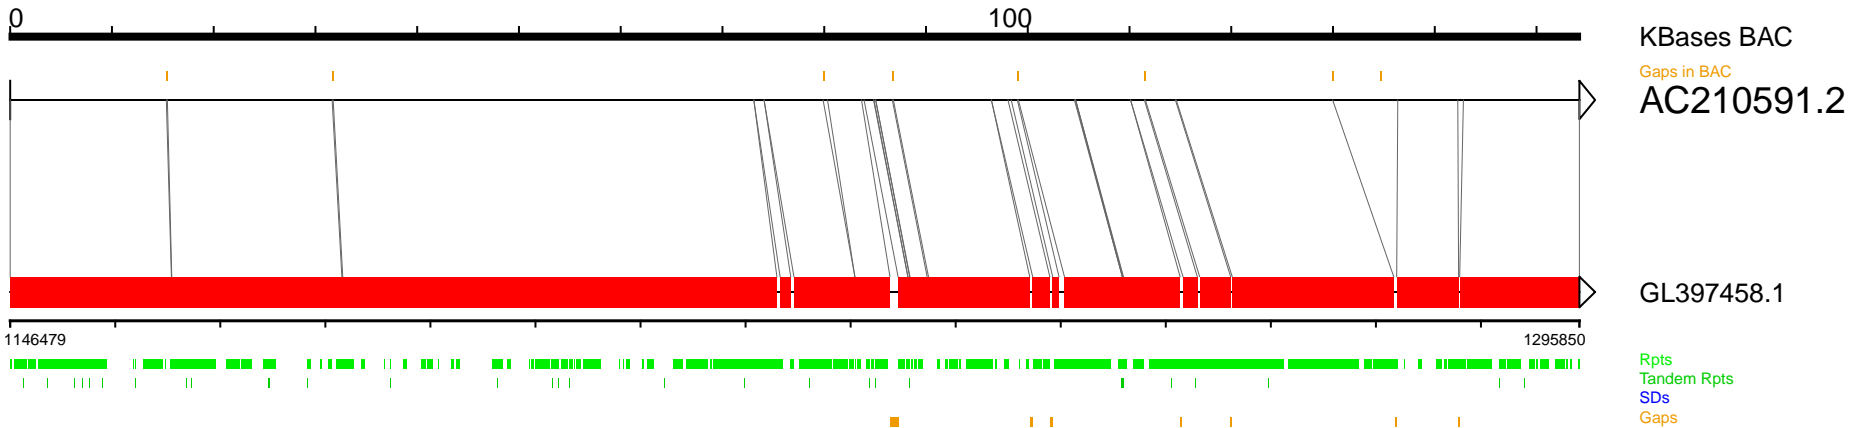

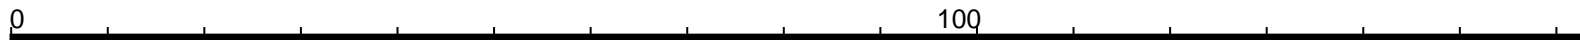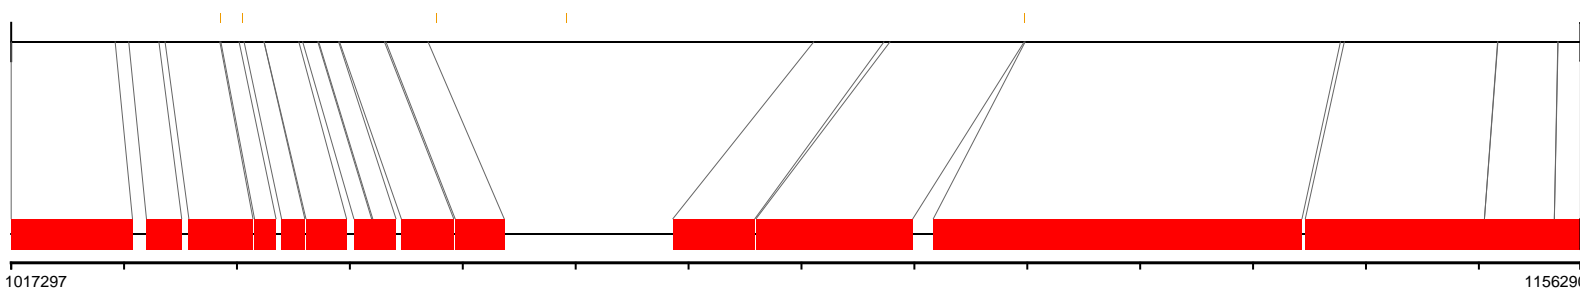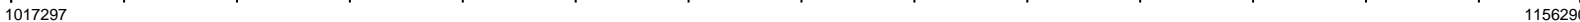

KBases BAC

Gaps in BAC

AC210592.2

GL397458.1

Rpts  
Tandem Rpts  
SDs  
Gaps

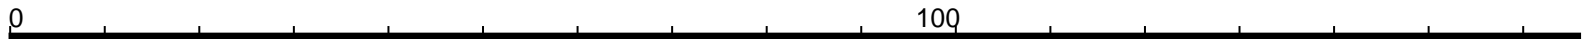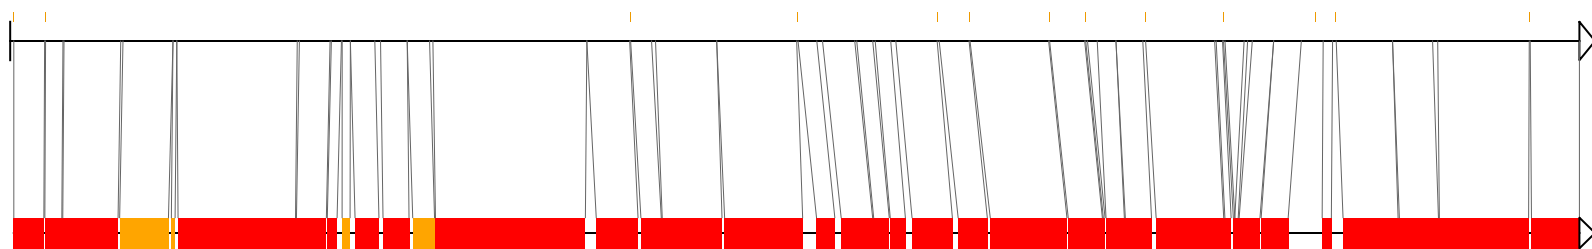

Kbases BAC  
Gaps in BAC  
AC211131.3

GL397334.1

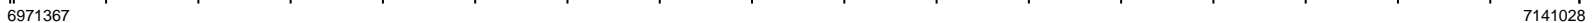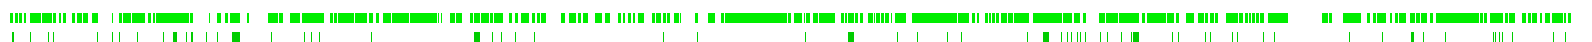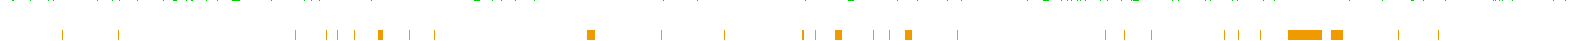

Rpts  
Tandem Rpts  
SDs  
Gaps

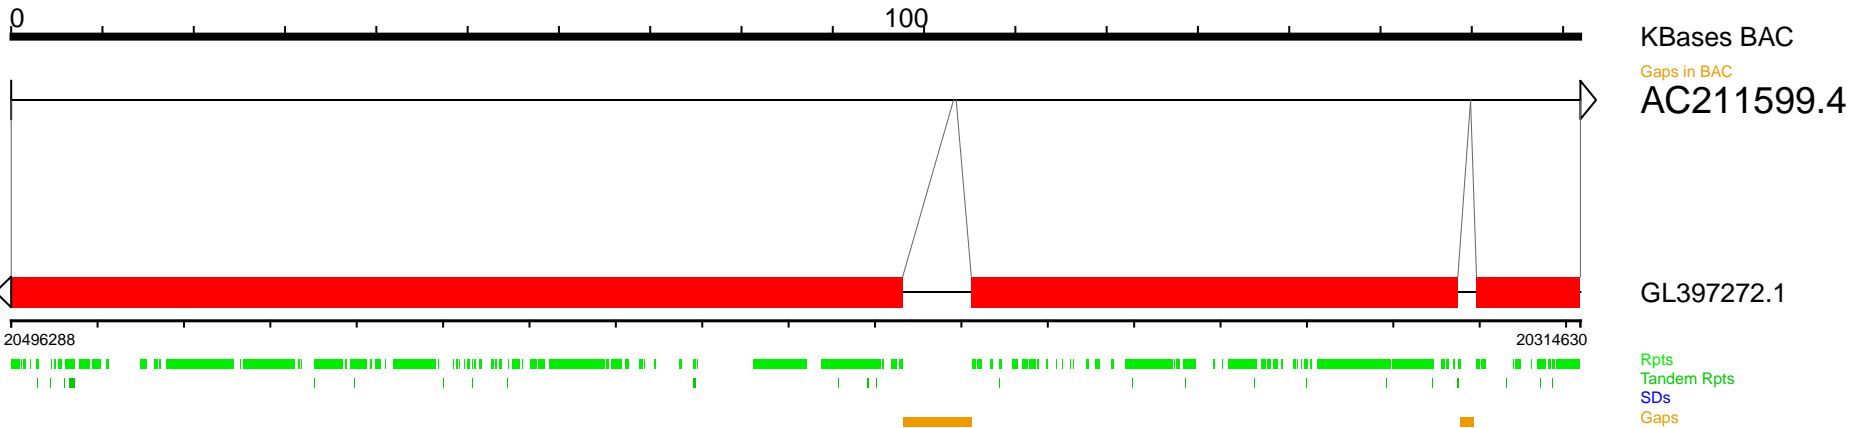

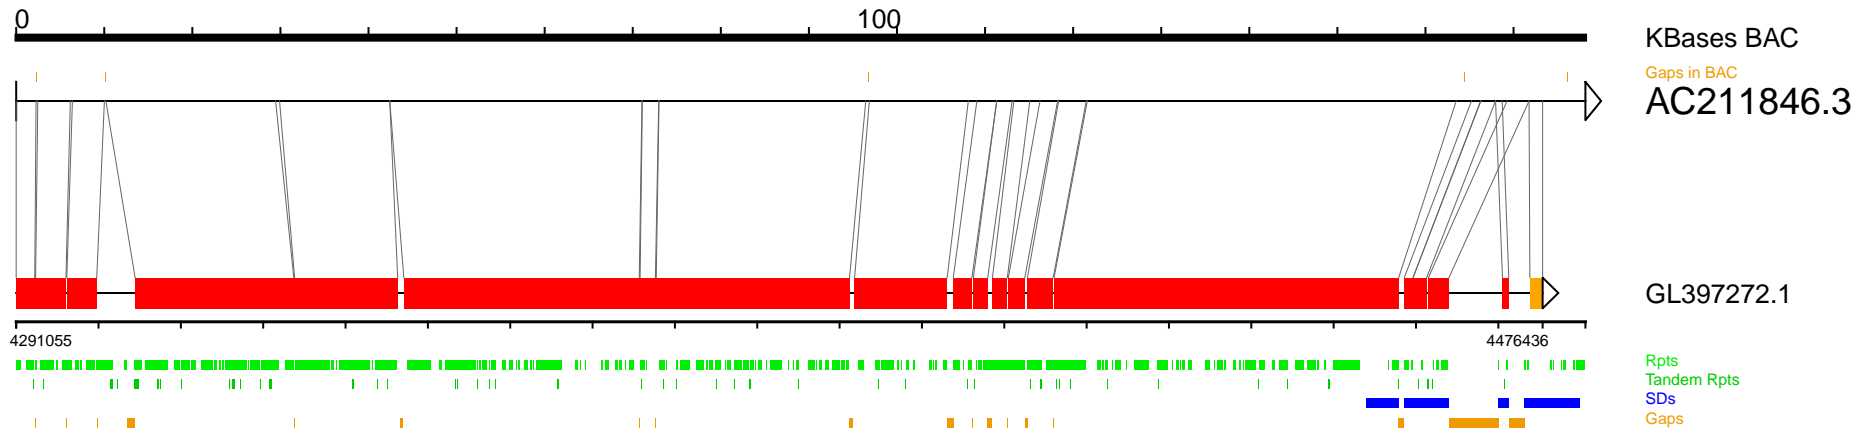

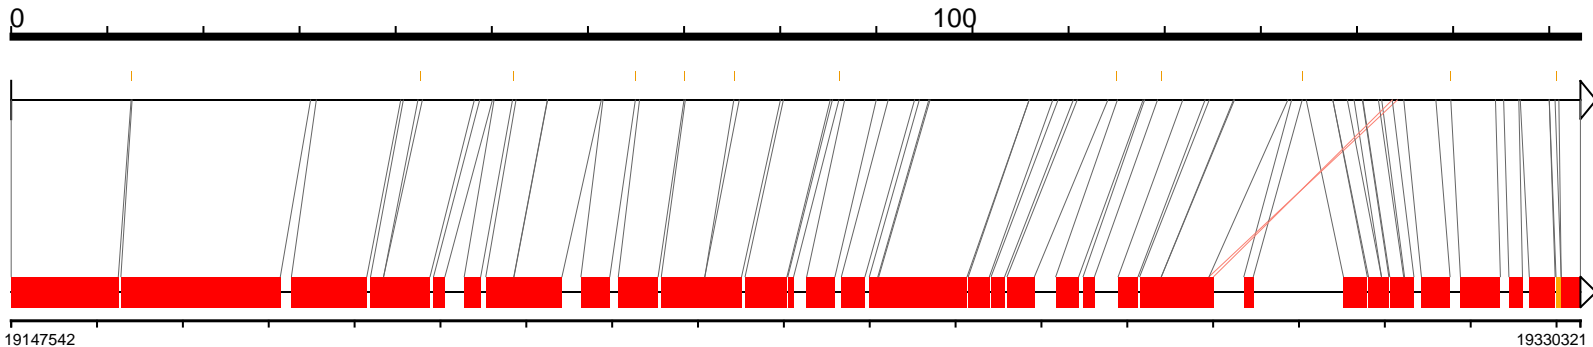

KBases BAC  
Gaps in BAC  
AC212965.2

GL397286.1

Rpts  
Tandem Rpts  
SDs  
Gaps

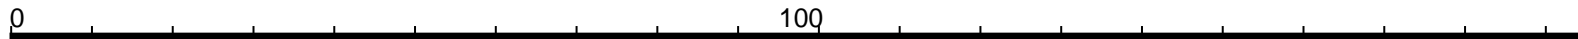

KBases BAC

Gaps in BAC

AC214603.3

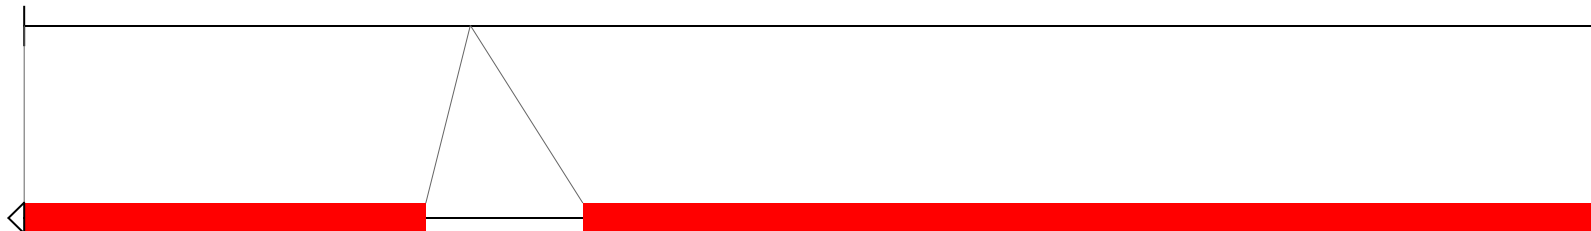

GL397369.1

5390496 5174835

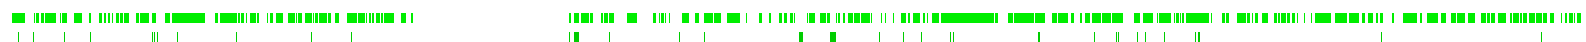

Rpts  
Tandem Rpts  
SDs  
Gaps

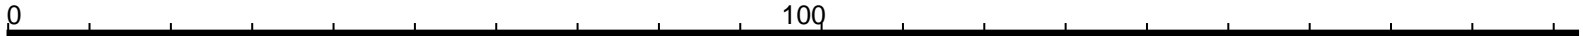

KBases BAC

Gaps in BAC

AC214604.3

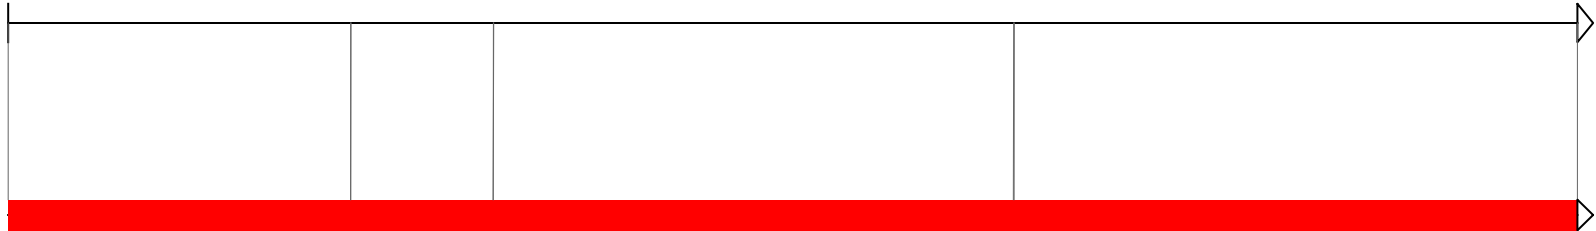

GL397274.1

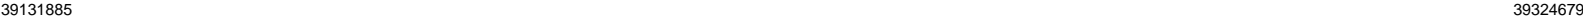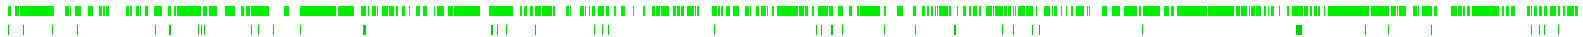

Rpts  
Tandem Rpts  
SDs  
Gaps

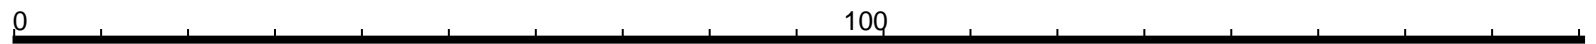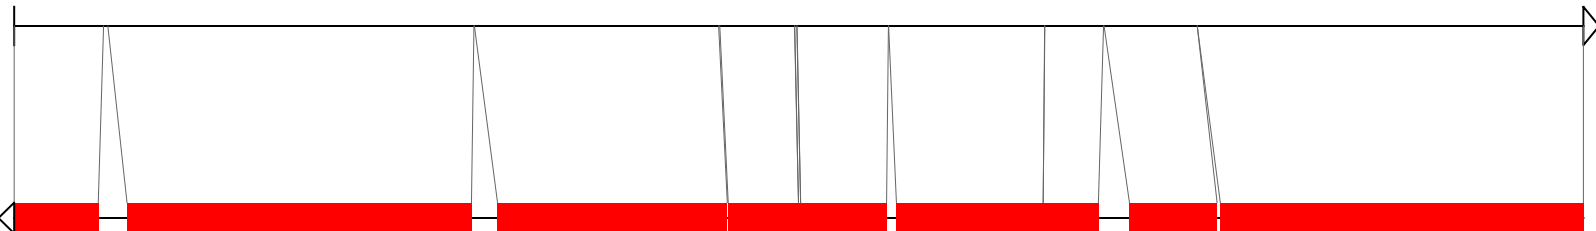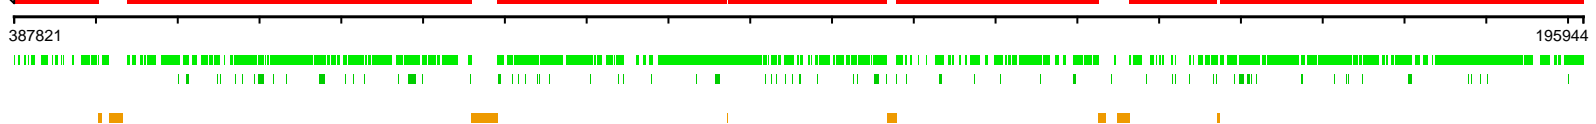

KBases BAC  
AC214645.3

GL397283.1

Rpts  
Tandem Rpts  
SDs  
Gaps

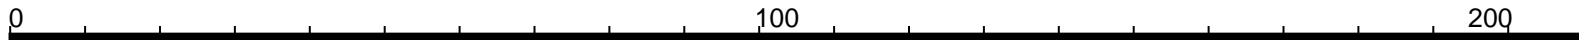

Kbases BAC

Gaps in BAC

AC214647.3

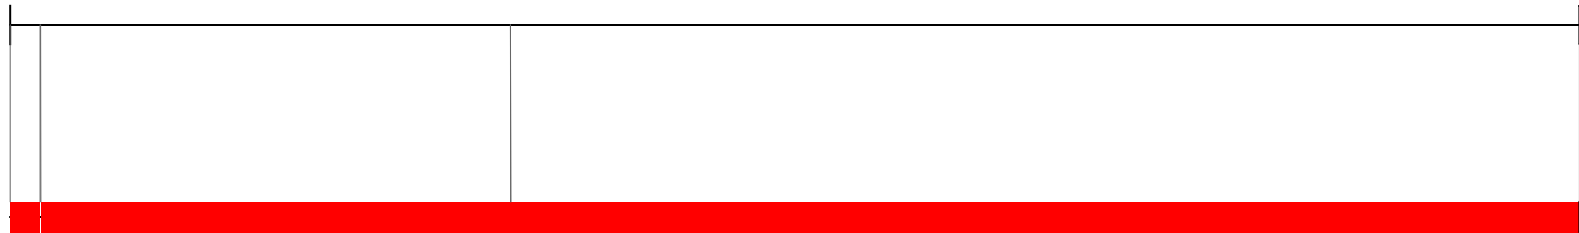

GL397262.1

17095528 17305009

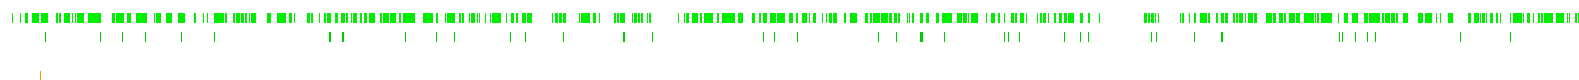

Rpts  
Tandem Rpts  
SDs  
Gaps

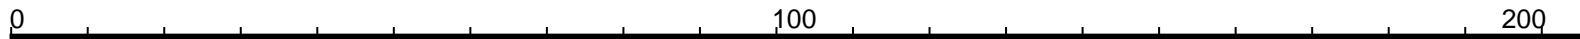

KBases BAC

Gaps in BAC

AC214653.3

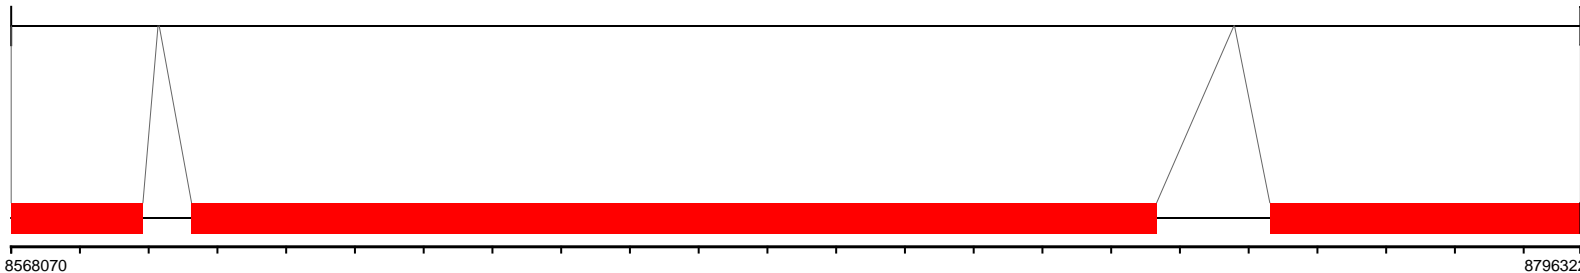

GL397330.1

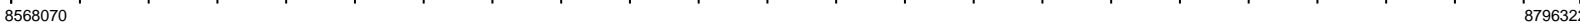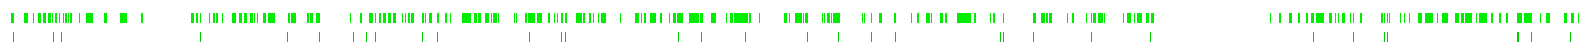

Rpts  
Tandem Rpts

SDs

Gaps

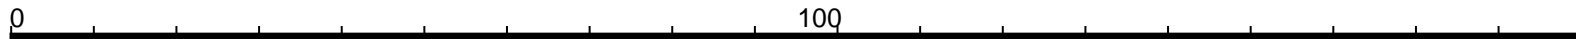

KBases BAC

Gaps in BAC

AC214972.4

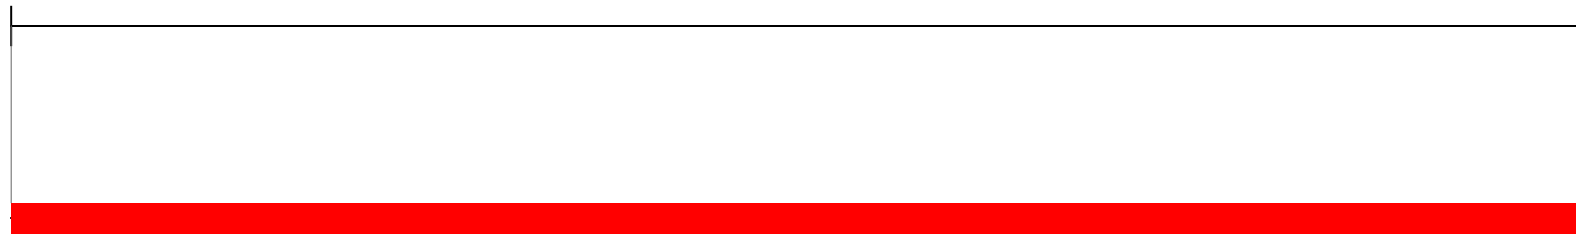

GL397306.1

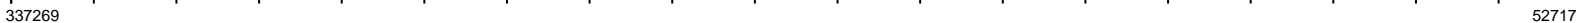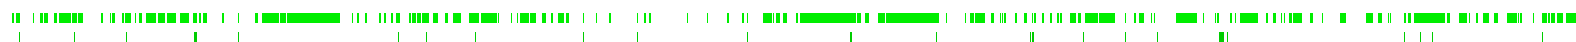

Rpts  
Tandem Rpts  
SDs  
Gaps

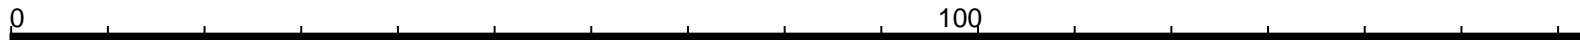

KBases BAC

Gaps in BAC

AC215262.3

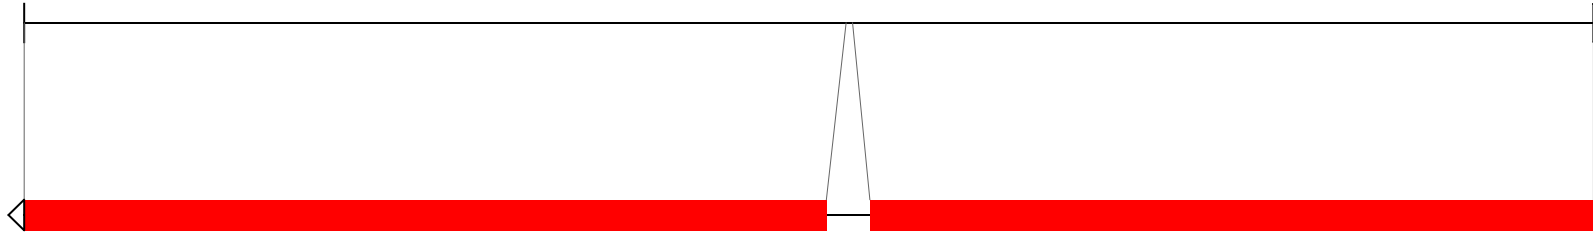

GL397272.1

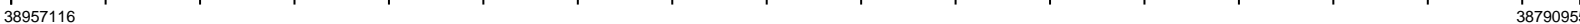

Rpts  
Tandem Rpts  
SDs  
Gaps

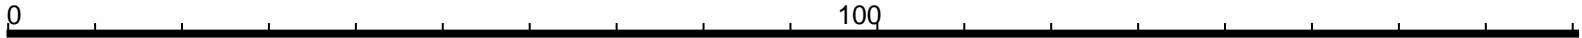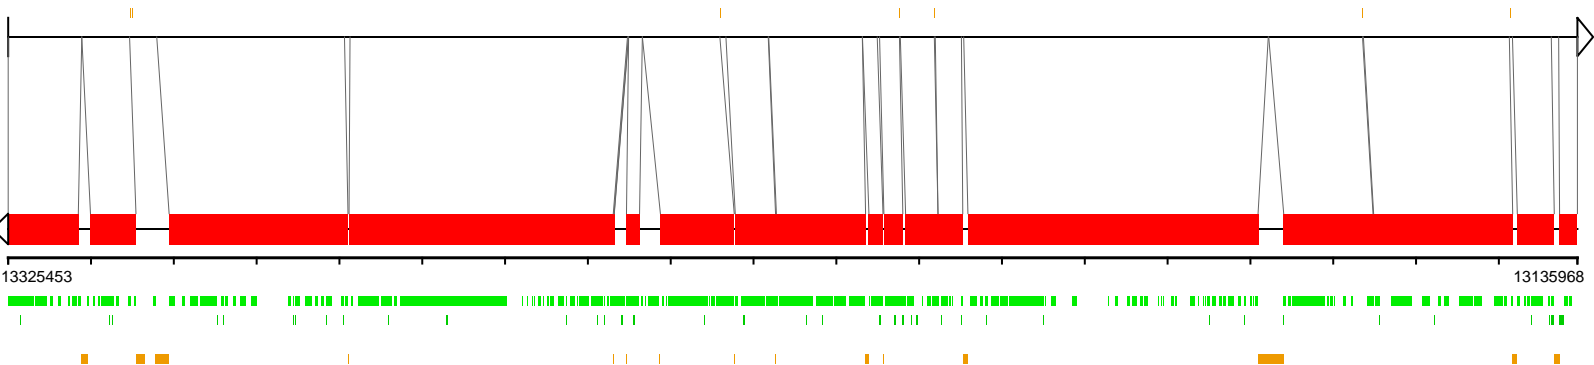

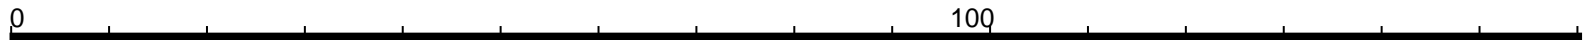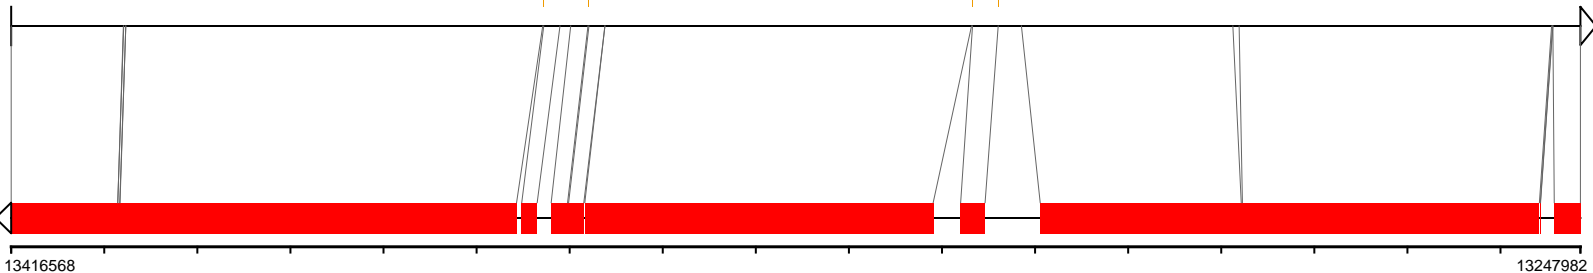

KBases BAC  
Gaps in BAC  
AC216181.2

GL397297.1

Rpts  
Tandem Rpts  
SDs  
Gaps

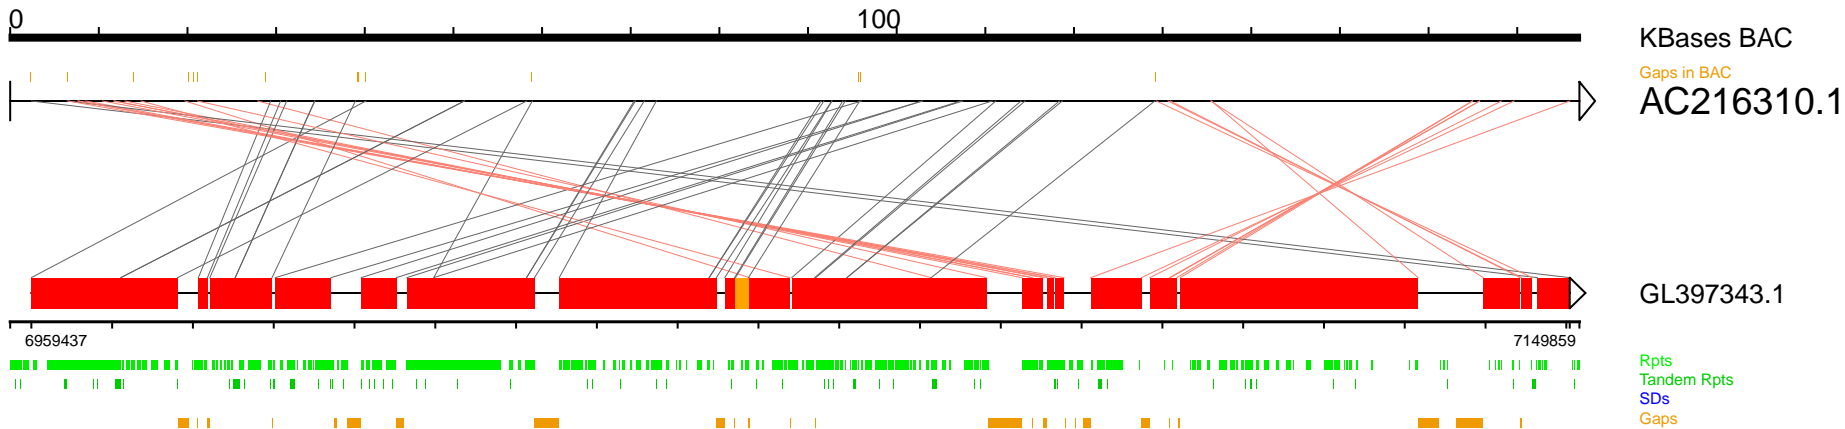

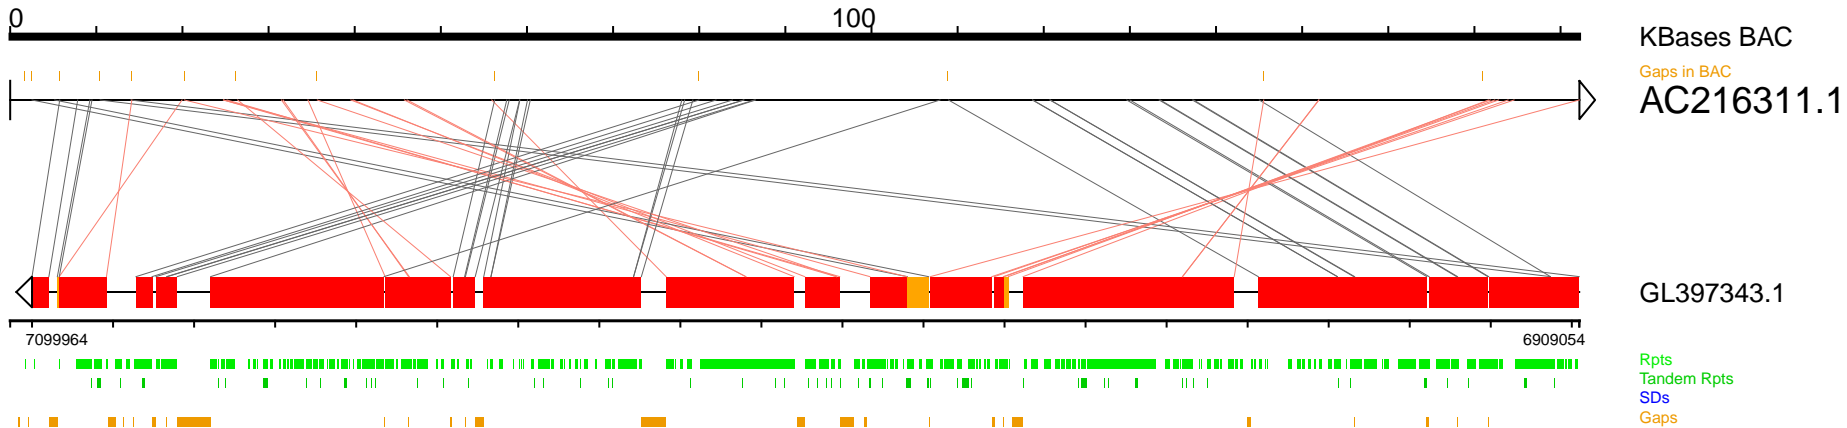

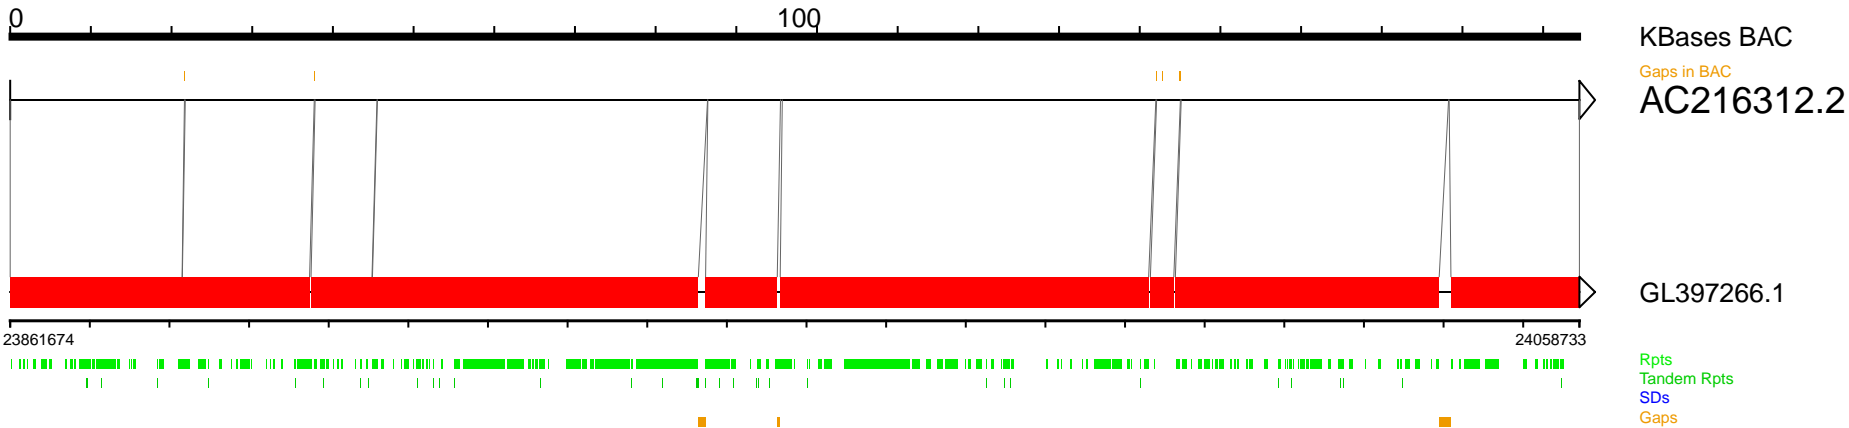

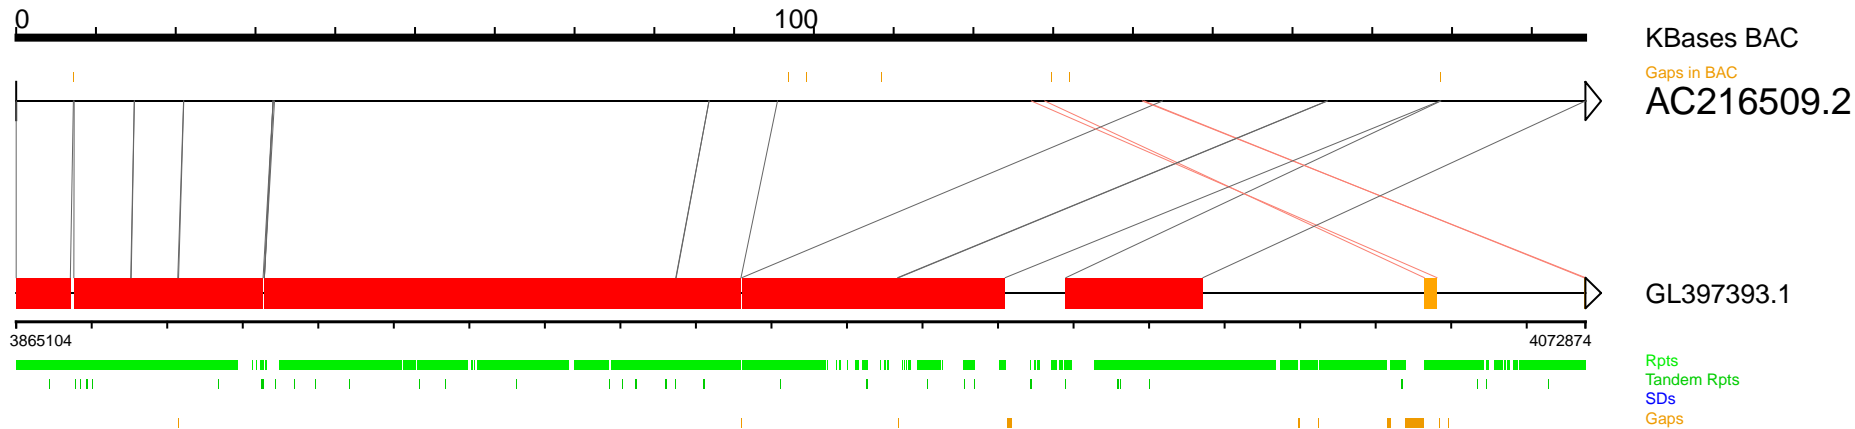

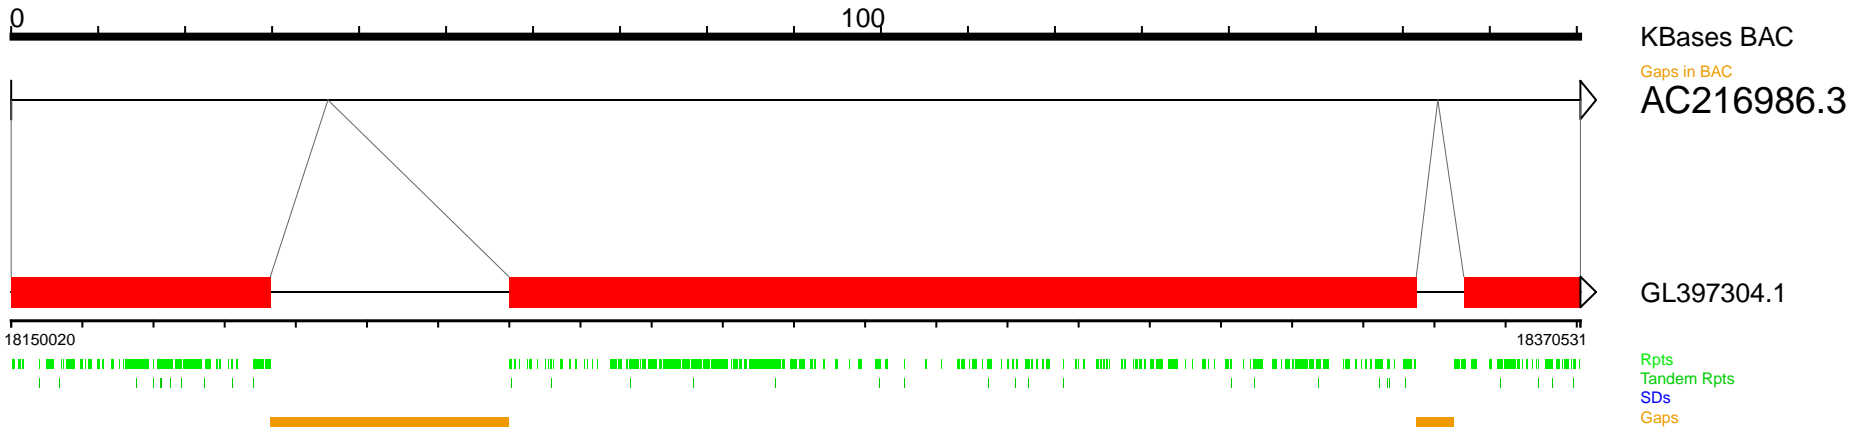

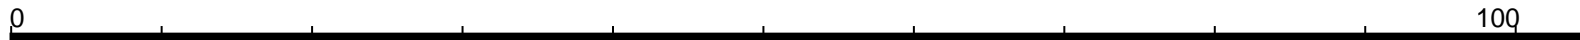

KBases BAC

Gaps in BAC

AC217128.3

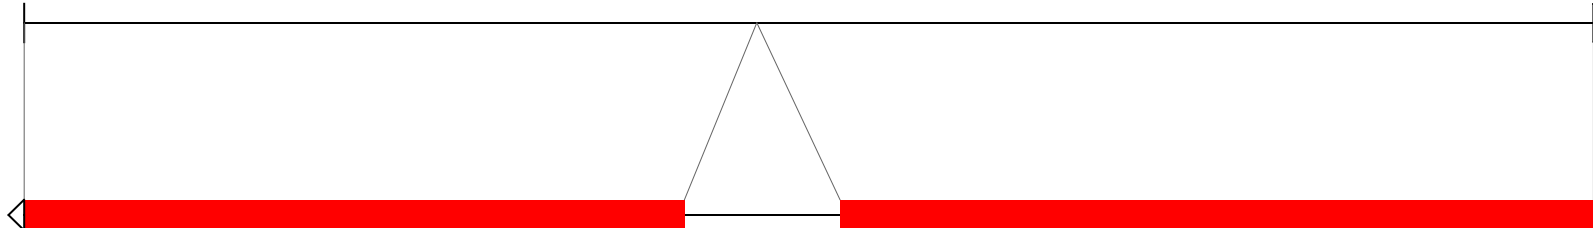

GL397447.1

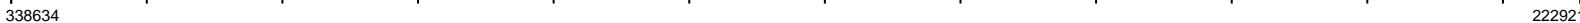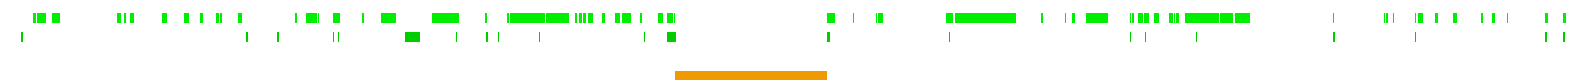

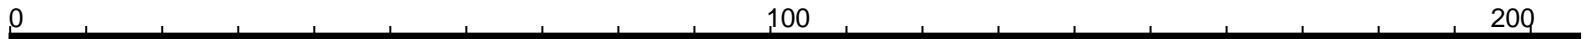

Kbases BAC

Gaps in BAC

AC217222.2

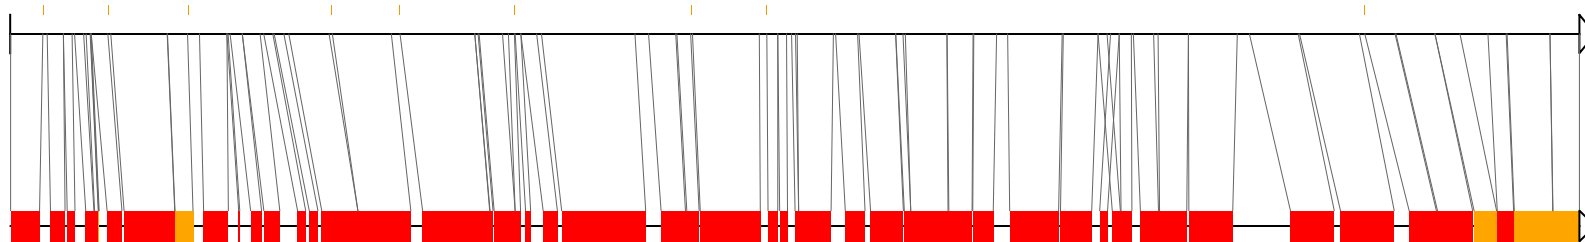

GL397276.1

36857869

37087756

Rpts  
Tandem Rpts  
SDs  
Gaps

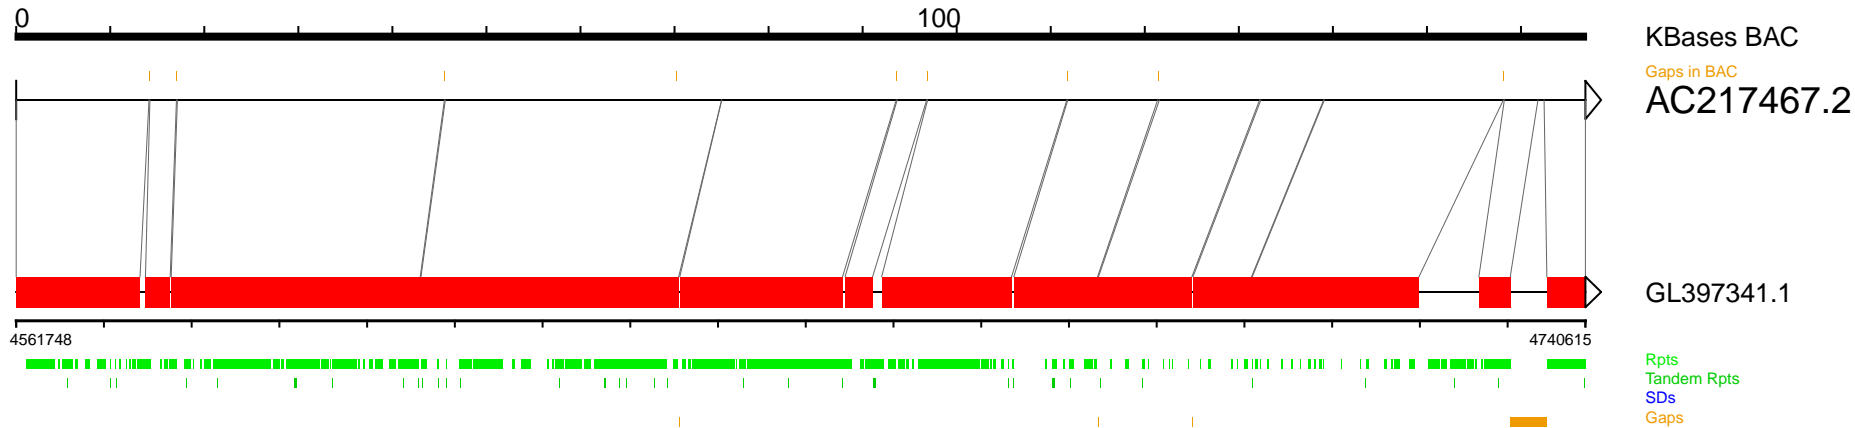

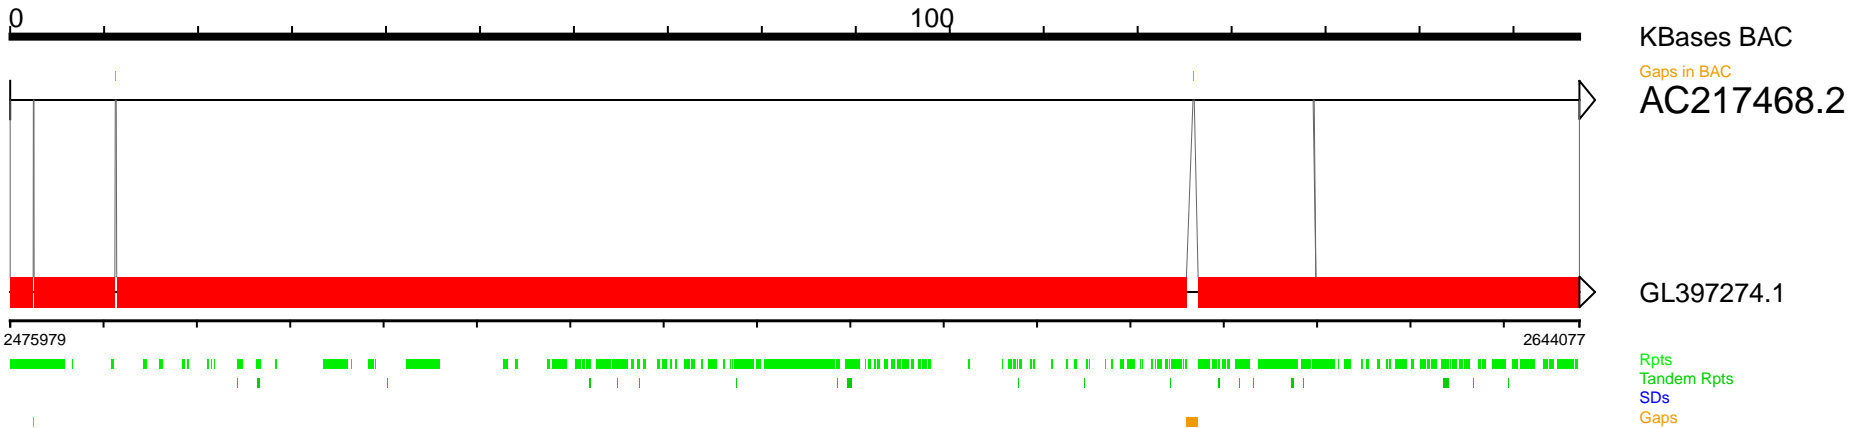

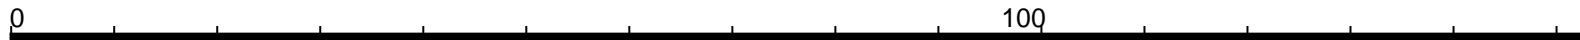

KBases BAC

Gaps in BAC

AC217469.2

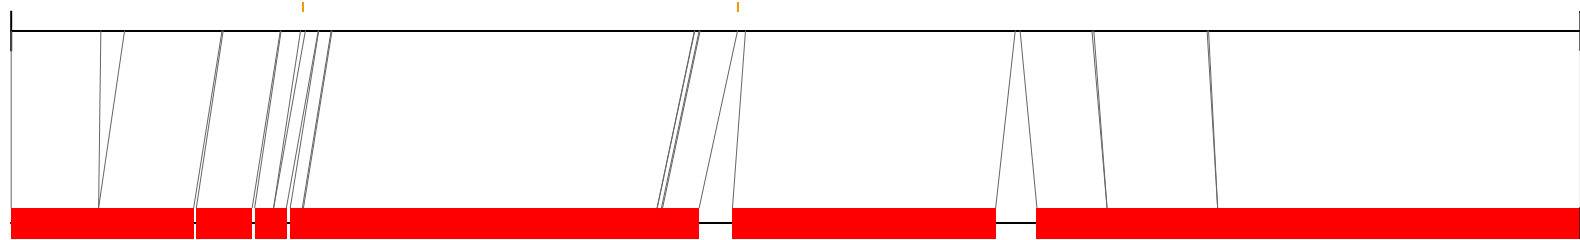

GL397341.1

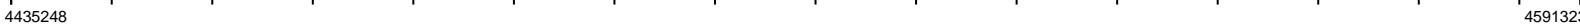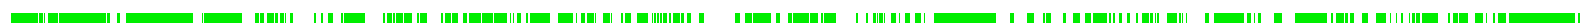

Rpts  
Tandem Rpts  
SDs  
Gaps

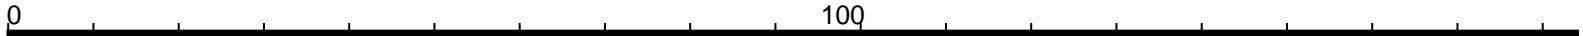

KBases BAC

Gaps in BAC

AC217470.2

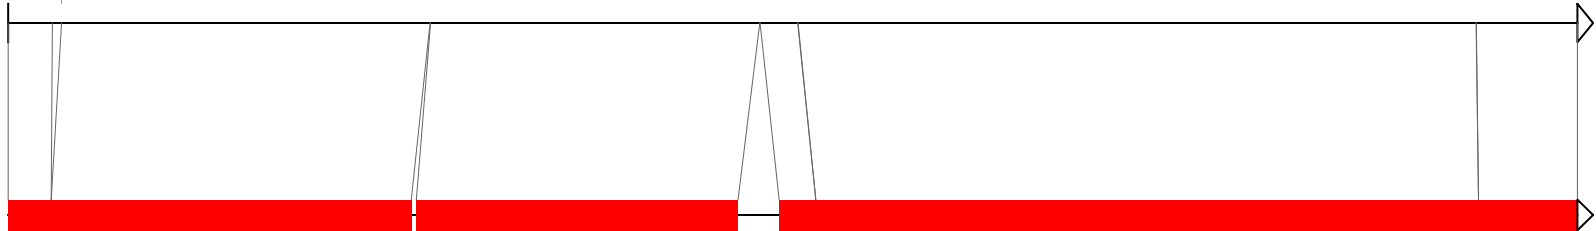

GL397282.1

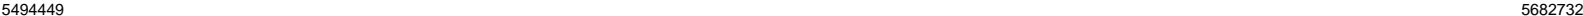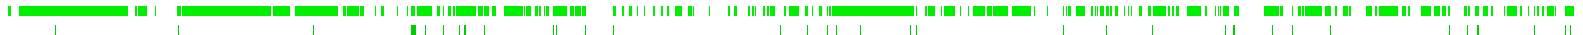

Rpts  
Tandem Rpts  
SDs  
Gaps

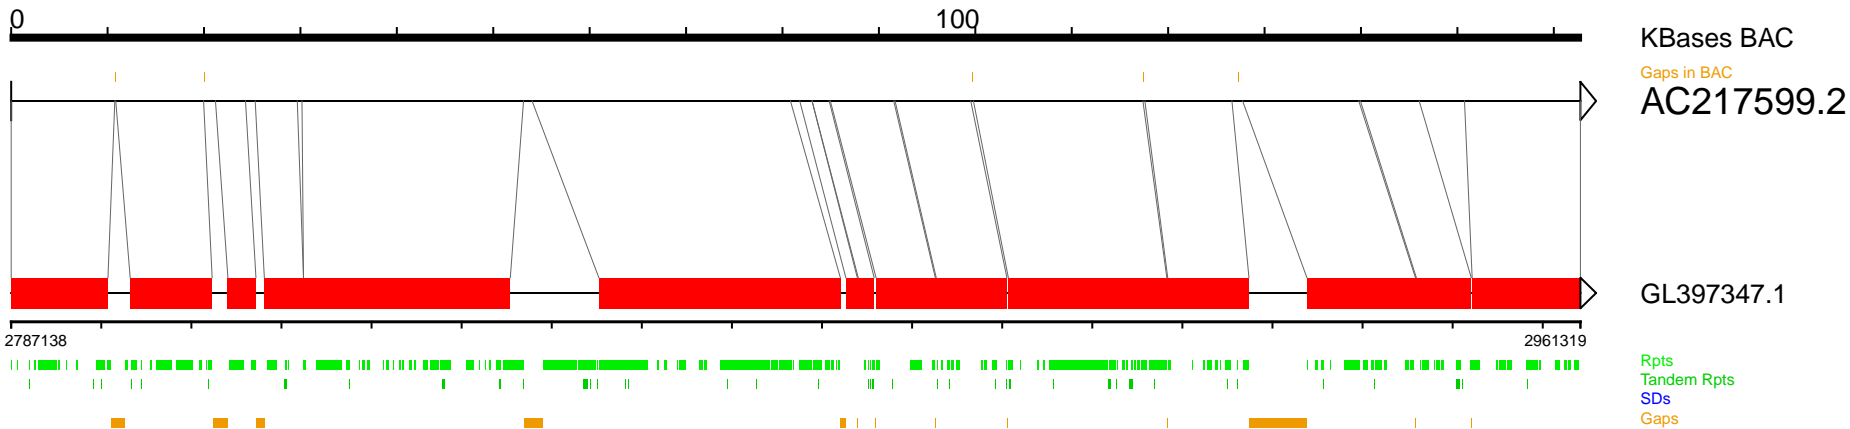

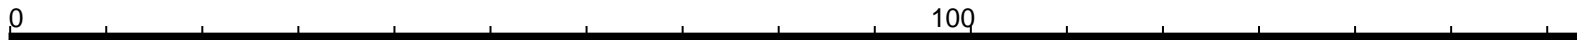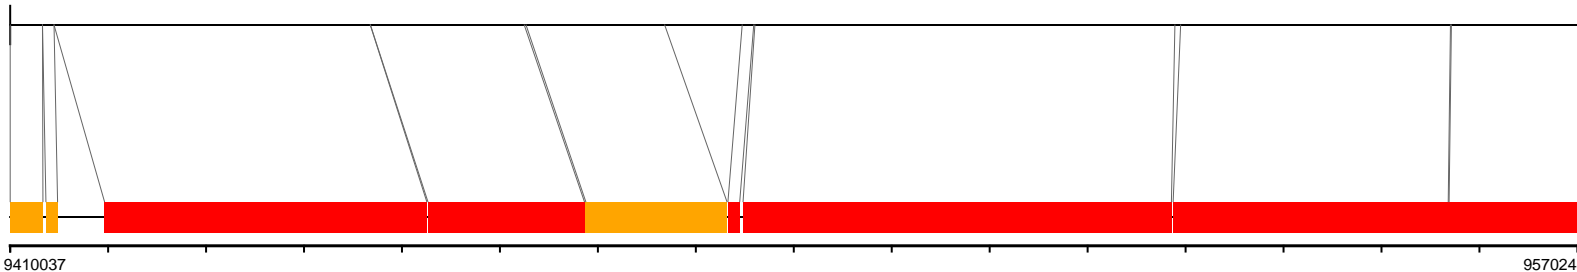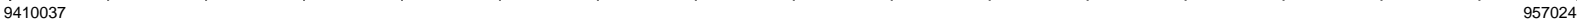

KBases BAC

Gaps in BAC

AC217745.2

GL397342.1

Rpts  
Tandem Rpts  
SDs  
Gaps

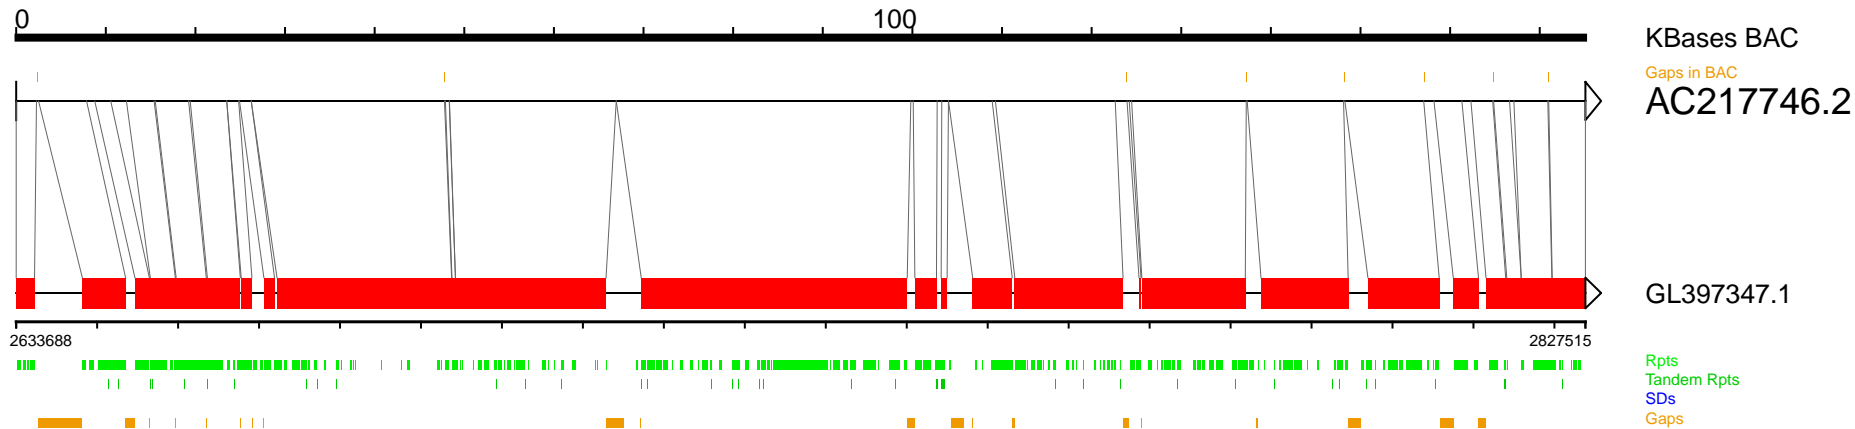

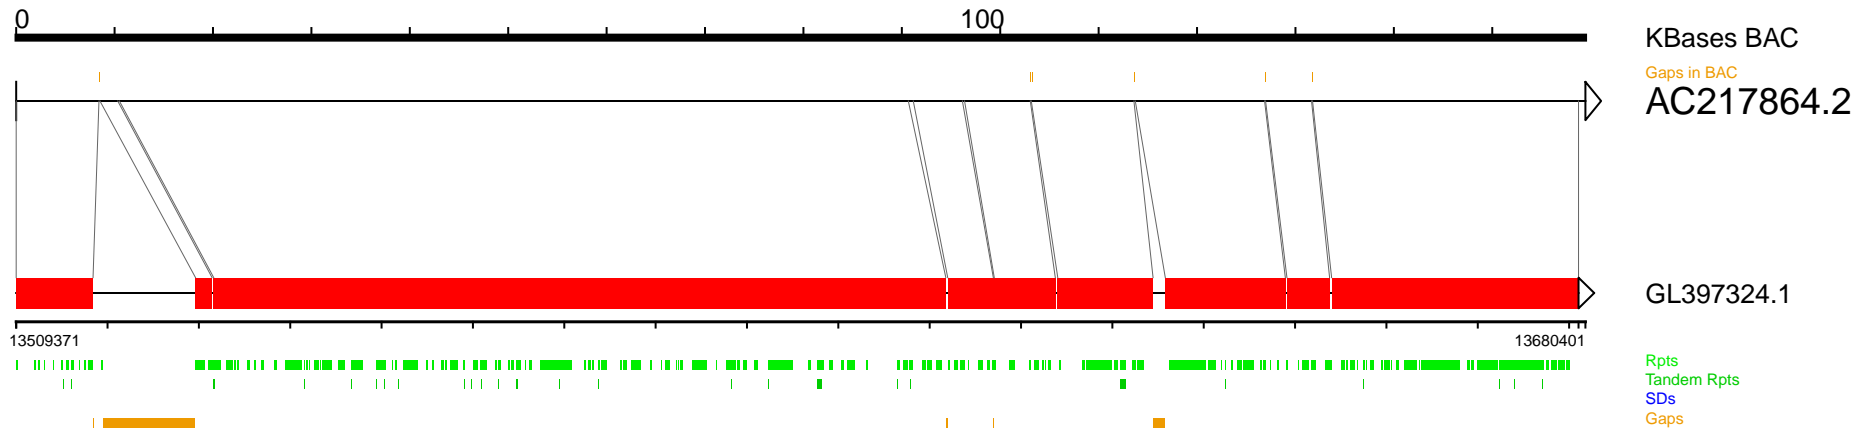

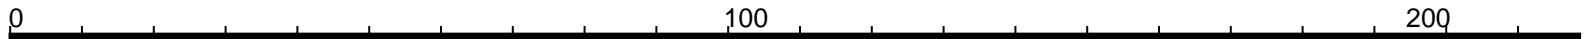

Kbases BAC

Gaps in BAC

AC225266.2

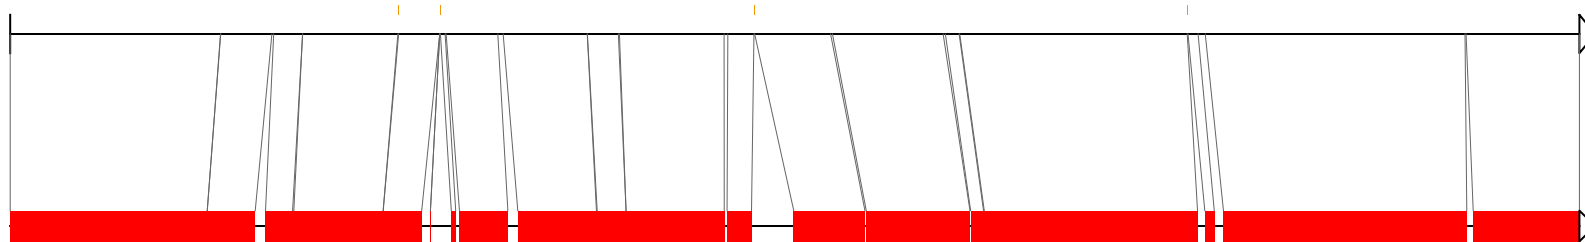

GL397274.1

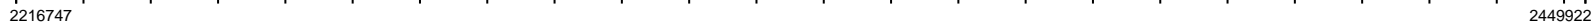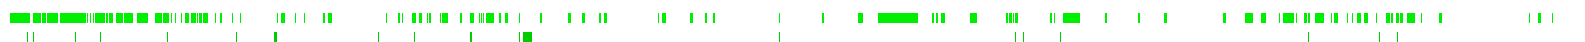

Rpts  
Tandem Rpts  
SDs  
Gaps

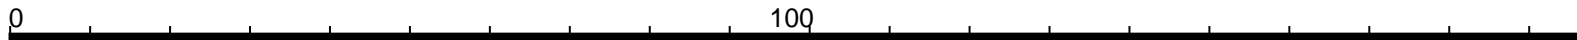

KBases BAC

Gaps in BAC

AC225315.3

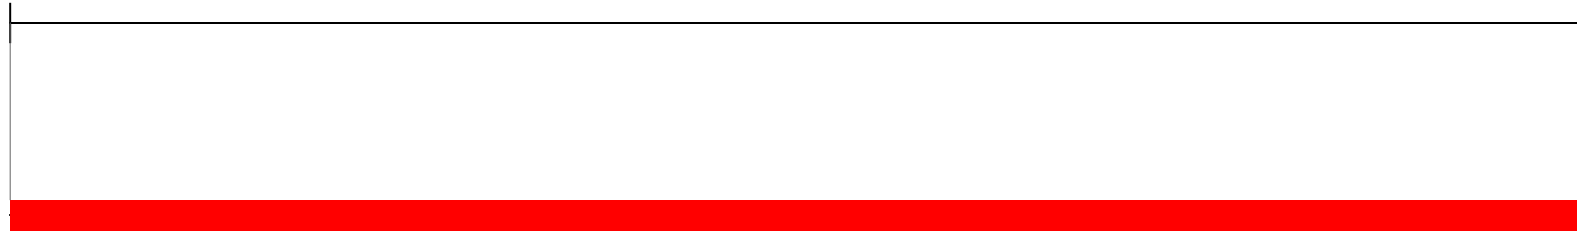

GL397270.1

30958009 31154221

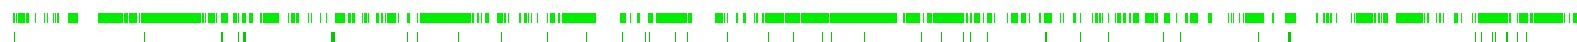

Rpts  
Tandem Rpts  
SDs  
Gaps

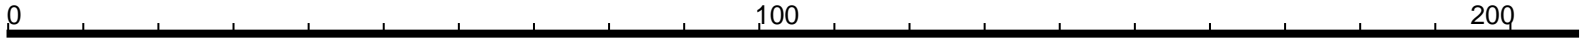

KBases BAC

Gaps in BAC

AC225372.3

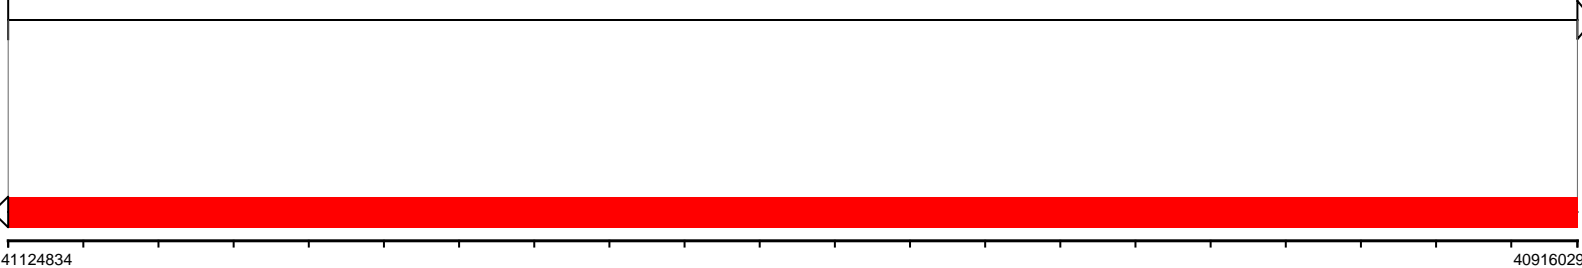

GL397269.1

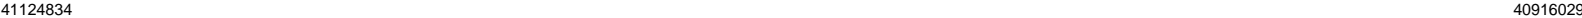

Rpts  
Tandem Rpts  
SDs  
Gaps

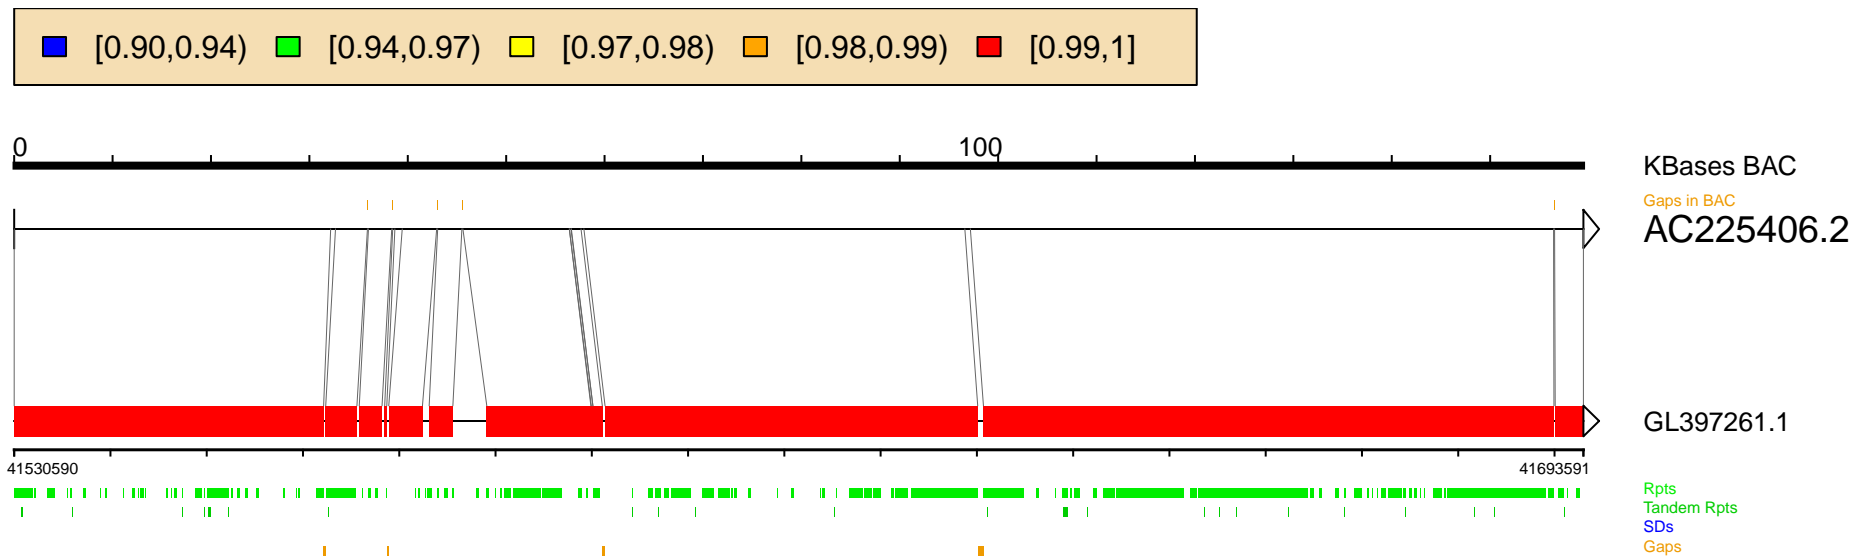

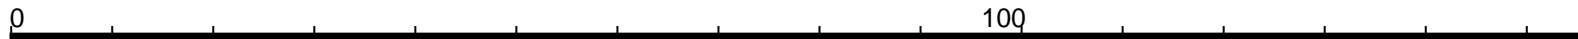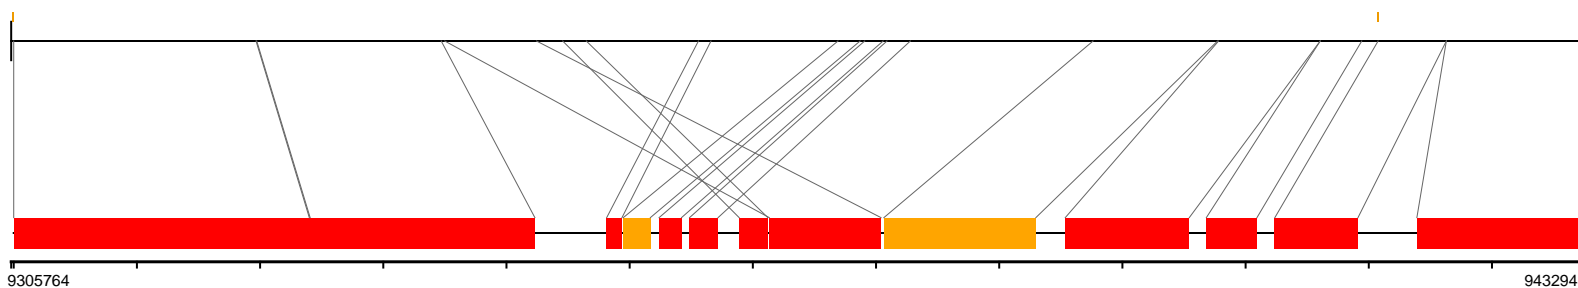

9305764

9432943

Kbases BAC

Gaps in BAC

AC225662.2

GL397342.1

Rpts  
Tandem Rpts  
SDs  
Gaps

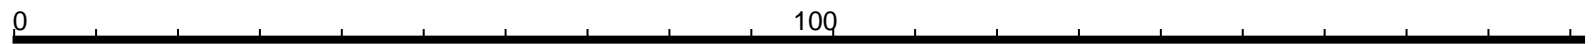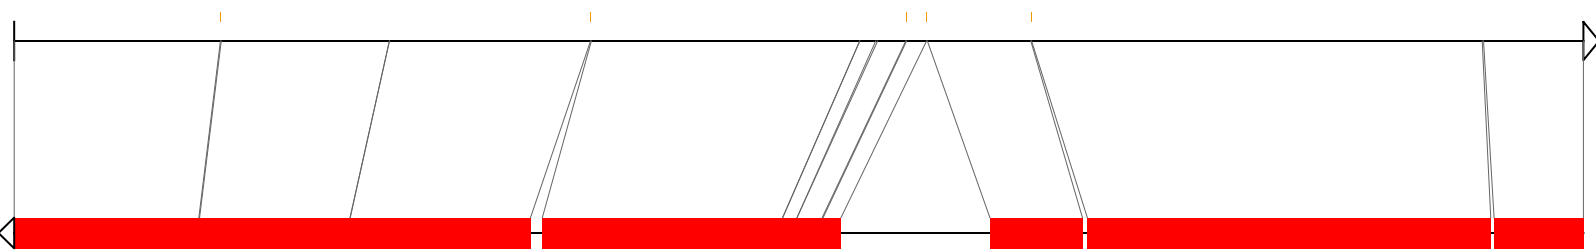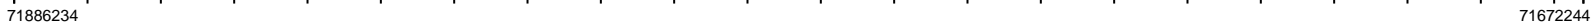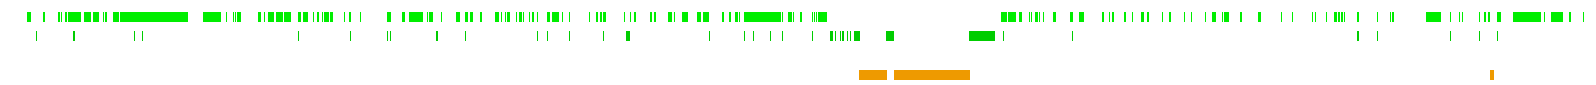

Kbases BAC  
AC231299.3

GL397261.1

Rpts  
Tandem Rpts  
SDs  
Gaps

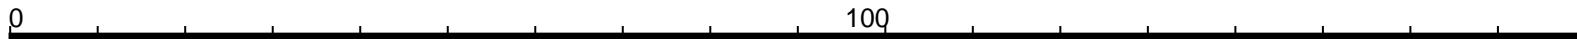

KBases BAC

Gaps in BAC

AC231300.2

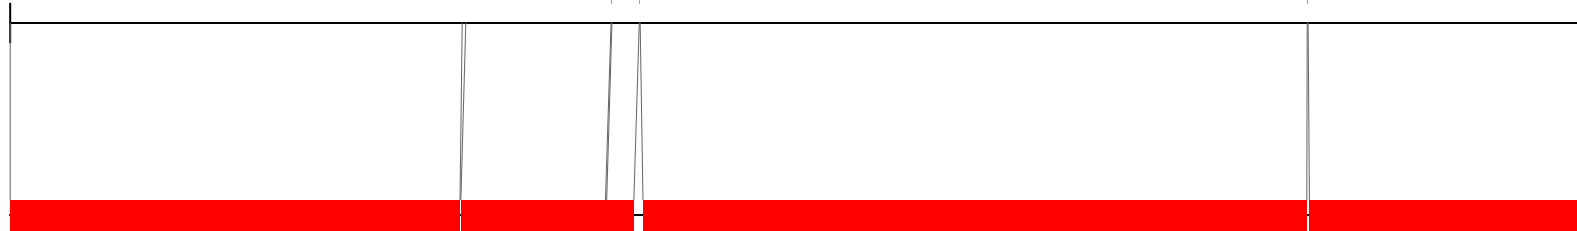

GL397261.1

41676008

41856171

Rpts  
Tandem Rpts  
SDs  
Gaps

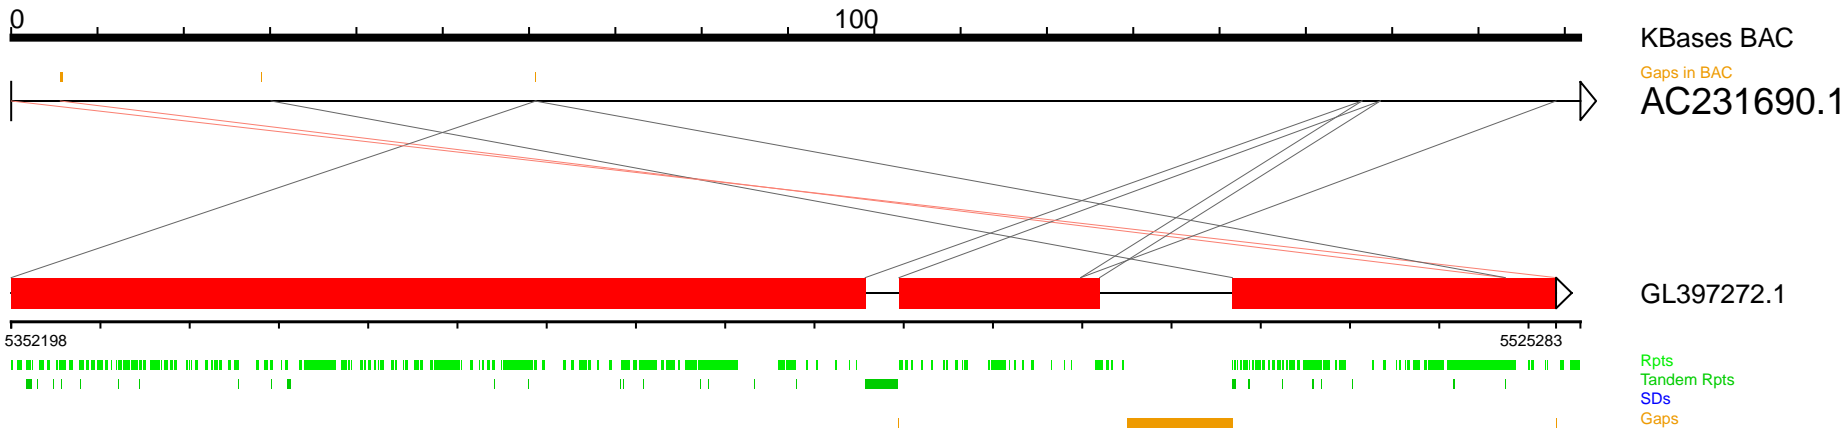

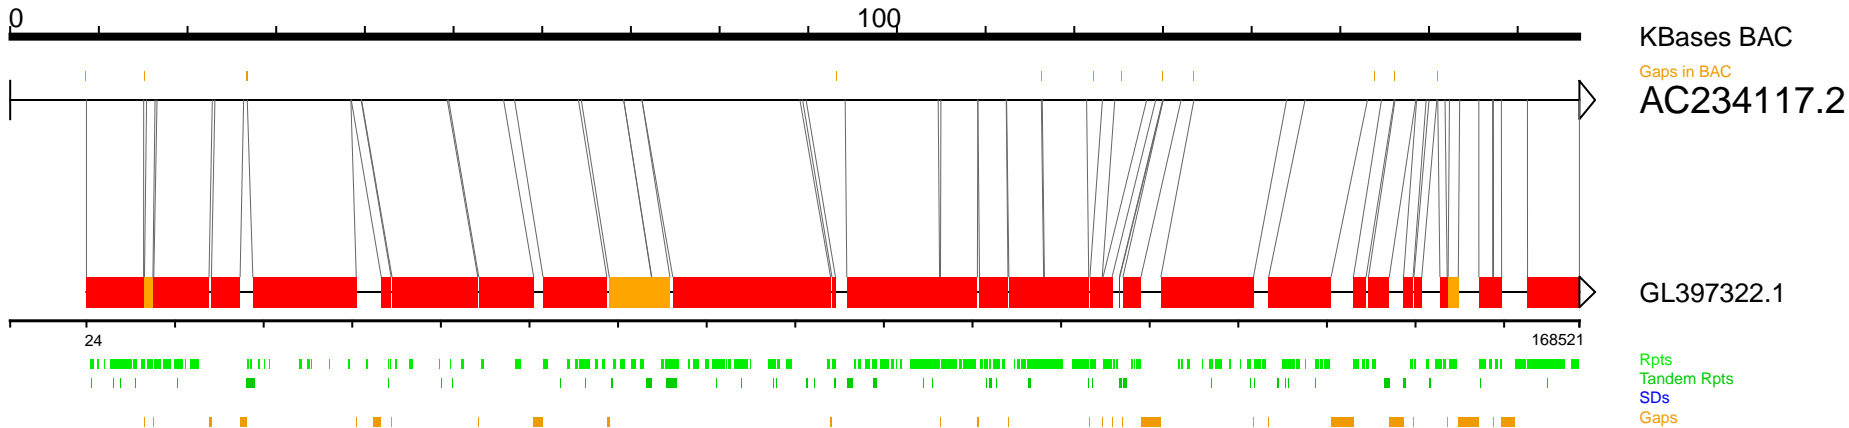

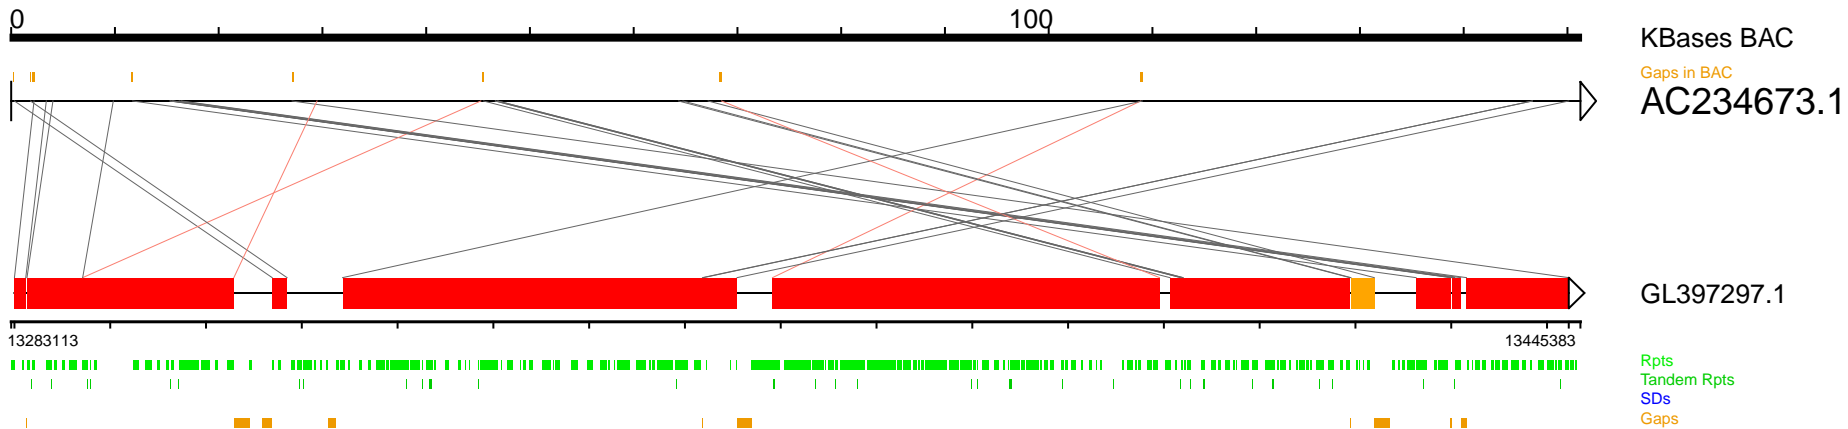

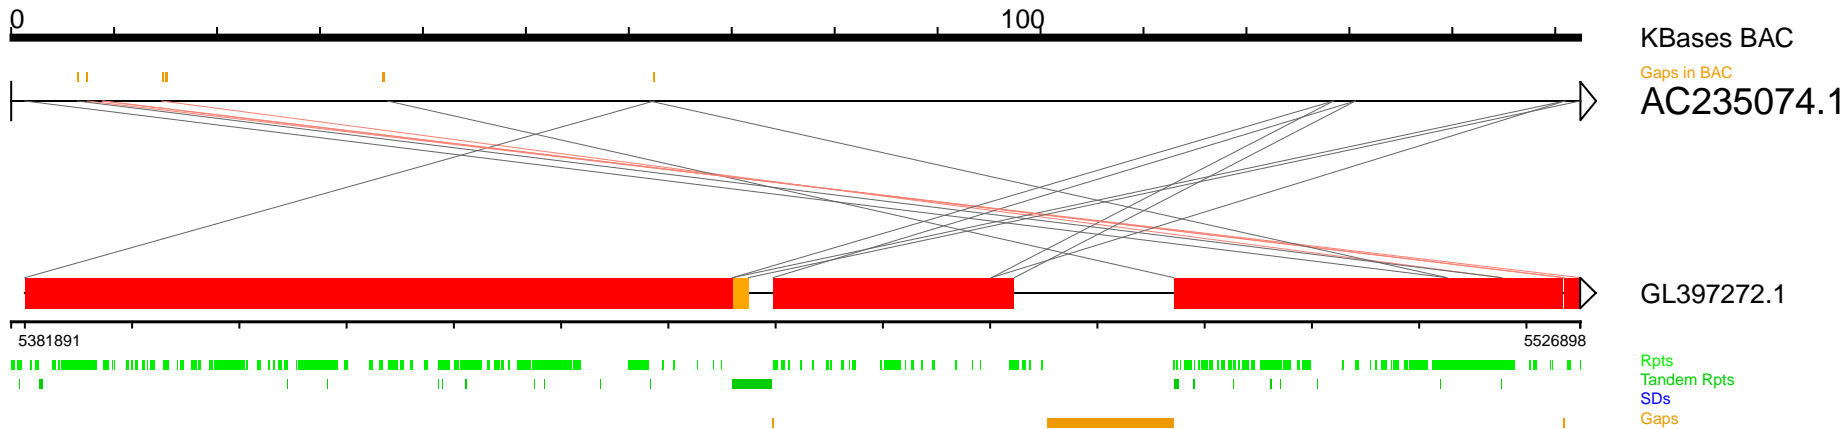

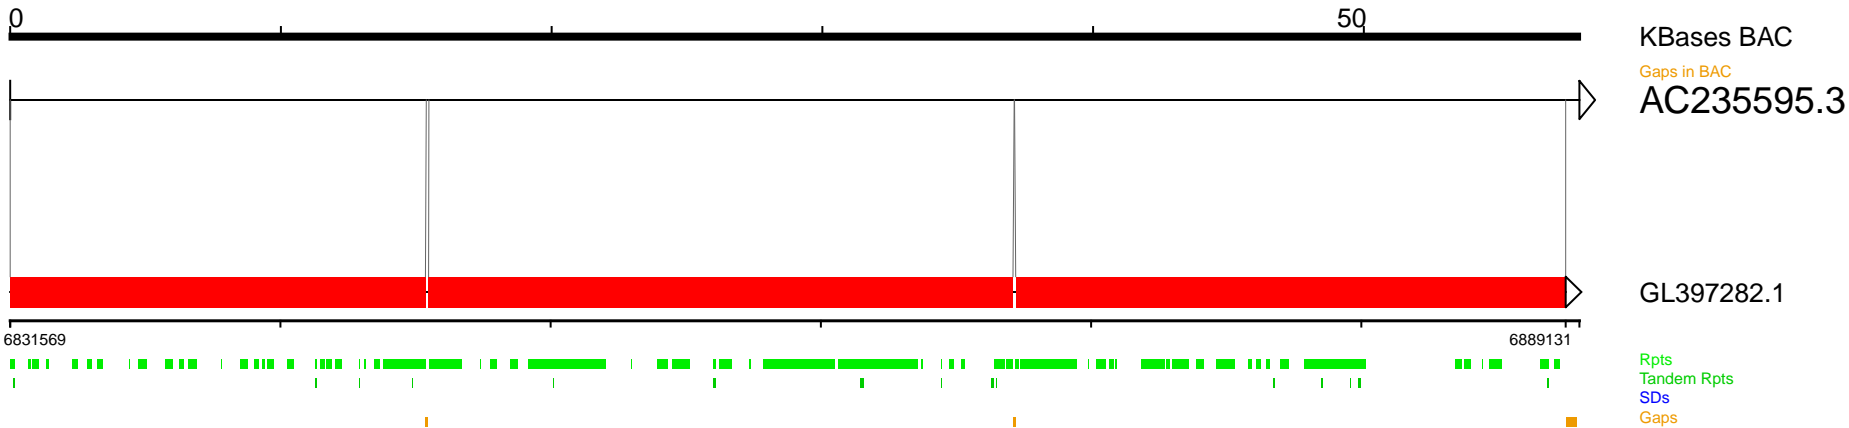

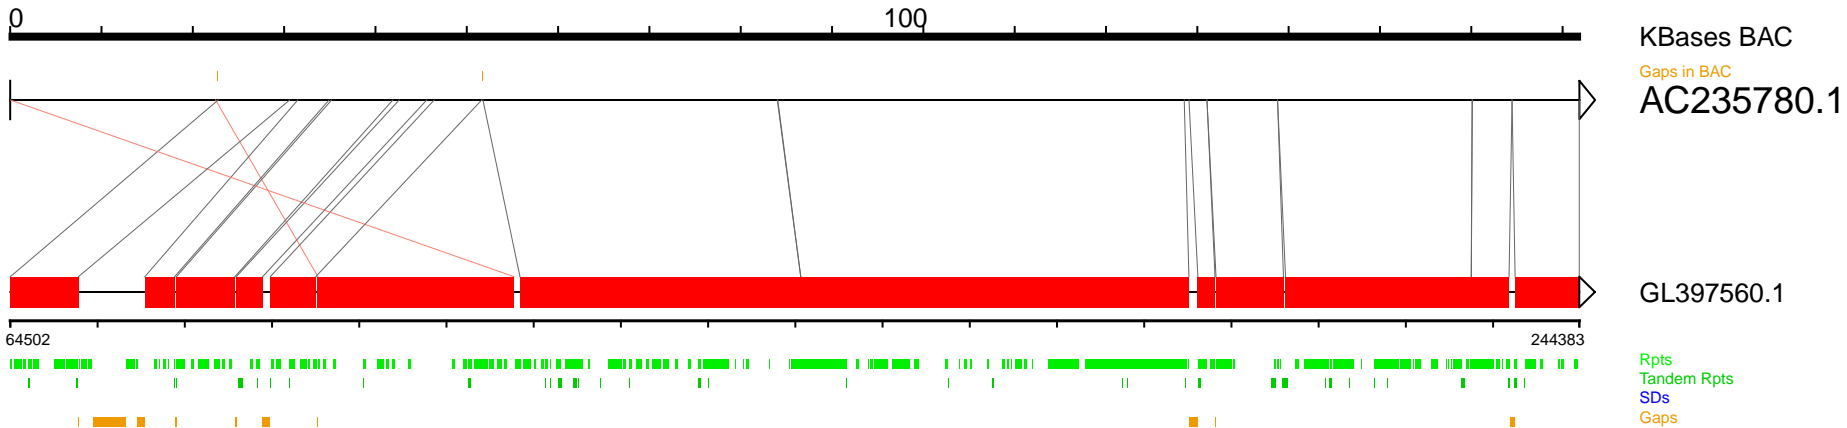

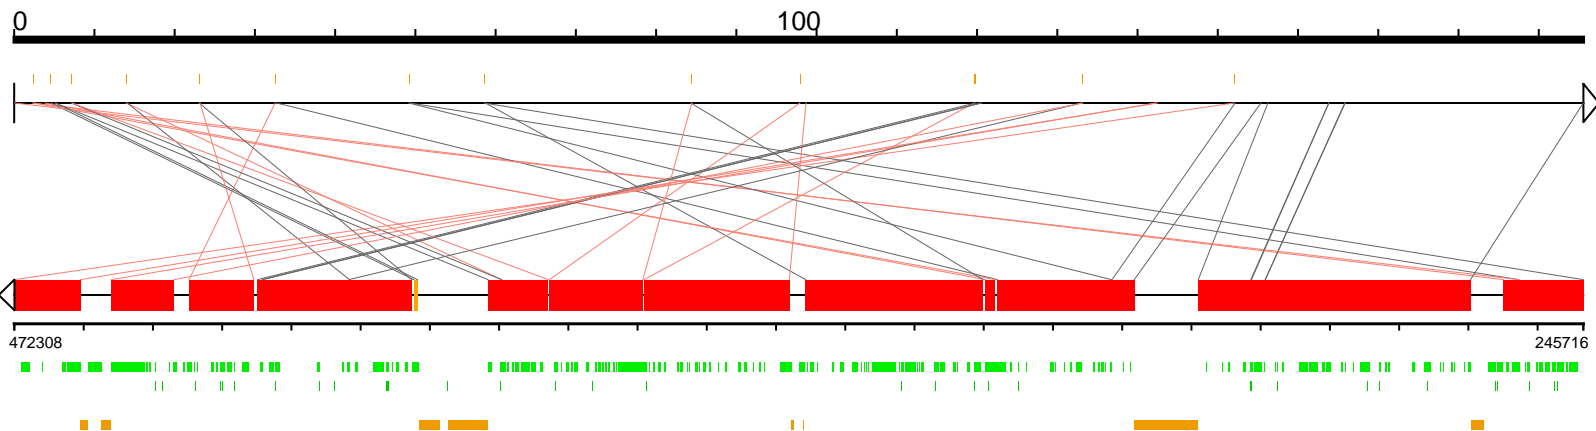

KBases BAC  
AC236810.2

GL397311.1

Rpts  
Tandem Rpts  
SDs  
Gaps

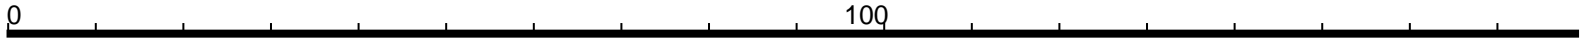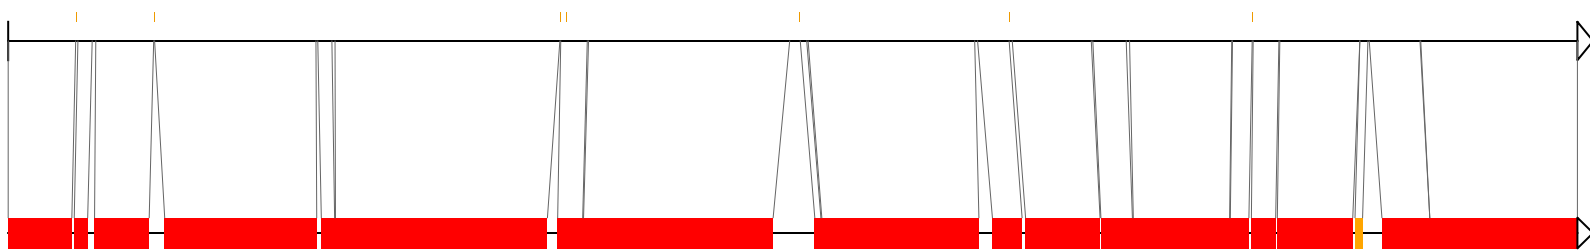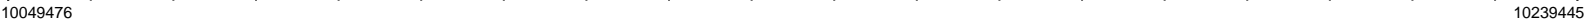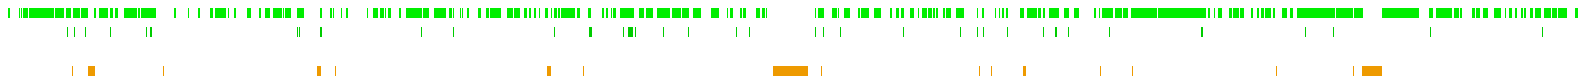

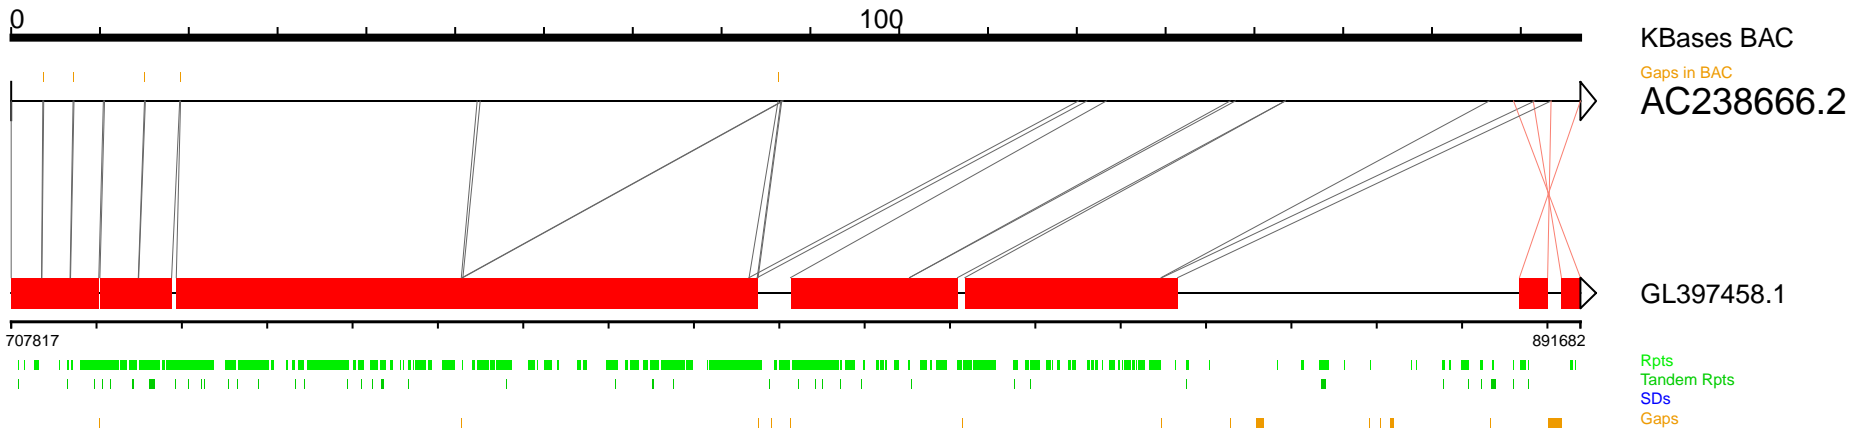

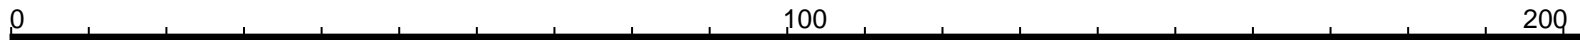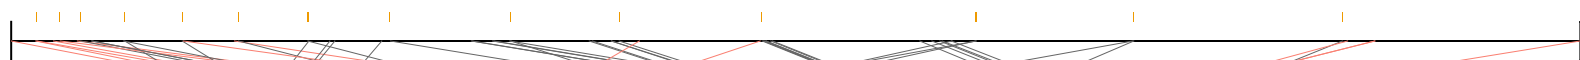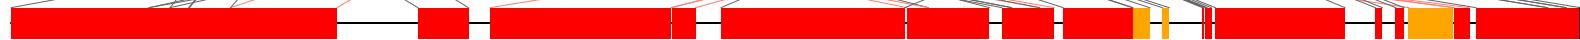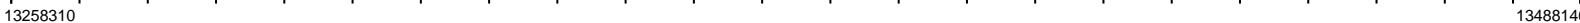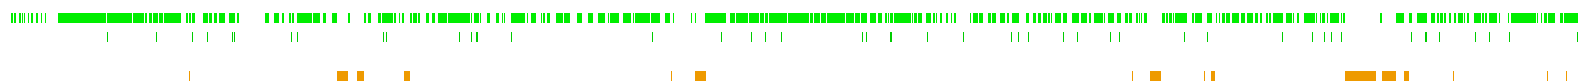

Kbases BAC  
AC239767.1

GL397297.1

Rpts  
Tandem Rpts  
SDs  
Gaps

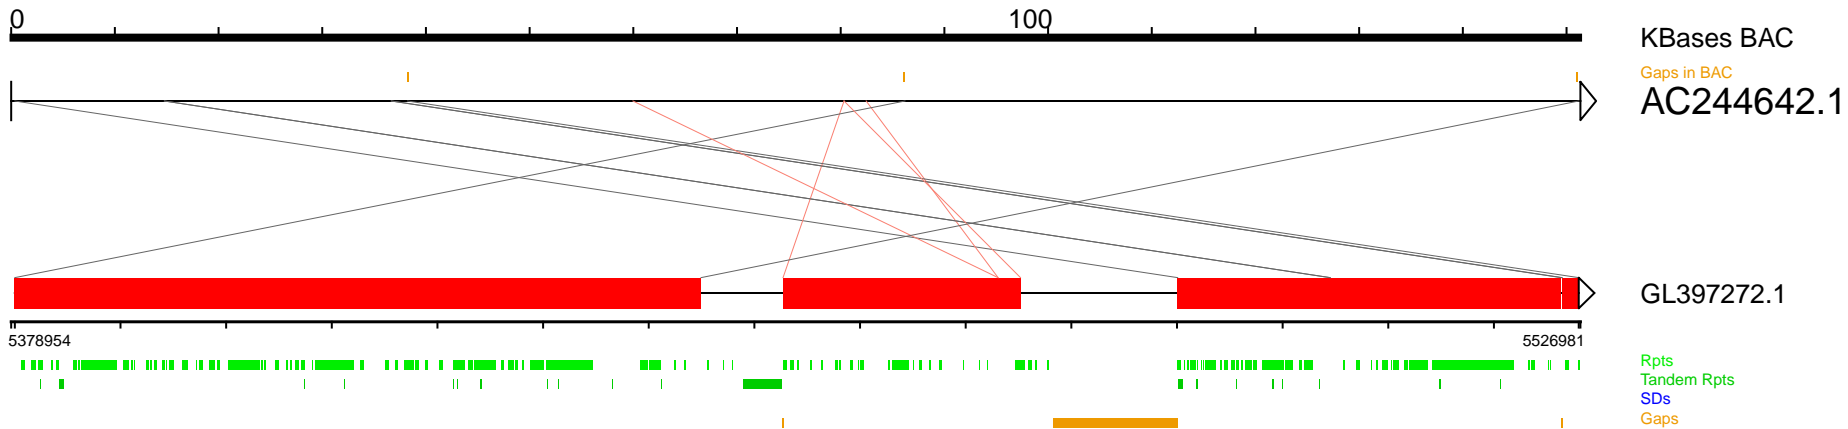

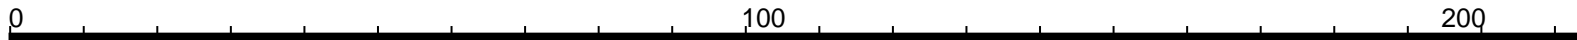

KBases BAC

Gaps in BAC

CT954289.3

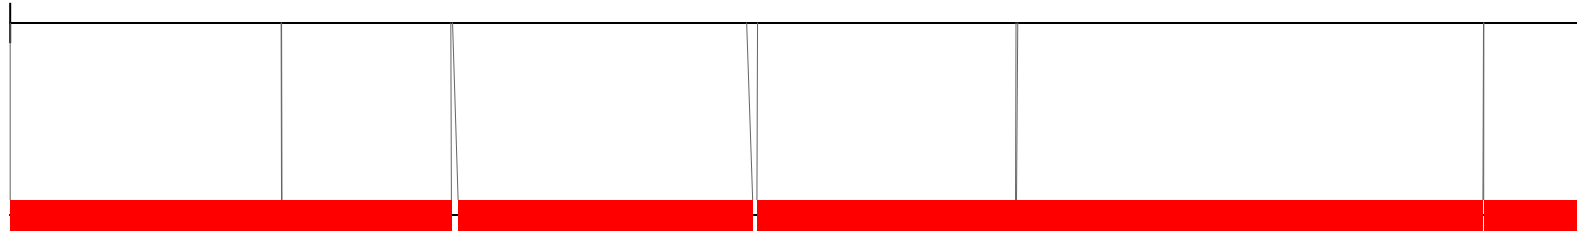

GL397267.1

28711194

28924203

Rpts  
Tandem Rpts  
SDs  
Gaps

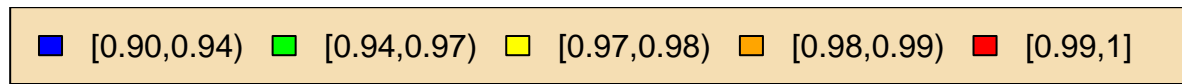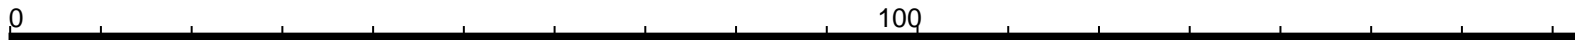

KBases BAC

Gaps in BAC

CT954292.2

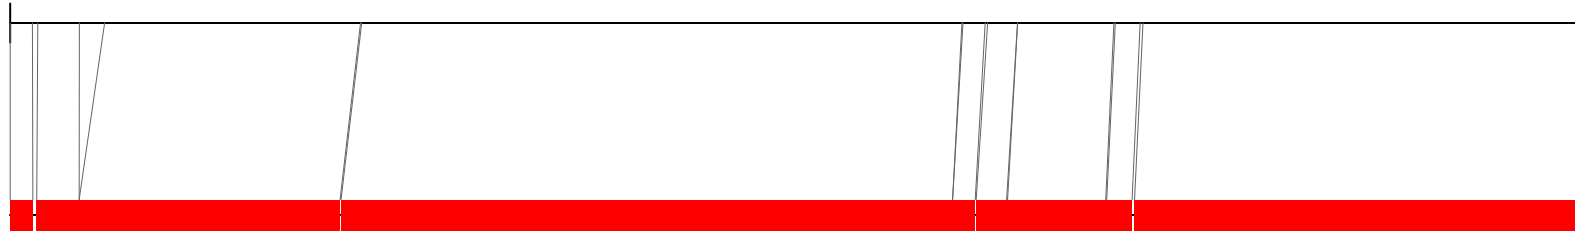

GL397314.1

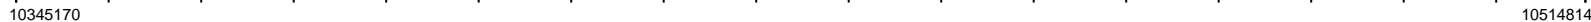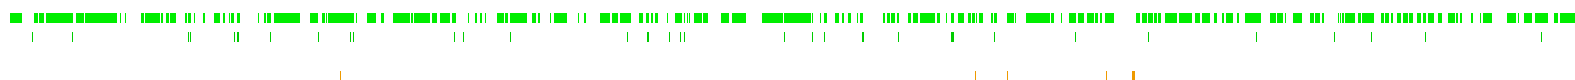

Rpts  
Tandem Rpts  
SDs  
Gaps

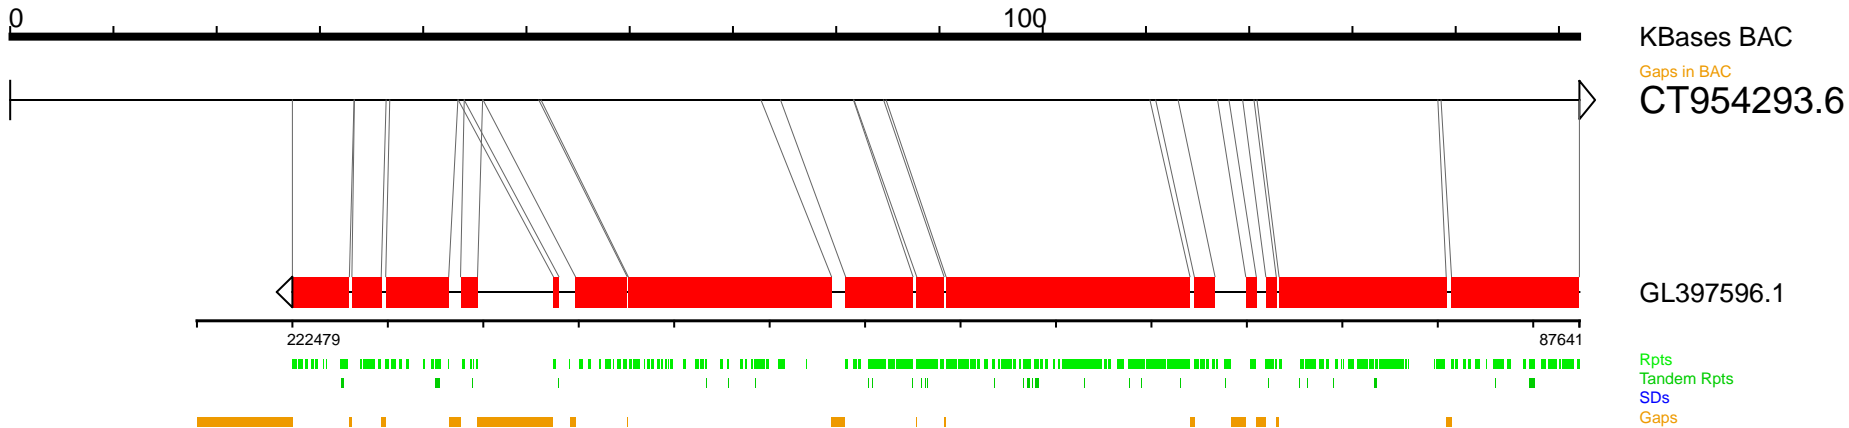

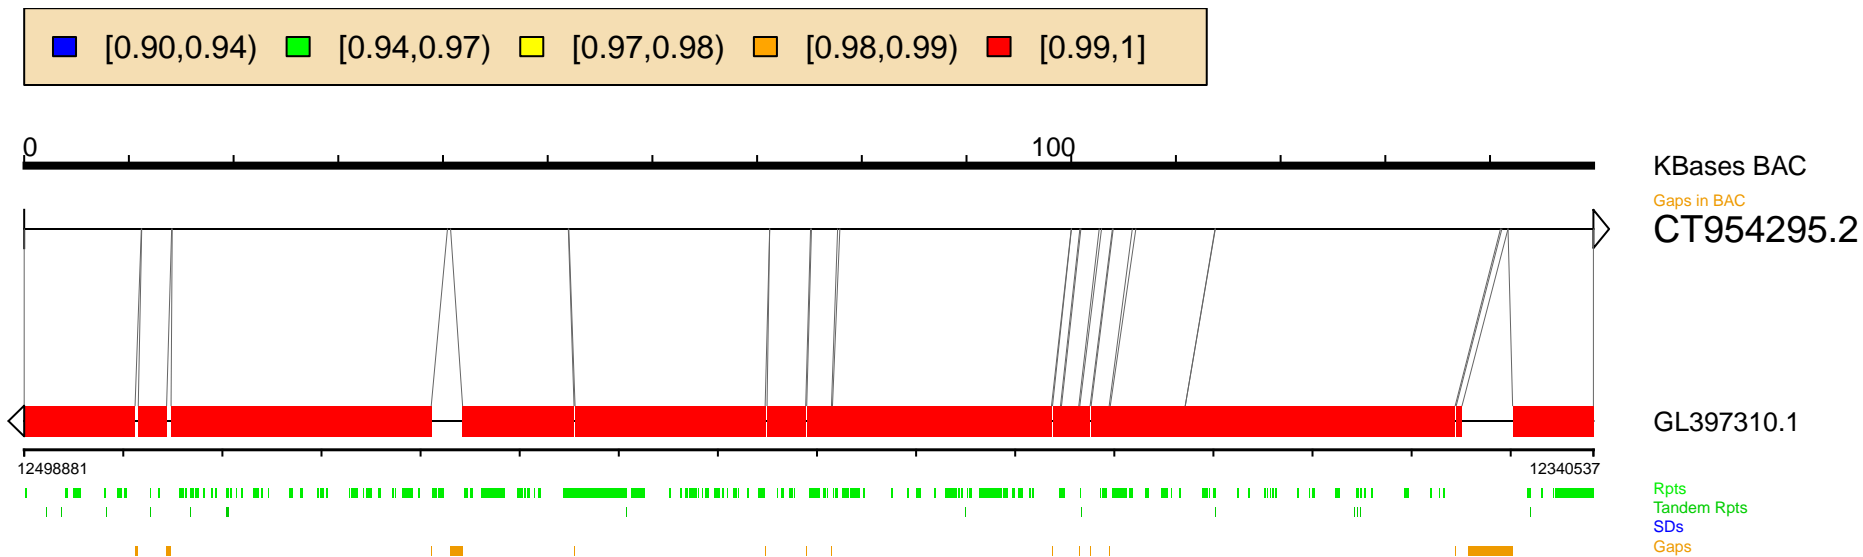

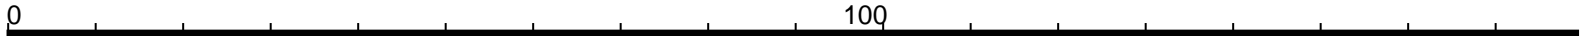

KBases BAC

Gaps in BAC

CT954299.8

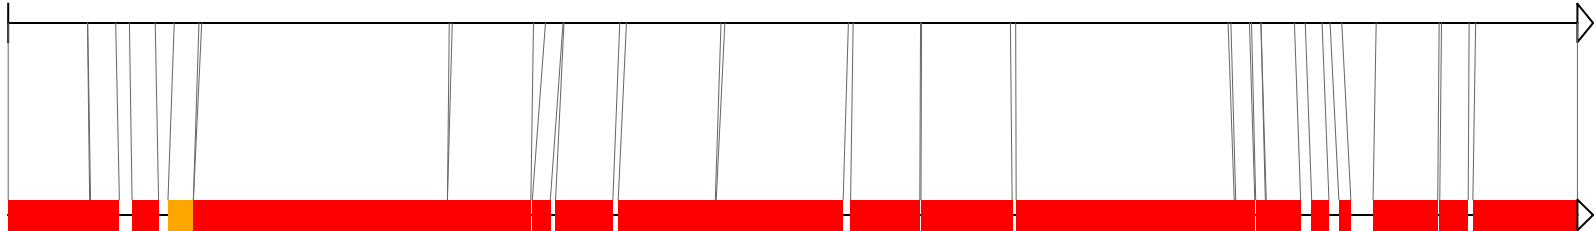

GL397534.1

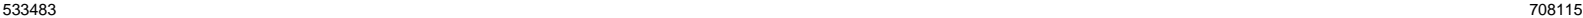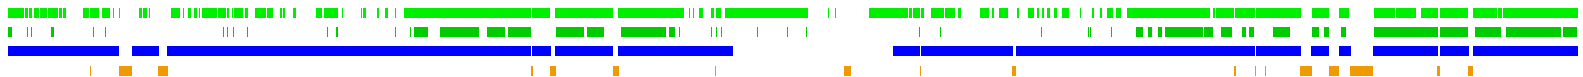

Rpts  
Tandem Rpts  
SDs  
Gaps

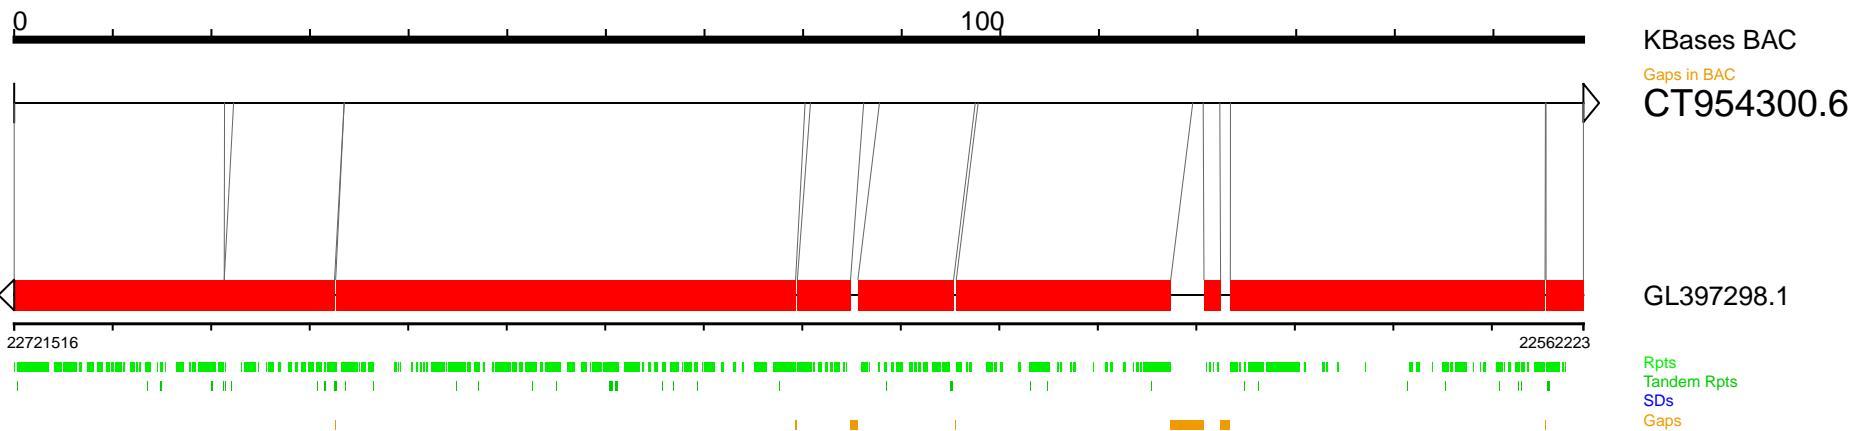

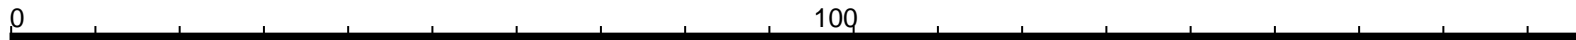

KBases BAC

Gaps in BAC

CT954301.7

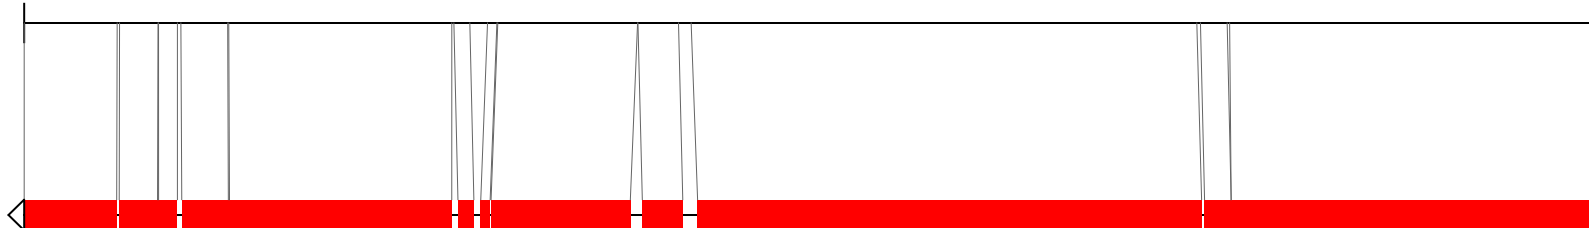

GL397275.1

32163199 31976284

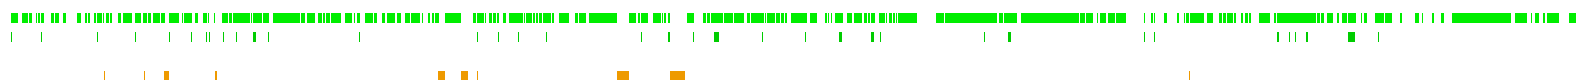

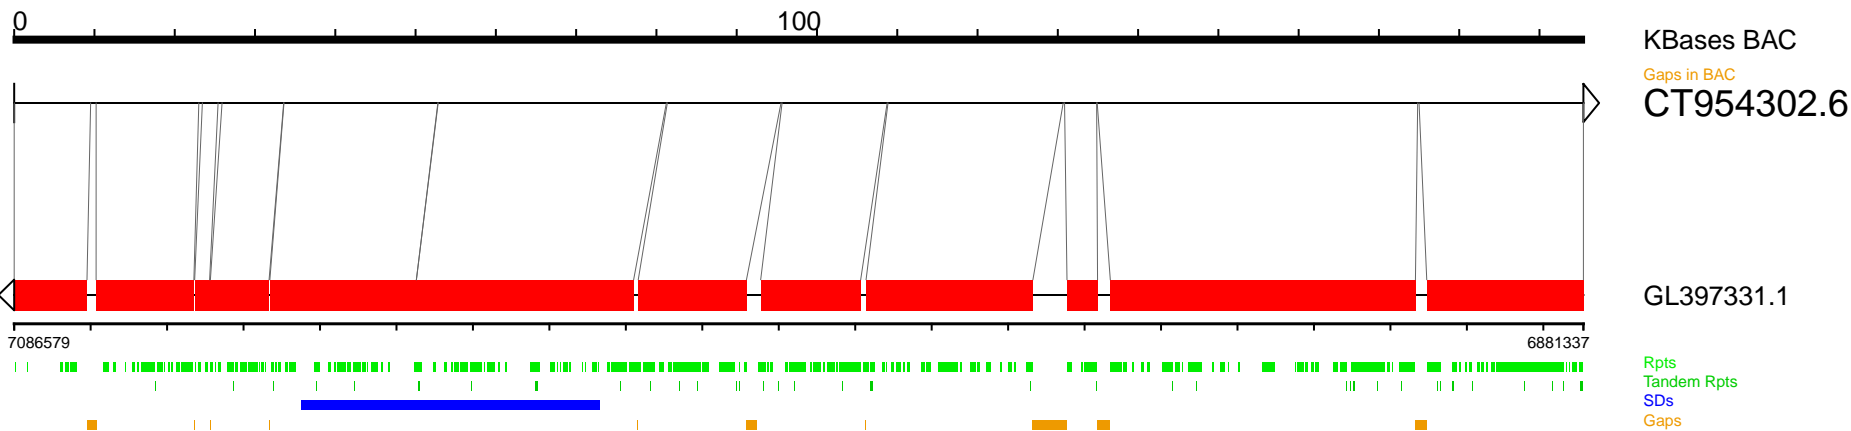

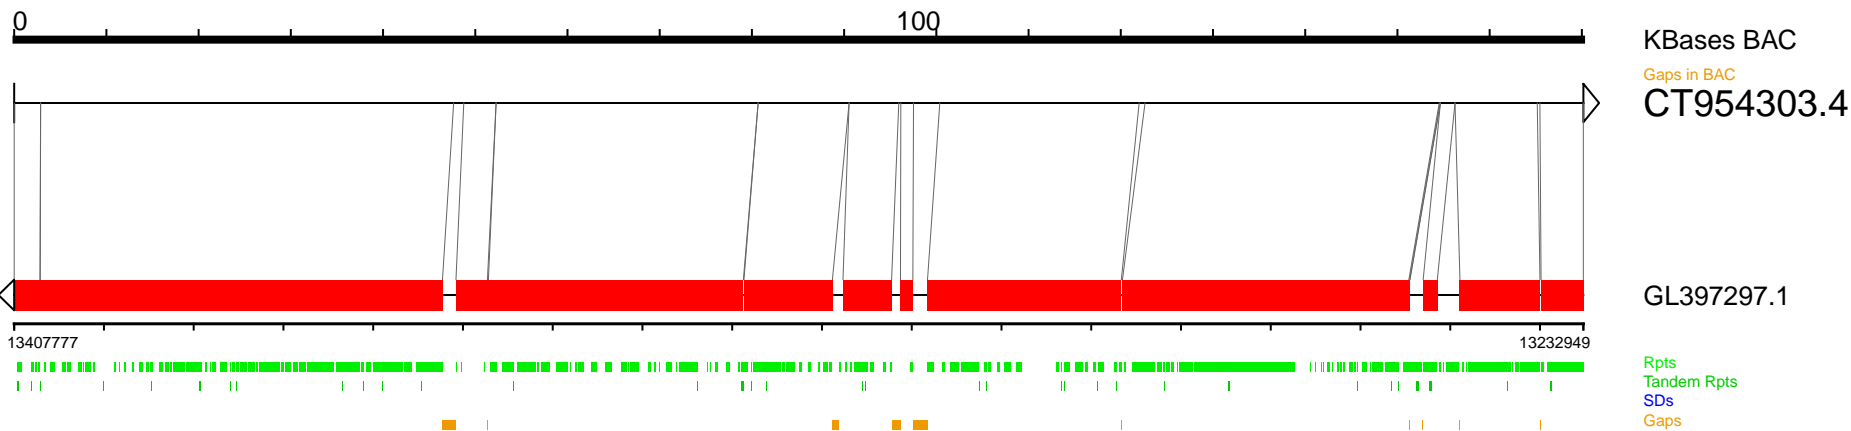

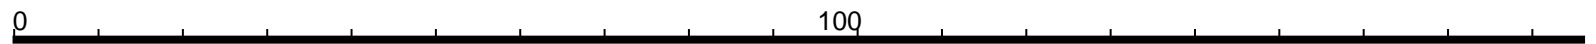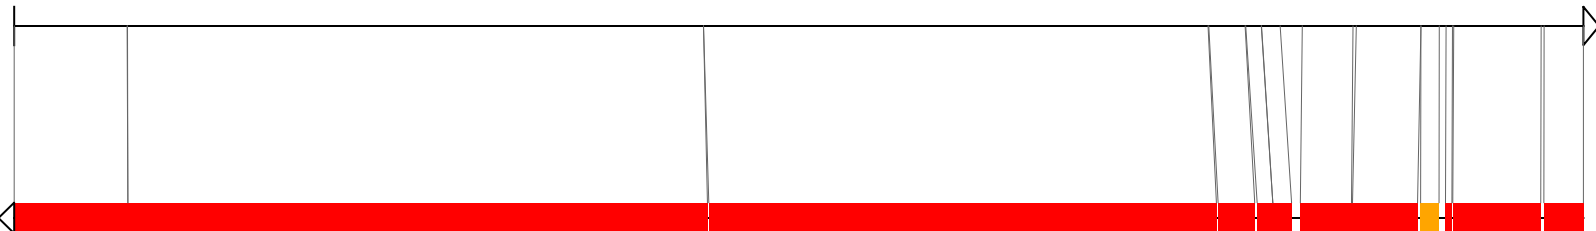

Kbases BAC  
Gaps in BAC  
CT954304.8

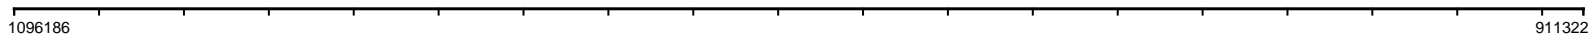

GL397368.1

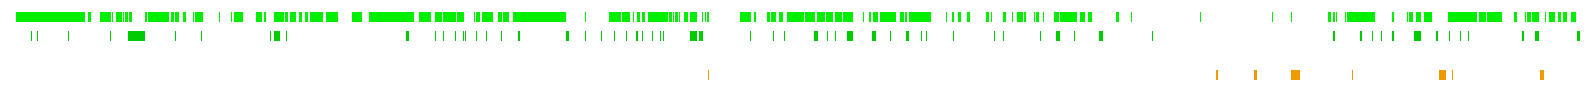

Rpts  
Tandem Rpts  
SDs  
Gaps

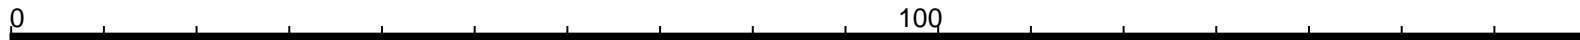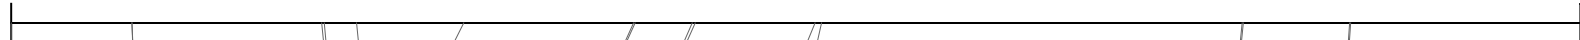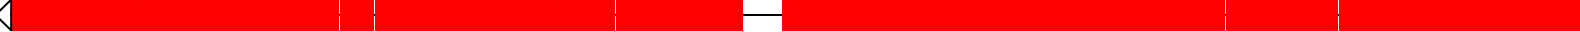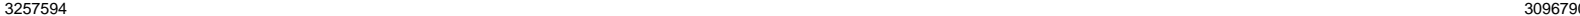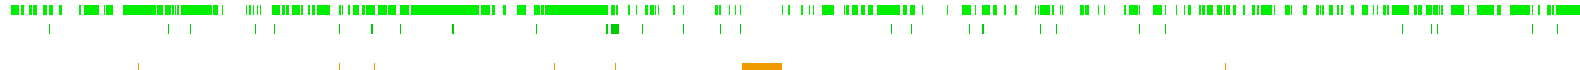

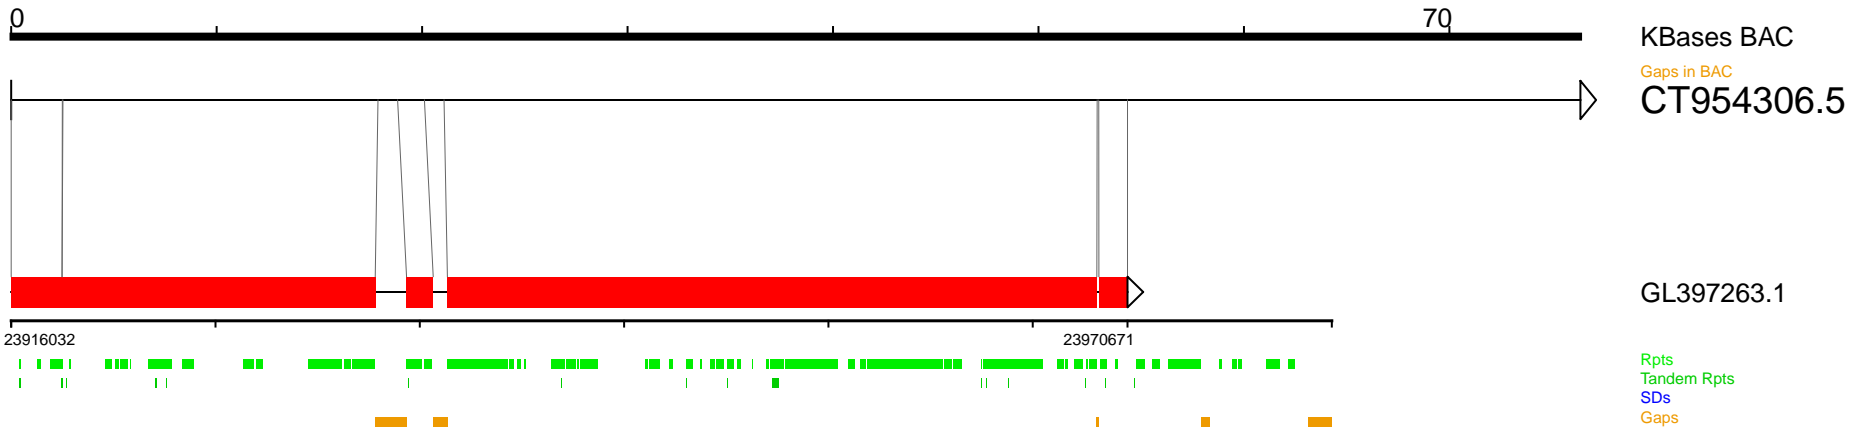

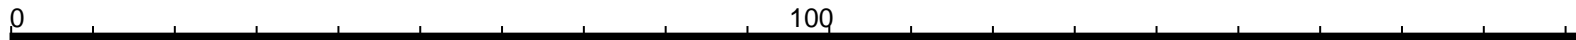

KBases BAC

Gaps in BAC

CT954310.8

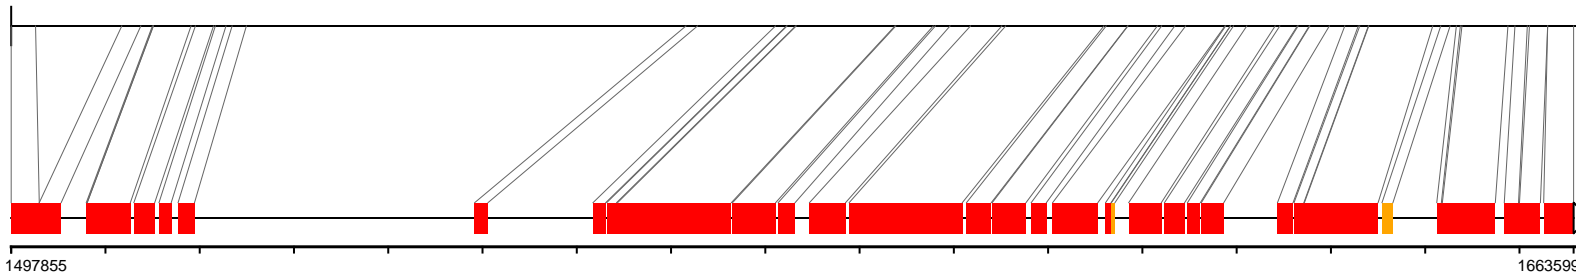

GL397399.1

Rpts  
Tandem Rpts  
SDs  
Gaps

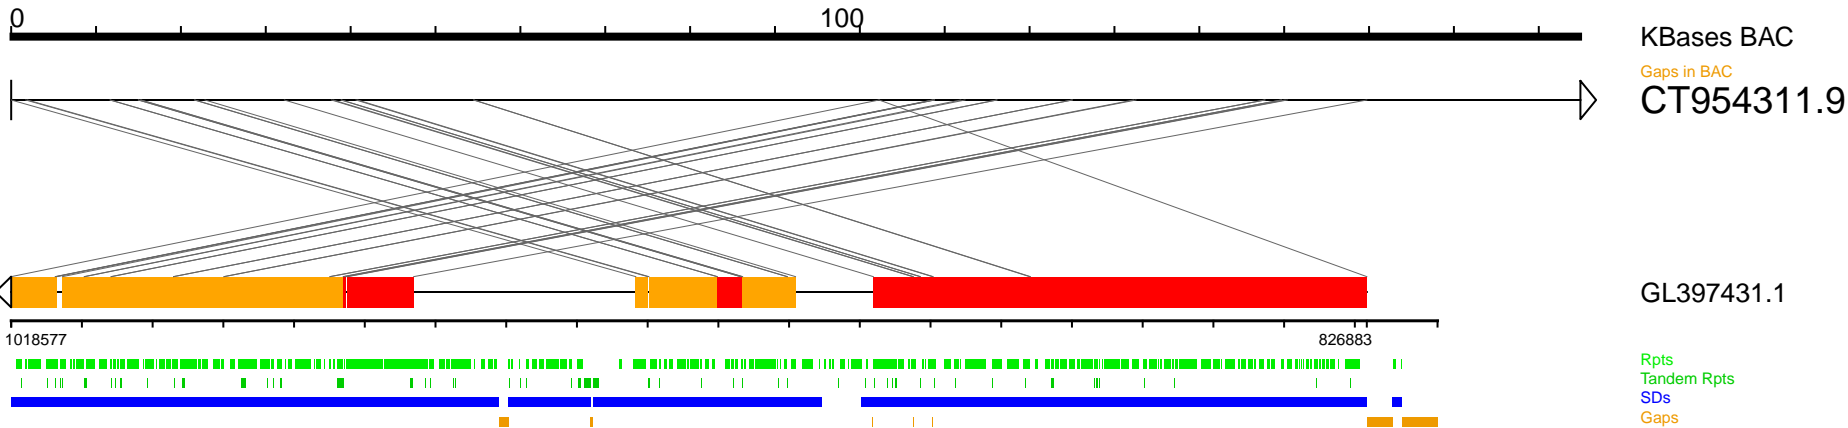

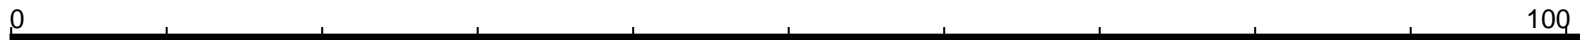

KBases BAC

Gaps in BAC

CT954314.7

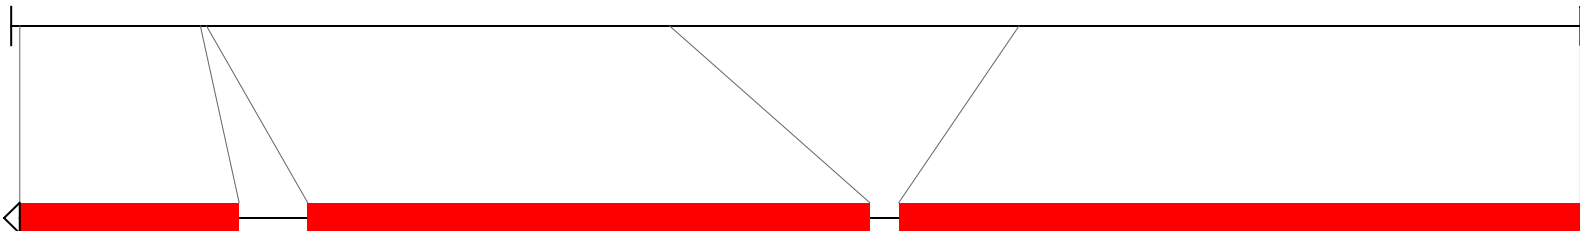

GL397526.1

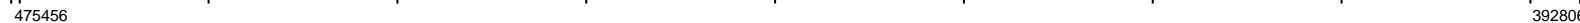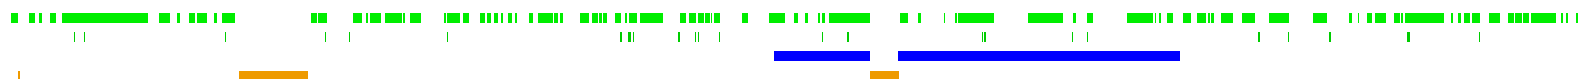

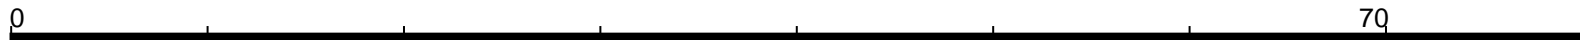

KBases BAC

Gaps in BAC

CT954315.7



GL397303.1

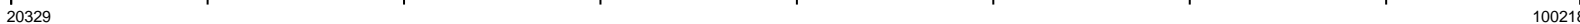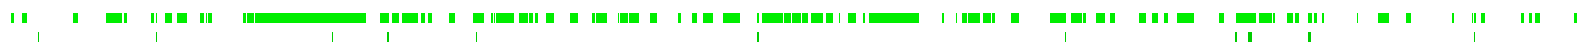

Rpts  
Tandem Rpts  
SDs  
Gaps

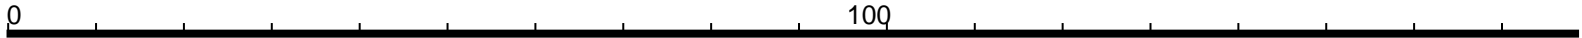

KBases BAC

Gaps in BAC

CT954316.4

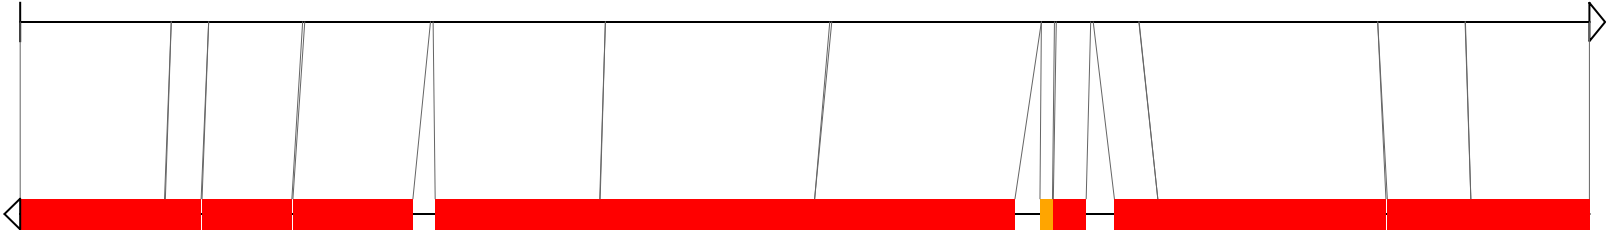

GL397263.1

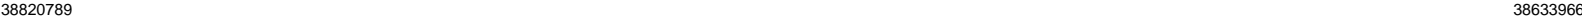

Rpts  
Tandem Rpts  
SDs  
Gaps

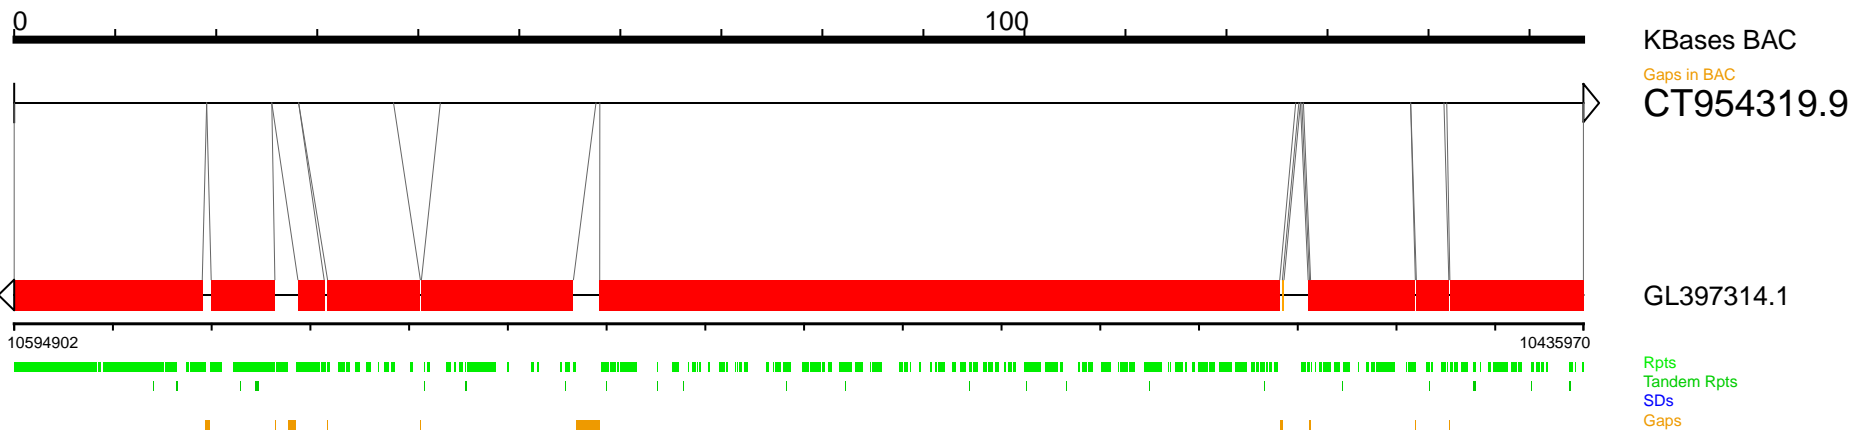

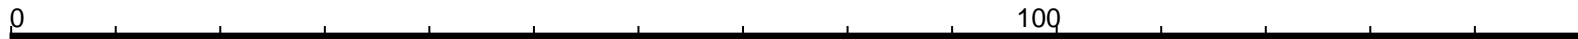

KBases BAC

Gaps in BAC

CT954321.3

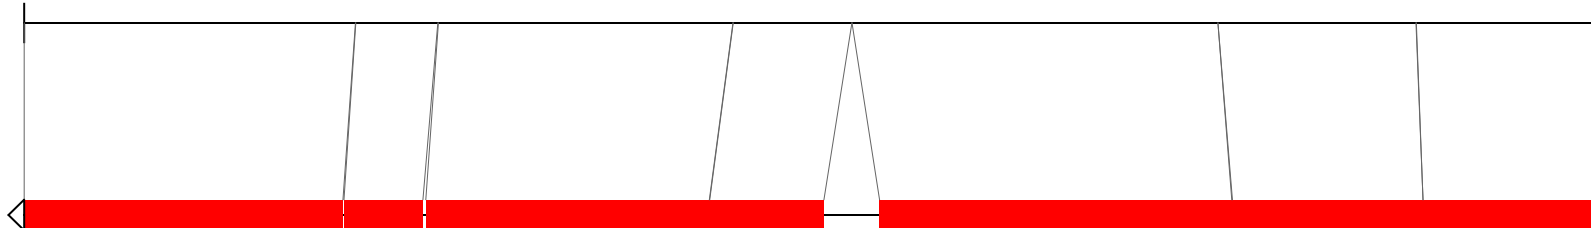

GL397261.1

11464326 11308384

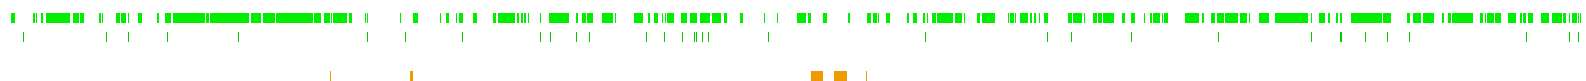

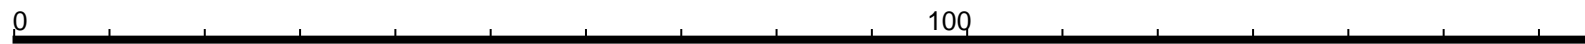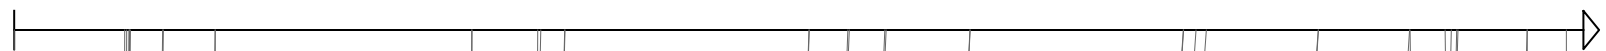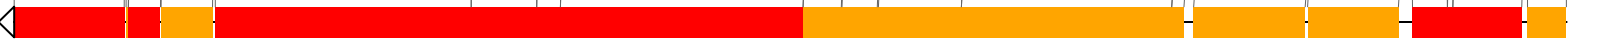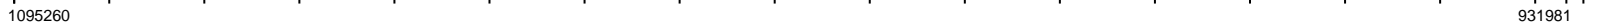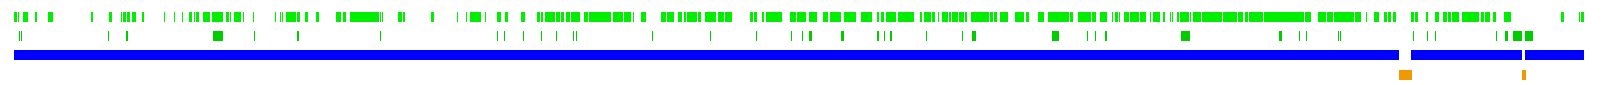

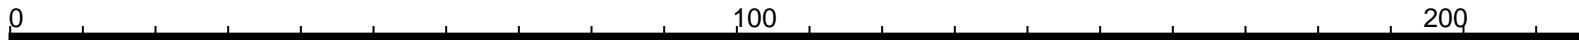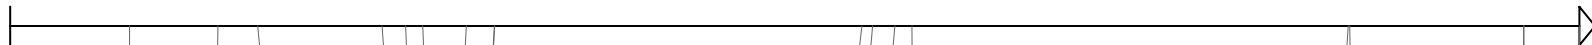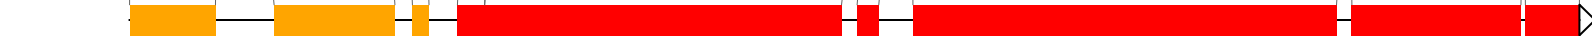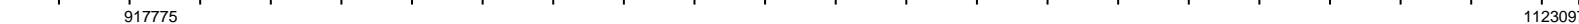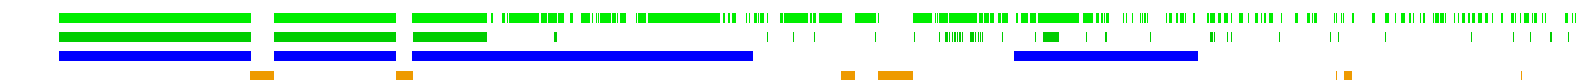

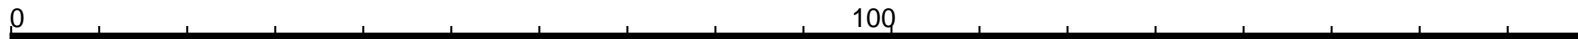

KBases BAC  
Gaps in BAC  
CT990553.6

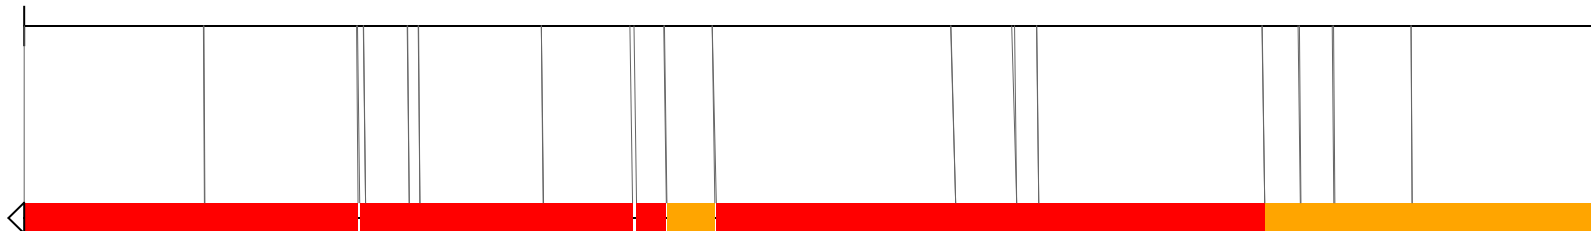

GL397431.1

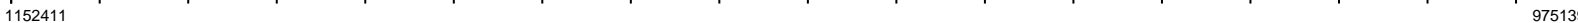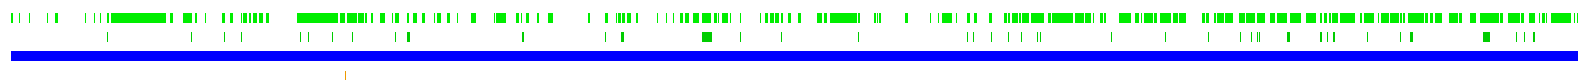

Rpts  
Tandem Rpts  
SDs  
Gaps

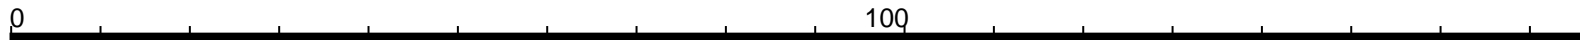

KBases BAC

Gaps in BAC

CT990554.14

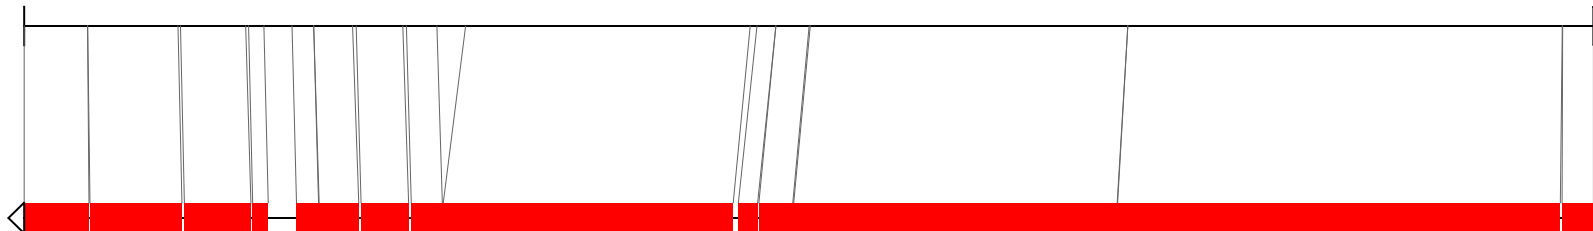

GL397324.1

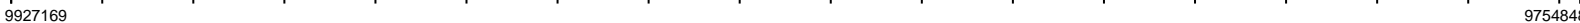

Rpts  
Tandem Rpts  
SDs  
Gaps

**Nleu3**



KBases BAC

Gaps in BAC

AC198148.2

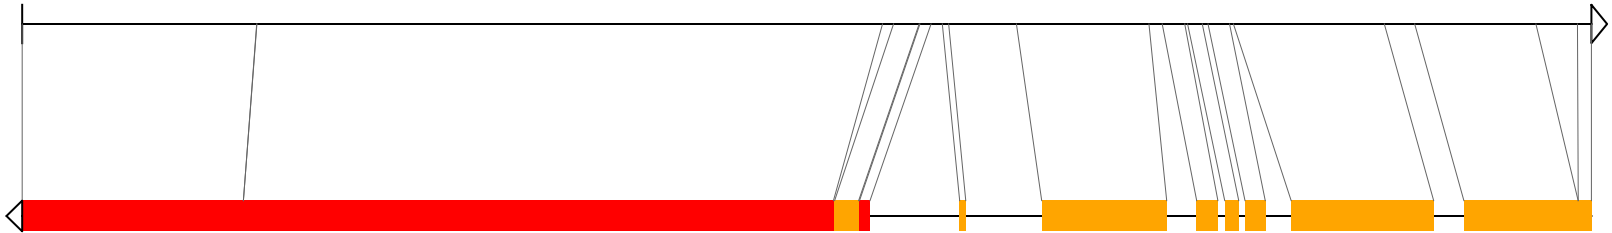

NLE11

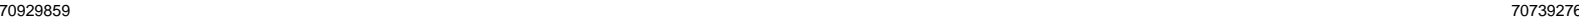

Rpts

Gaps



KBases BAC

Gaps in BAC

AC198148.2

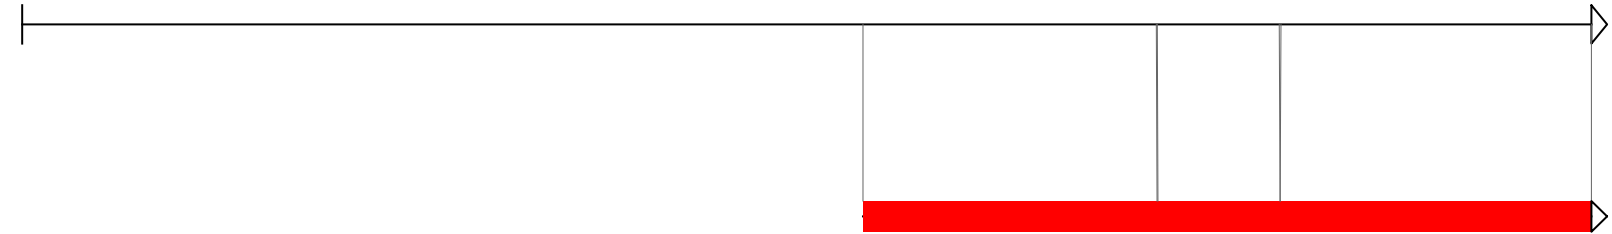

NLE8

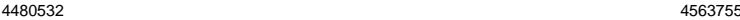

Rpts

Gaps

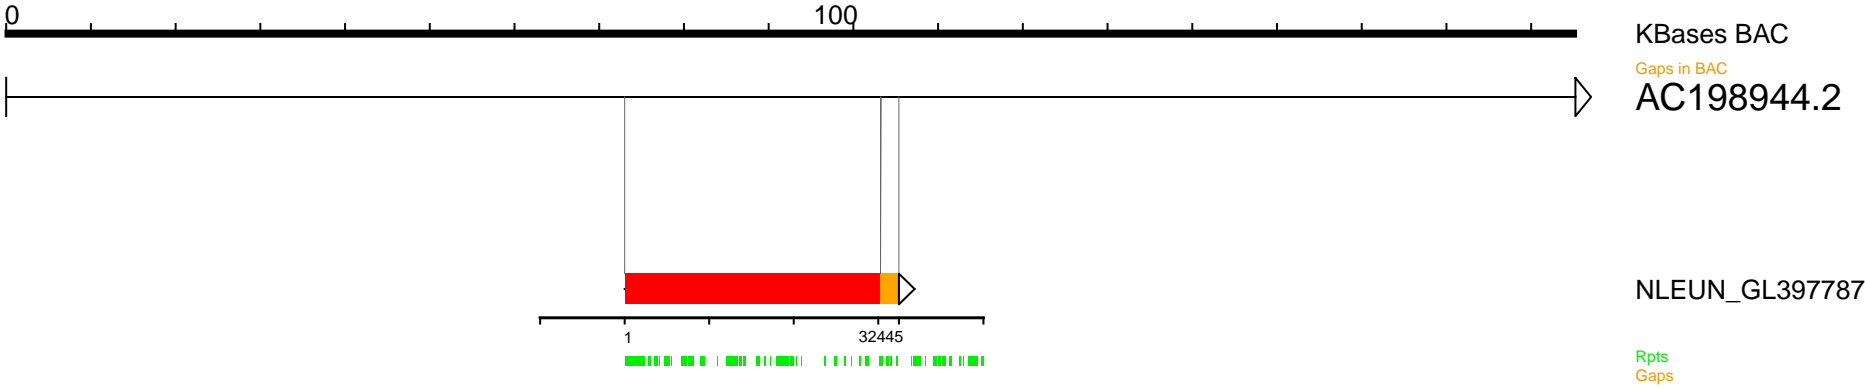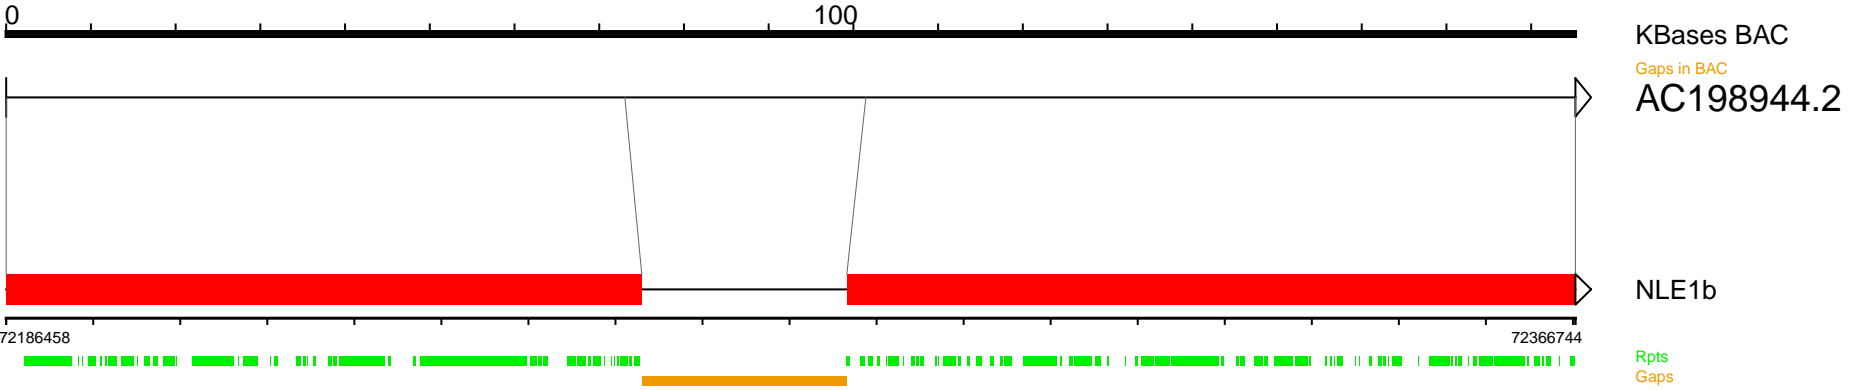

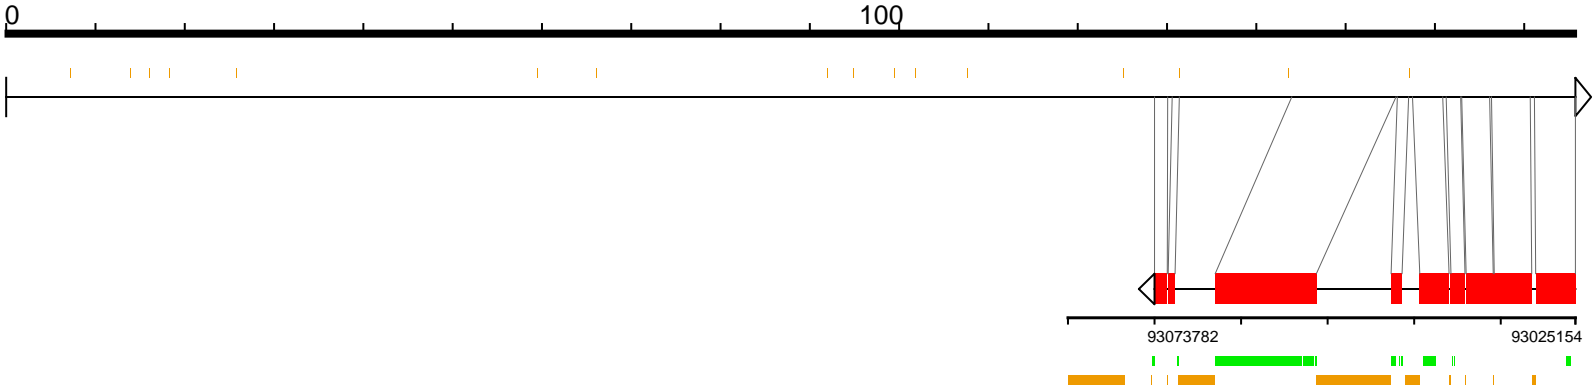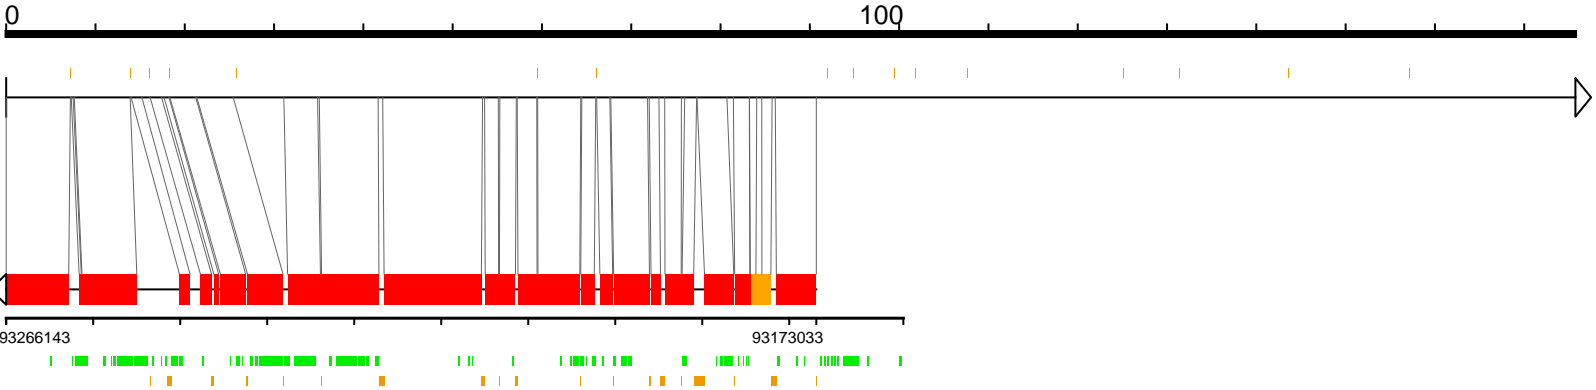

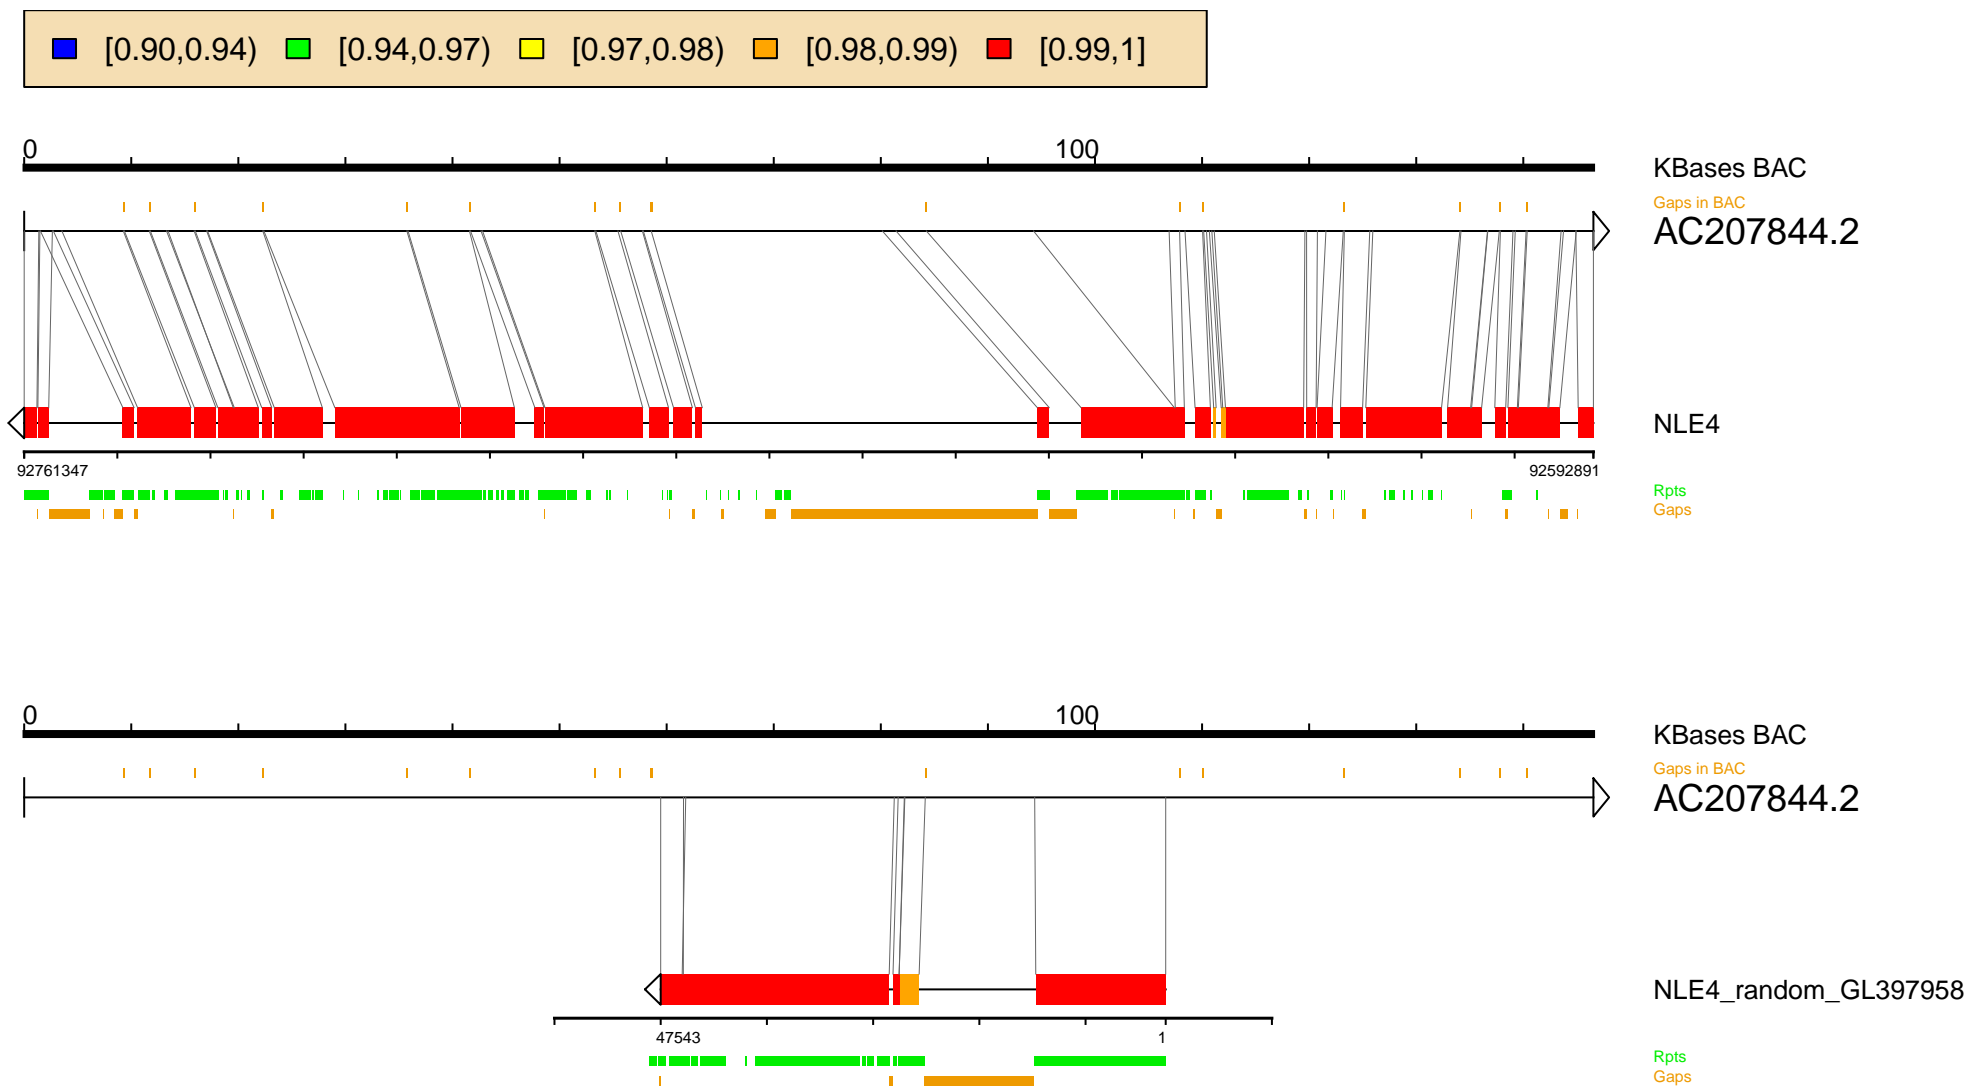

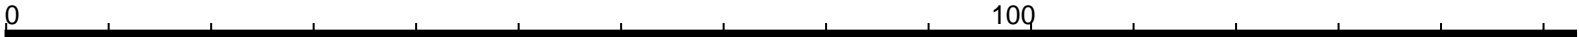

KBases BAC

Gaps in BAC

AC215263.4

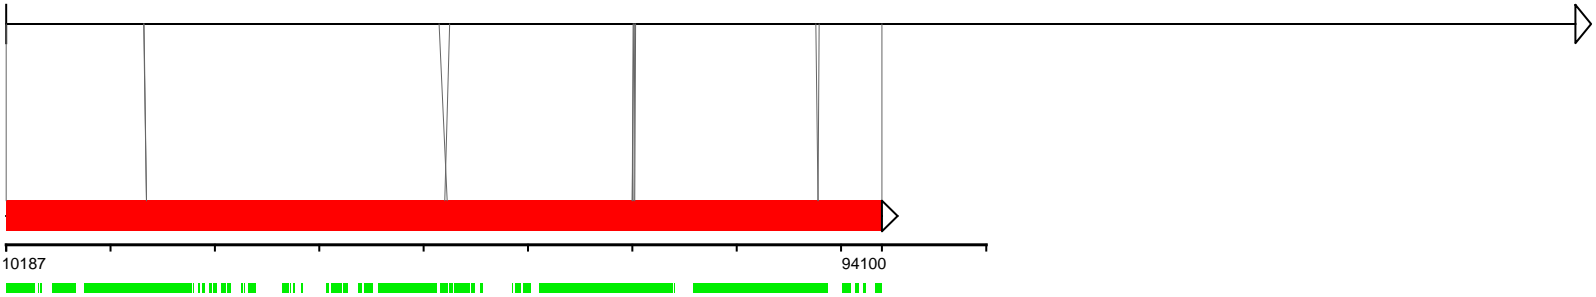

NLE19\_random\_ADFV0113479

Rpts

Gaps

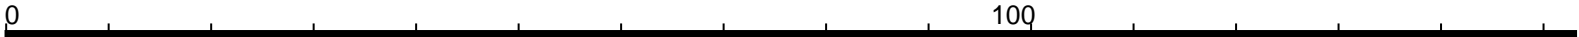

KBases BAC

Gaps in BAC

AC215263.4

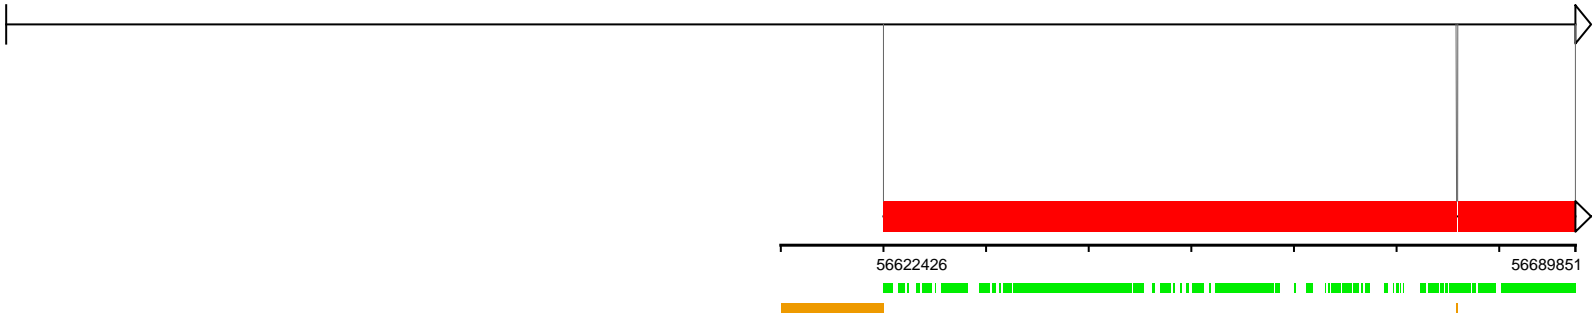

NLE19

Rpts

Gaps

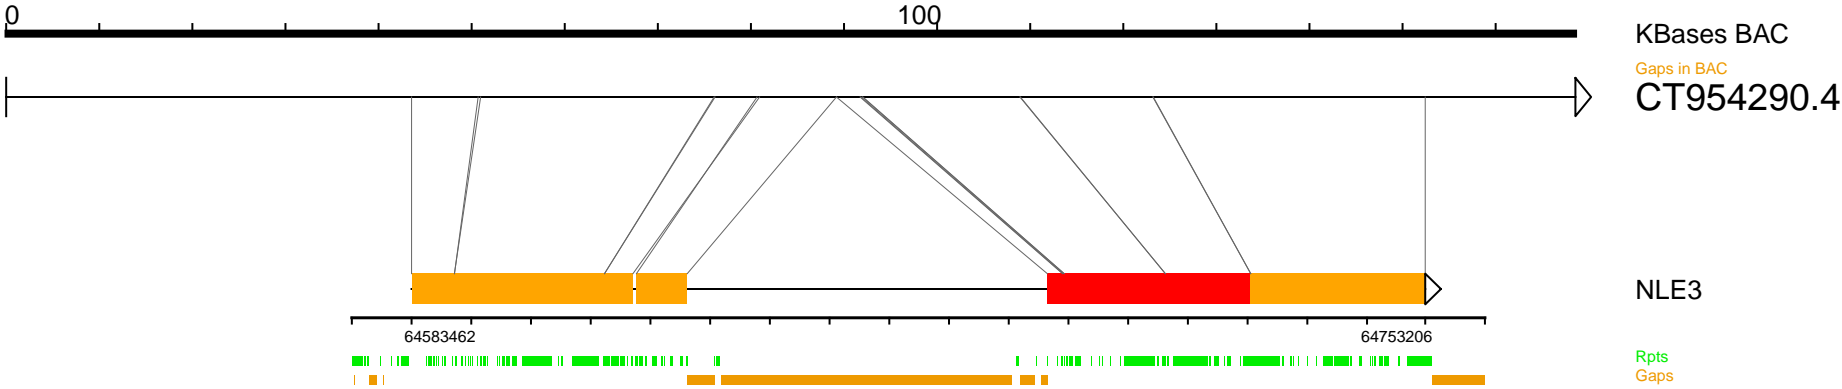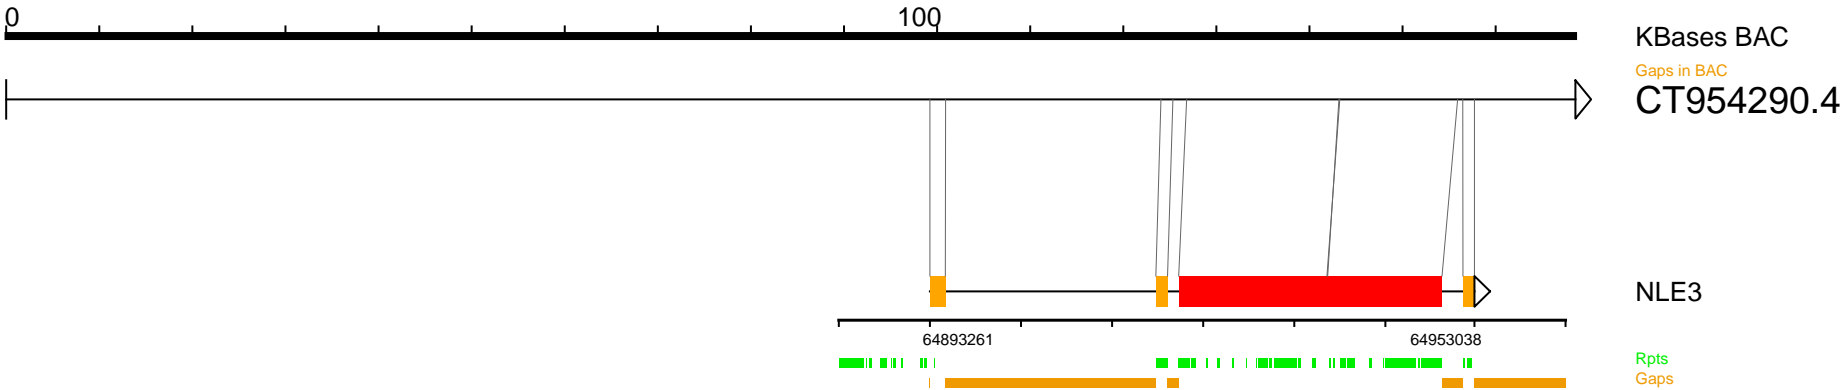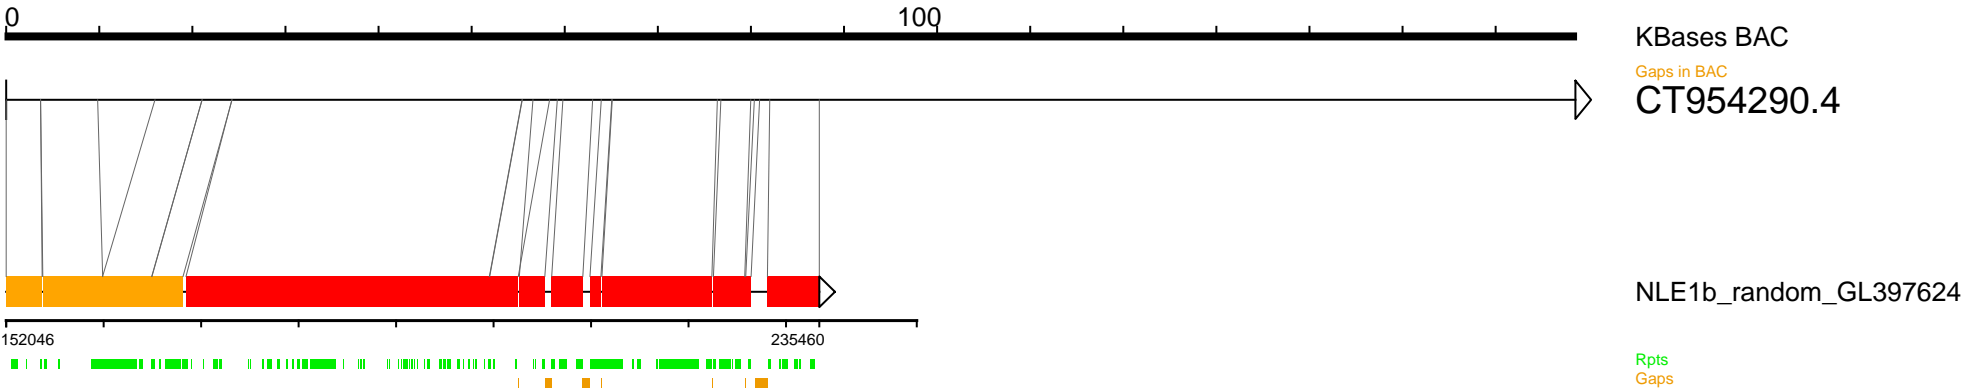

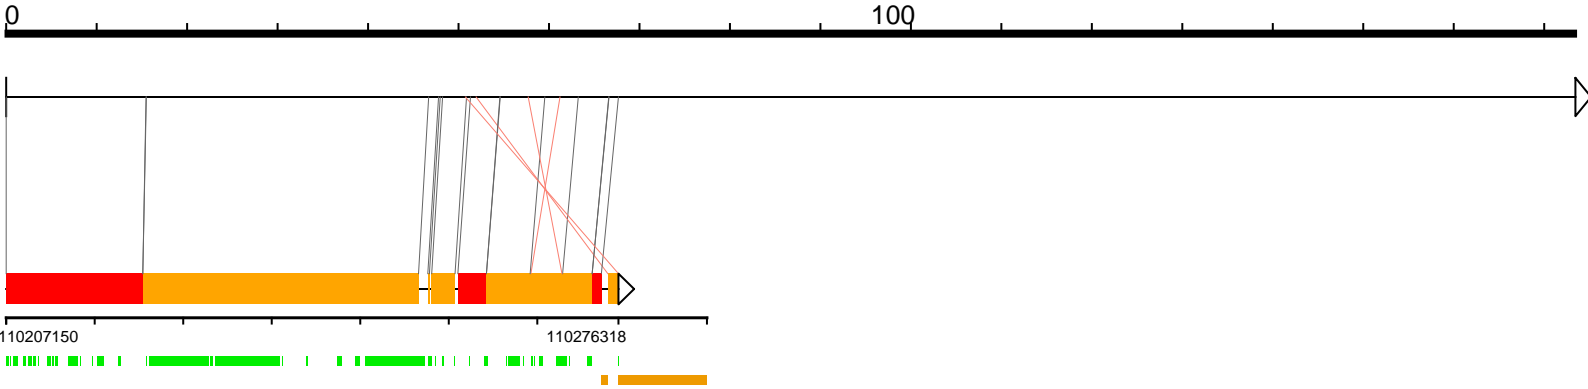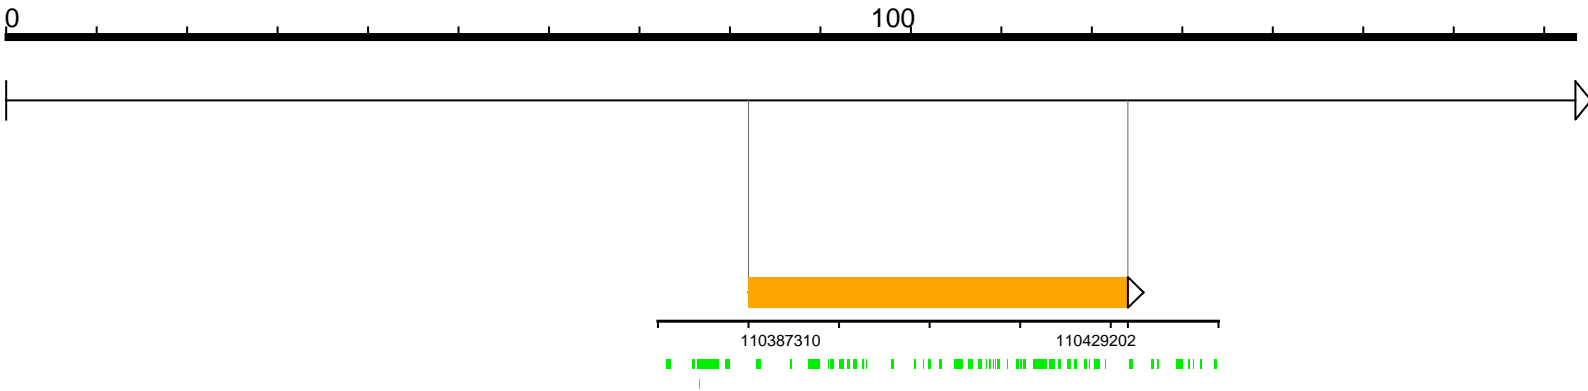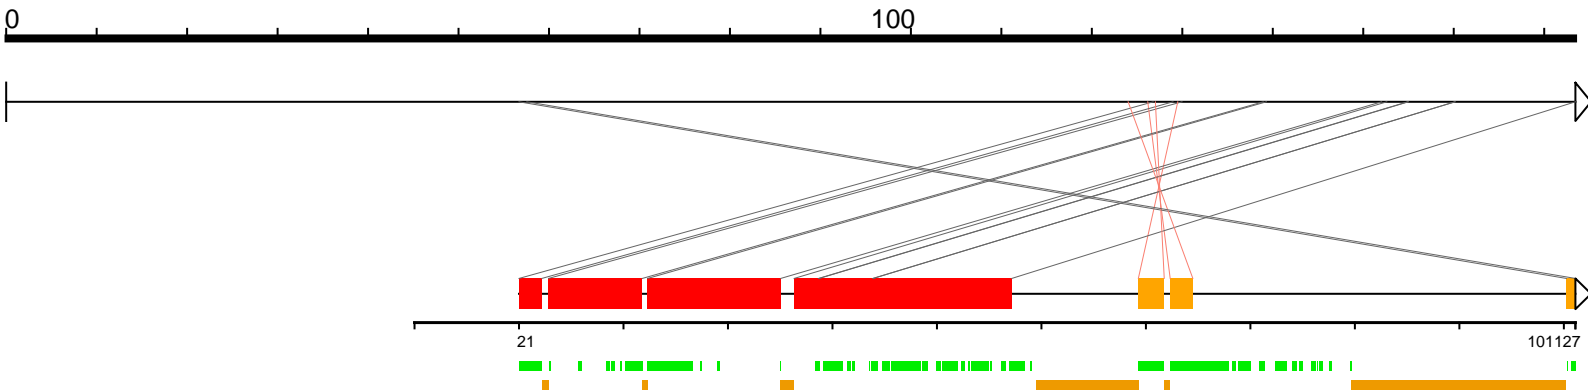

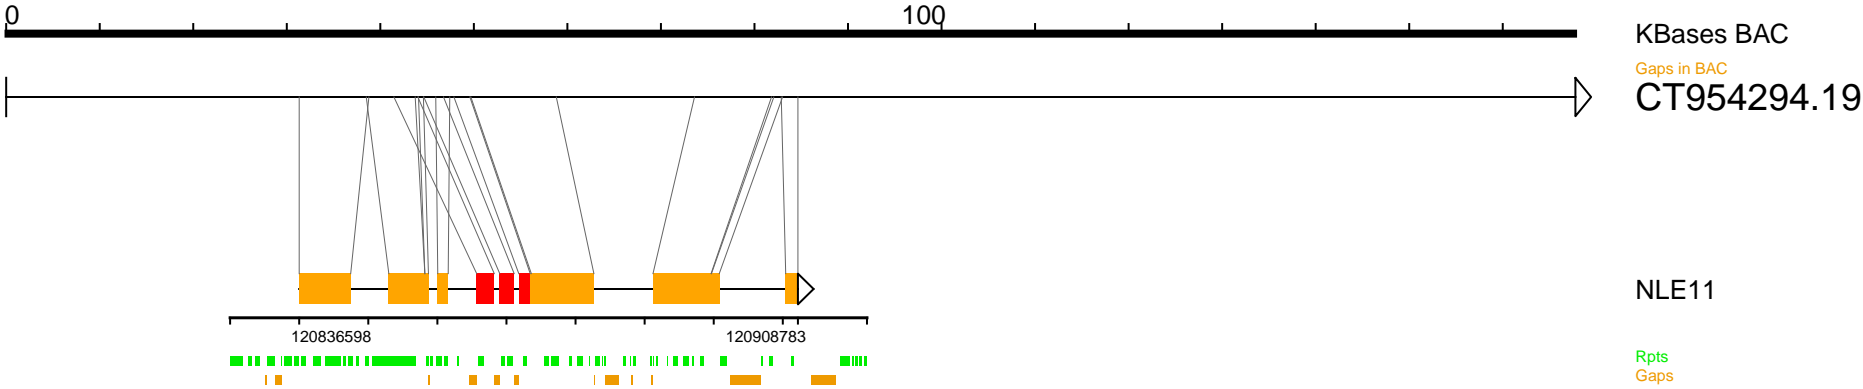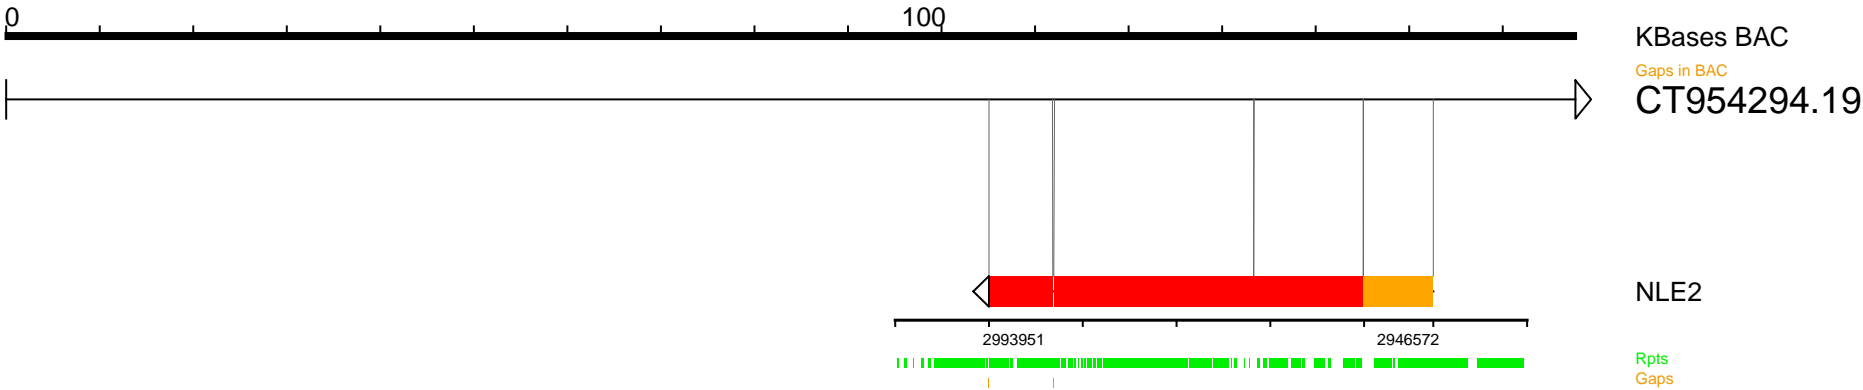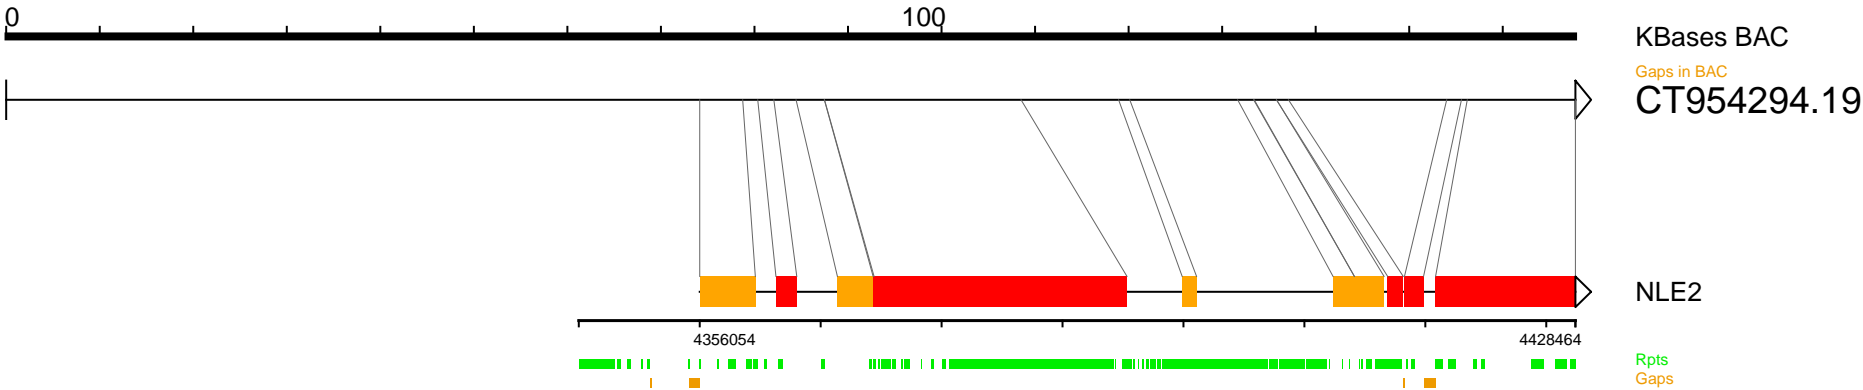

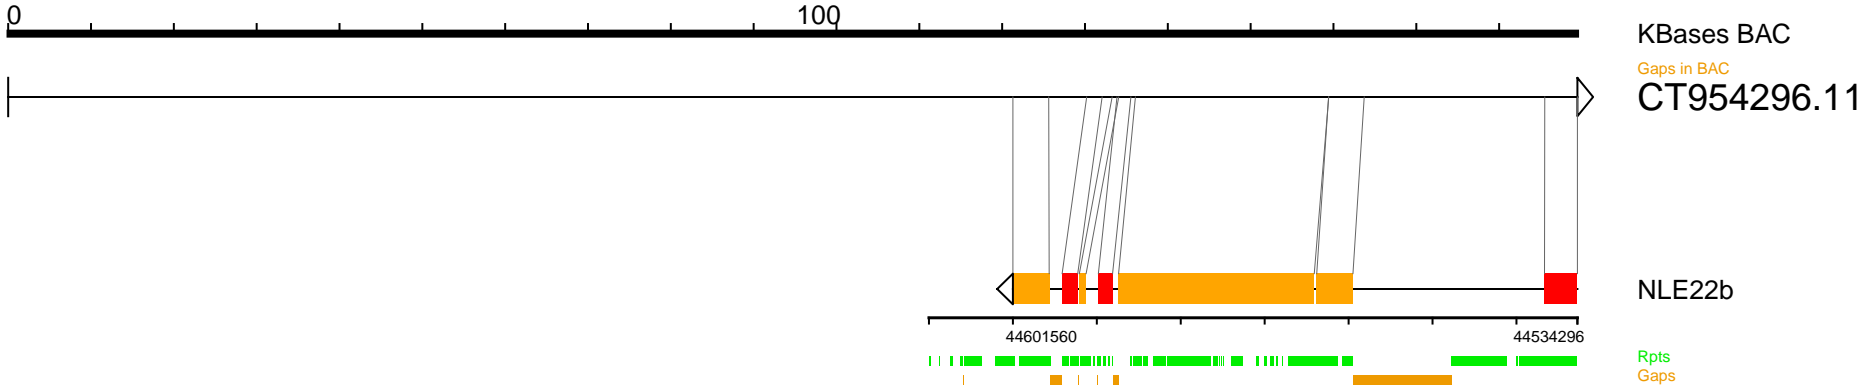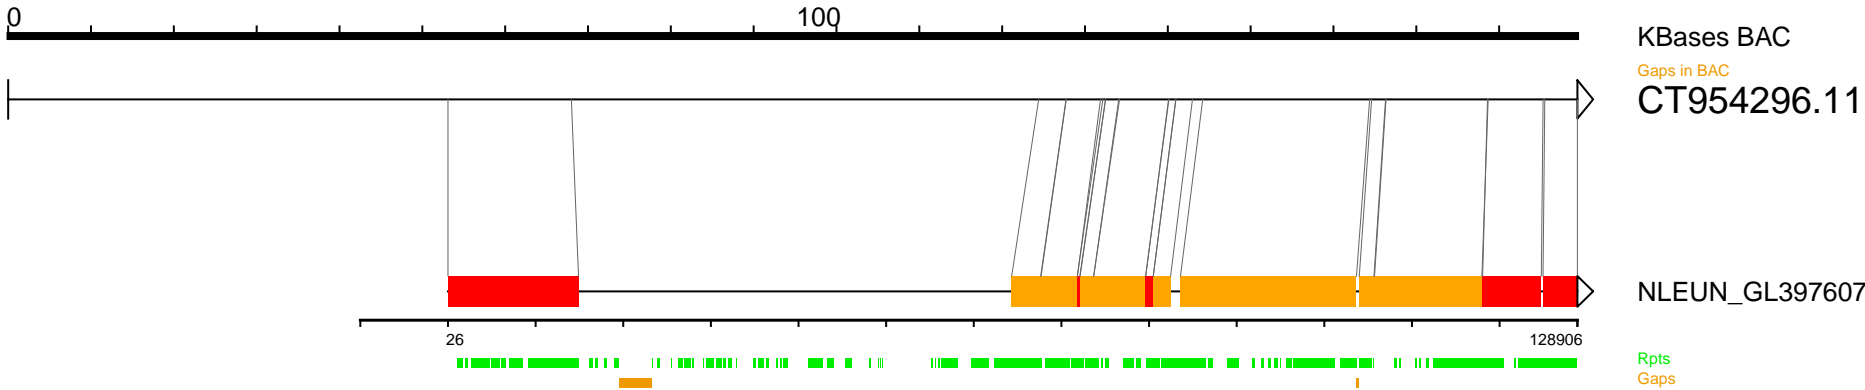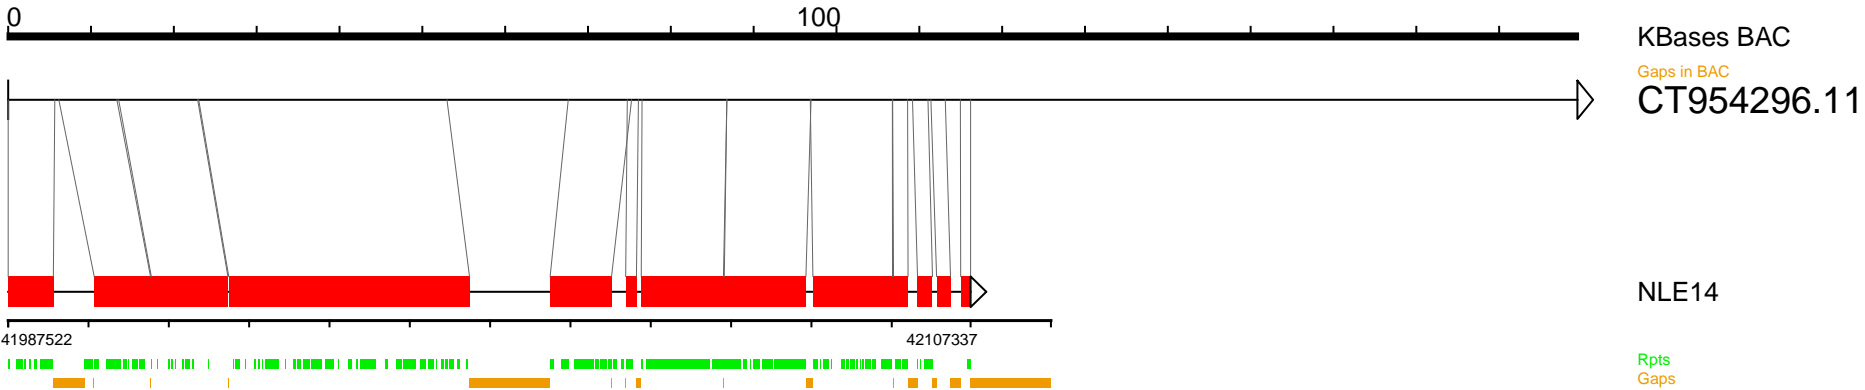



KBases BAC  
Gaps in BAC  
CT954297.11

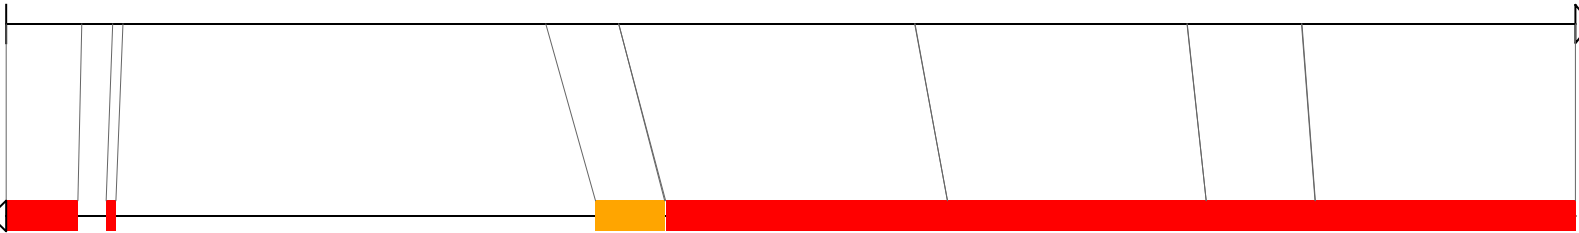

NLEUN\_GL397431a

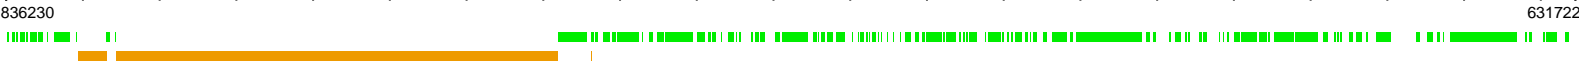

KBases BAC  
Gaps in BAC  
CT954297.11

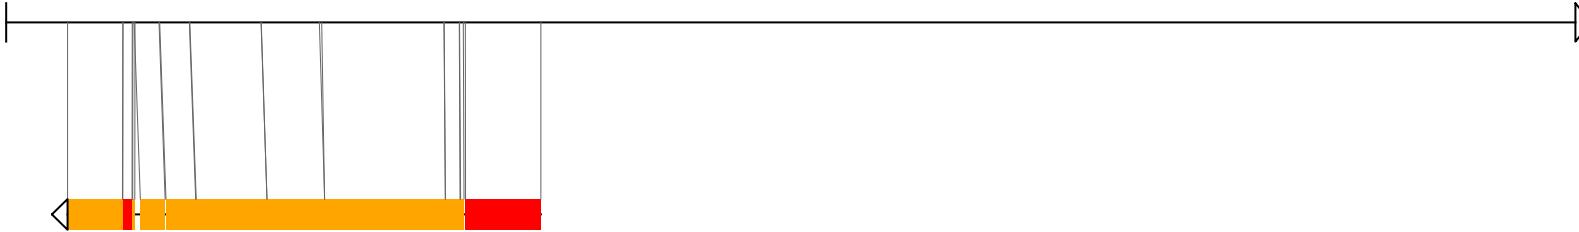

NLEUN\_GL397431a

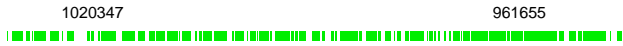



KBases BAC

Gaps in BAC

CT954298.5

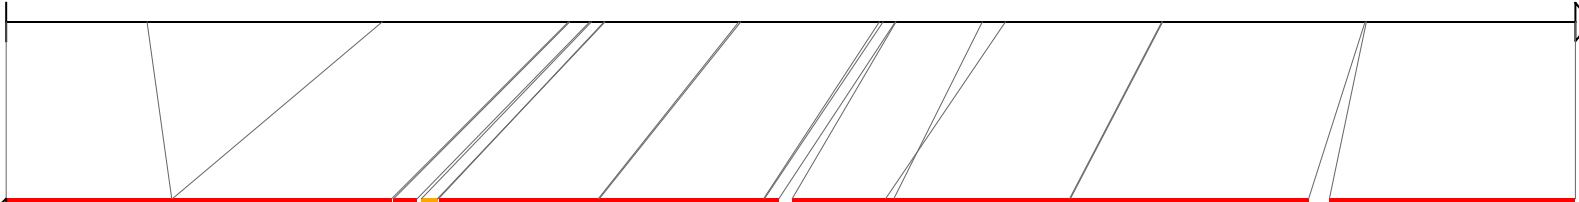

NLE11

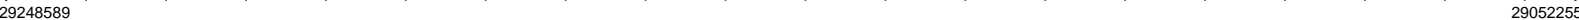

Rpts

Gaps



KBases BAC

Gaps in BAC

CT954298.5

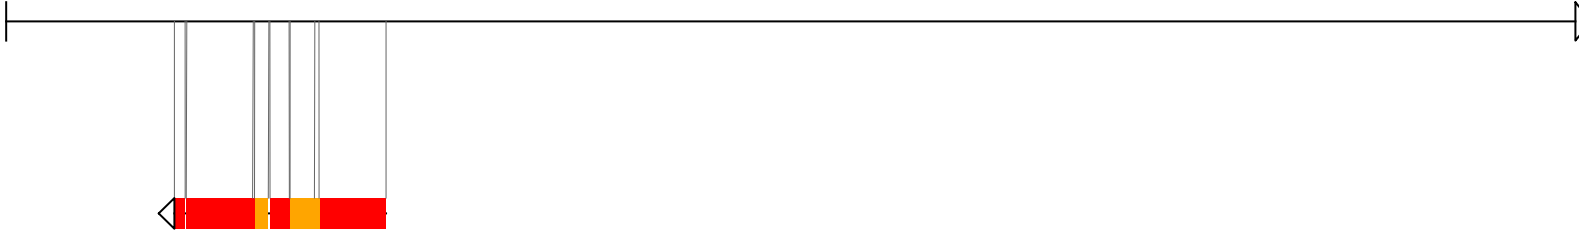

NLE11\_random\_GL398044

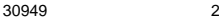

Rpts

Gaps

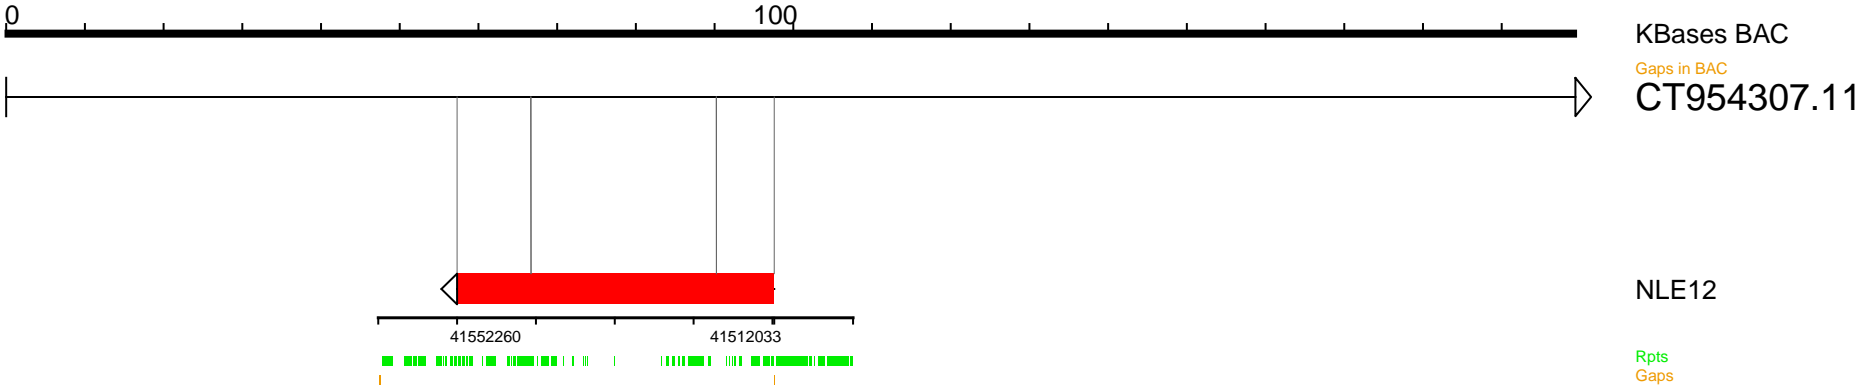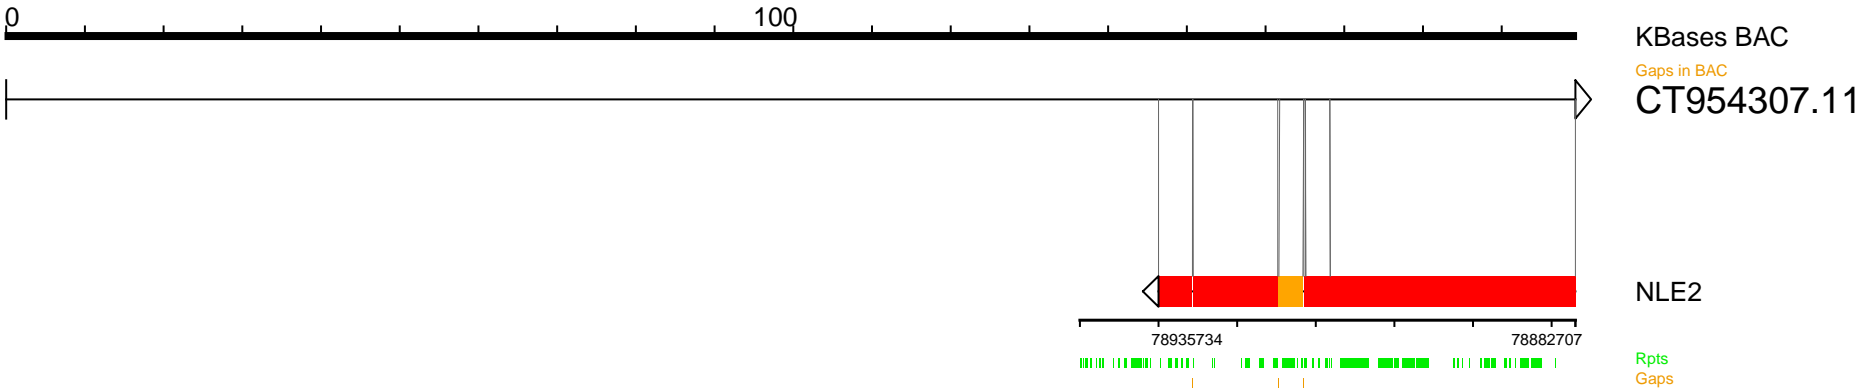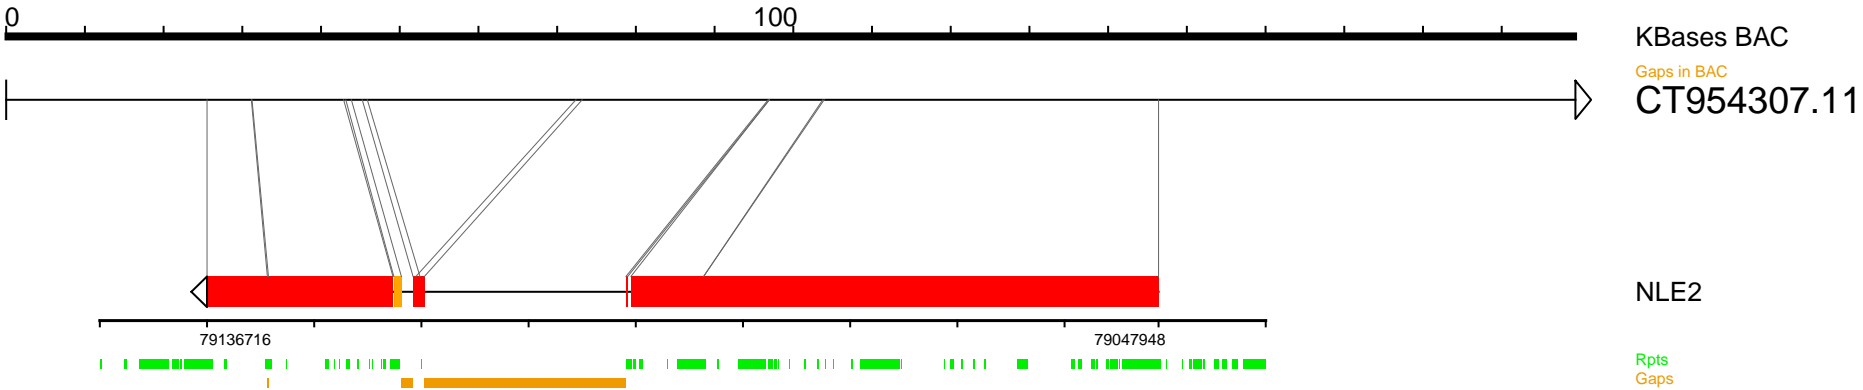

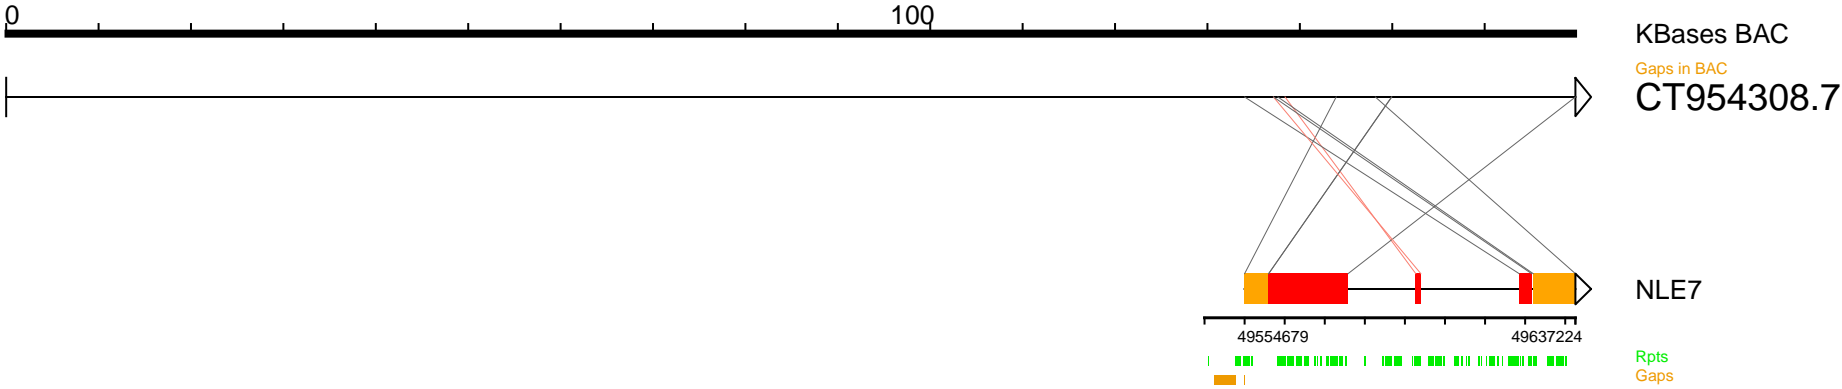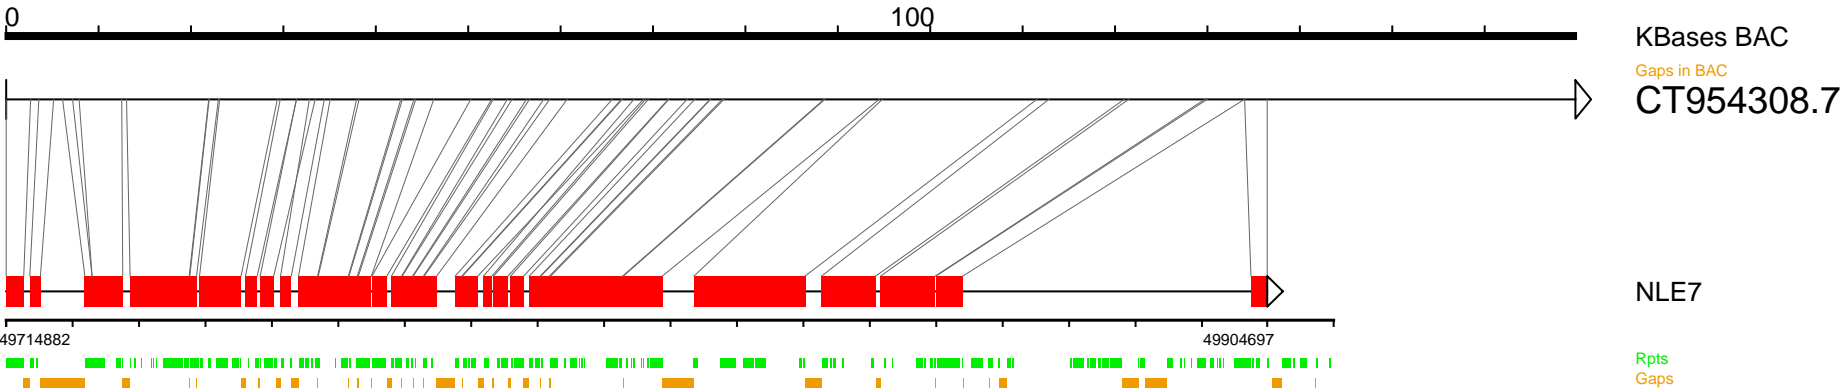

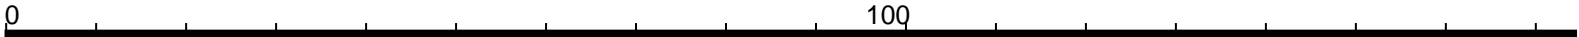

KBases BAC

Gaps in BAC

CT954309.16

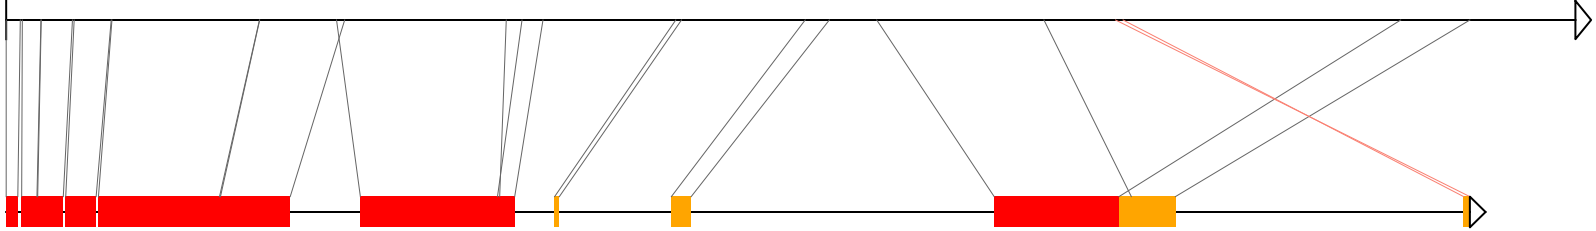

NLE17

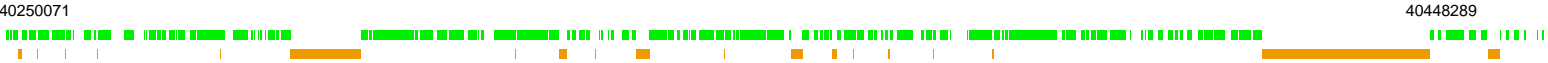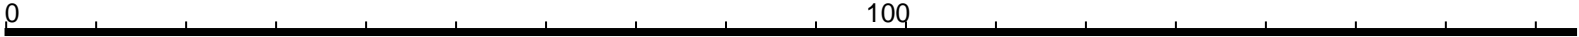

KBases BAC

Gaps in BAC

CT954309.16

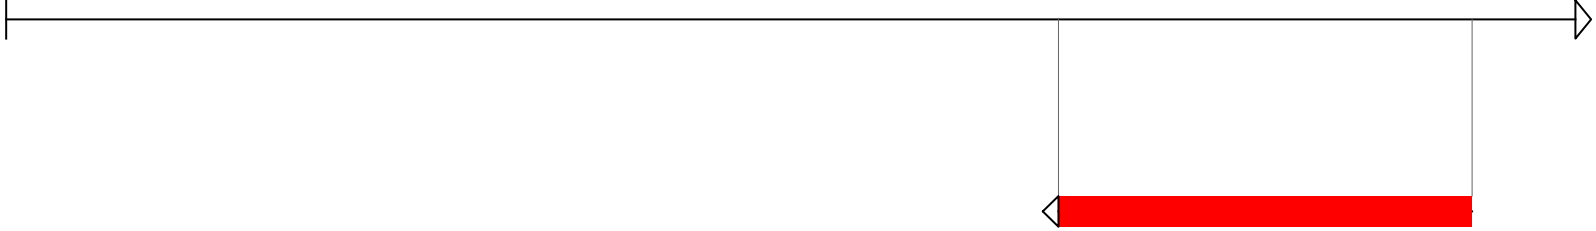

NLE17

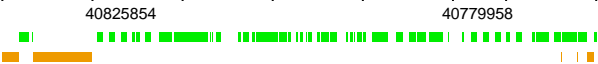

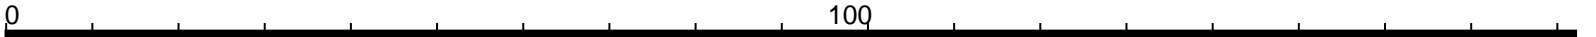

KBases BAC  
Gaps in BAC  
CT954312.5

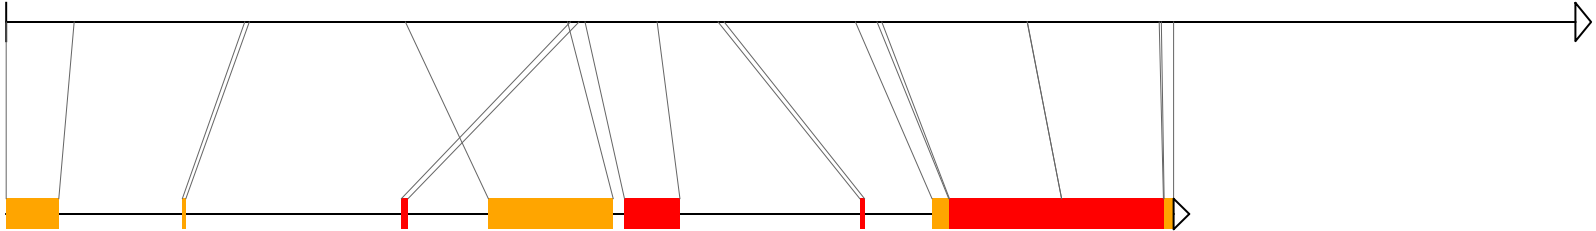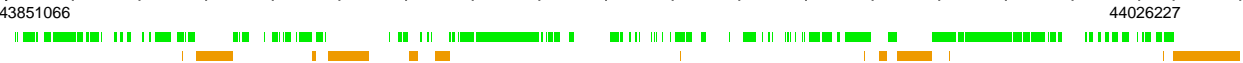

NLE22b

Rpts  
Gaps

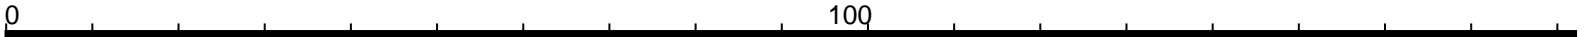

KBases BAC  
Gaps in BAC  
CT954312.5

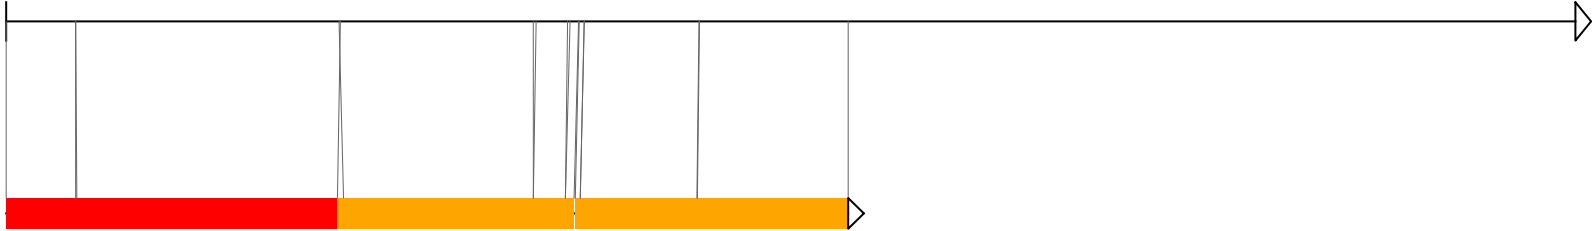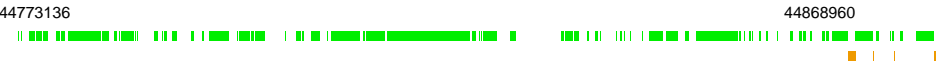

NLE22b

Rpts  
Gaps

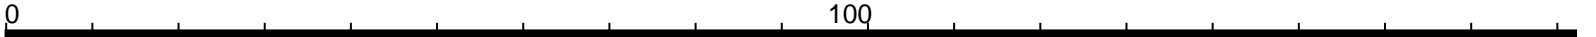

KBases BAC  
Gaps in BAC  
CT954312.5

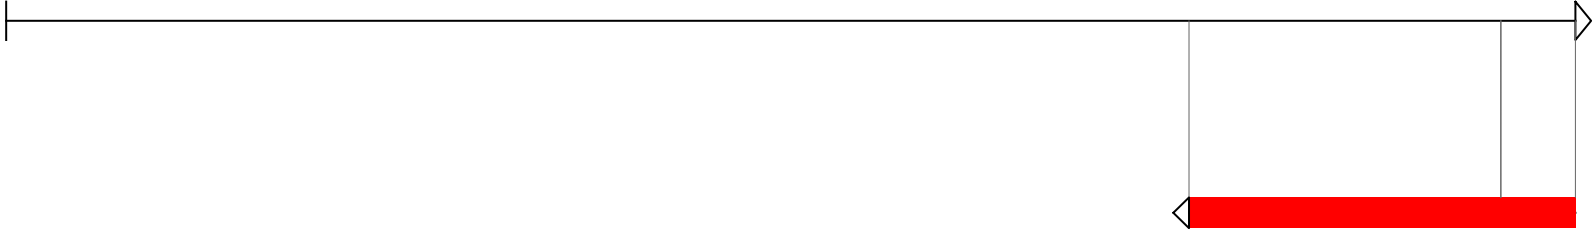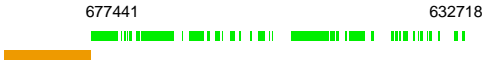

NLEUN\_GL397566

Rpts  
Gaps



KBases BAC  
CT954313.6

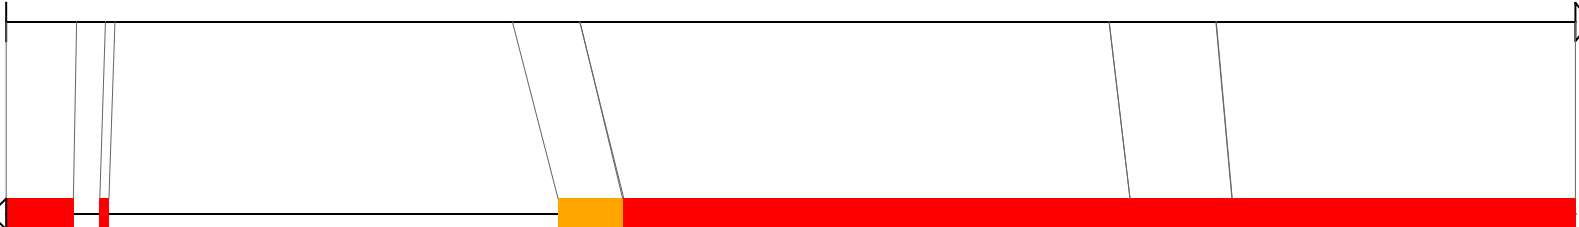

NLEUN\_GL397431a

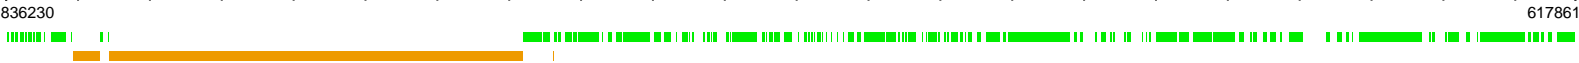

KBases BAC  
CT954313.6

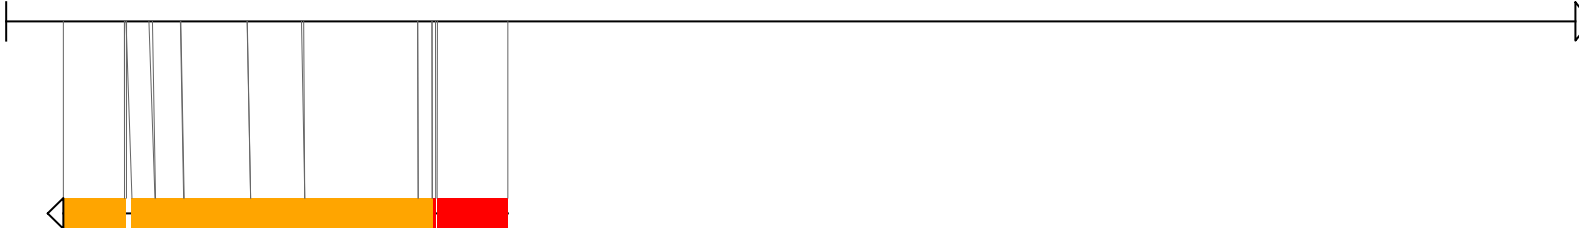

NLEUN\_GL397431a

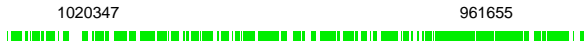

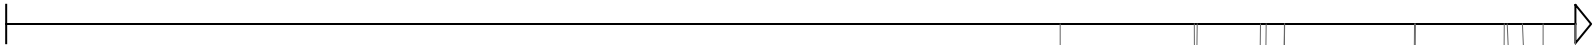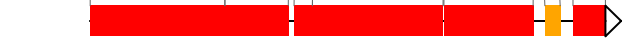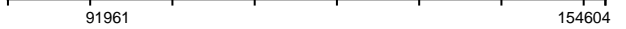

KBases BAC

Gaps in BAC

CT954318.8

NLEUN\_GL397501

Rpts

Gaps

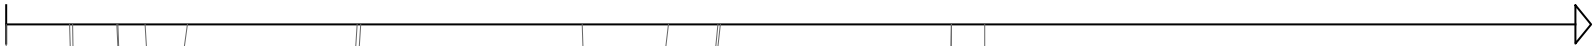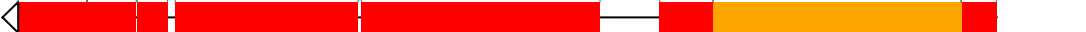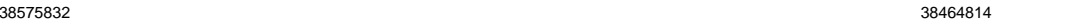

KBases BAC

Gaps in BAC

CT954318.8

NLE20

Rpts

Gaps

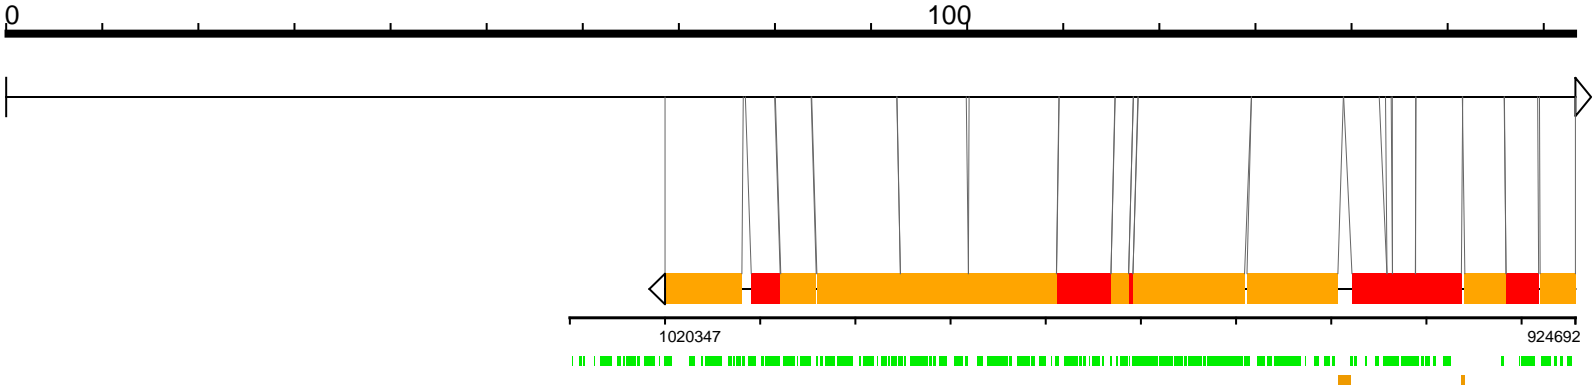

KBases BAC  
Gaps in BAC  
CT954320.5  
NLEUN\_GL397431a

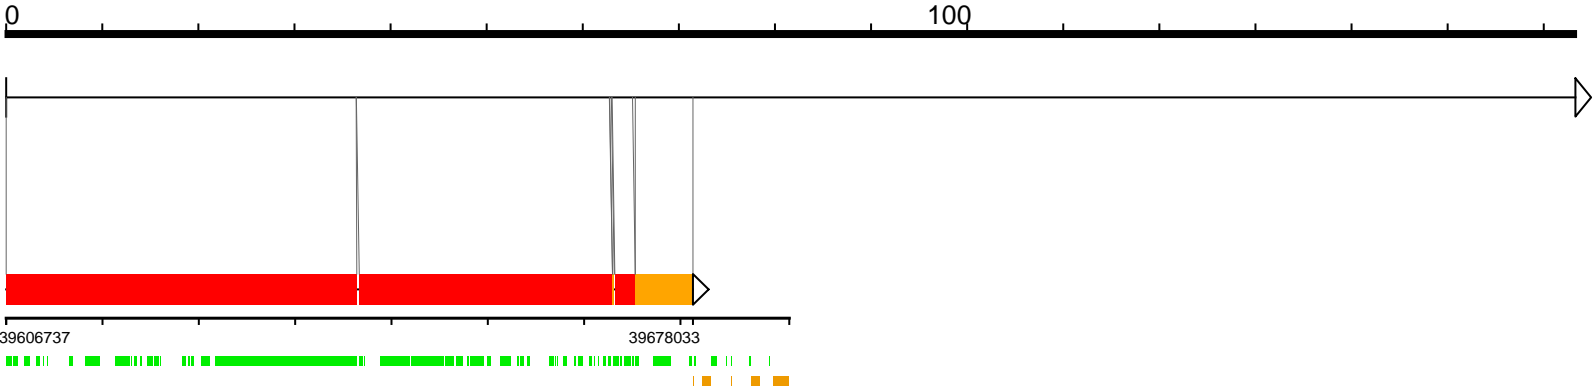

KBases BAC  
Gaps in BAC  
CT954320.5  
NLE7

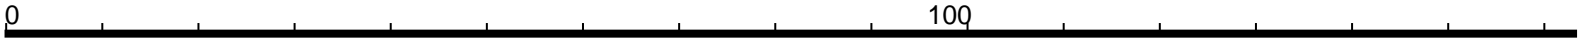

KBases BAC

Gaps in BAC

CT990551.3

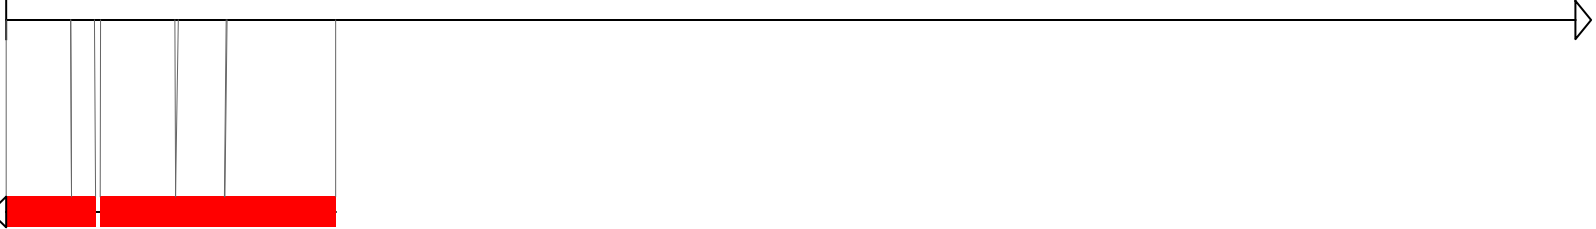

NLEUN\_GL397501

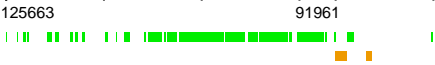

Rpts

Gaps

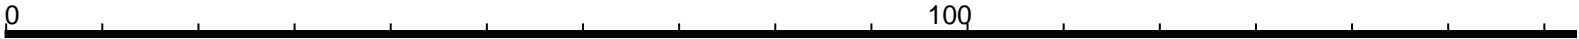

KBases BAC

Gaps in BAC

CT990551.3

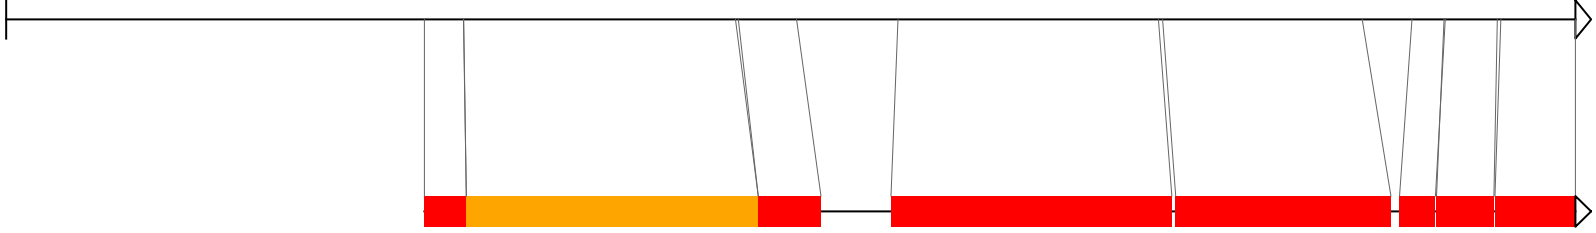

NLE20

38464814

38575832

Rpts

Gaps

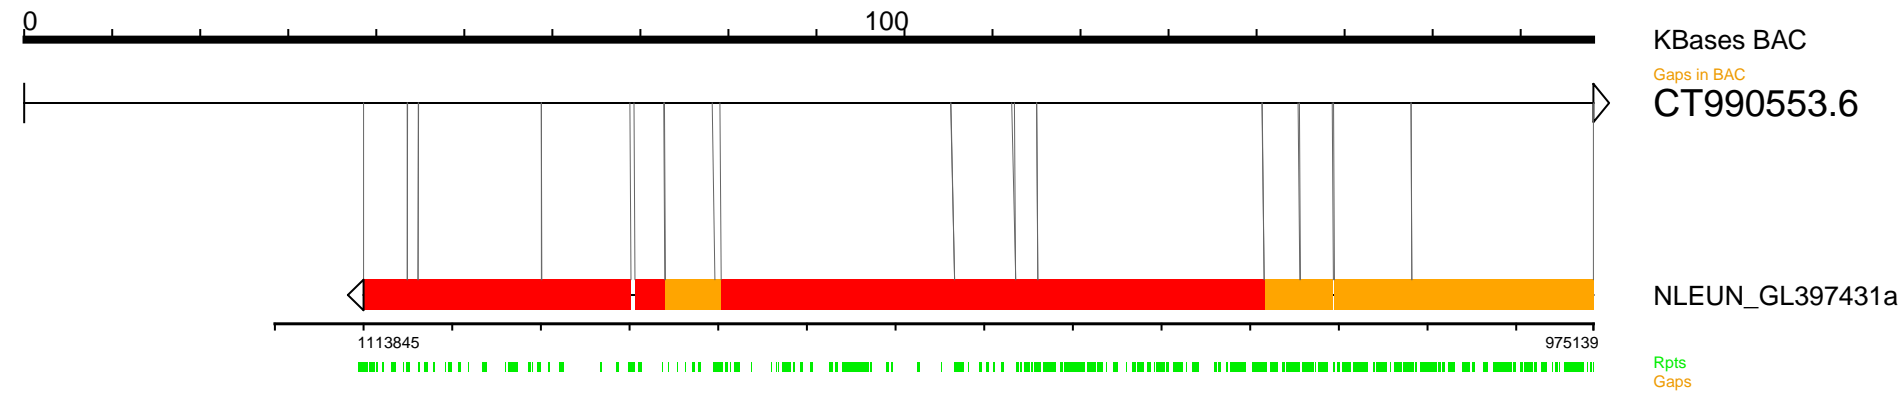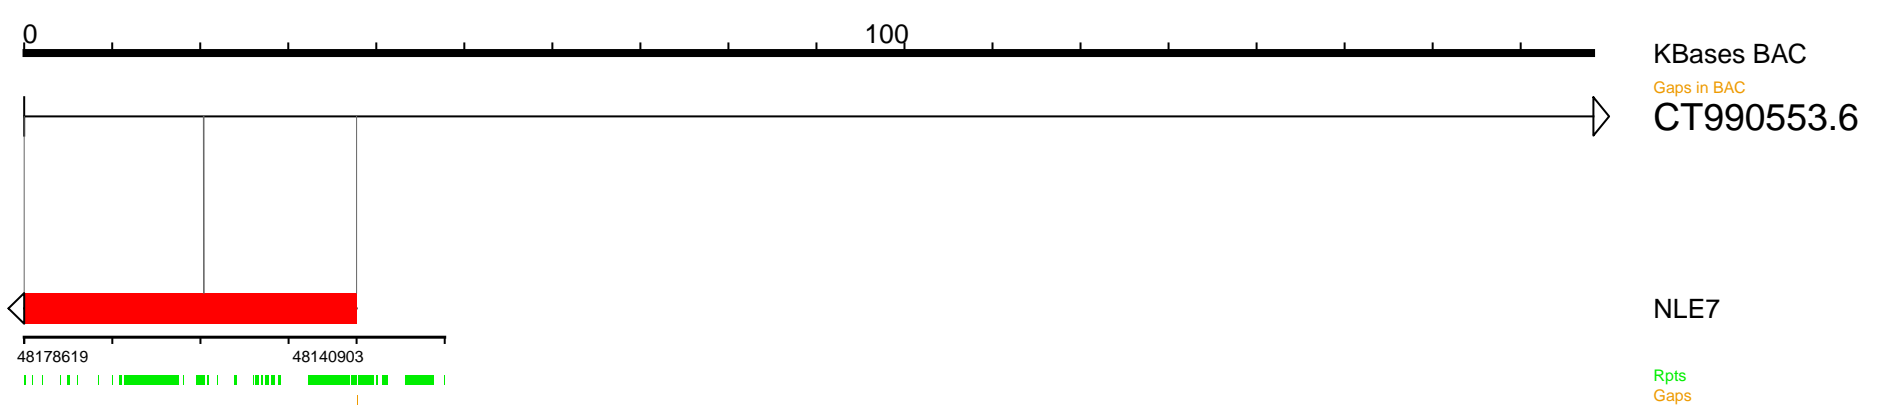

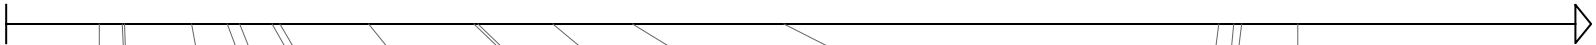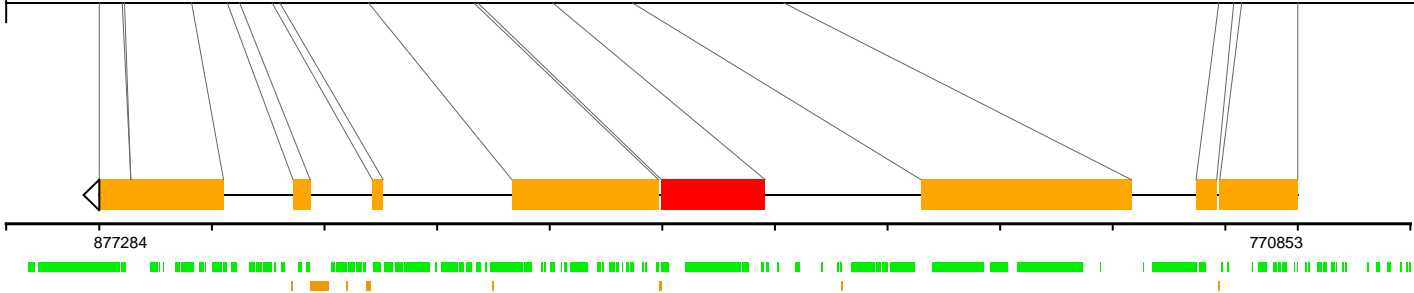

NLEUN\_GL397501

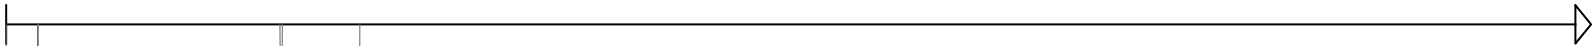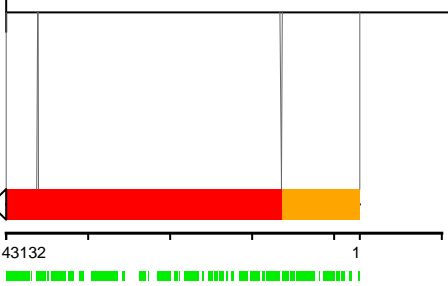

NLEUN\_GL397348a

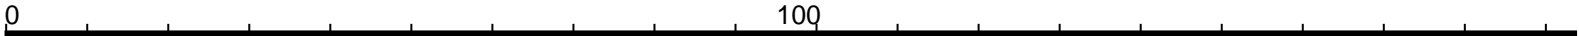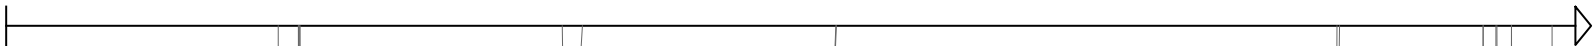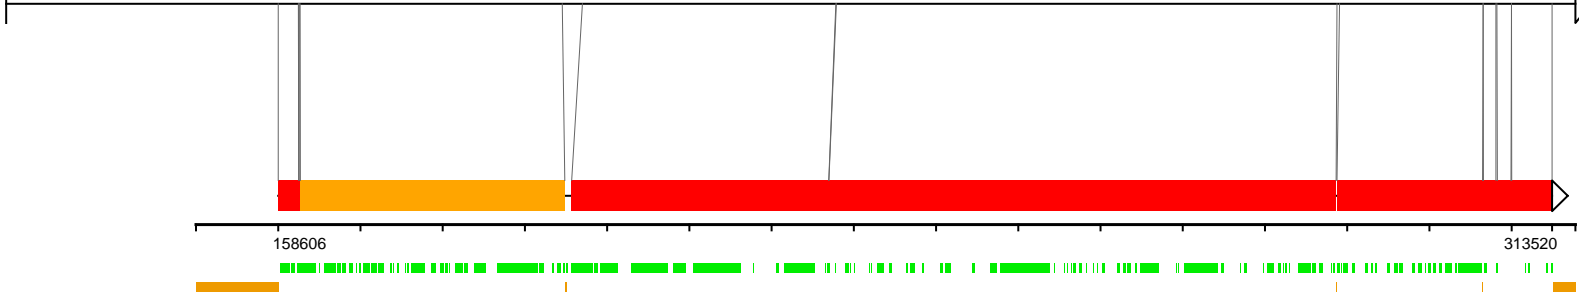

NLEUN\_GL397566

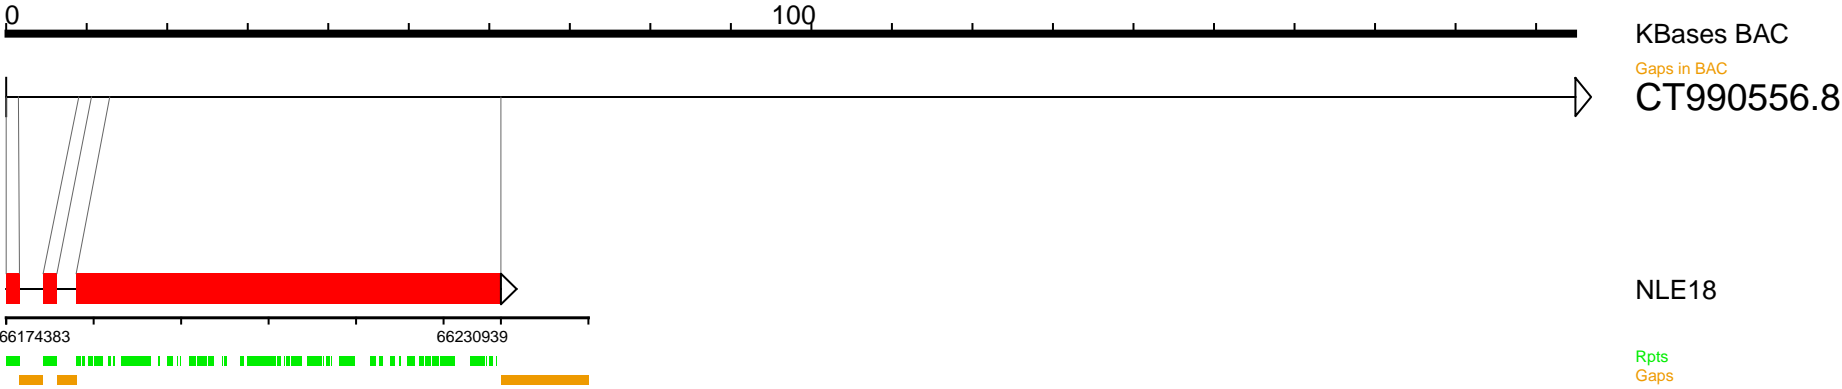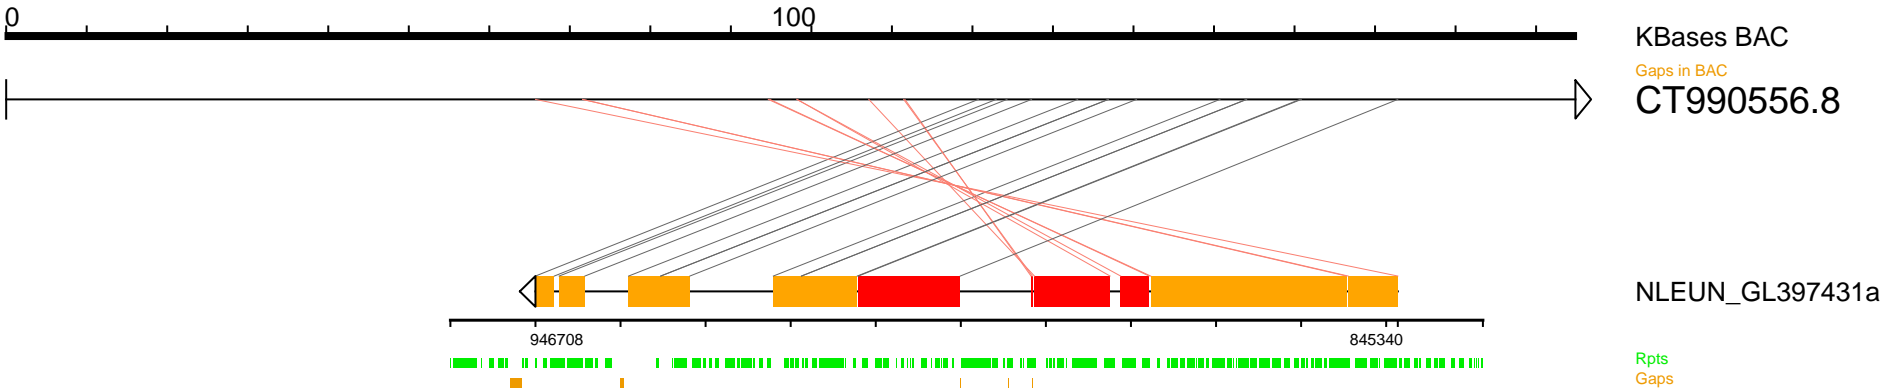

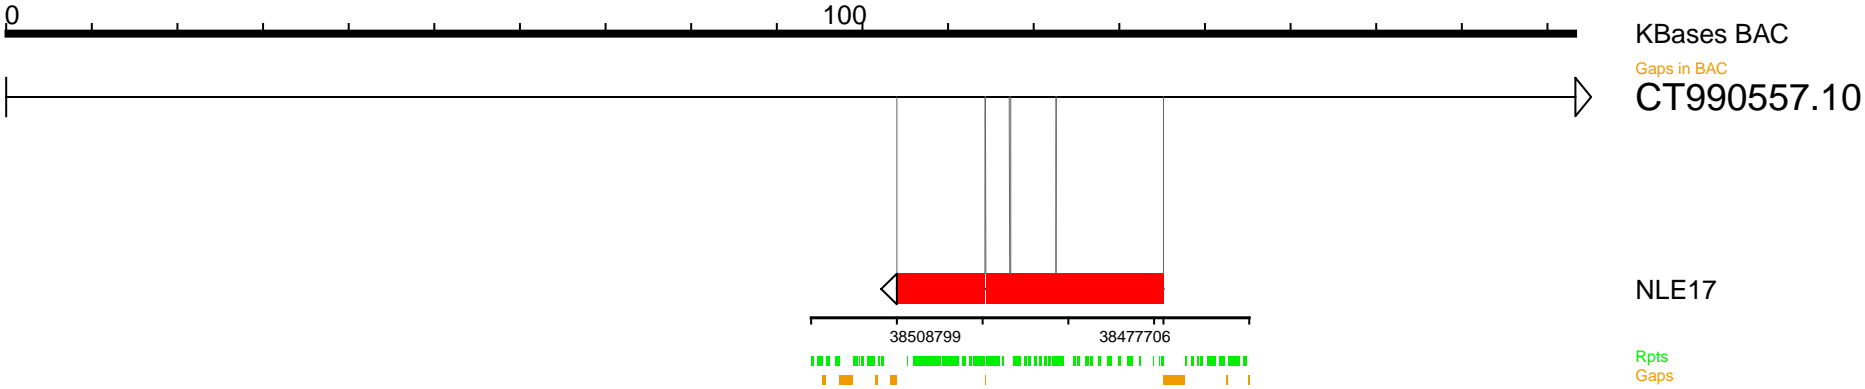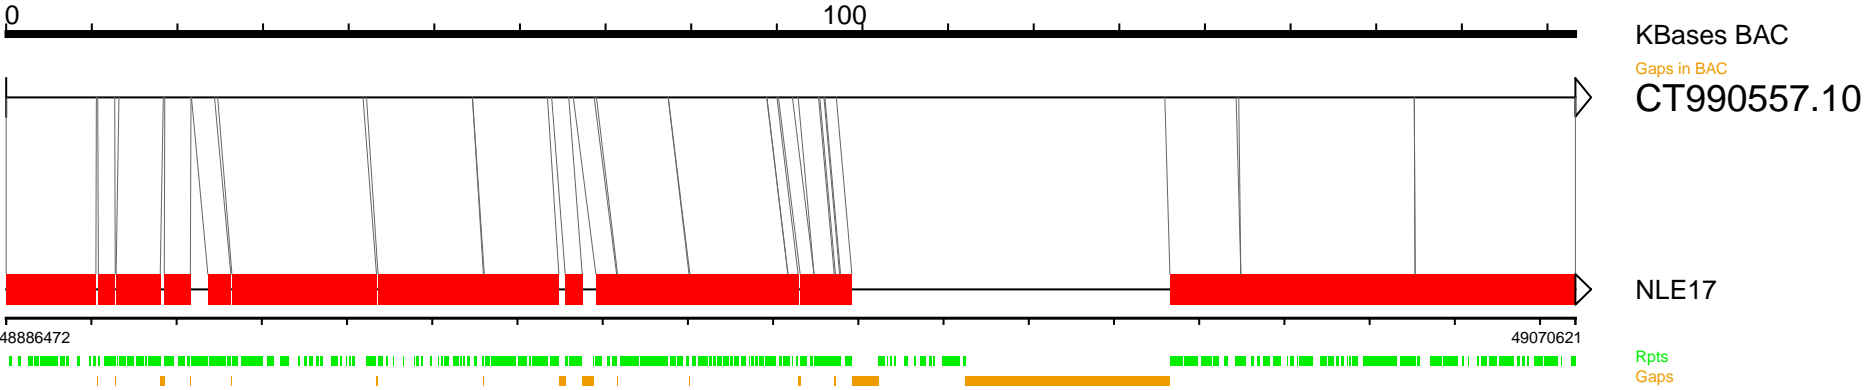

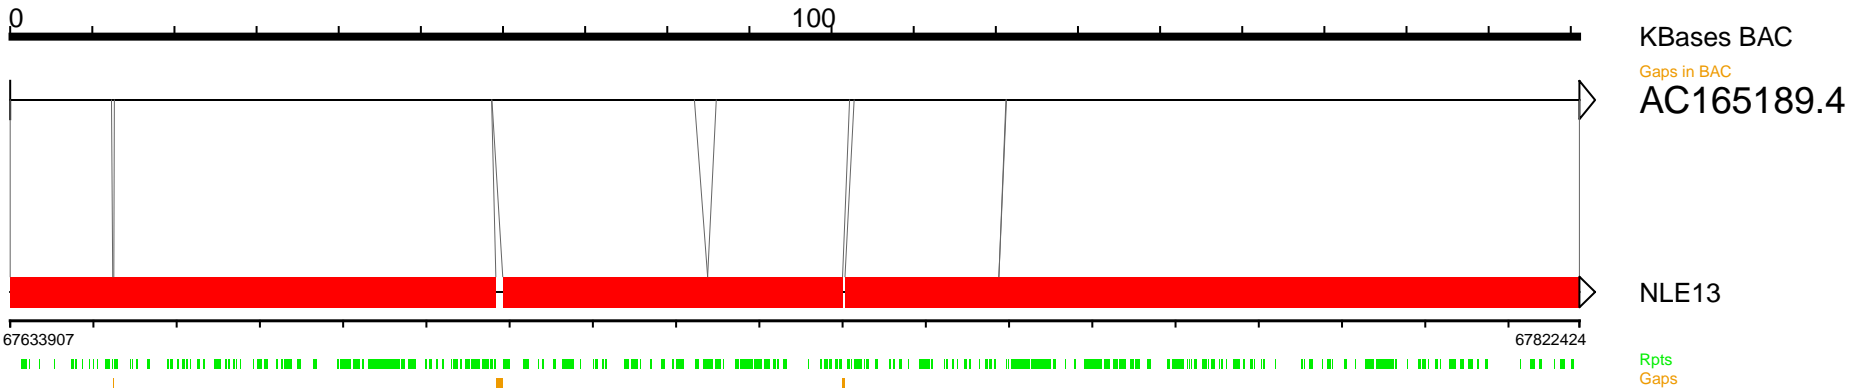

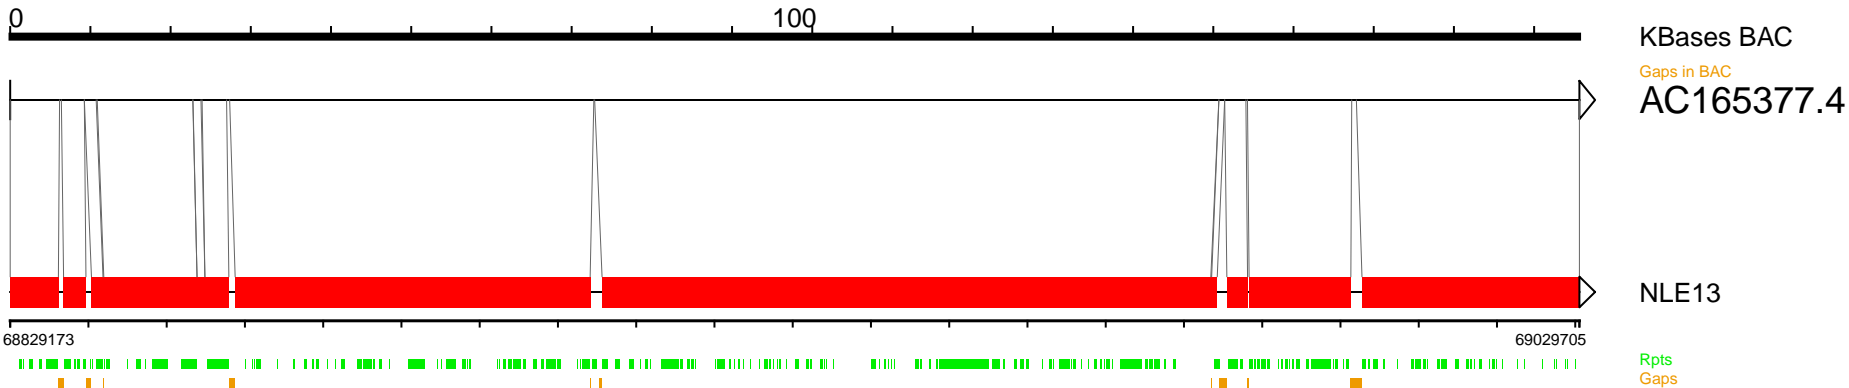

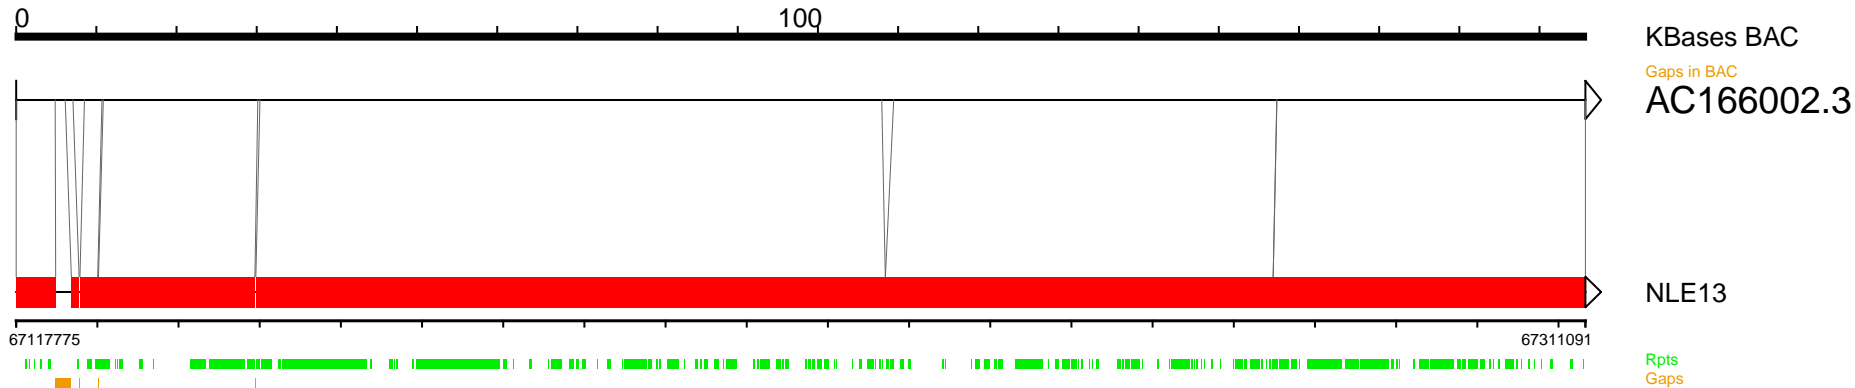

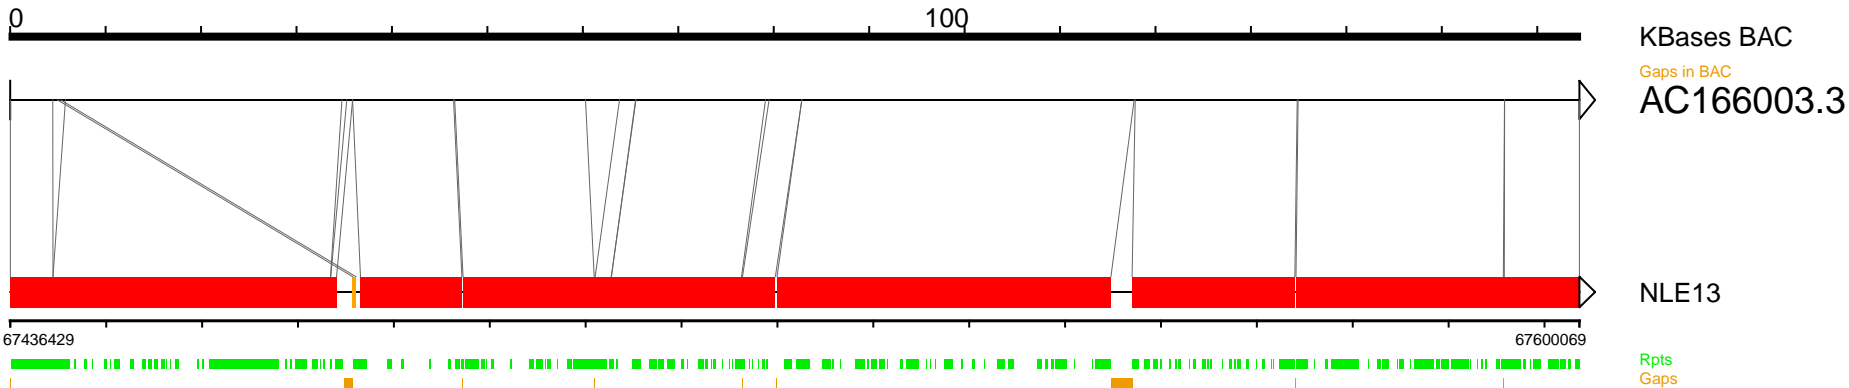

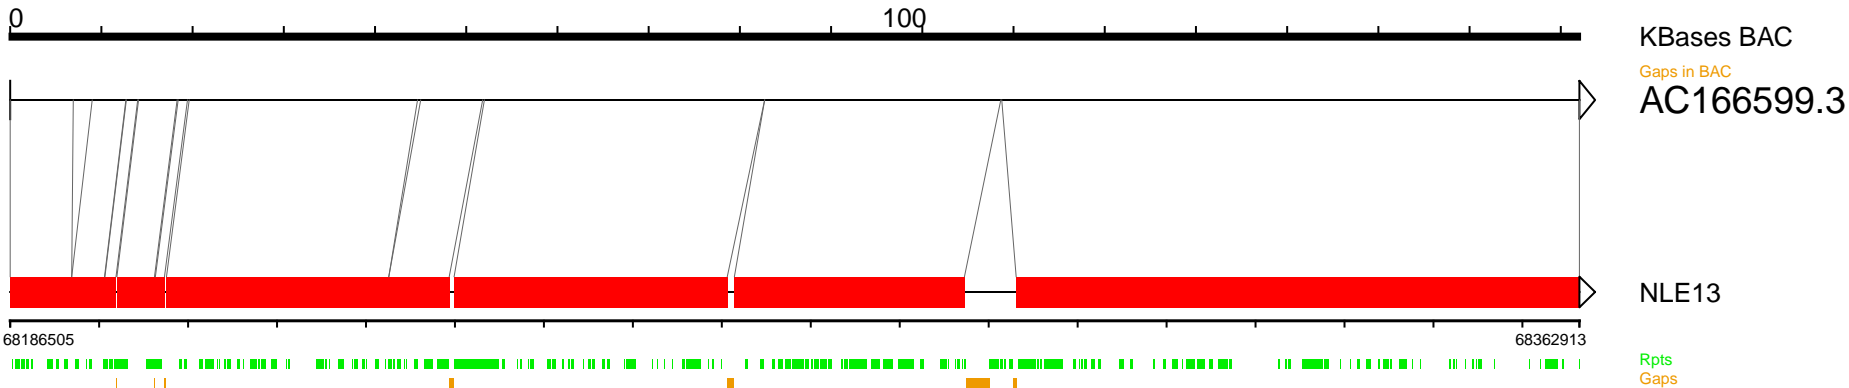

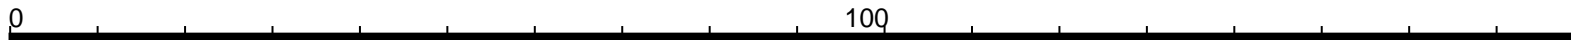

Kbases BAC

Gaps in BAC

AC166600.4

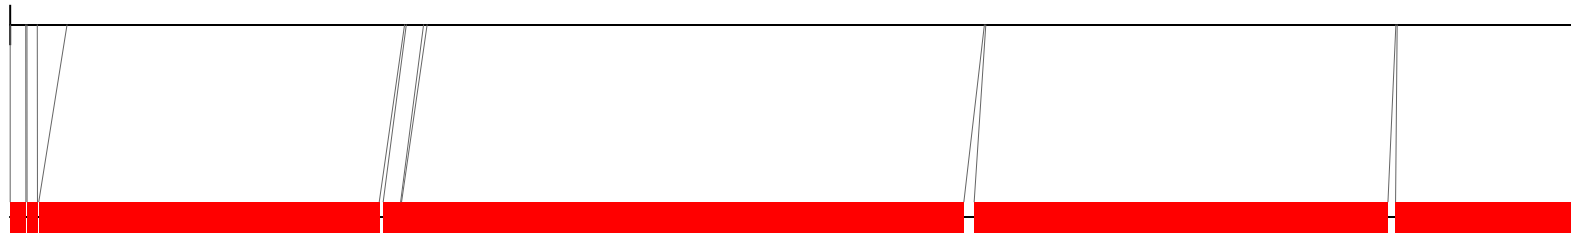

NLE13

68579355

68757213

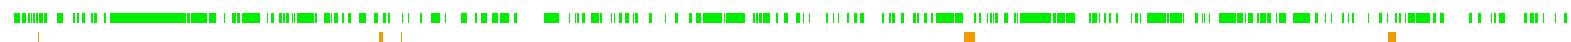

Rpts  
Gaps

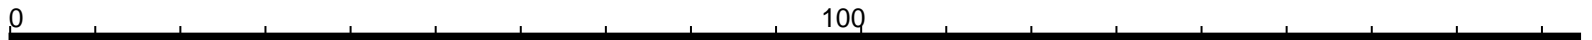

Kbases BAC

Gaps in BAC

AC166601.4

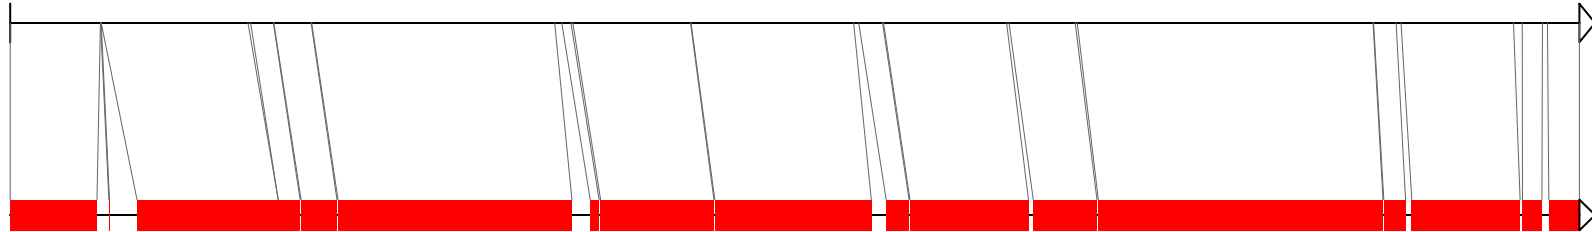

NLE13

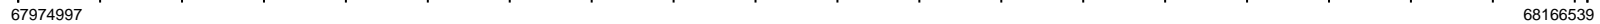

Rpts  
Gaps

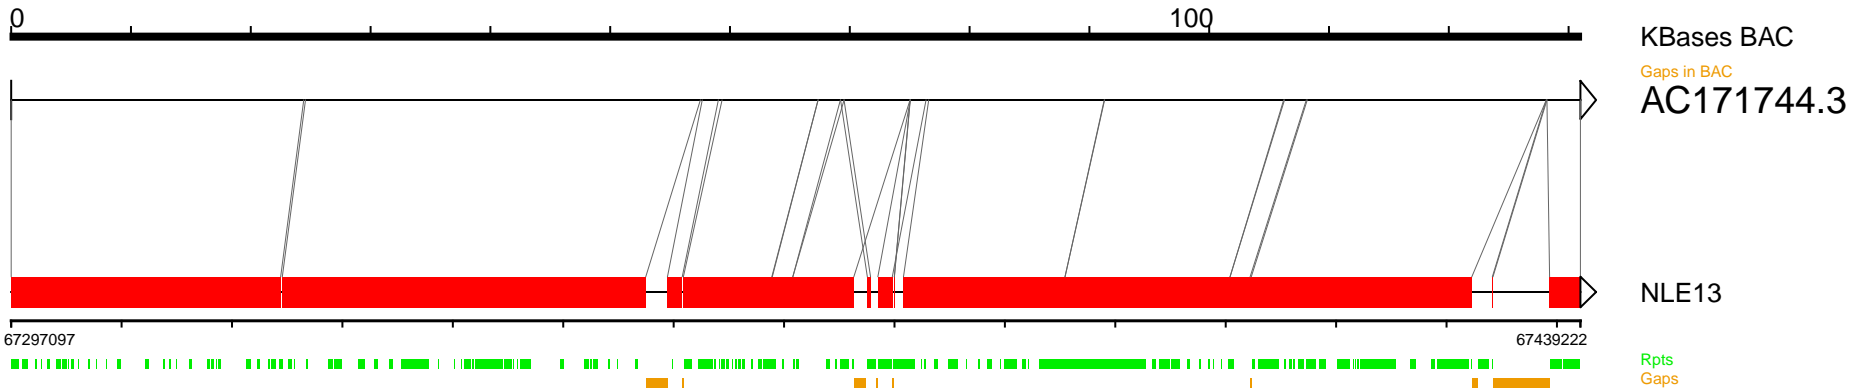

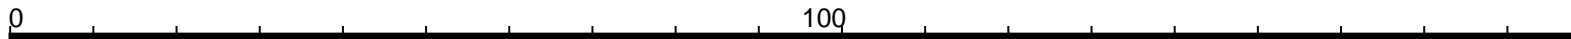

Kbases BAC

Gaps in BAC

AC173914.3

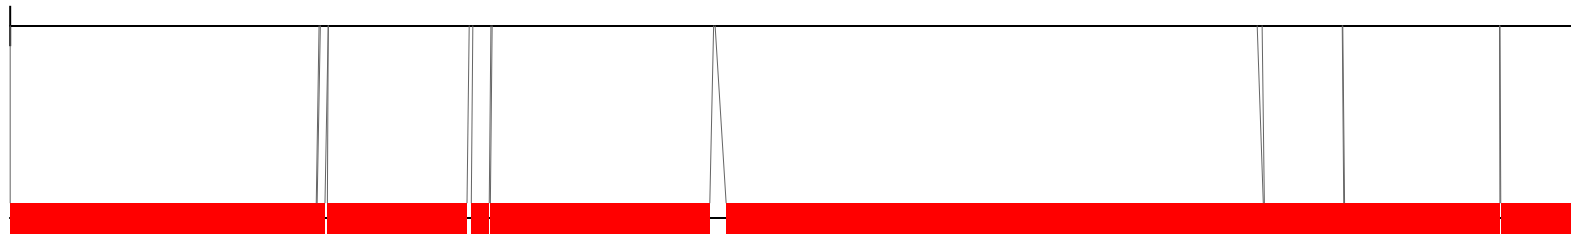

NLE13

68362920

68553301

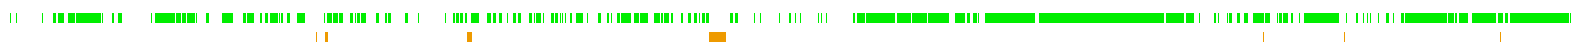

Rpts  
Gaps

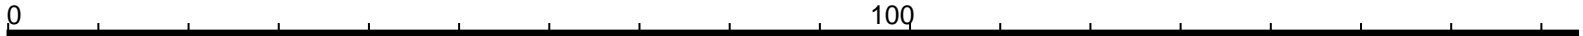

KBases BAC

Gaps in BAC

AC175614.3

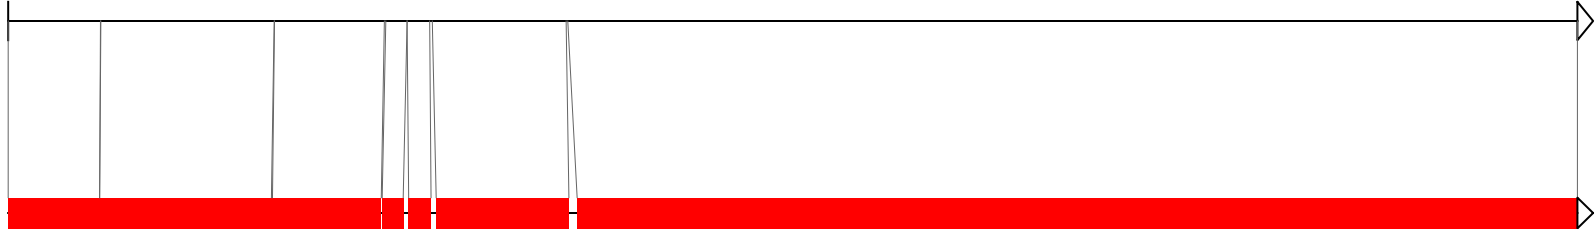

NLE13

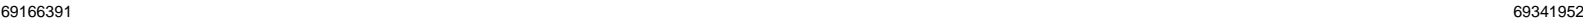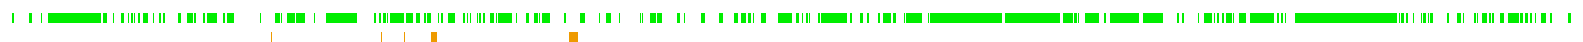

Rpts

Gaps

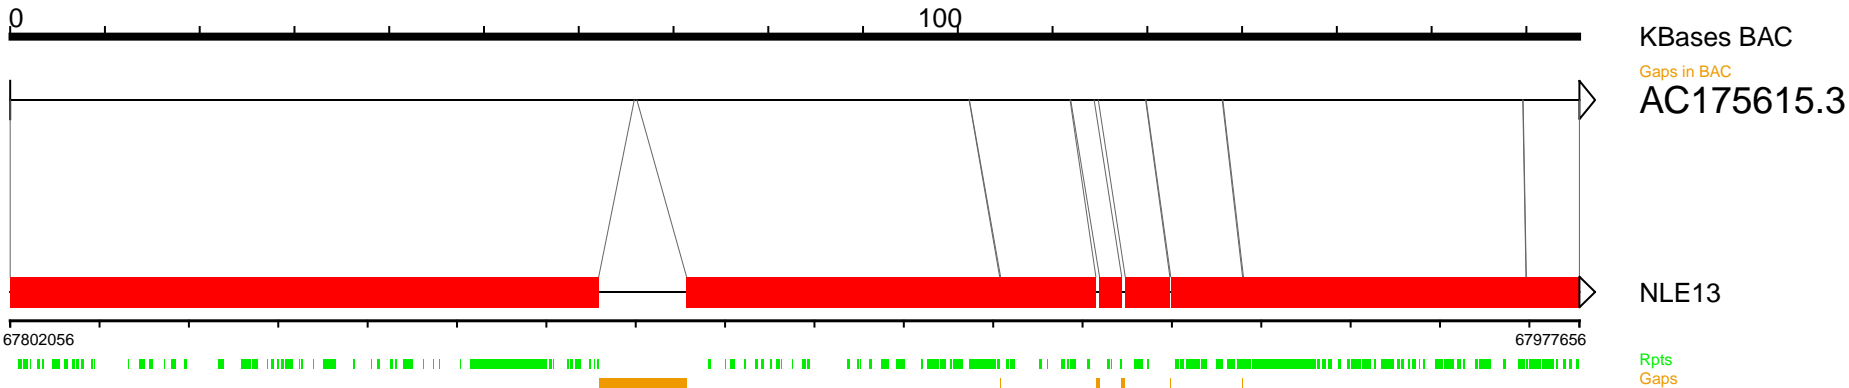

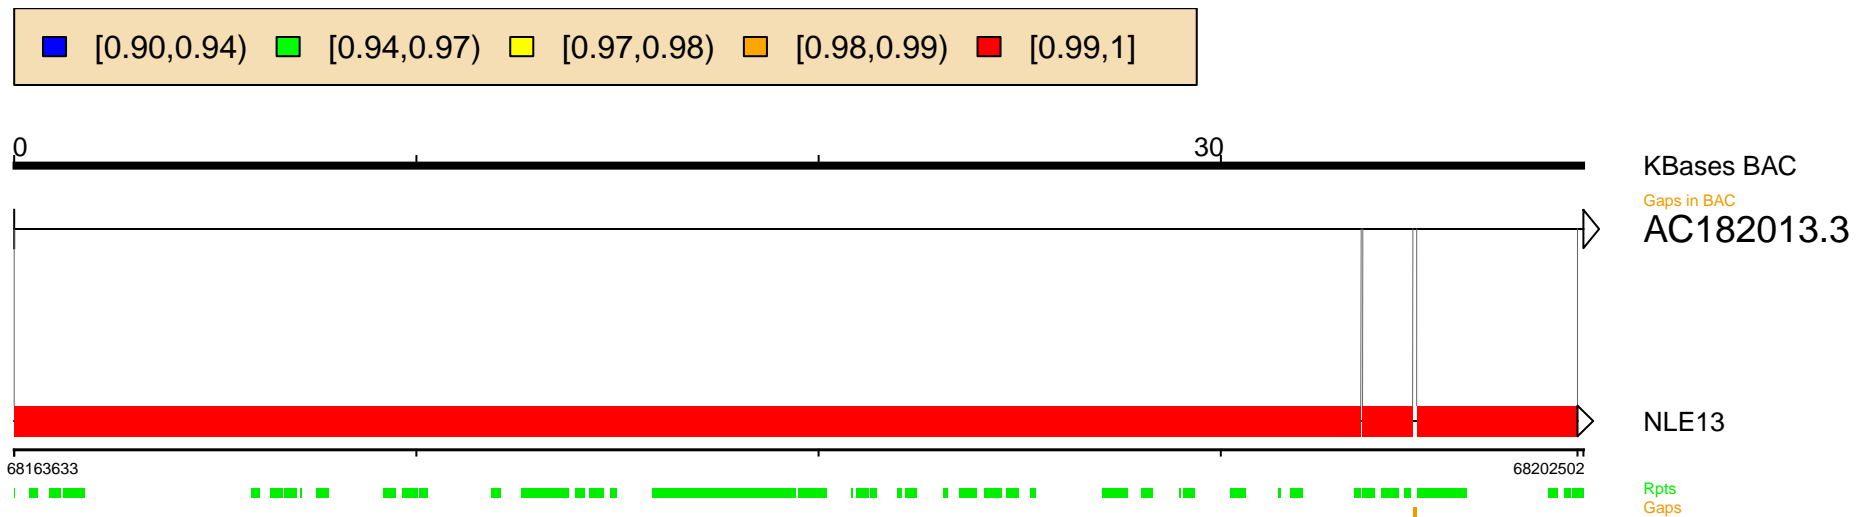



KBases BAC

Gaps in BAC

AC183705.4

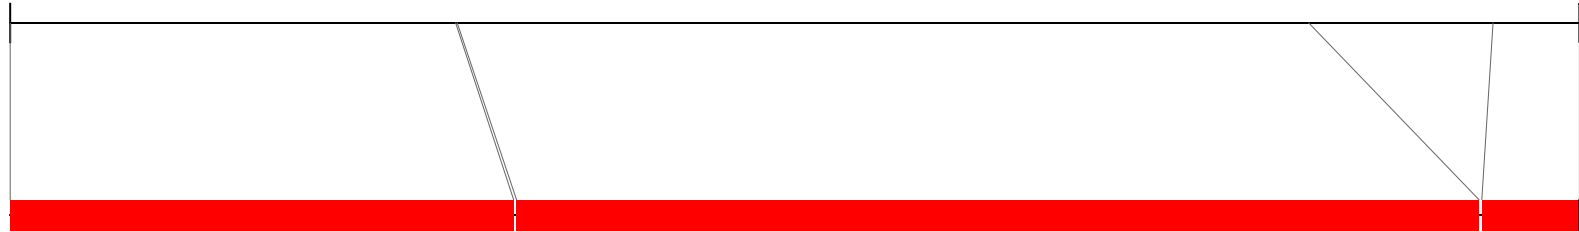

NLE13

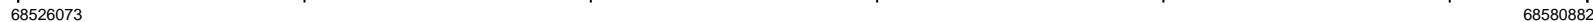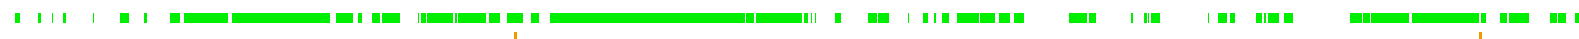

Rpts  
Gaps



KBases BAC

Gaps in BAC

AC183847.3

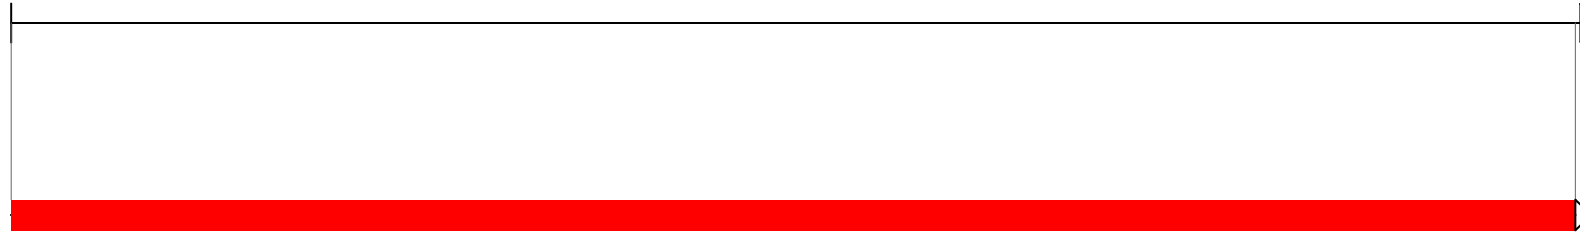

NLE13

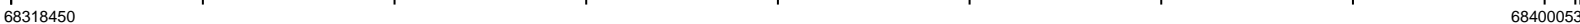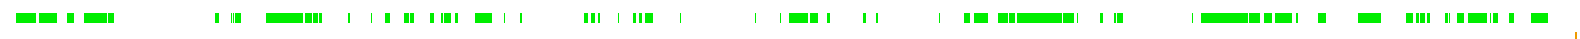

Rpts  
Gaps

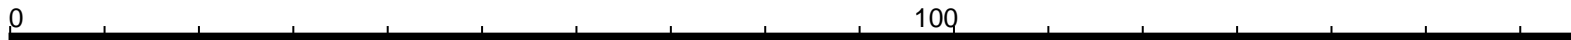

Kbases BAC

Gaps in BAC

AC185380.3

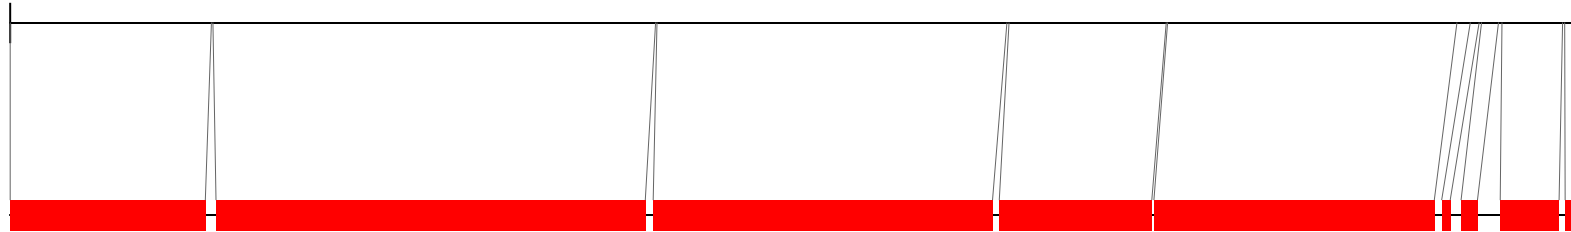

NLE13

68666133

68837556

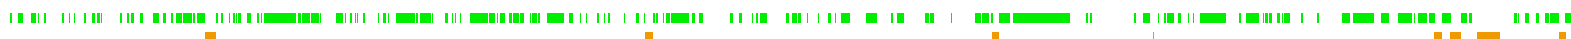

Rpts  
Gaps

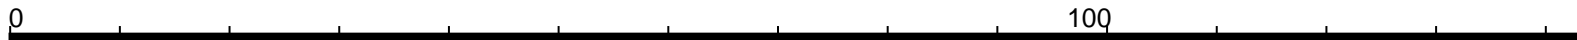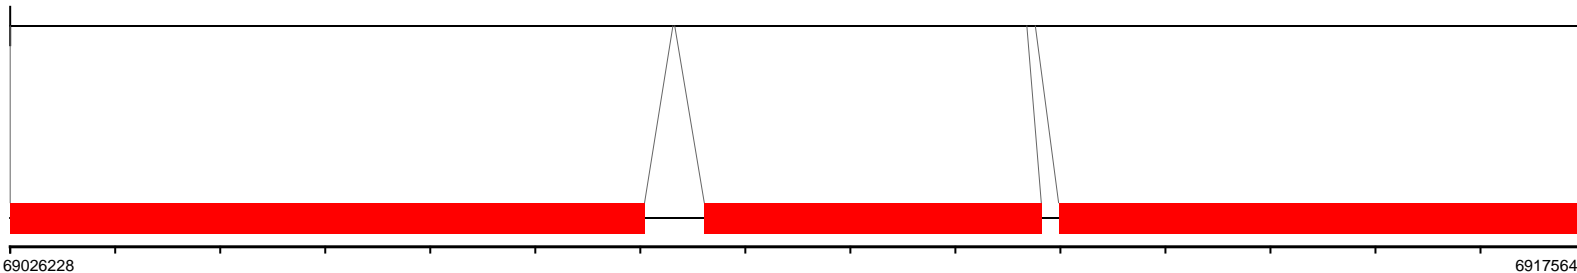

KBases BAC

Gaps in BAC

AC187424.3

NLE13

Rpts

Gaps

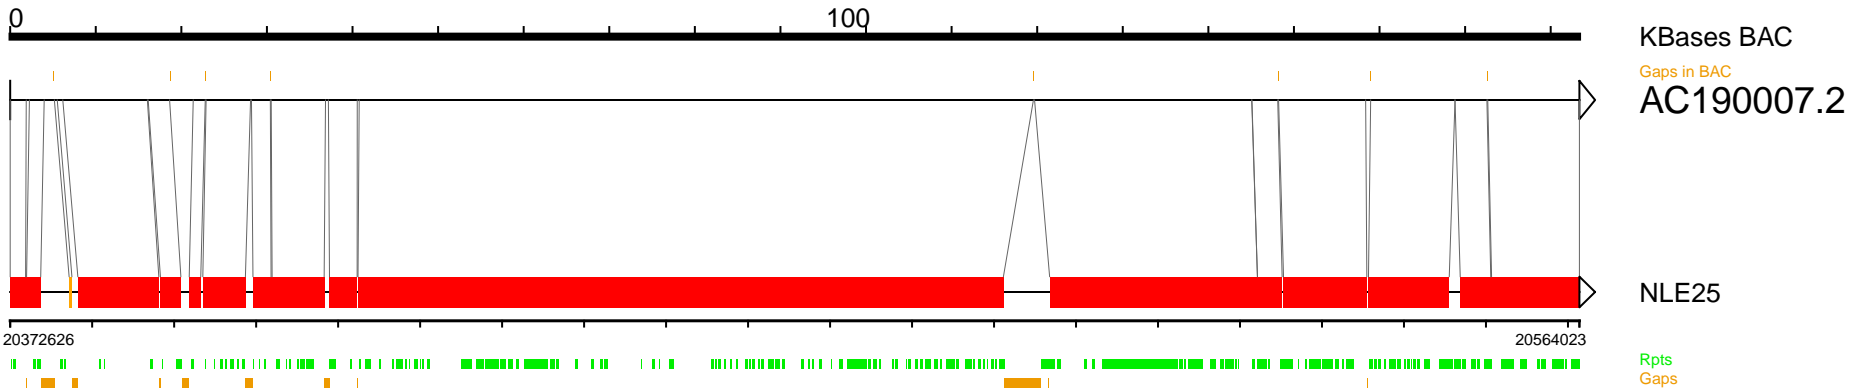

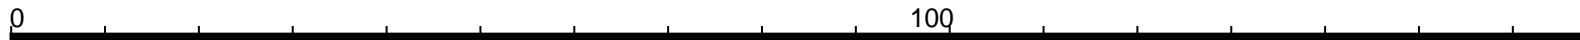

KBases BAC

Gaps in BAC

AC198096.2

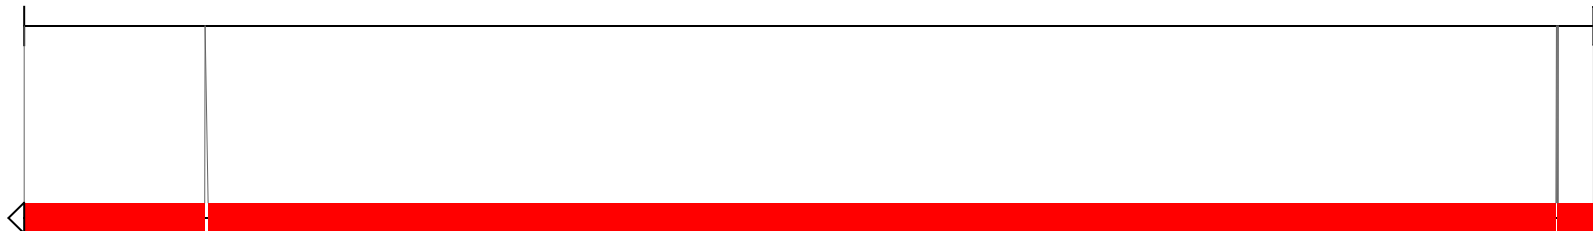

NLE10

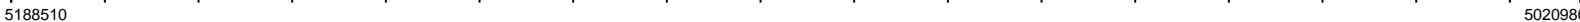

Rpts  
Gaps

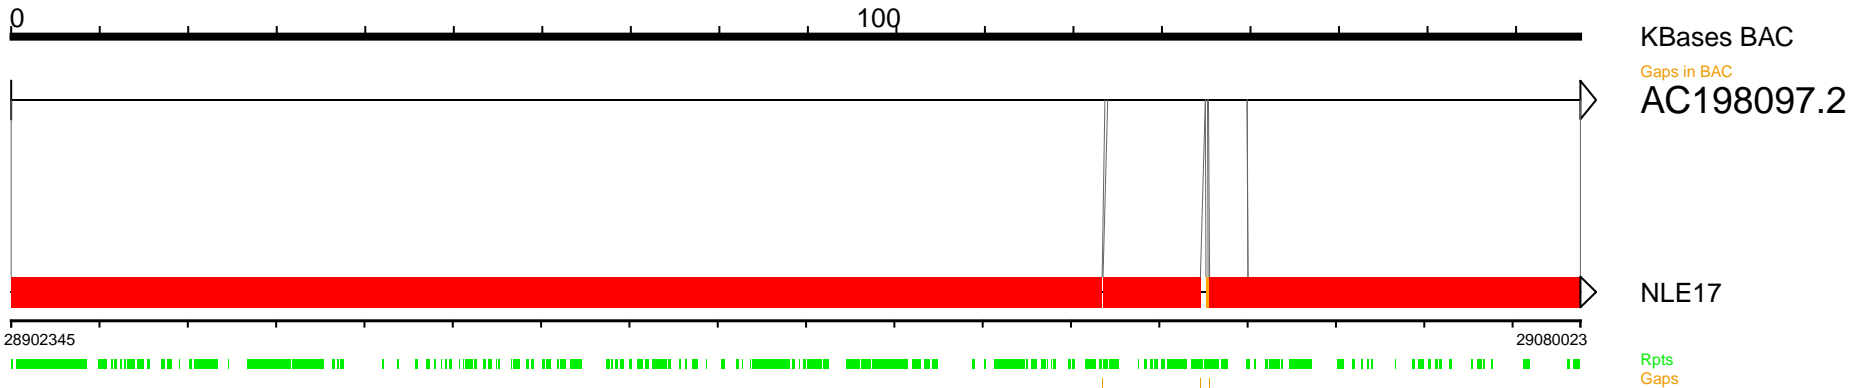

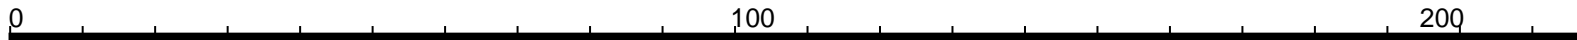

KBases BAC

Gaps in BAC

AC198098.1

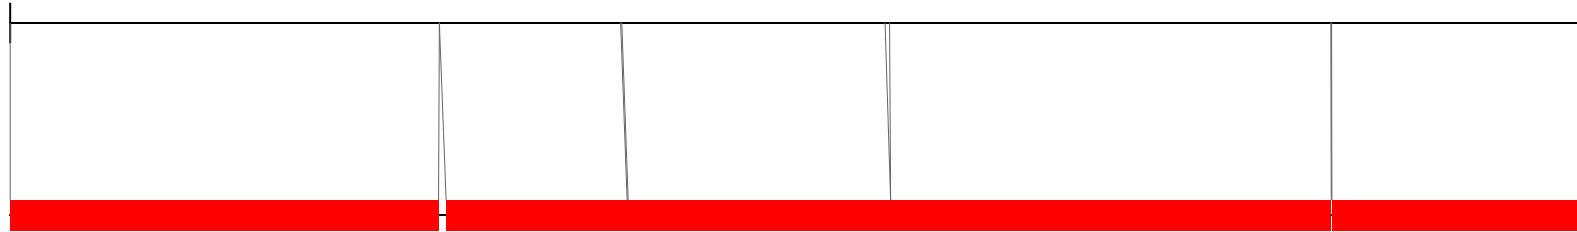

NLEX

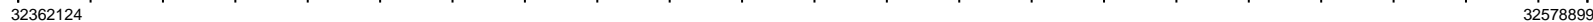

Rpts  
Gaps

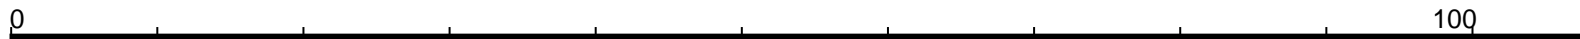

KBases BAC

Gaps in BAC

AC198099.1

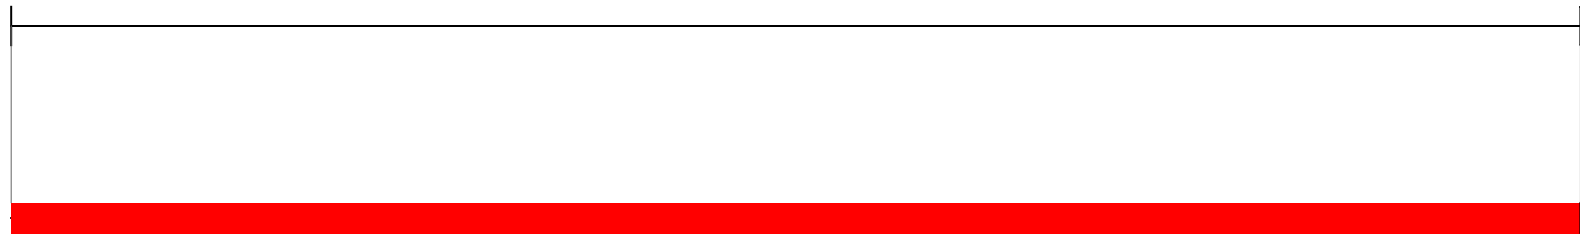

NLE11

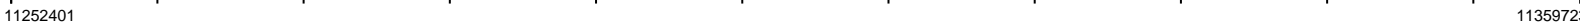

Rpts  
Gaps

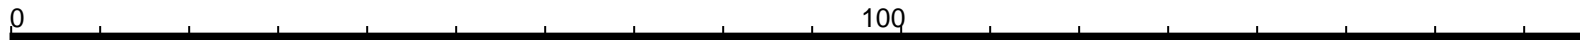

KBases BAC

Gaps in BAC

AC198100.1

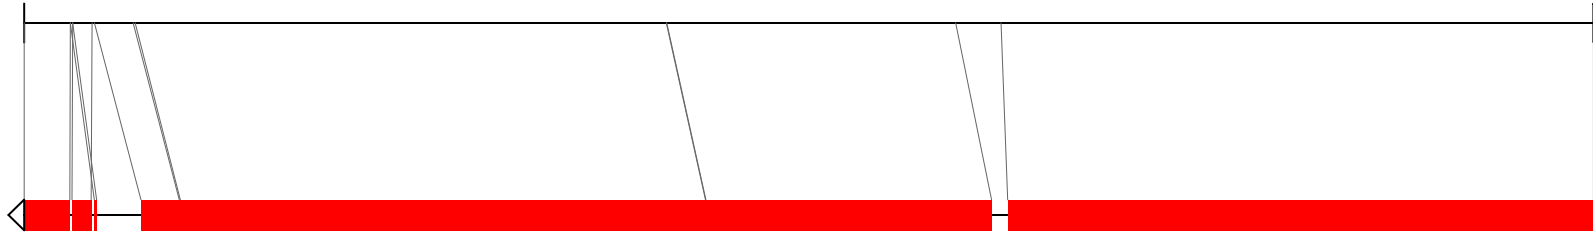

NLE1b

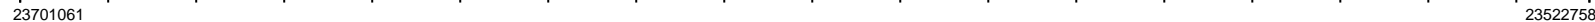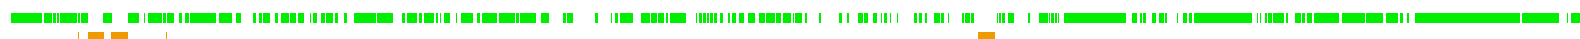

Rpts  
Gaps



KBases BAC

Gaps in BAC

AC198101.2

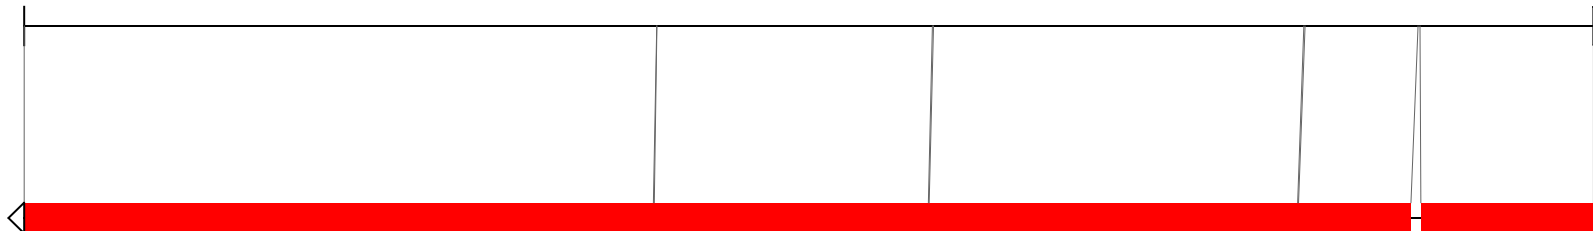

NLE16

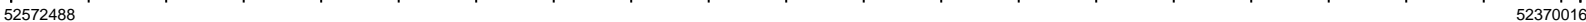

Rpts  
Gaps

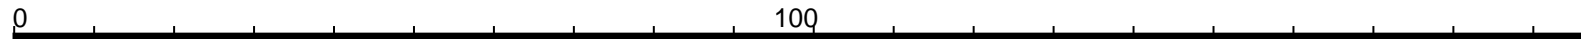

KBases BAC

Gaps in BAC

AC198102.2

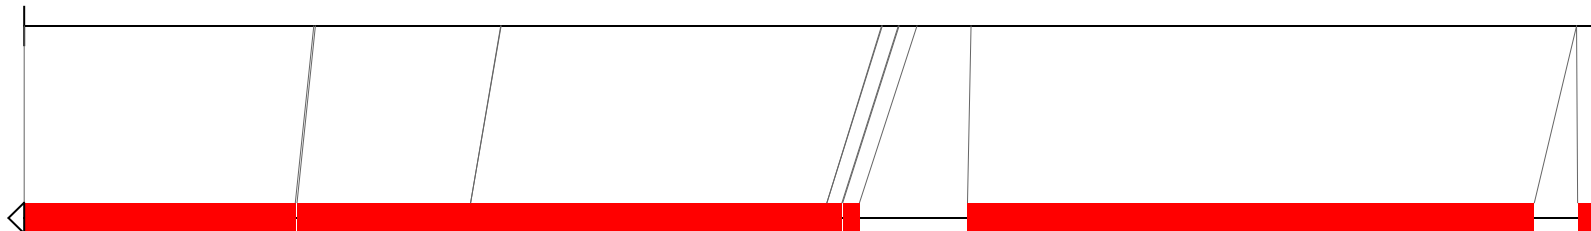

NLE2

48301306 48091795

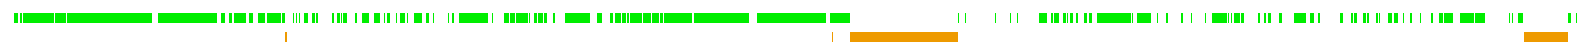

Rpts  
Gaps



KBases BAC

Gaps in BAC

AC198103.2



NLE22b

58013191 57846350

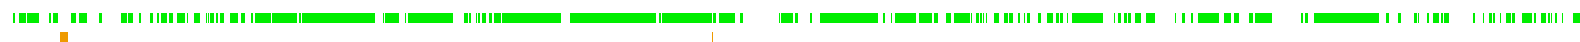

Rpts  
Gaps

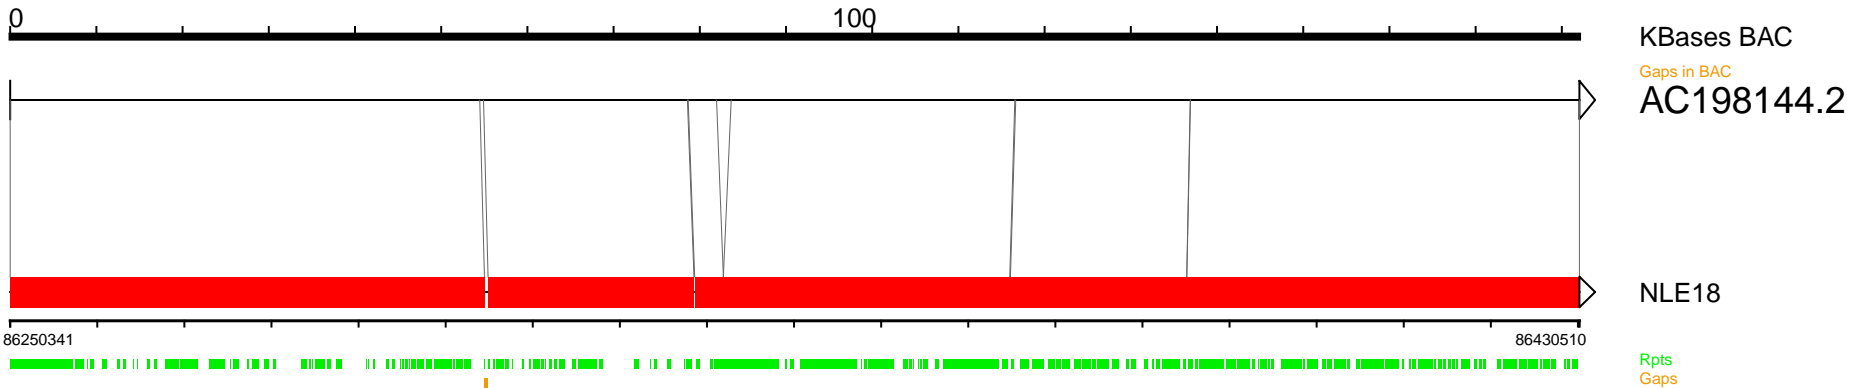

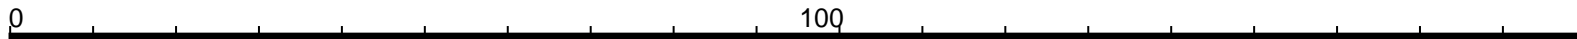

Kbases BAC

Gaps in BAC

AC198146.2

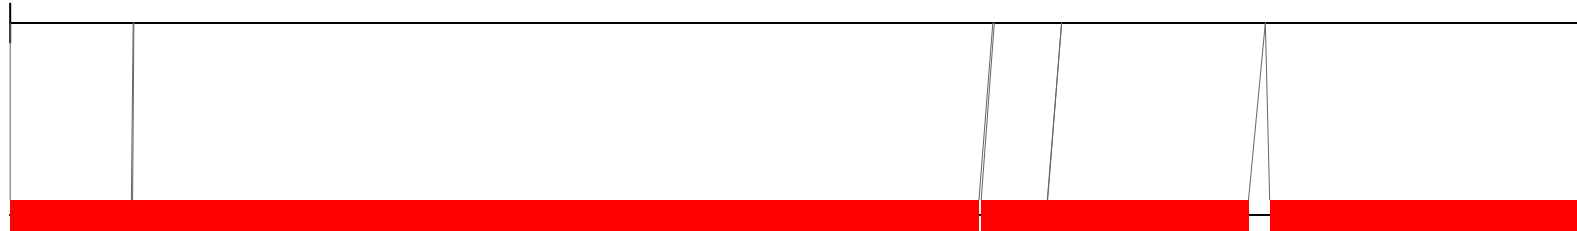

NLE8

25462697

25654620

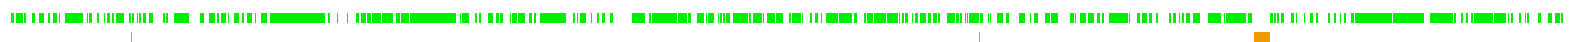

Rpts  
Gaps

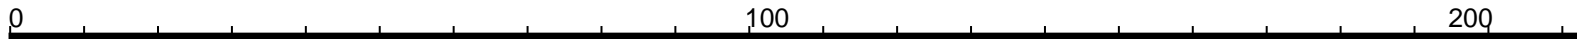

KBases BAC

Gaps in BAC

AC198147.2

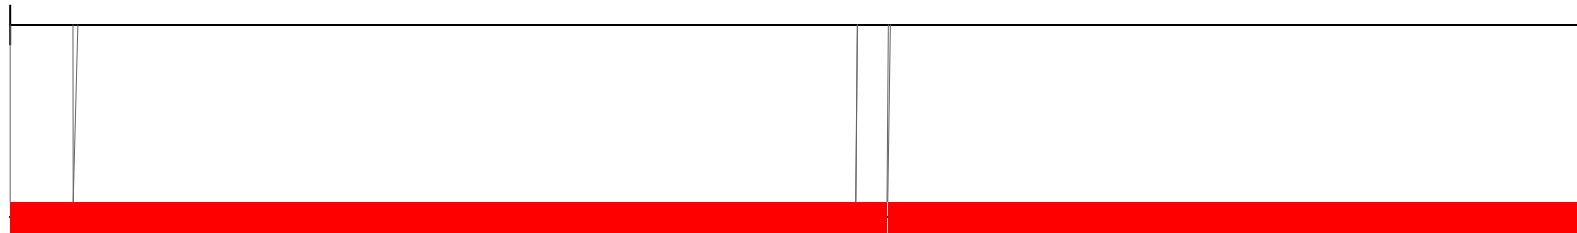

NLE5

48992427 49203943

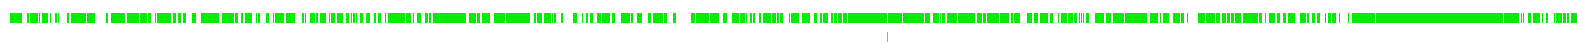

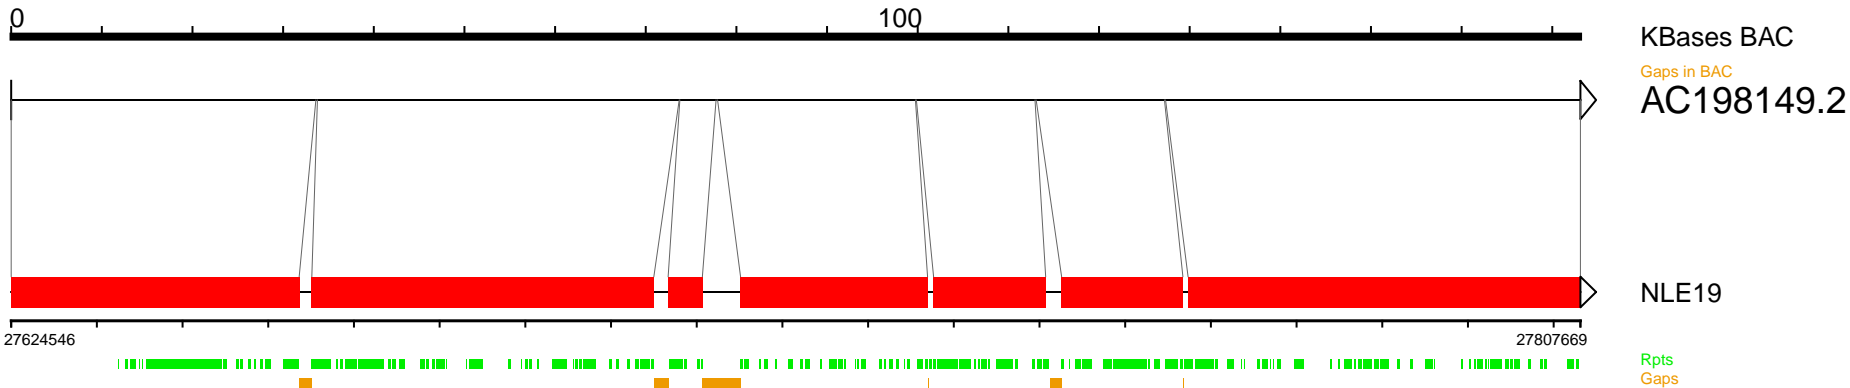

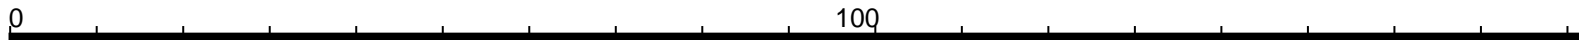

KBases BAC

Gaps in BAC

AC198150.2

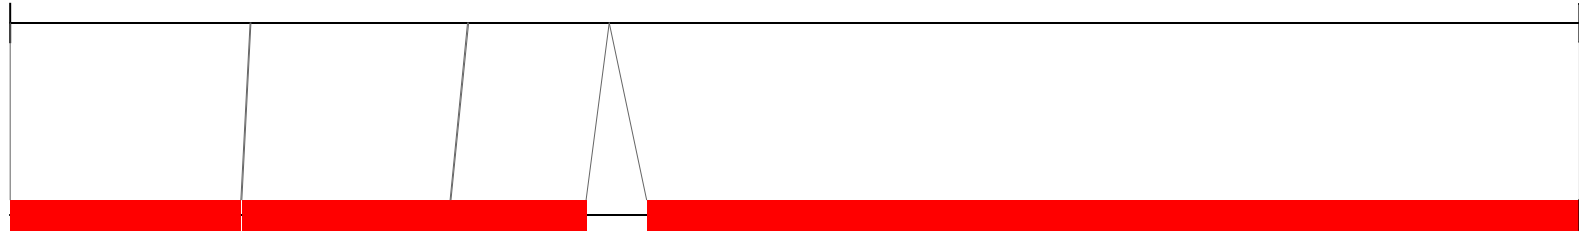

NLE22b

32797819

32986407

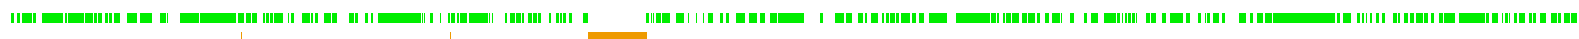

Rpts  
Gaps

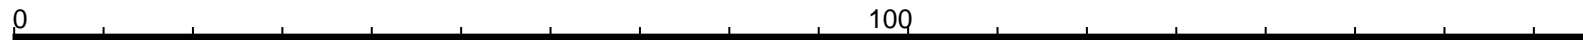

KBases BAC

Gaps in BAC

AC198151.2

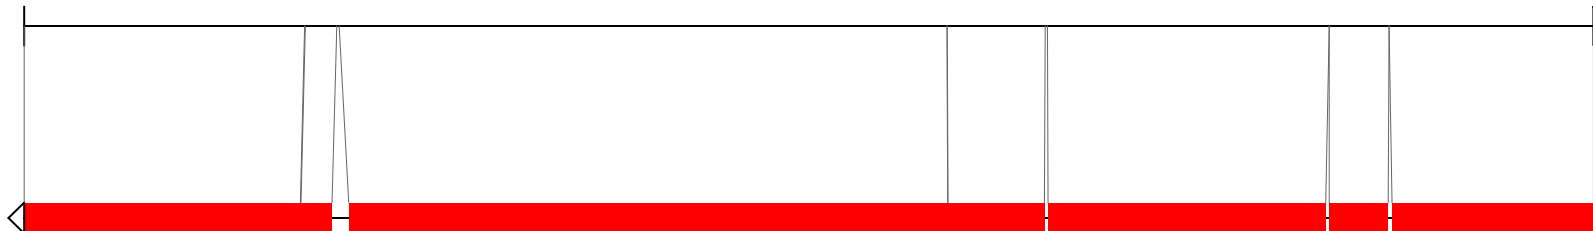

NLE3

47183000 47004926

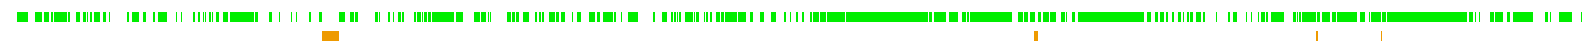

Rpts  
Gaps

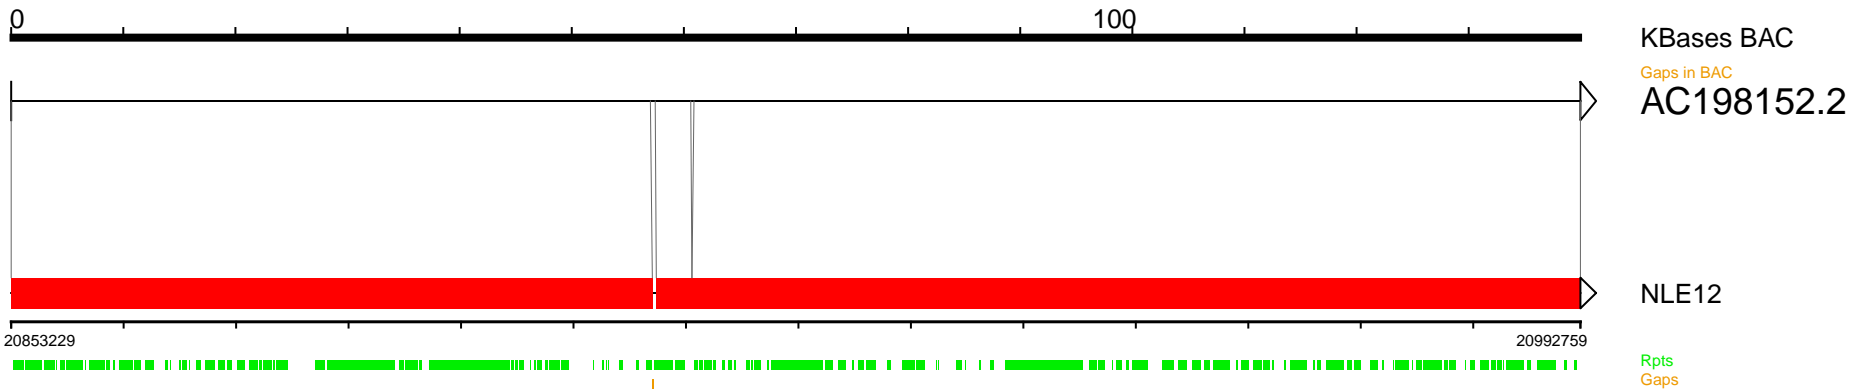

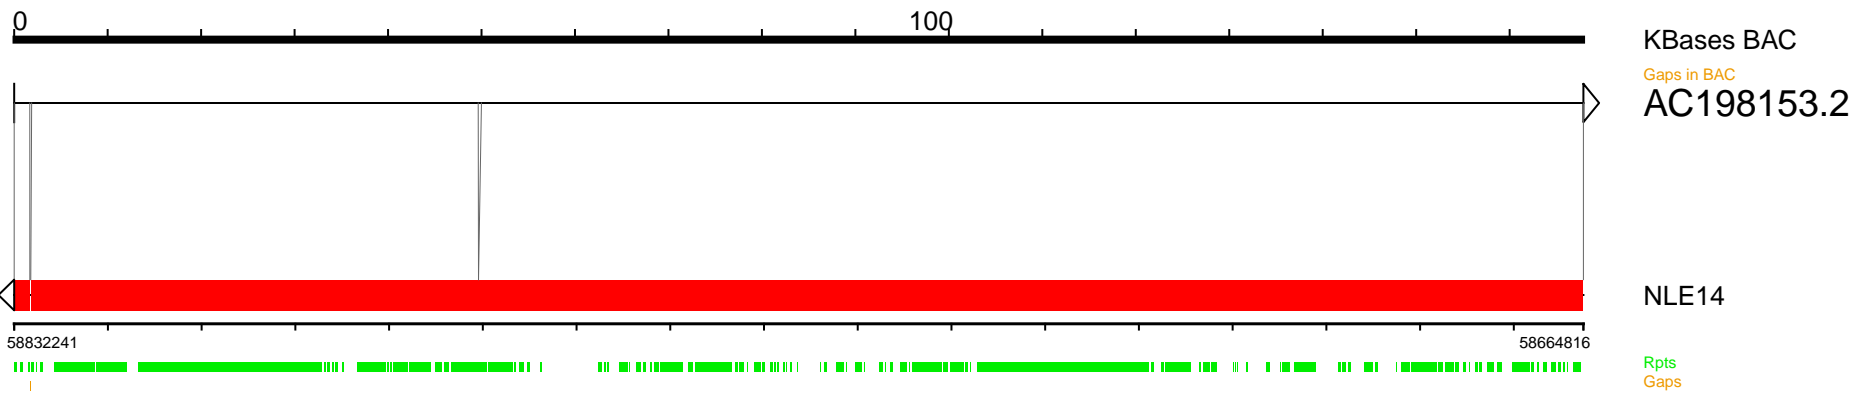

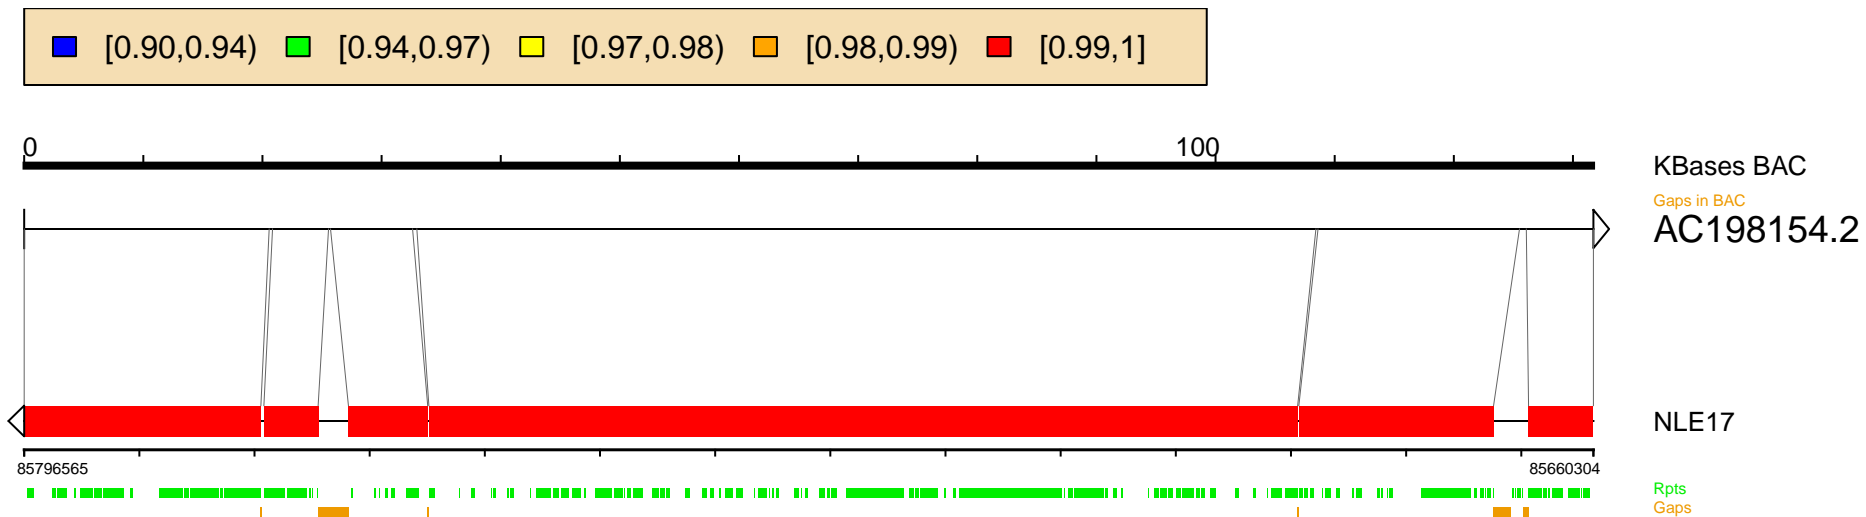

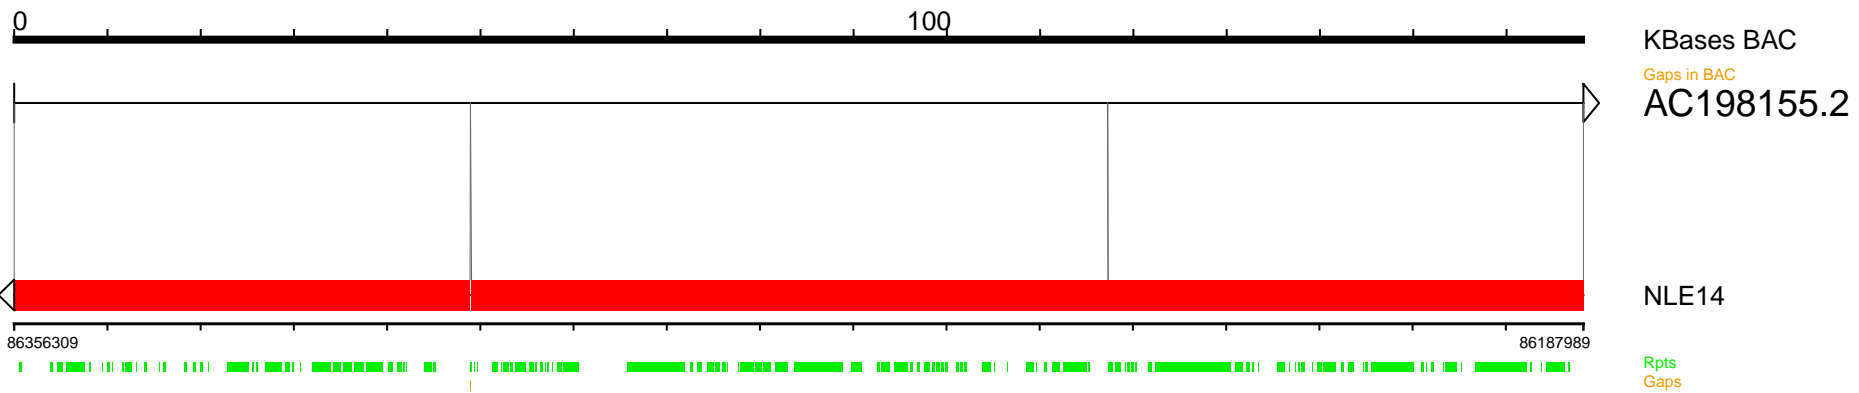

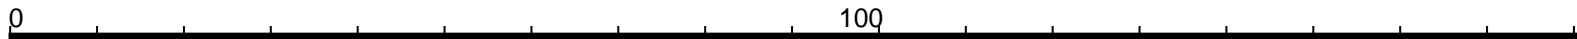

KBases BAC

Gaps in BAC

AC198183.2

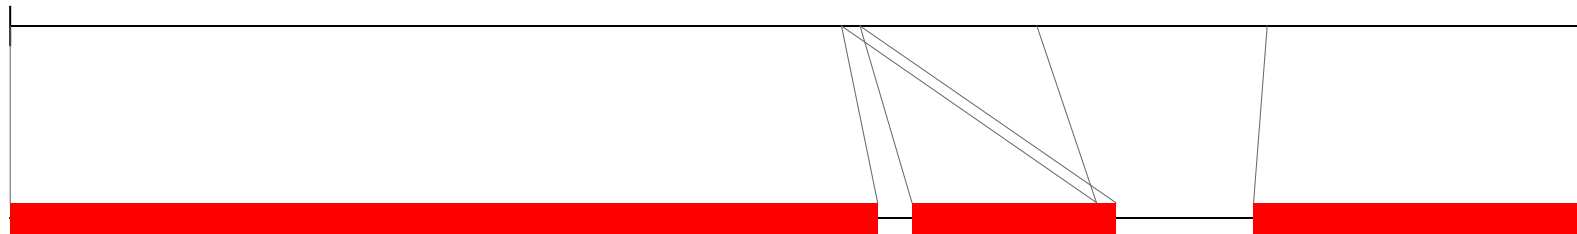

NLE7

63098046

63271143

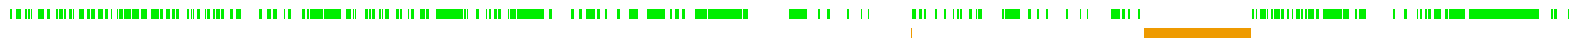

Rpts  
Gaps

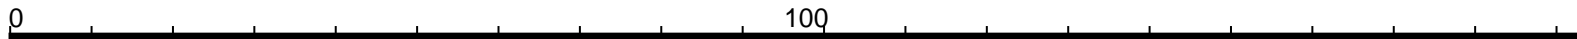

KBases BAC

Gaps in BAC

AC198526.1

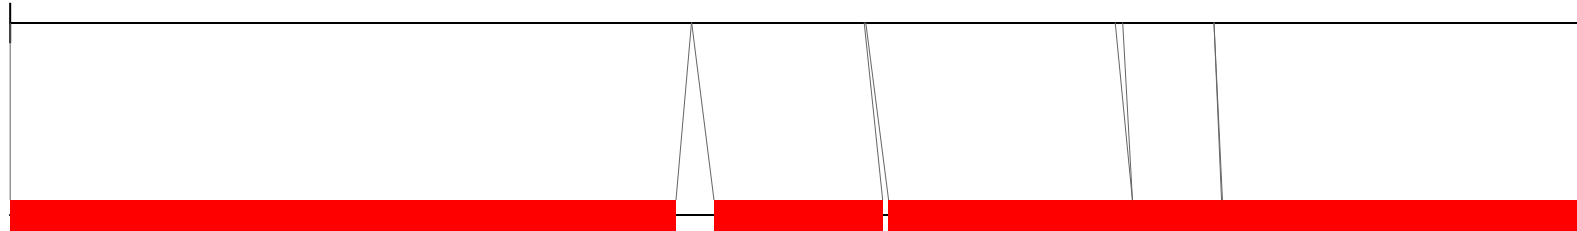

NLE21

52704557

52901725

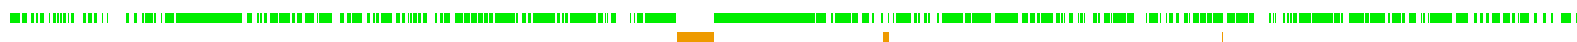

Rpts  
Gaps

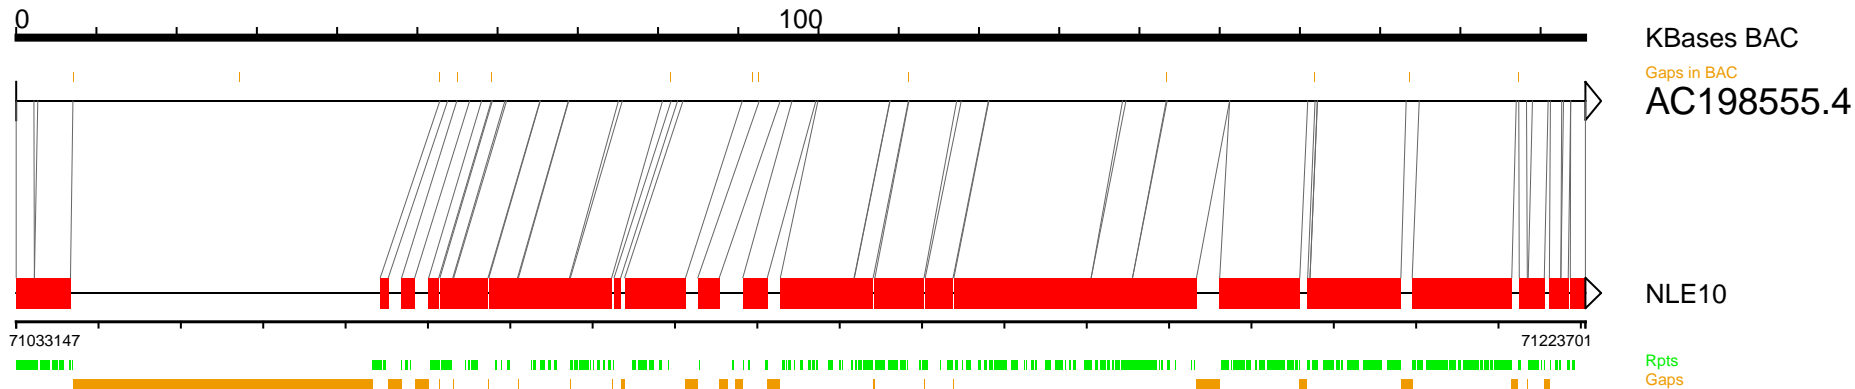

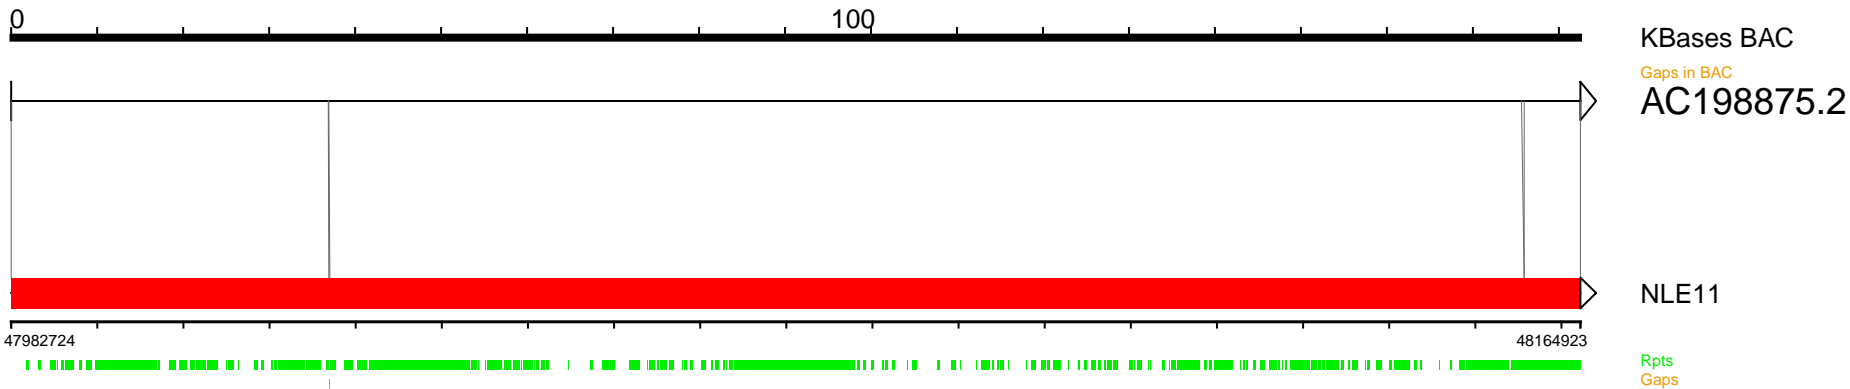

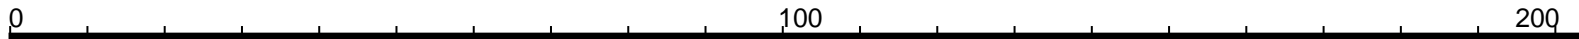

KBases BAC

Gaps in BAC

AC198945.2

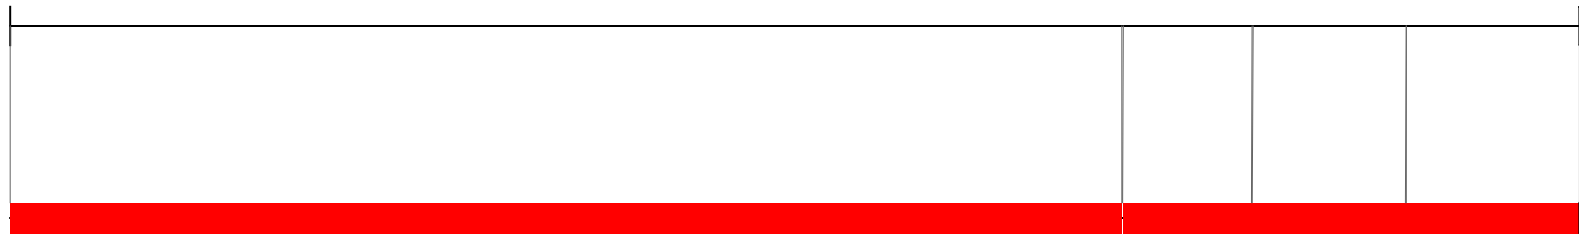

NLE9

94208438

94411463

Rpts  
Gaps

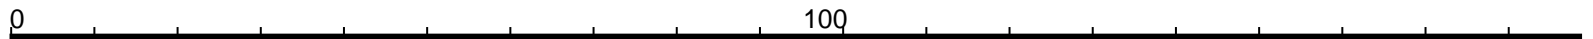

Kbases BAC

Gaps in BAC

AC201716.3

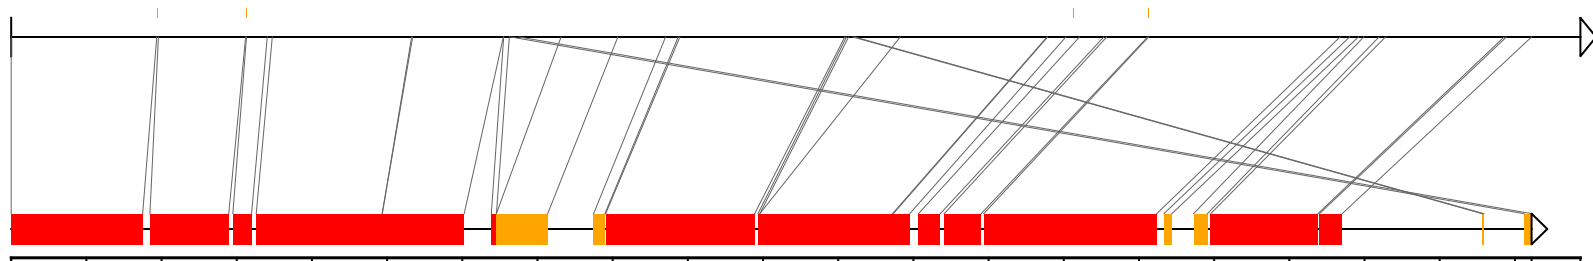

NLE8

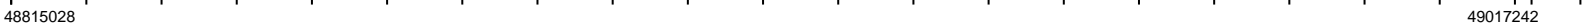

Rpts  
Gaps

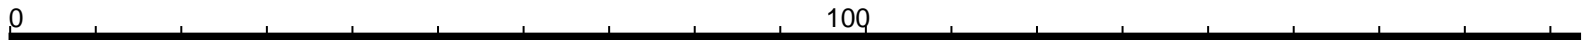

Kbases BAC

Gaps in BAC

AC202246.3

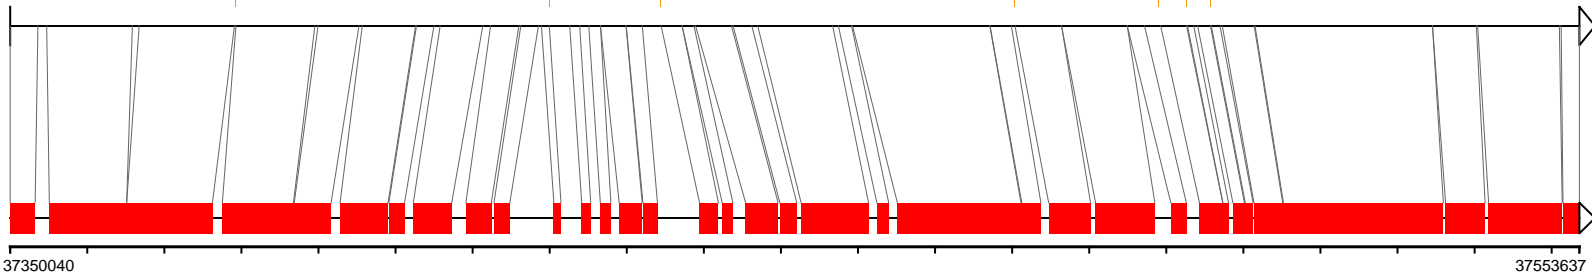

NLE13

Rpts  
Gaps

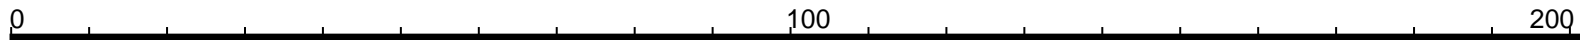

Kbases BAC  
AC202251.3

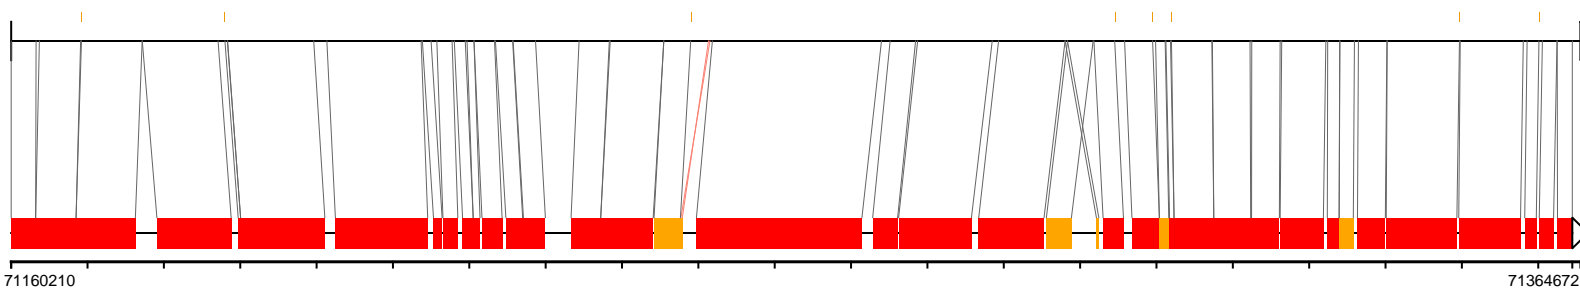

NLE10

Rpts  
Gaps

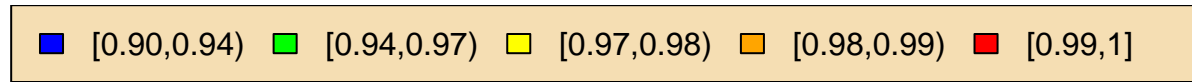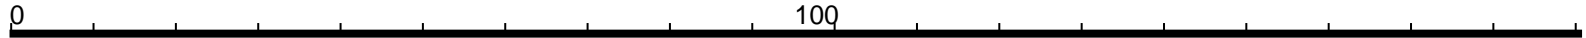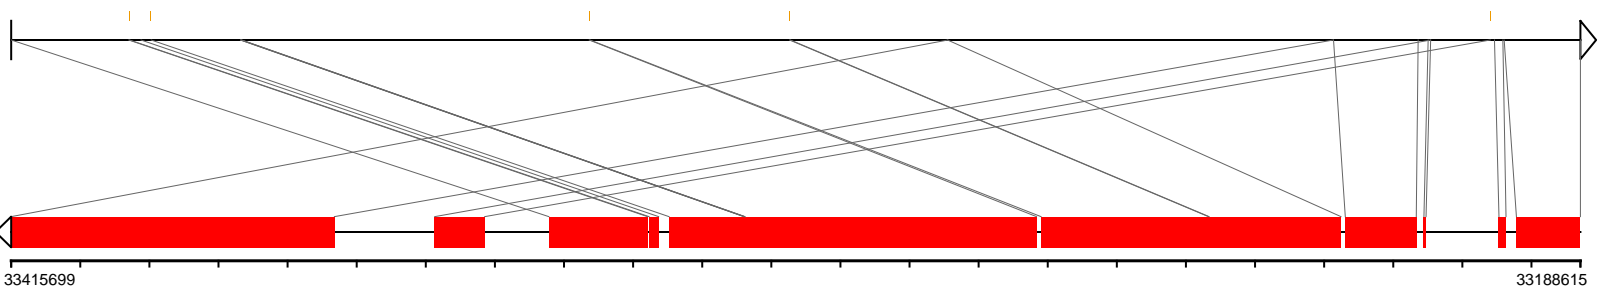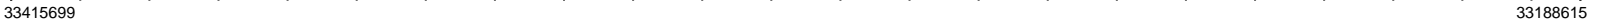

KBases BAC

Gaps in BAC

AC202649.3

NLEX

Rpts

Gaps

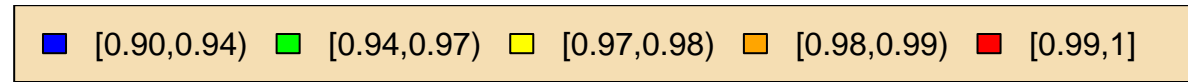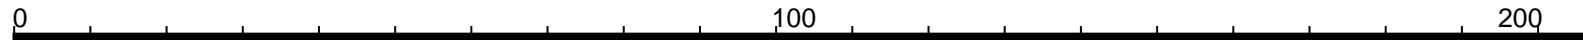

KBases BAC

Gaps in BAC

AC203119.2

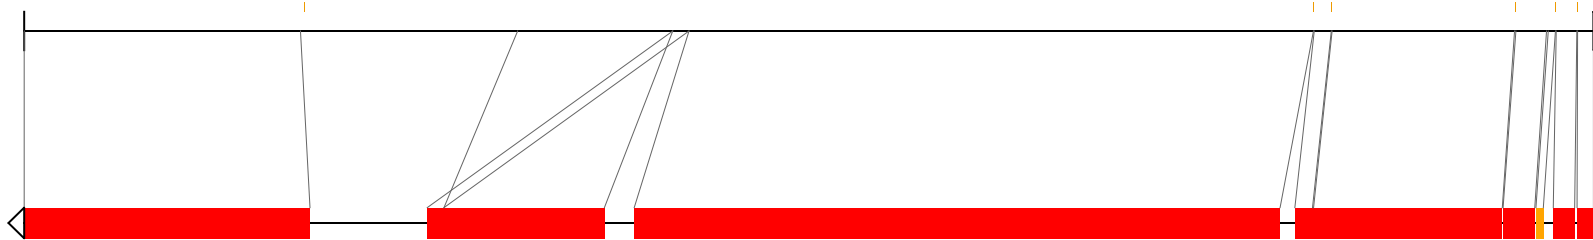

NLE7

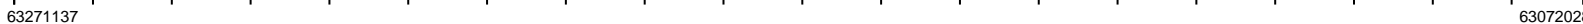

Rpts  
Gaps

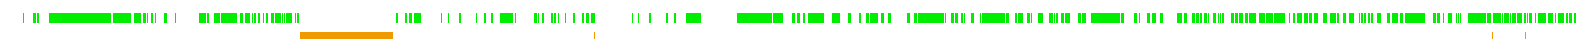

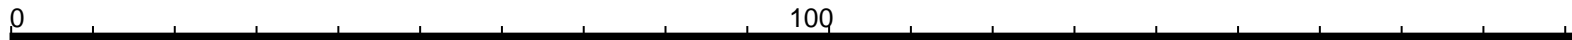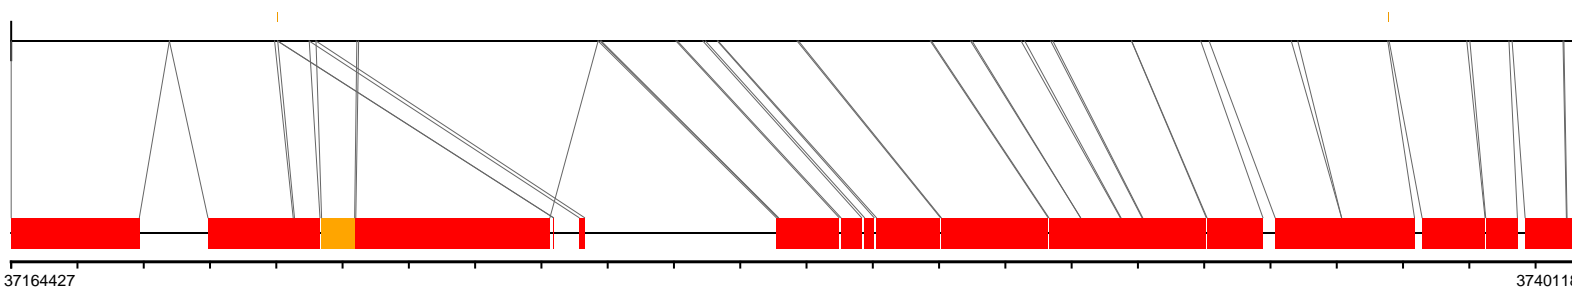

KBases BAC  
Gaps in BAC  
AC203485.2

NLE13

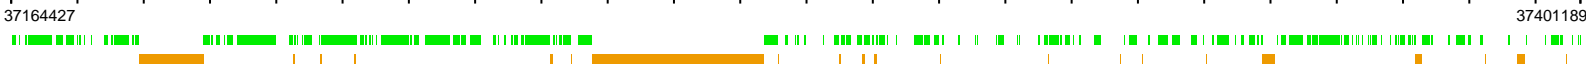

Rpts  
Gaps

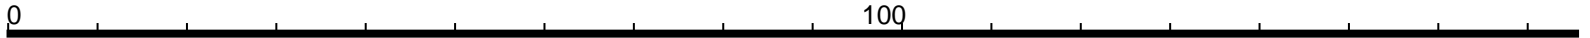

KBases BAC

Gaps in BAC

AC203487.2

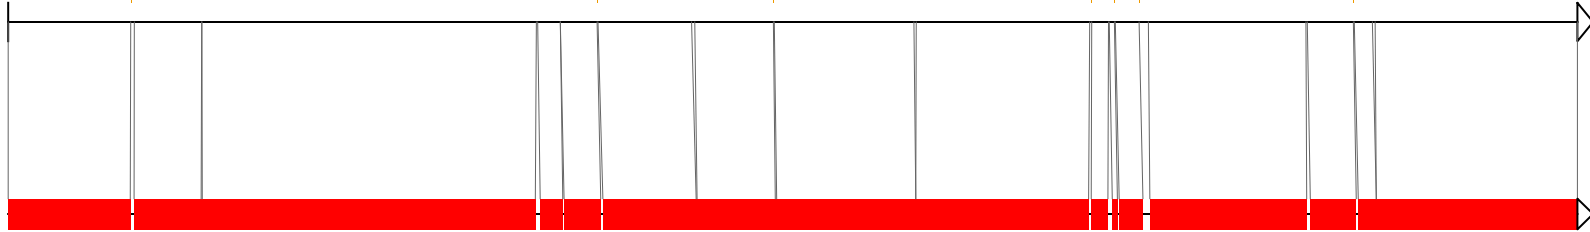

NLE3

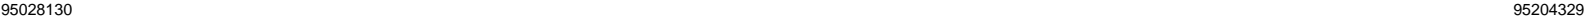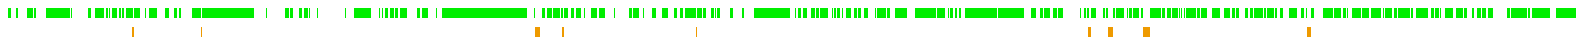

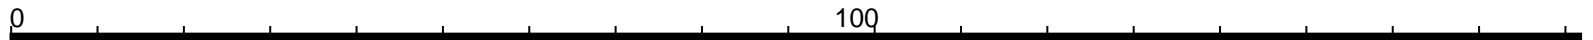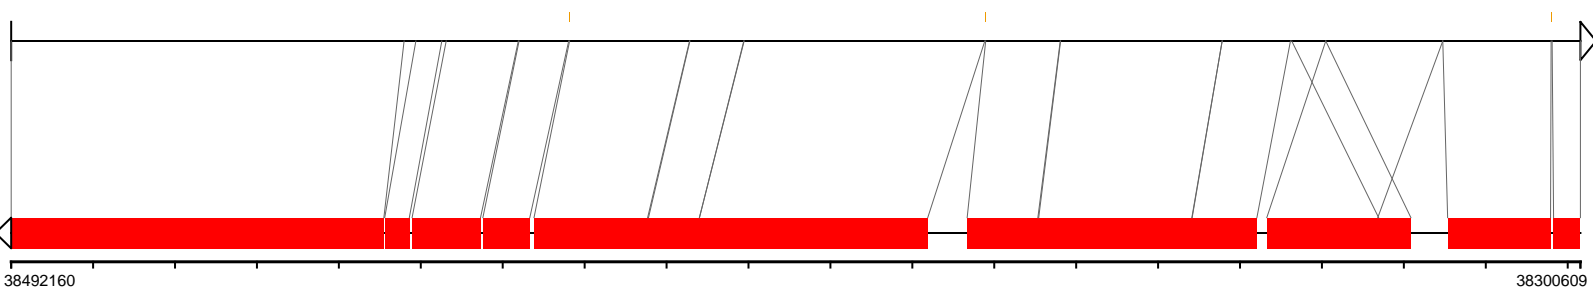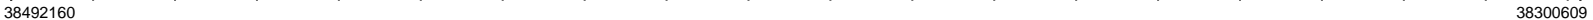

KBases BAC  
AC203709.2

NLE2

Rpts  
Gaps

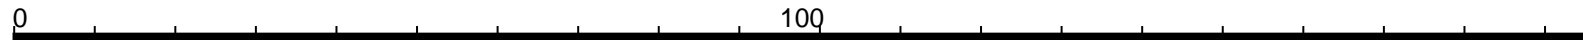

Kbases BAC

Gaps in BAC

AC203710.2

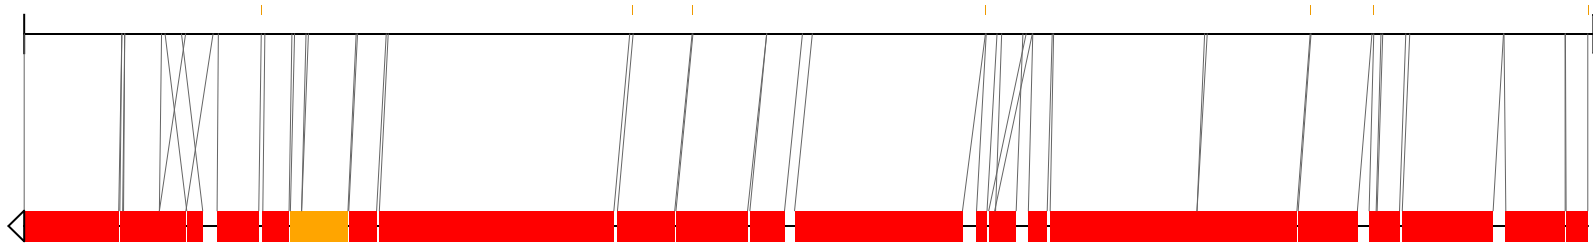

NLE2

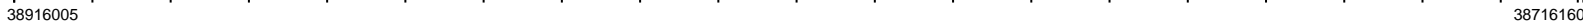

Rpts  
Gaps

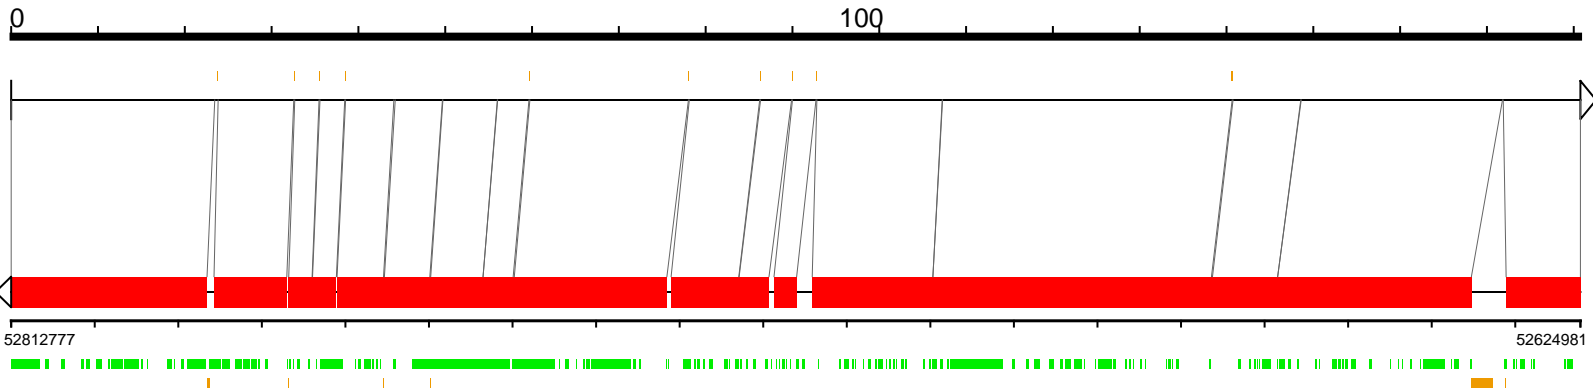

Kbases BAC  
Gaps in BAC  
AC203711.2

NLE4

Rpts  
Gaps

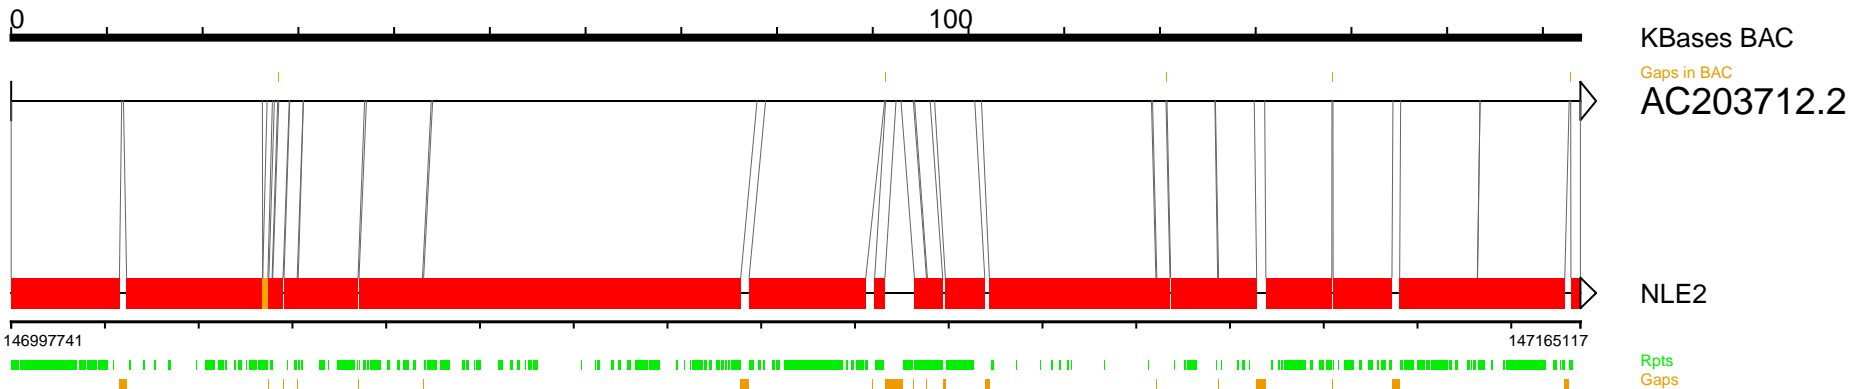

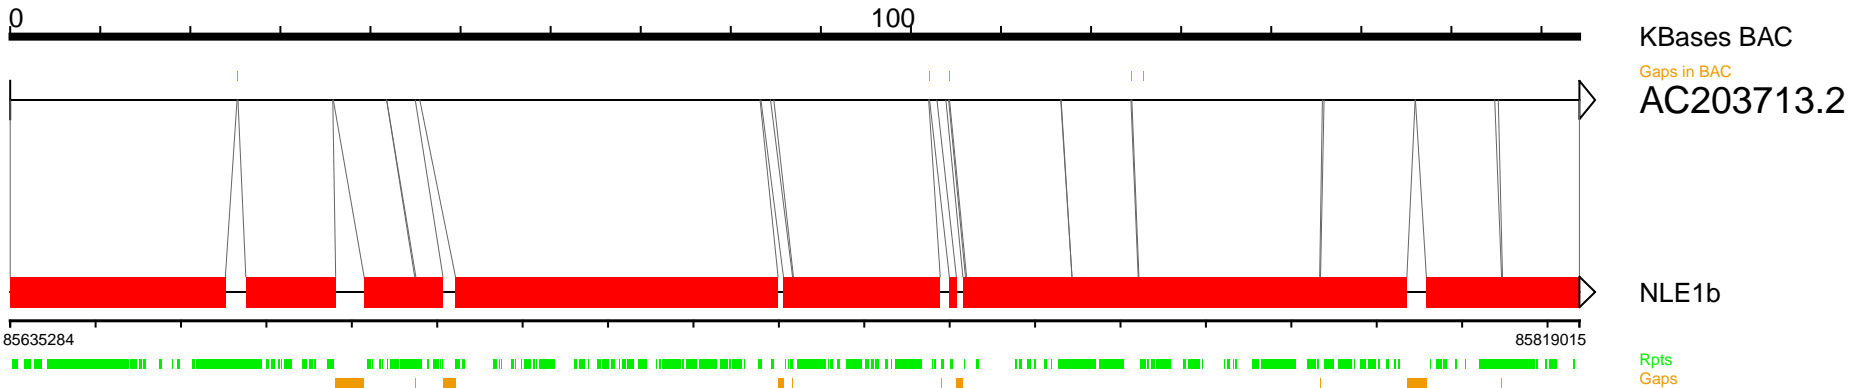

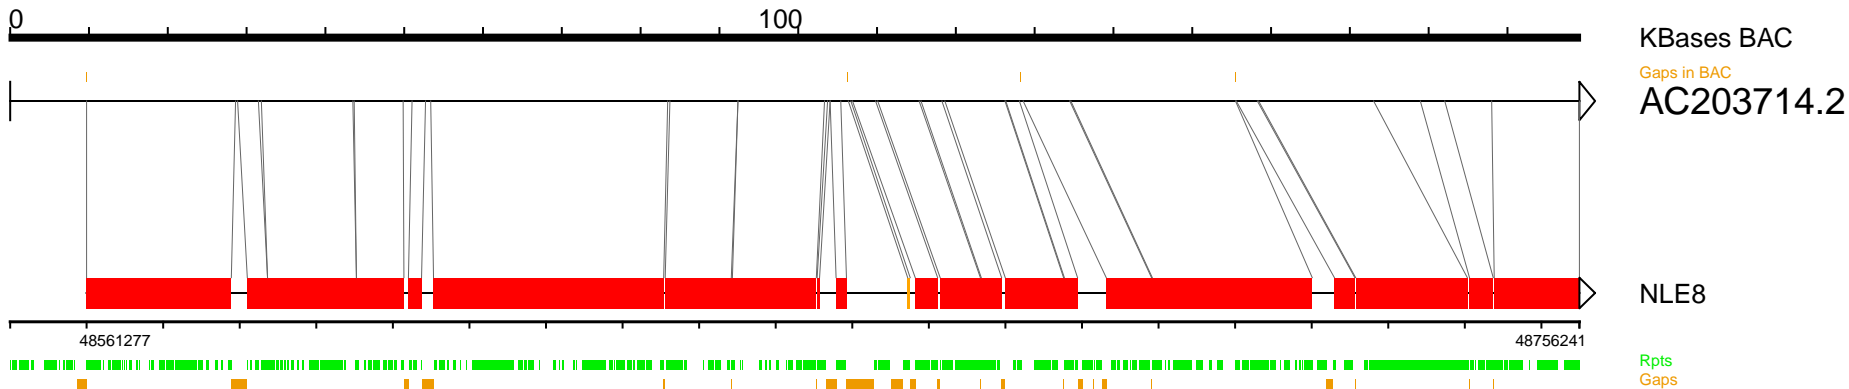

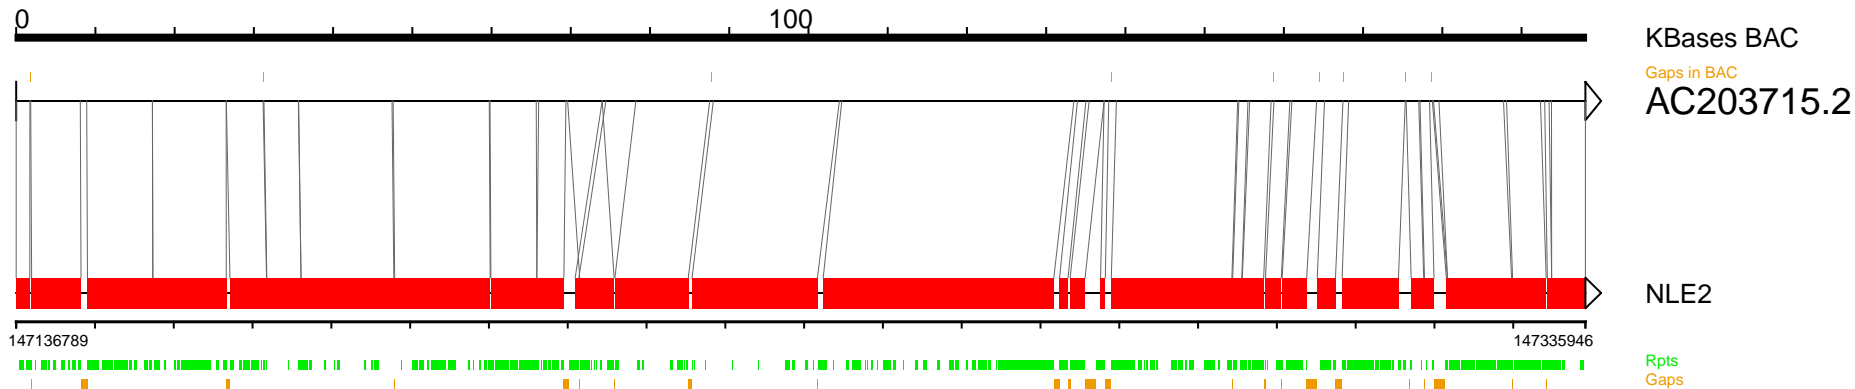

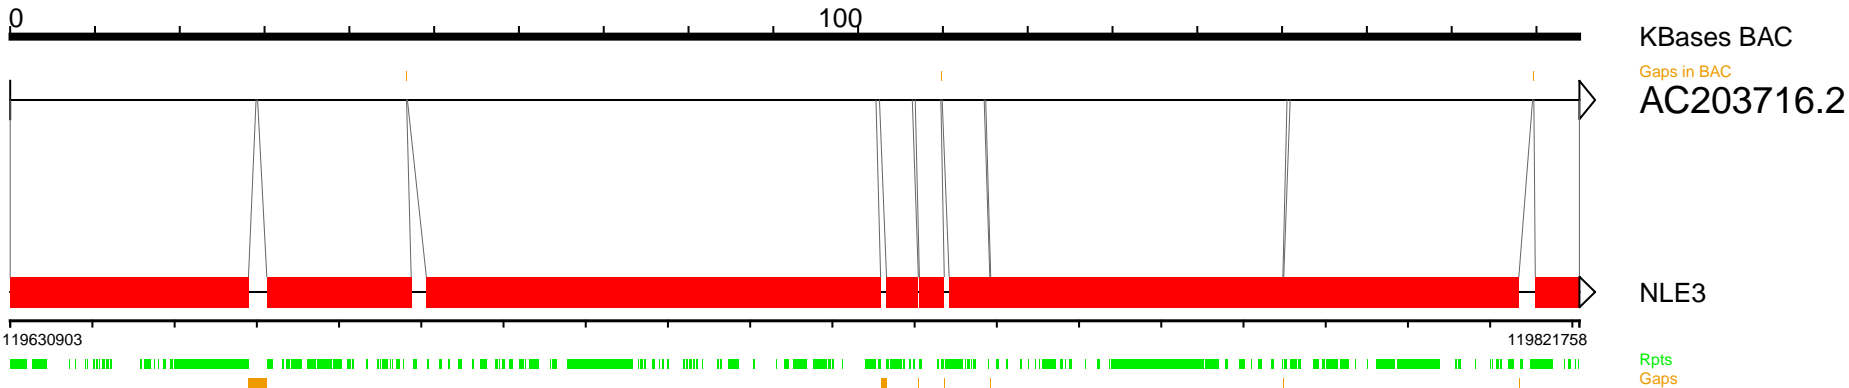

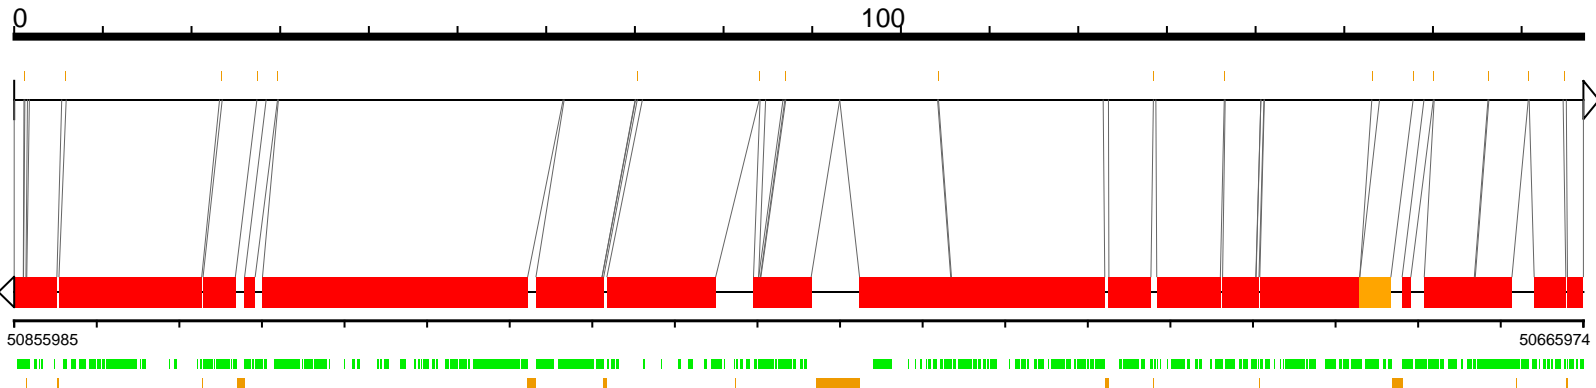

Kbases BAC  
Gaps in BAC  
AC203717.2

NLE12

Rpts  
Gaps

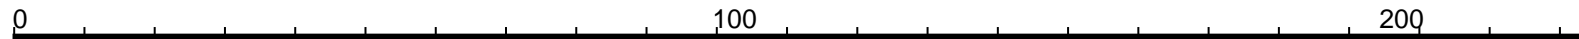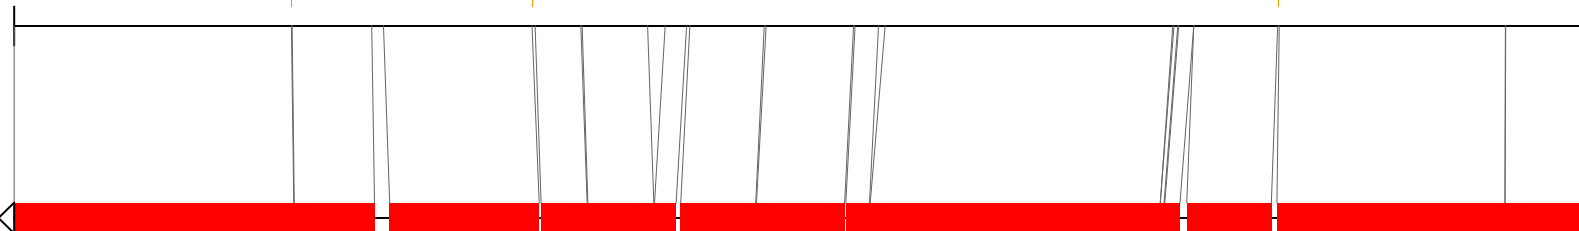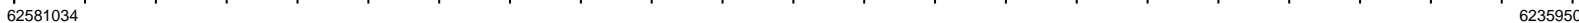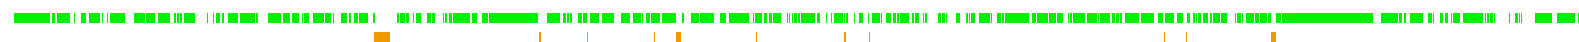

KBases BAC

Gaps in BAC

AC203718.2

NLE7

Rpts  
Gaps

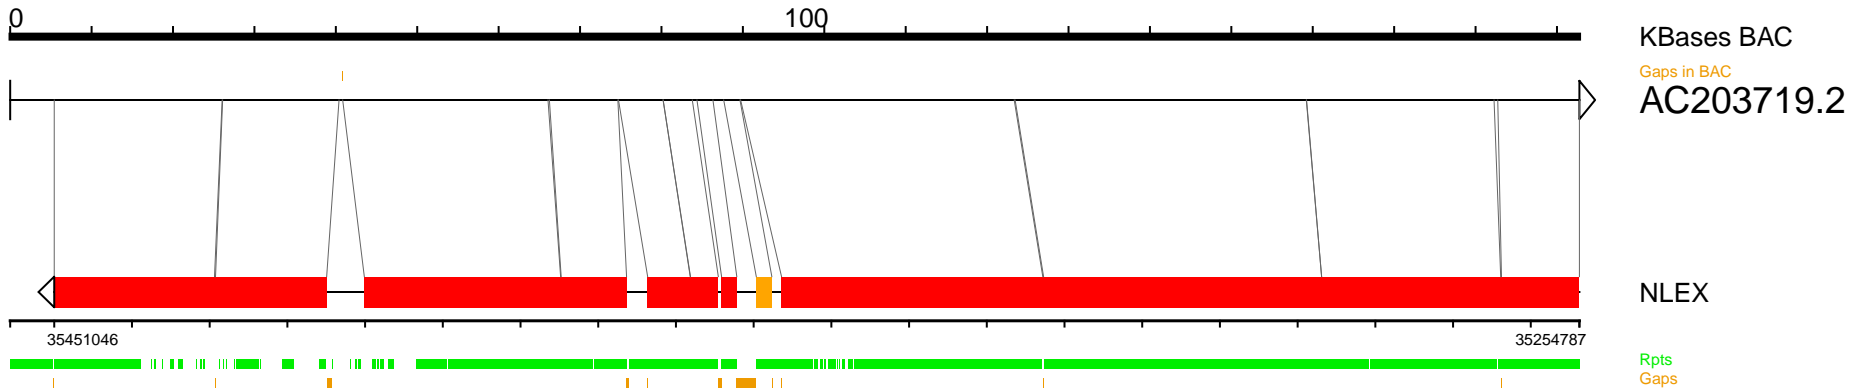

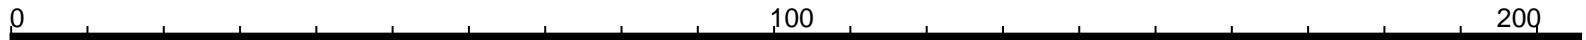

KBases BAC

Gaps in BAC

AC203720.2

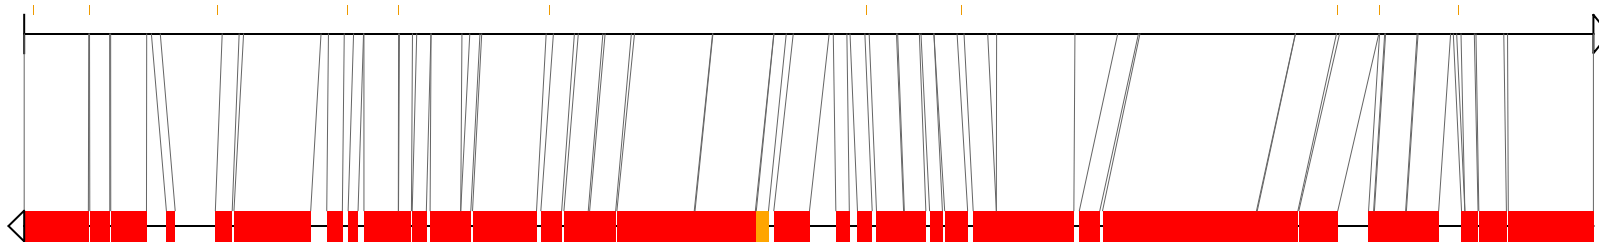

NLE12

51046793

50839309

Rpts  
Gaps

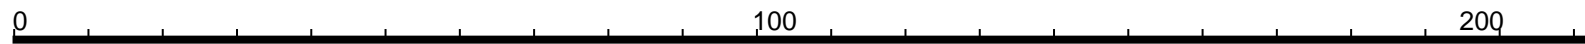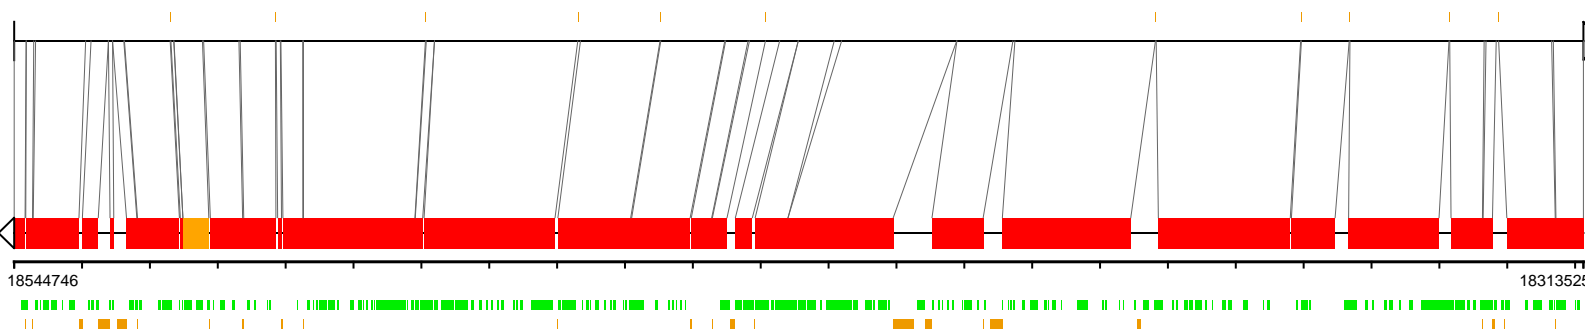

Kbases BAC  
Gaps in BAC  
AC203721.2

NLE15

Rpts  
Gaps

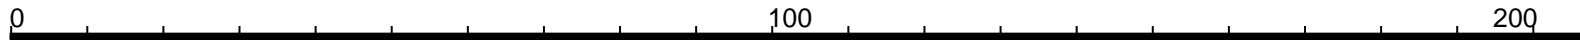

Kbases BAC

Gaps in BAC

AC203722.3

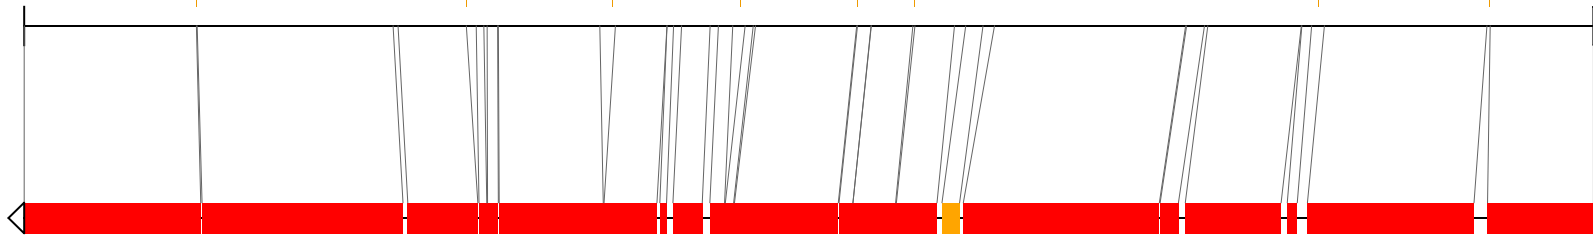

NLE7

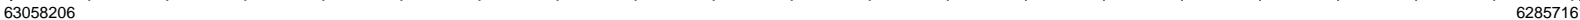

Rpts  
Gaps

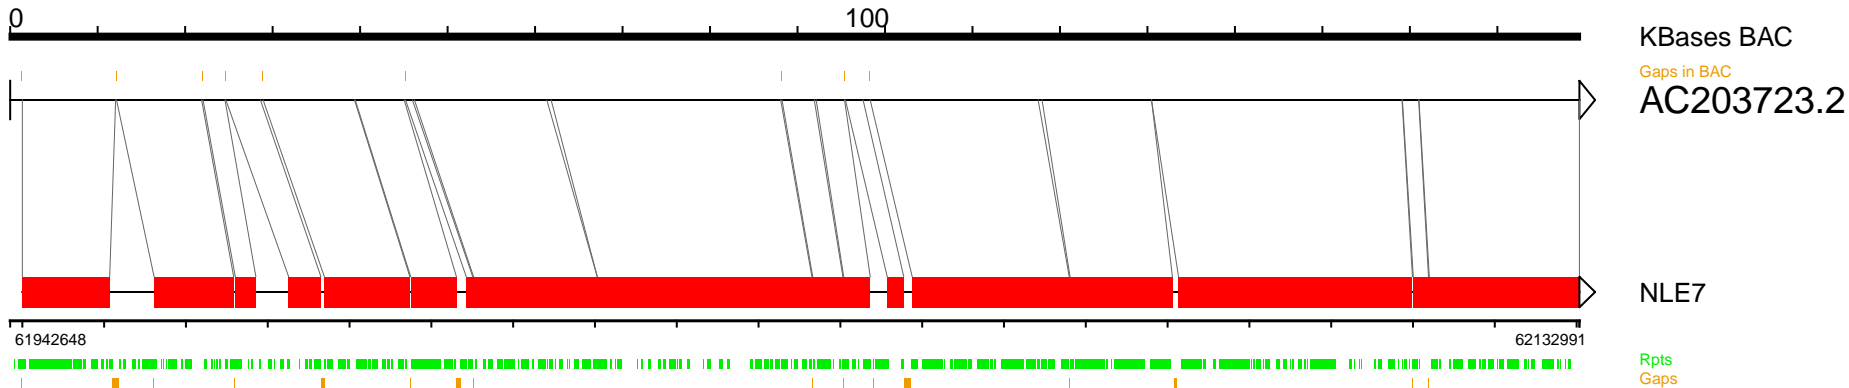



Kbases BAC

Gaps in BAC

AC203724.2



NLE8

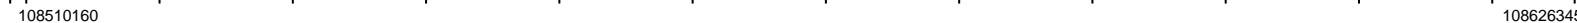

Rpts  
Gaps

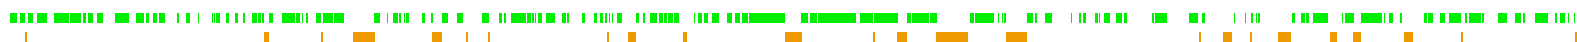

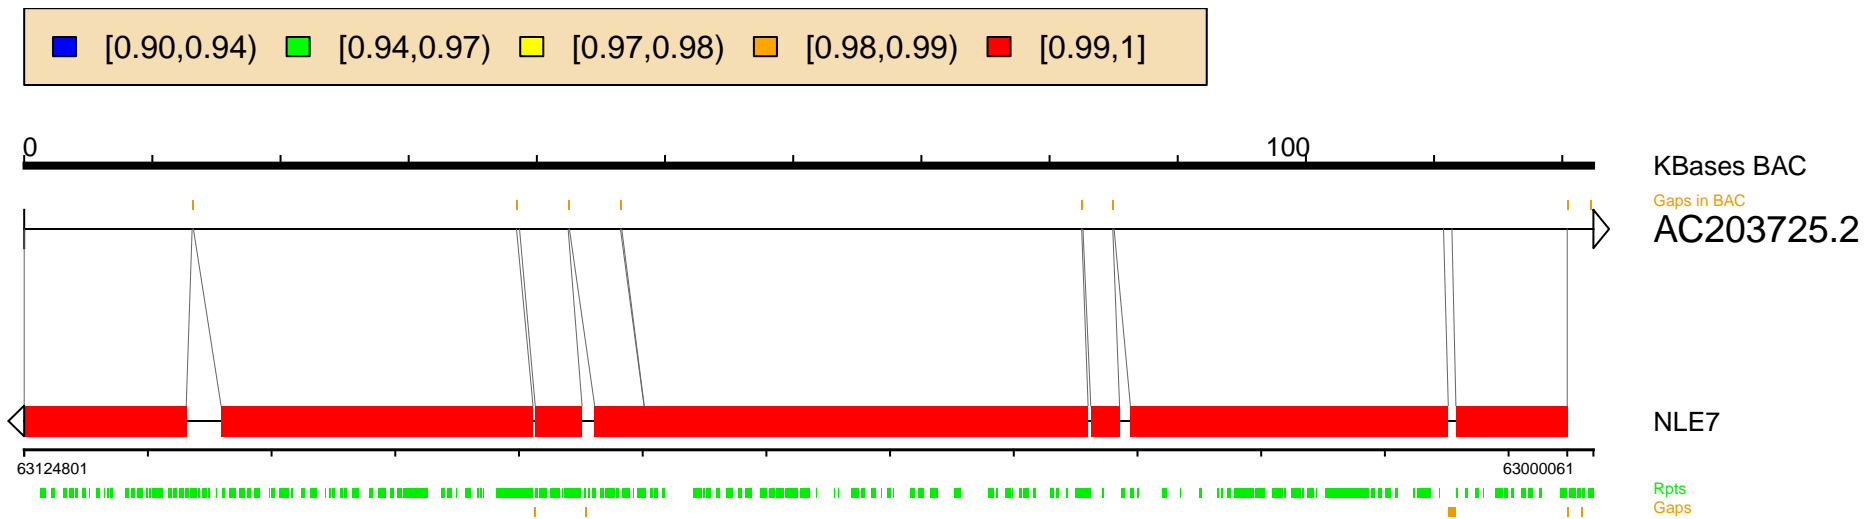

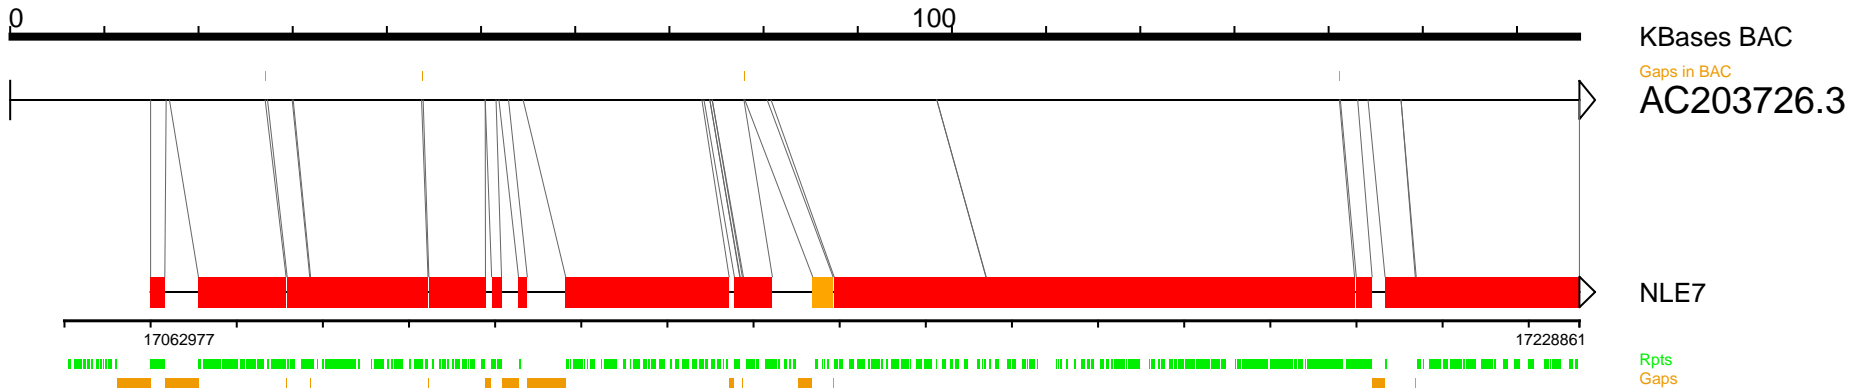

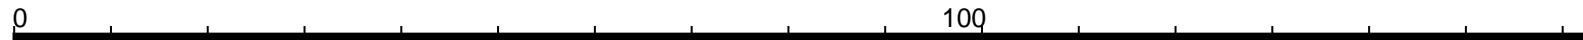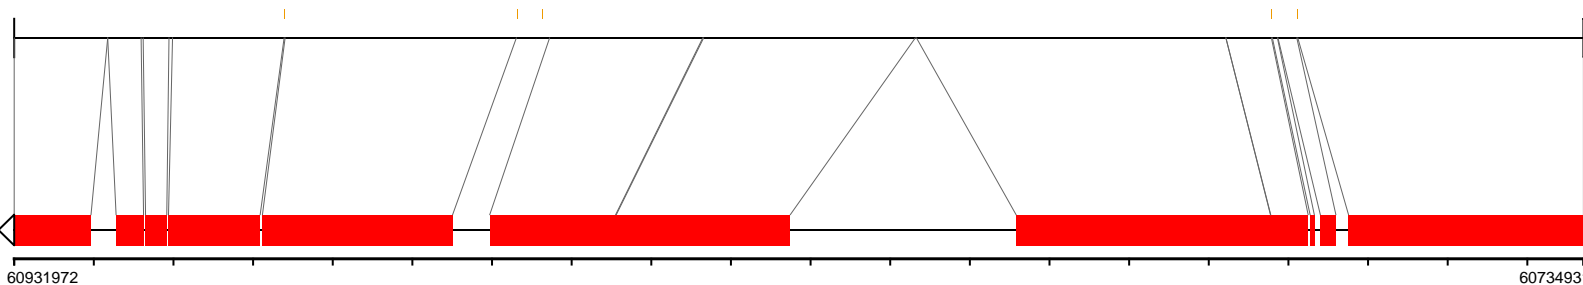

KBases BAC  
AC204179.2

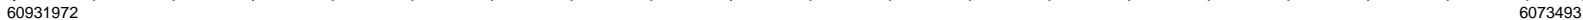

Rpts  
Gaps

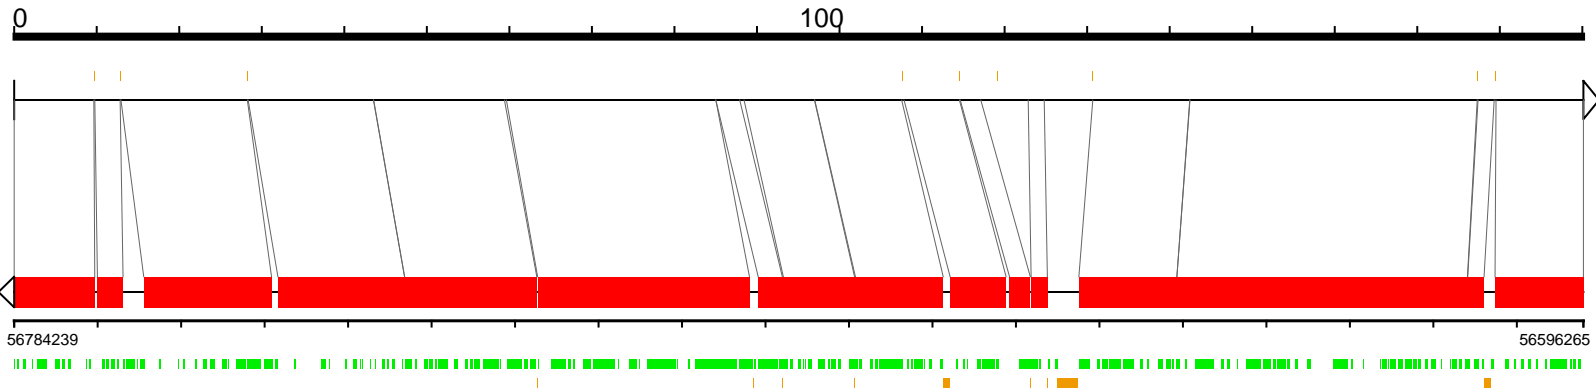

Kbases BAC  
Gaps in BAC  
AC204180.2

NLE6

Rpts  
Gaps

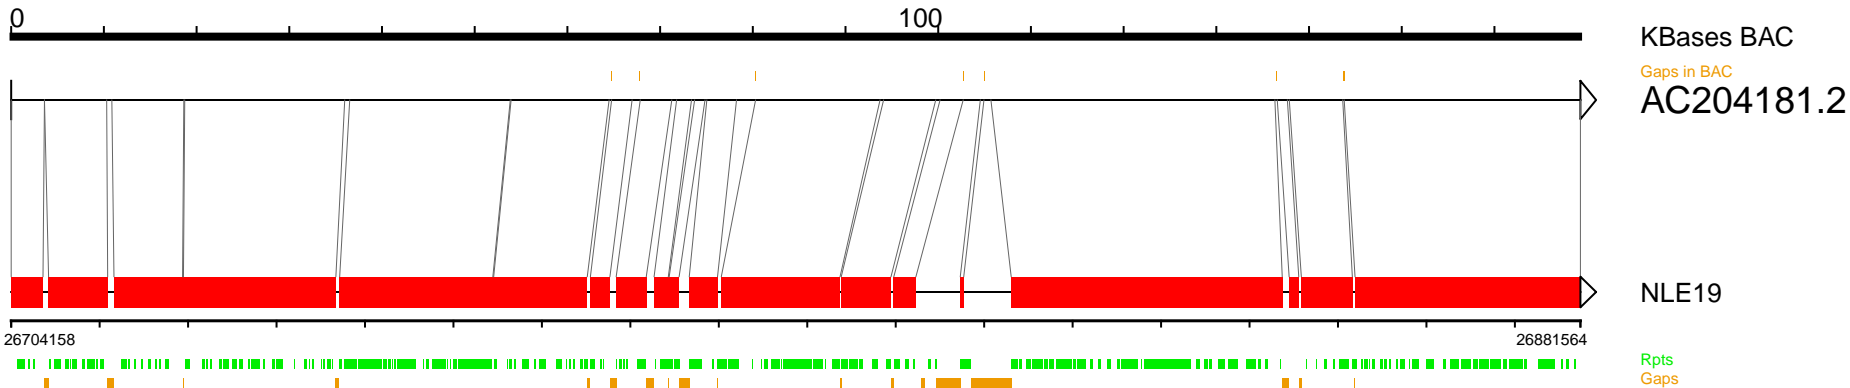

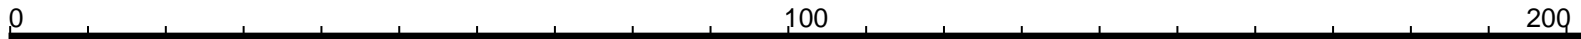

Kbases BAC  
AC204182.2

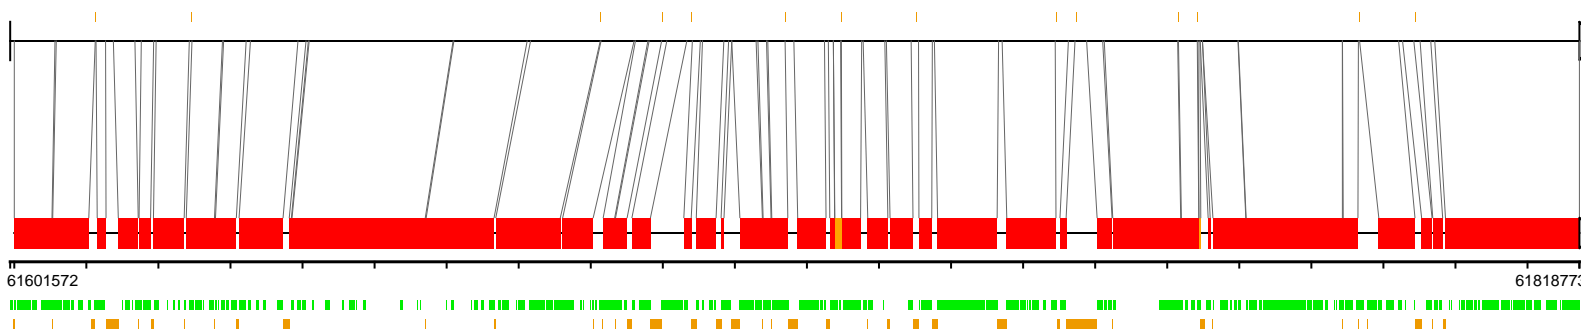

NLE7

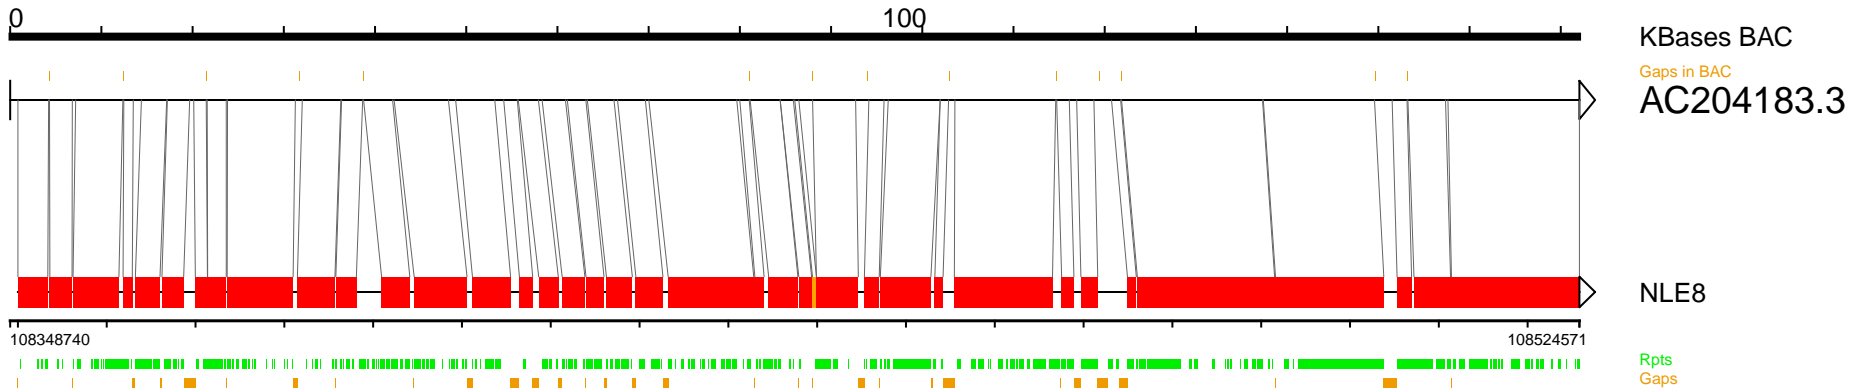

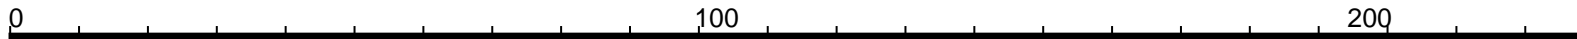

Kbases BAC

Gaps in BAC

AC204184.2

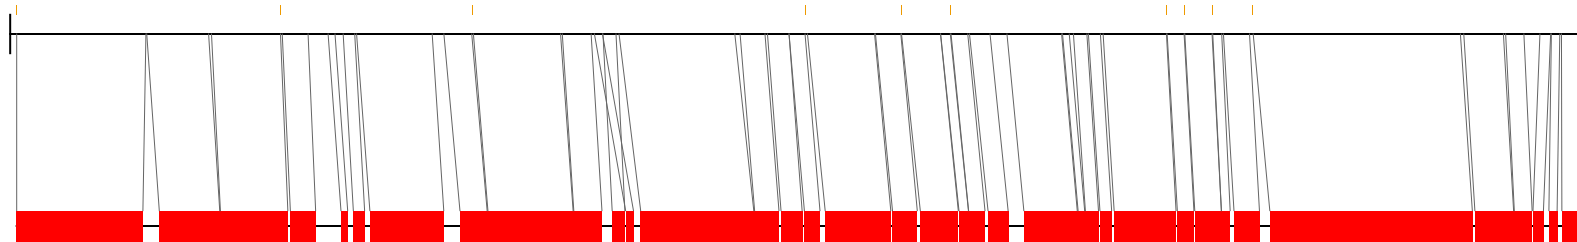

NLE8

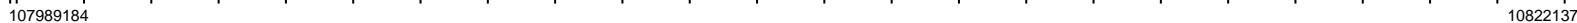

Rpts  
Gaps

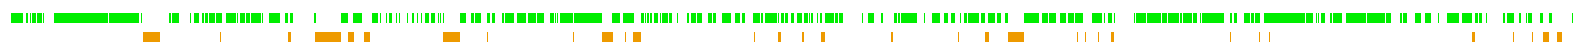

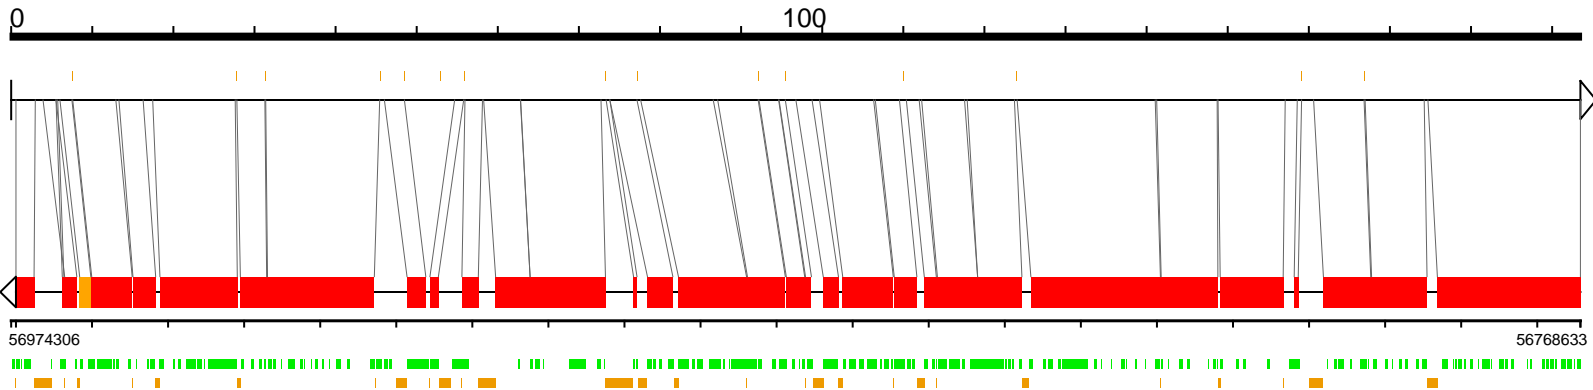

Kbases BAC  
Gaps in BAC  
AC204185.2

NLE6

Rpts  
Gaps

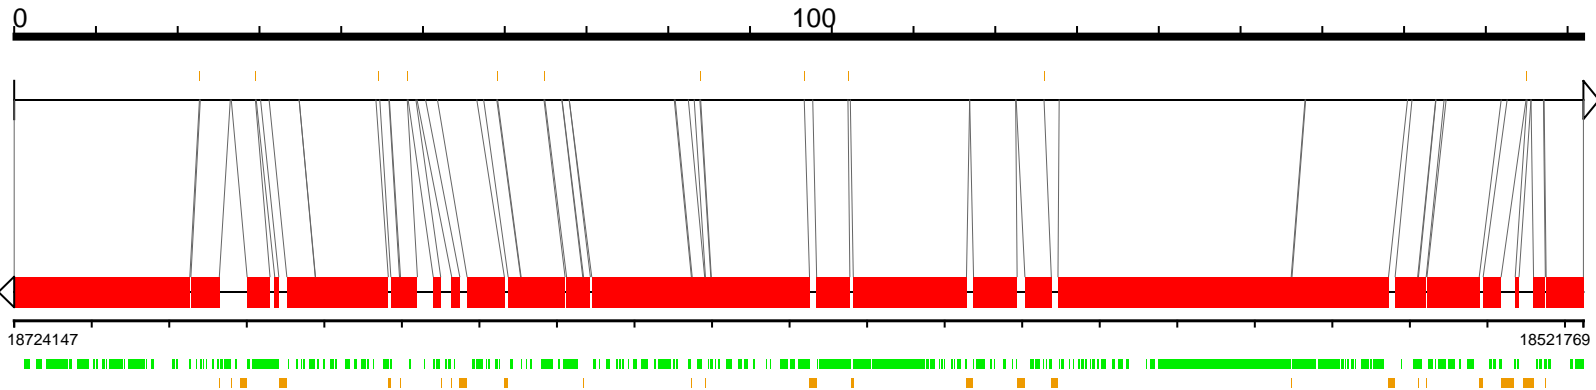

KBases BAC  
AC204186.3

NLE15

Rpts  
Gaps

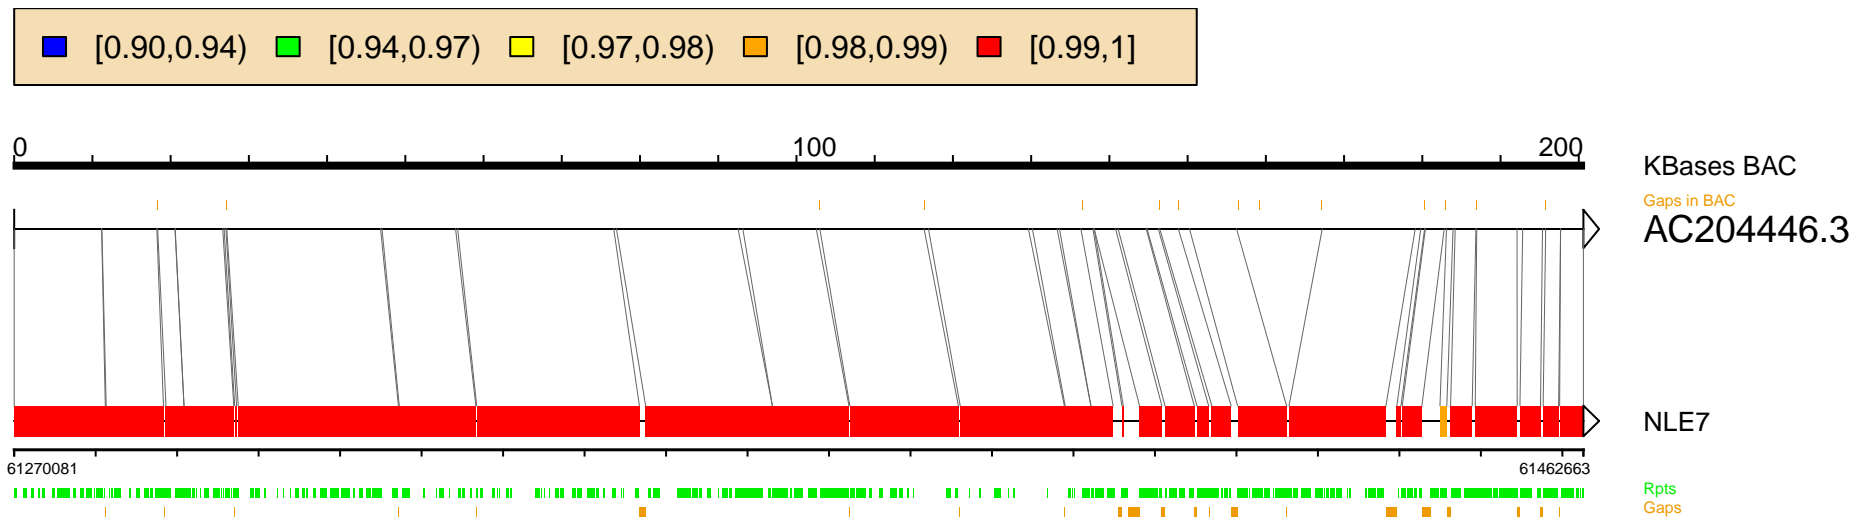

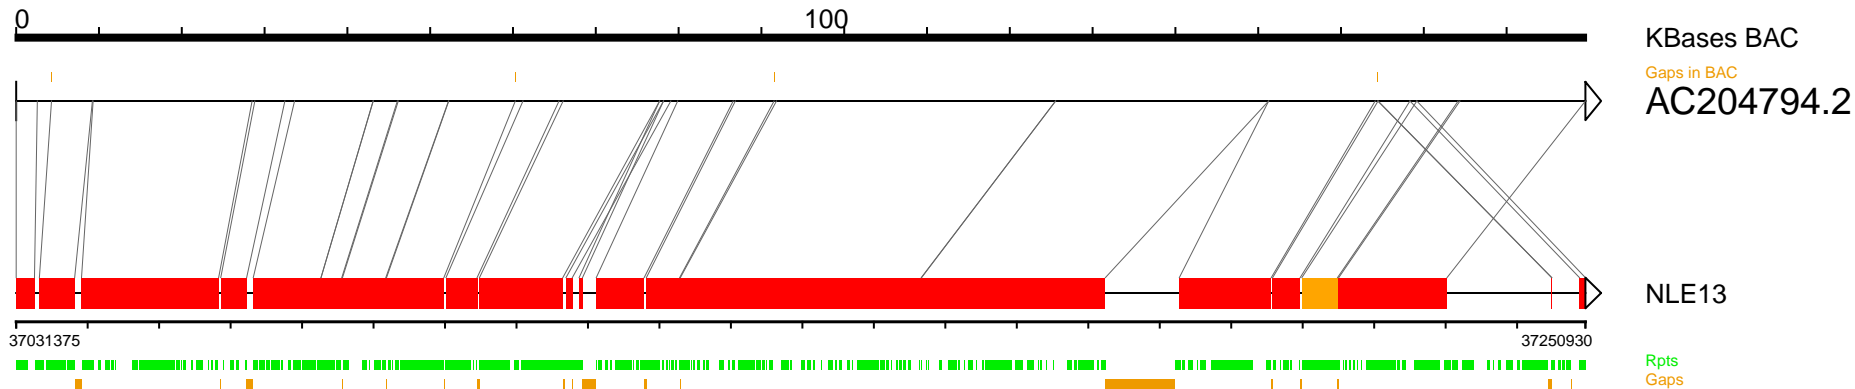

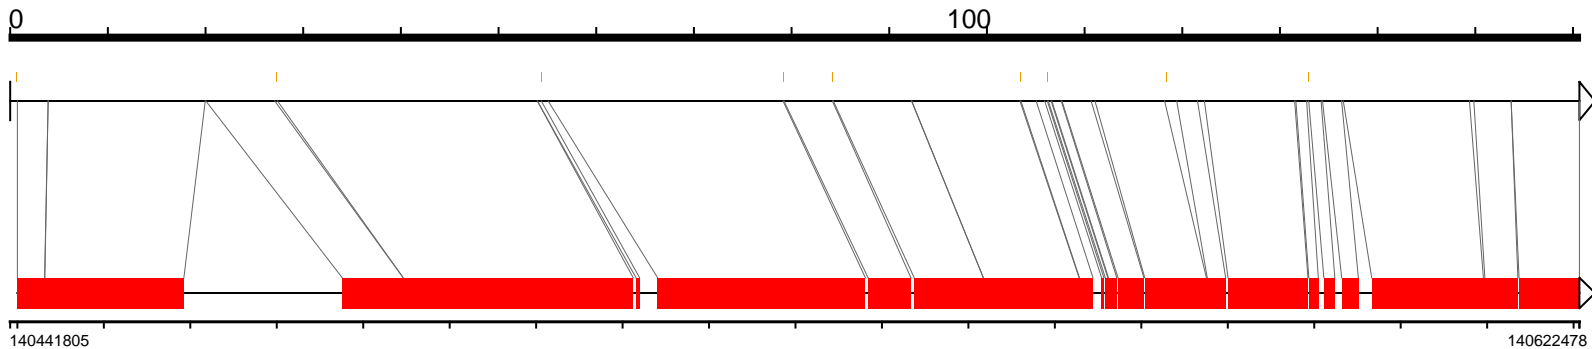

KBases BAC

Gaps in BAC

AC204795.2

NLEX

Rpts

Gaps

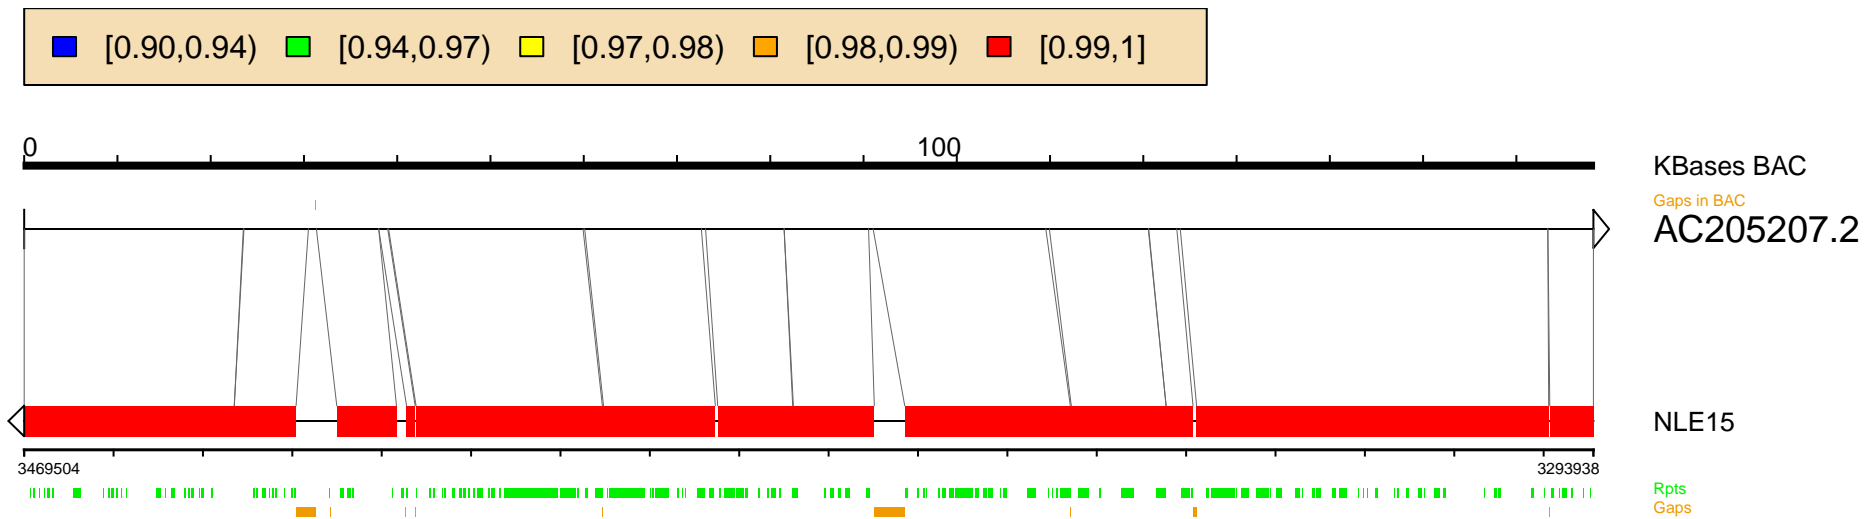

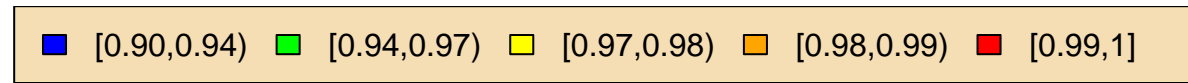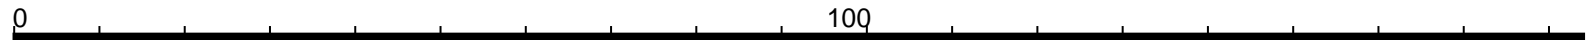

Kbases BAC

Gaps in BAC

AC205208.3

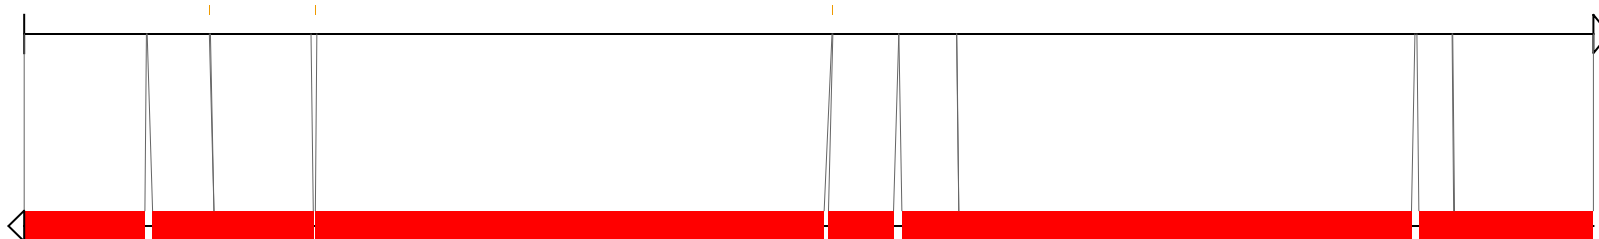

NLE2

61246179

61059890

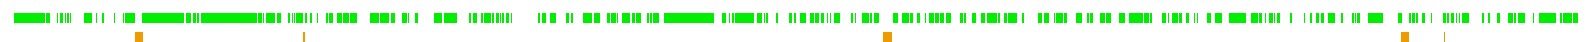

Rpts  
Gaps

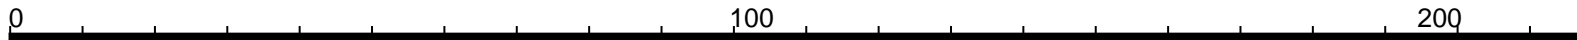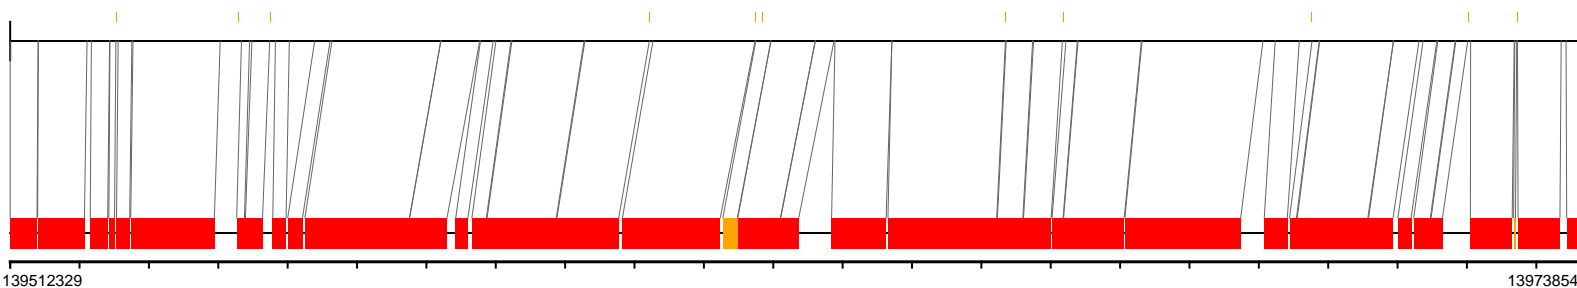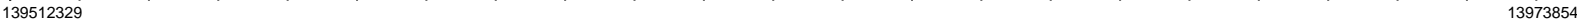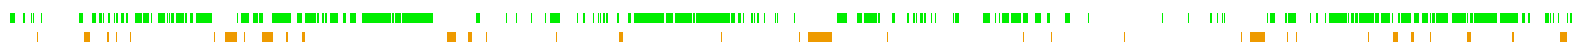

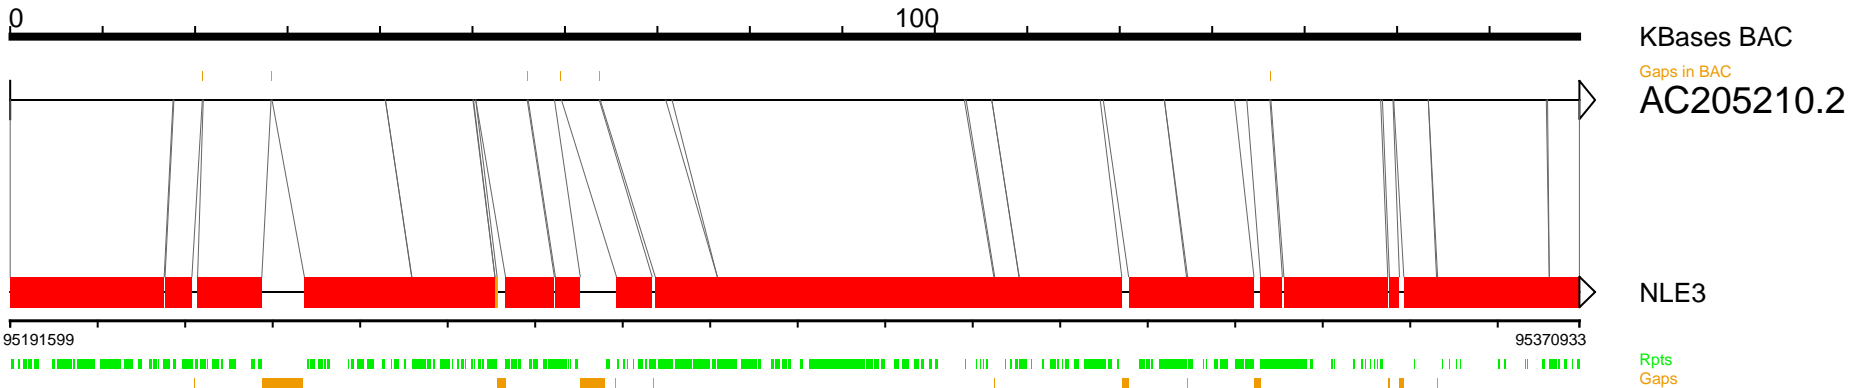

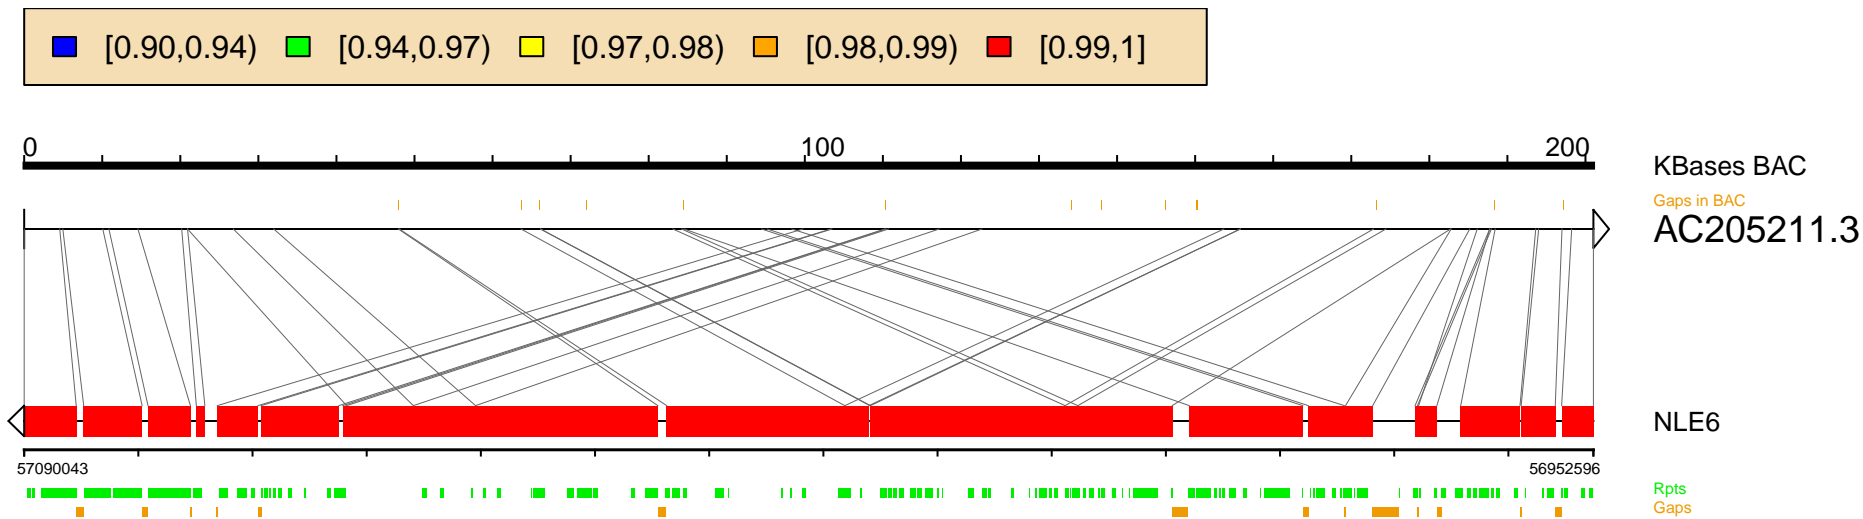

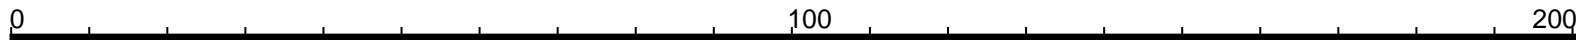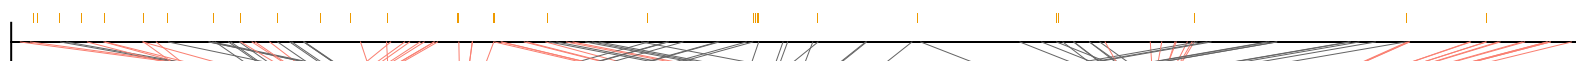

KBases BAC

AC205212.1

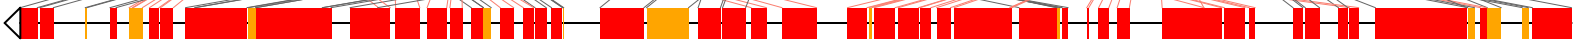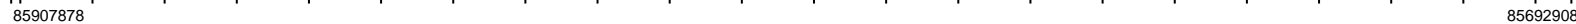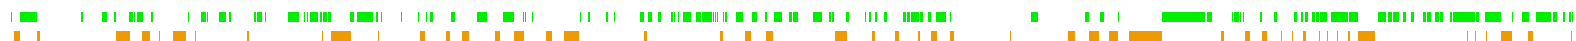

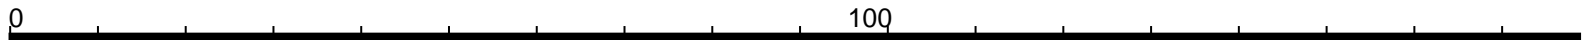

KBases BAC  
AC205438.3

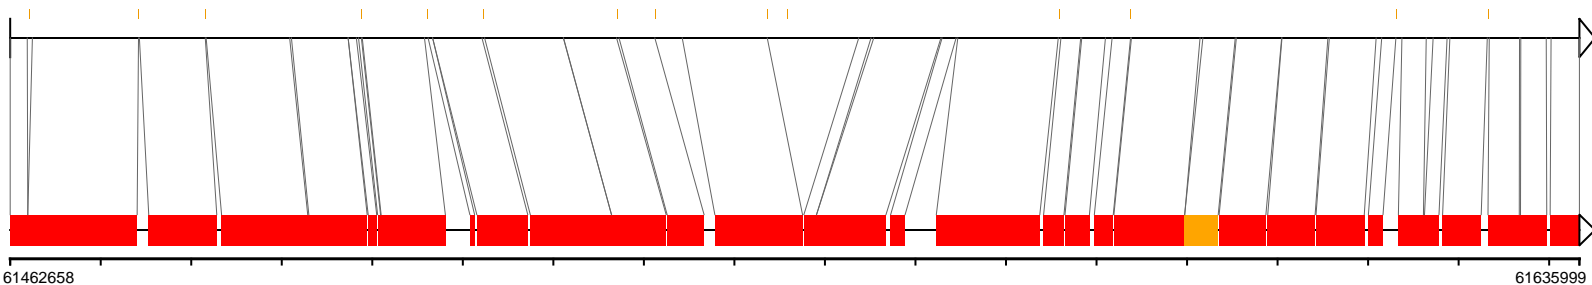

NLE7

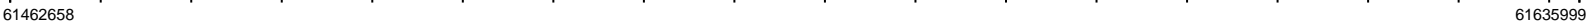

Rpts  
Gaps

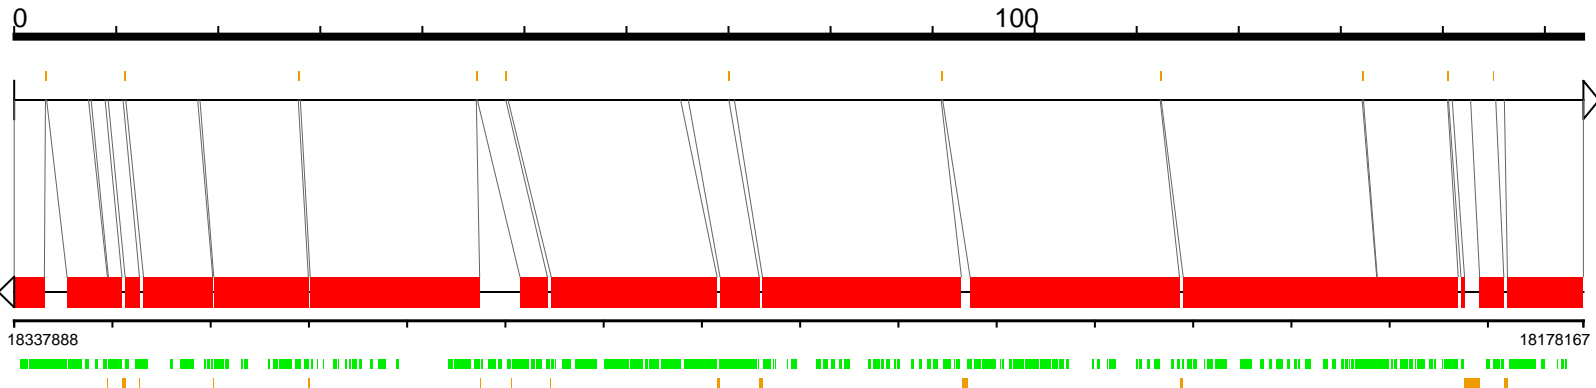

Kbases BAC  
Gaps in BAC  
AC205439.2

NLE15

Rpts  
Gaps

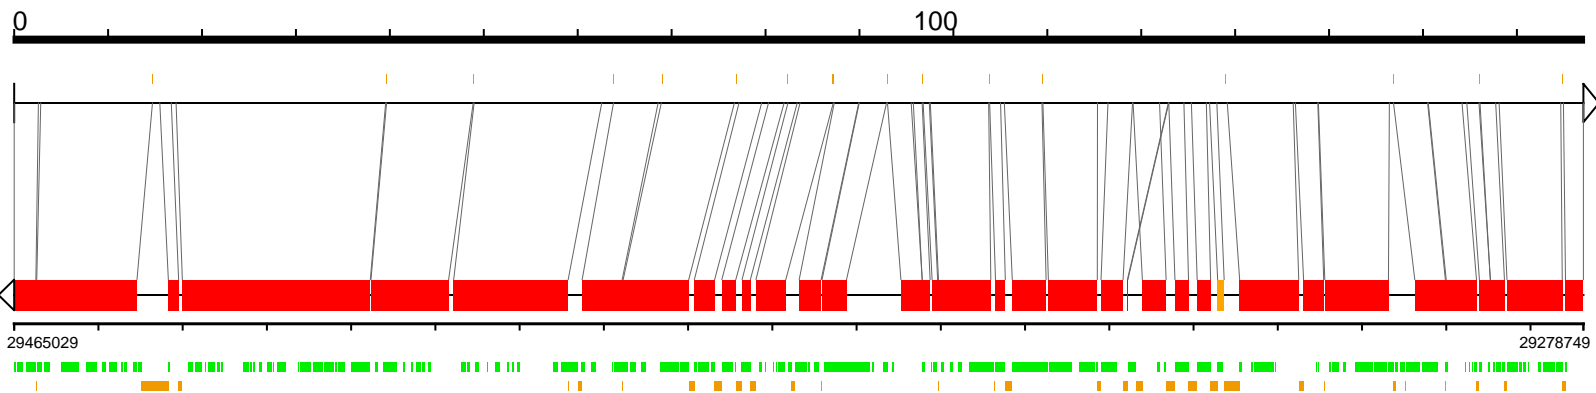

Kbases BAC  
Gaps in BAC  
**AC205440.2**  
NLE13  
Rpts  
Gaps

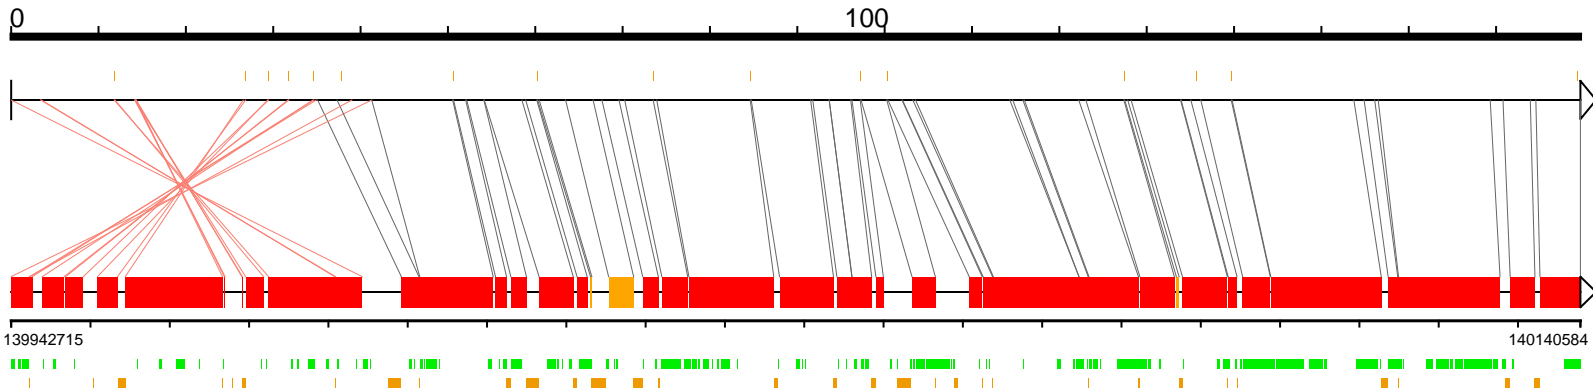

Kbases BAC  
Gaps in BAC  
AC205441.3

NLEX

Rpts  
Gaps

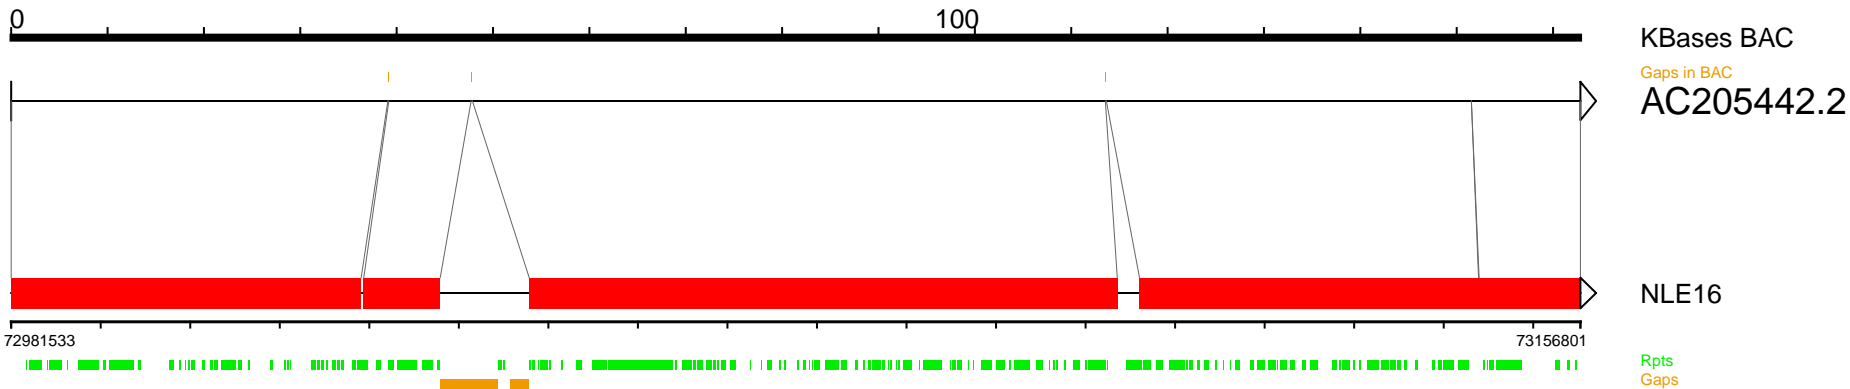

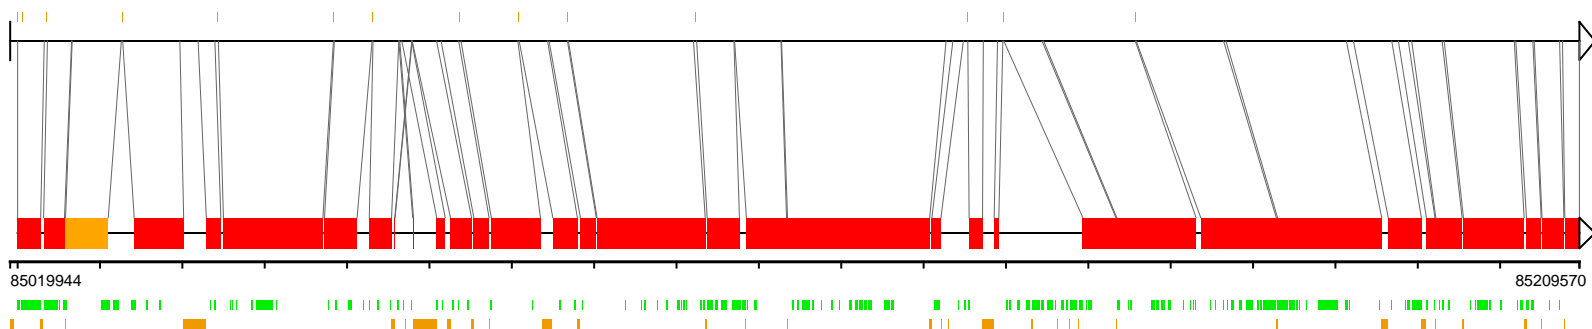

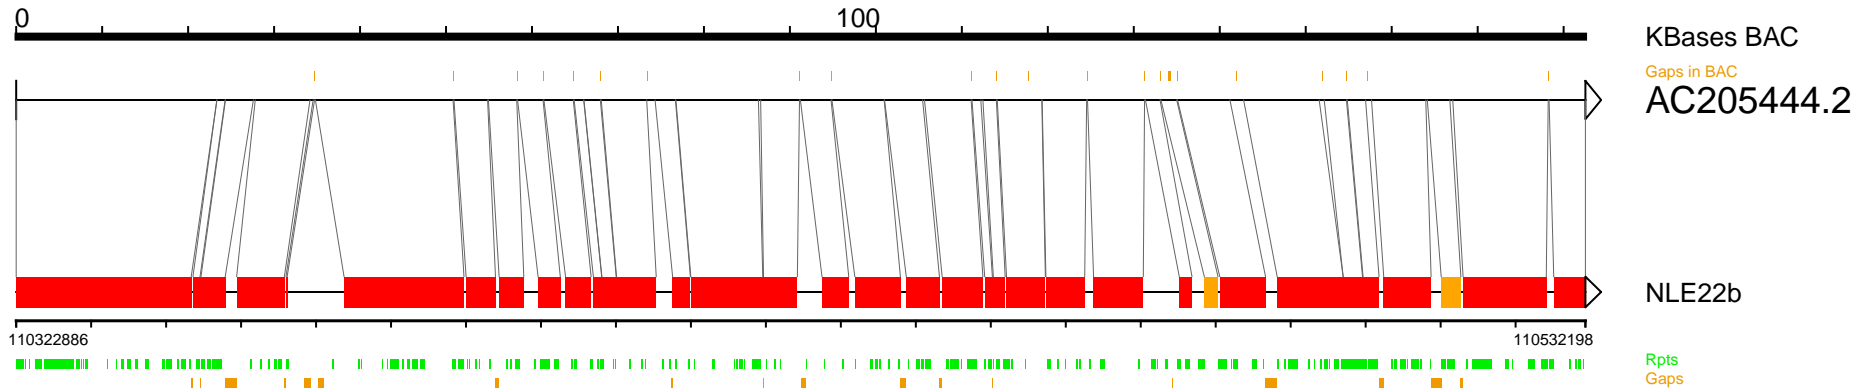

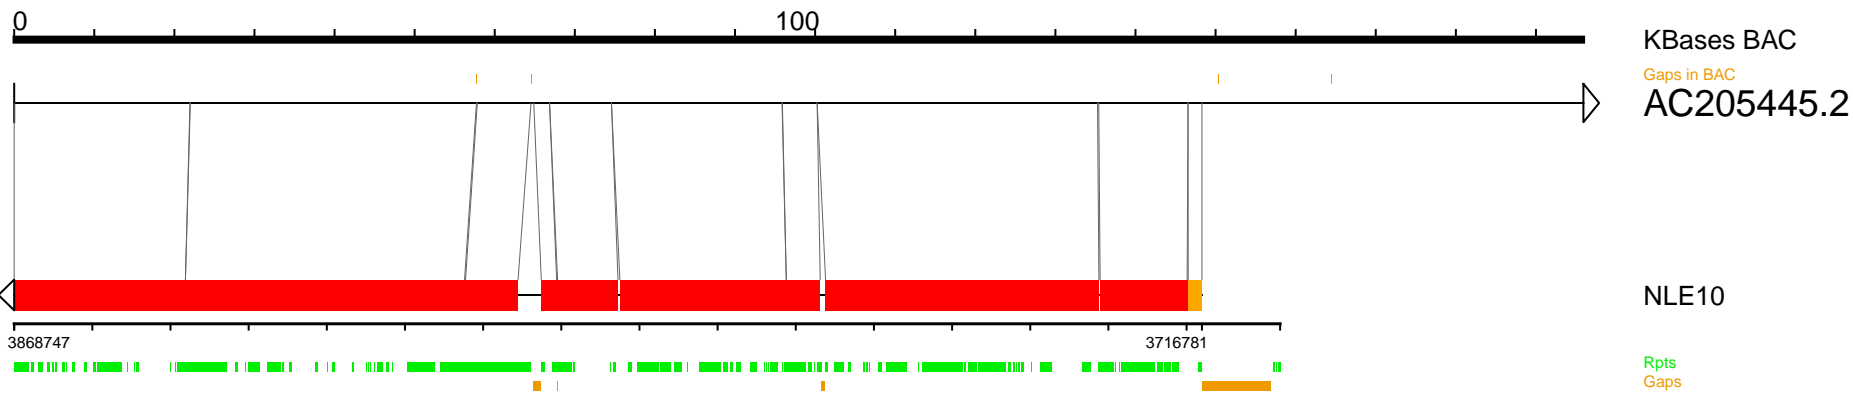

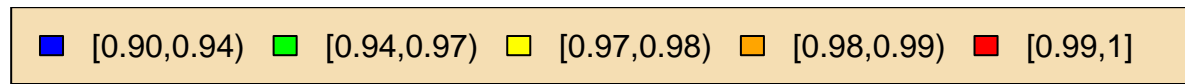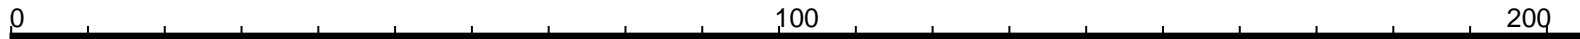

Kbases BAC

Gaps in BAC

AC205446.2

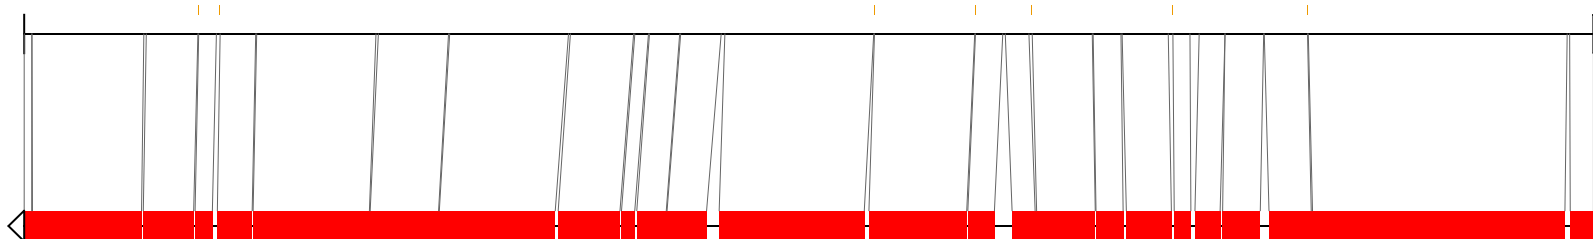

NLE22b

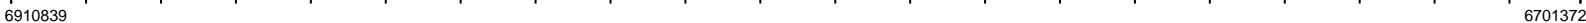

Rpts  
Gaps

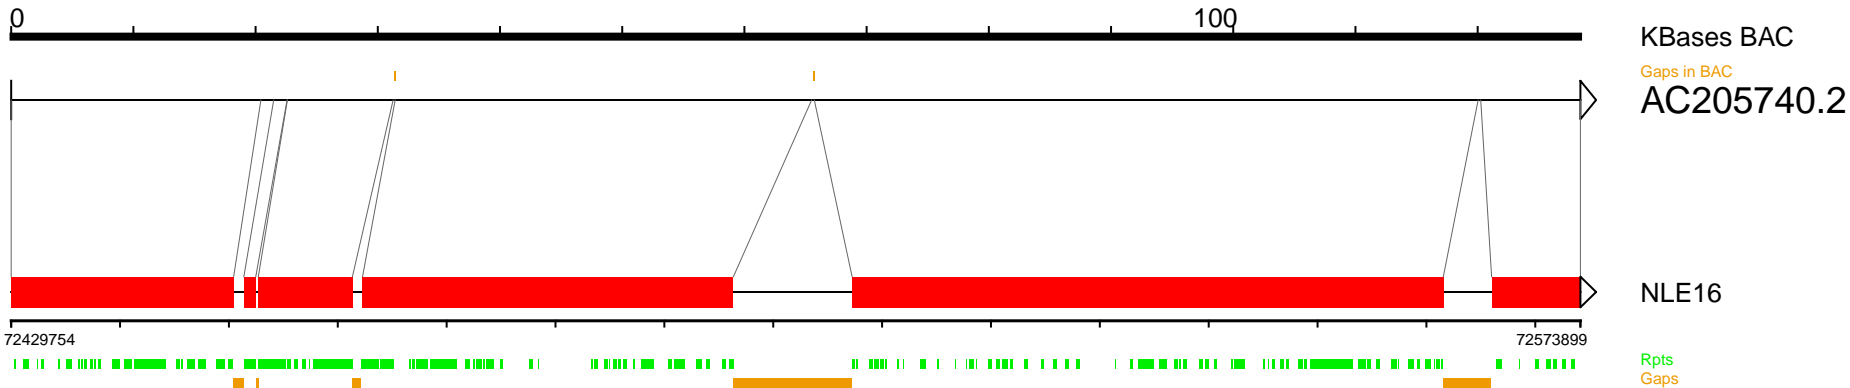

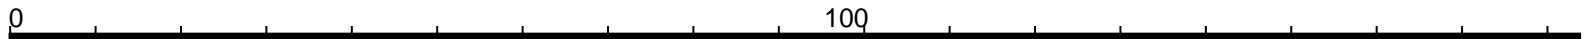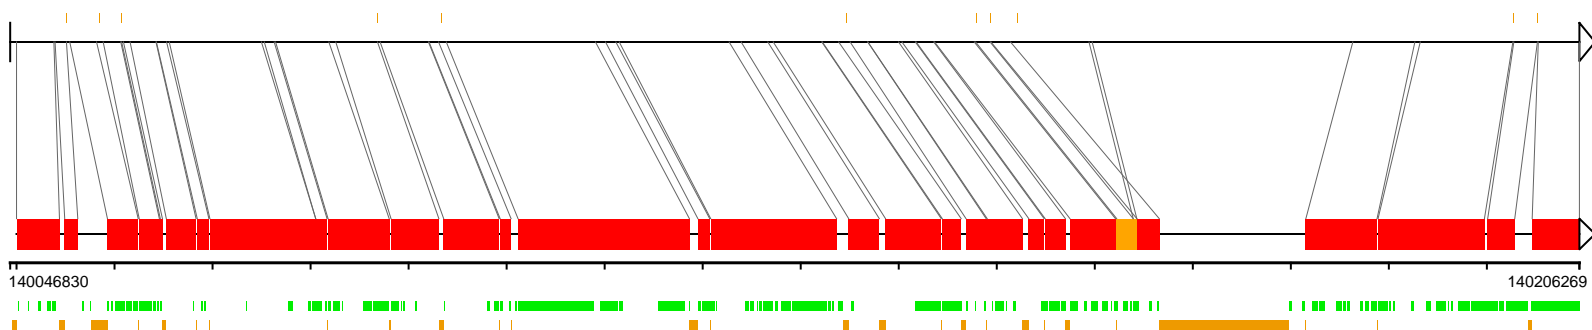

Kbases BAC  
Gaps in BAC  
AC205741.3

NLEX

Rpts  
Gaps

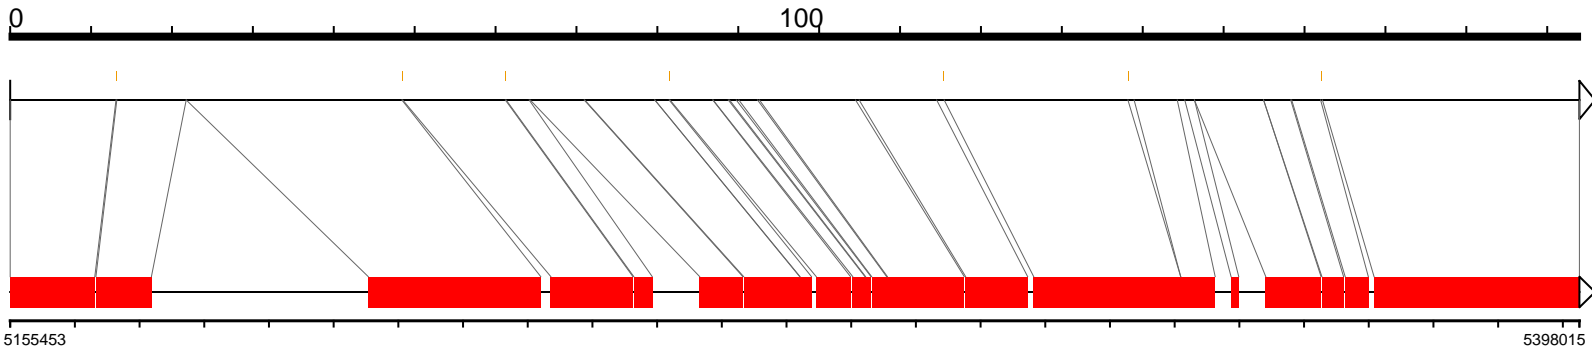

Kbases BAC

Gaps in BAC

AC205742.2

NLE17

Rpts

Gaps

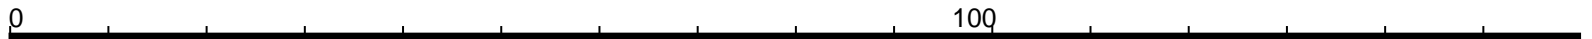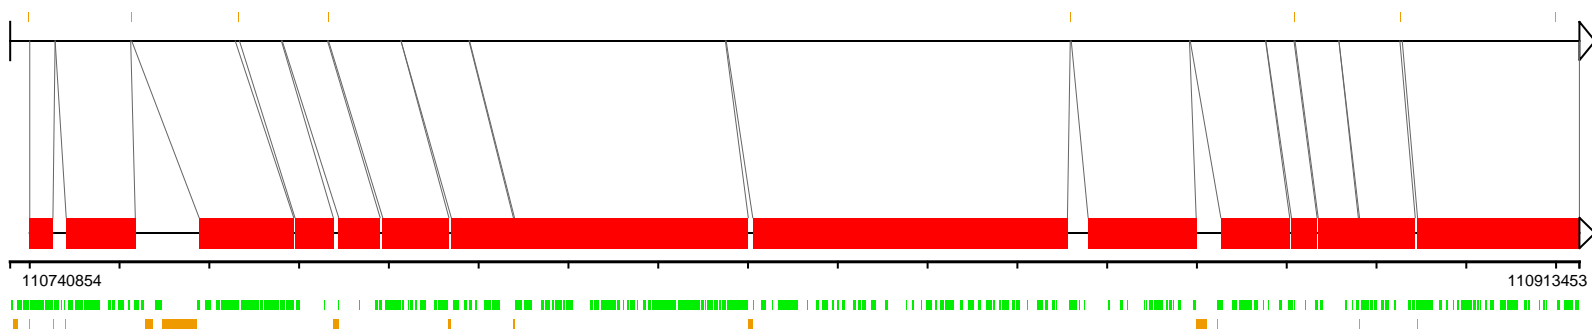

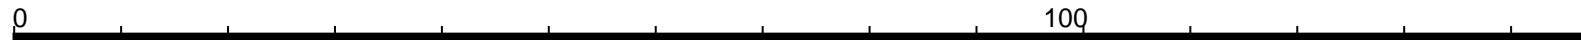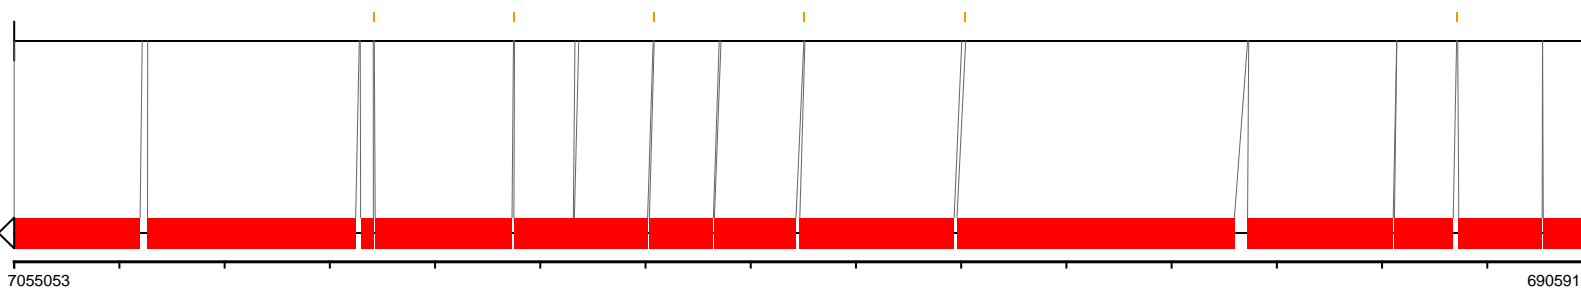

Kbases BAC  
Gaps in BAC  
AC205744.2

NLE22b

Rpts  
Gaps

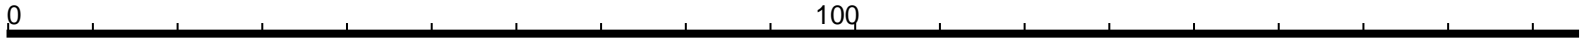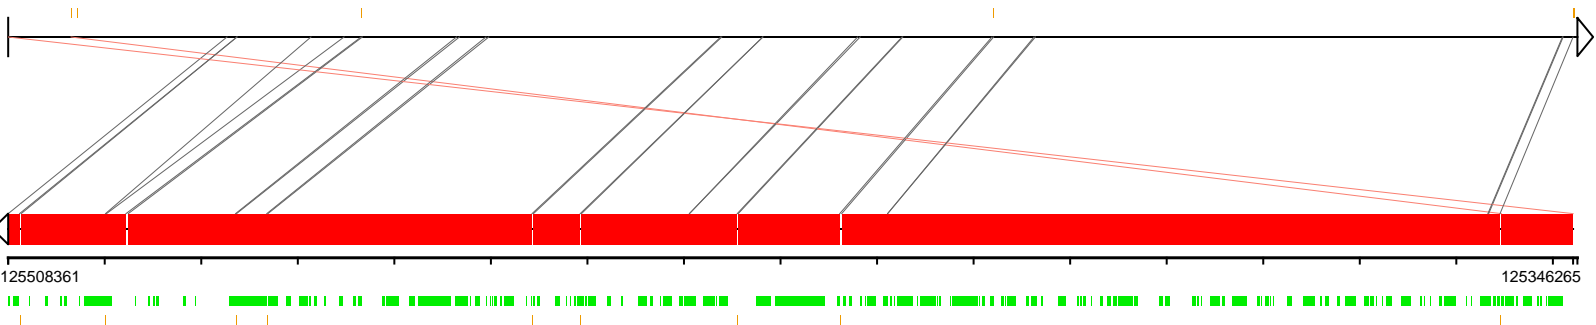

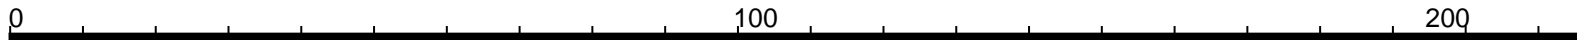

Kbases BAC

Gaps in BAC

AC205746.3

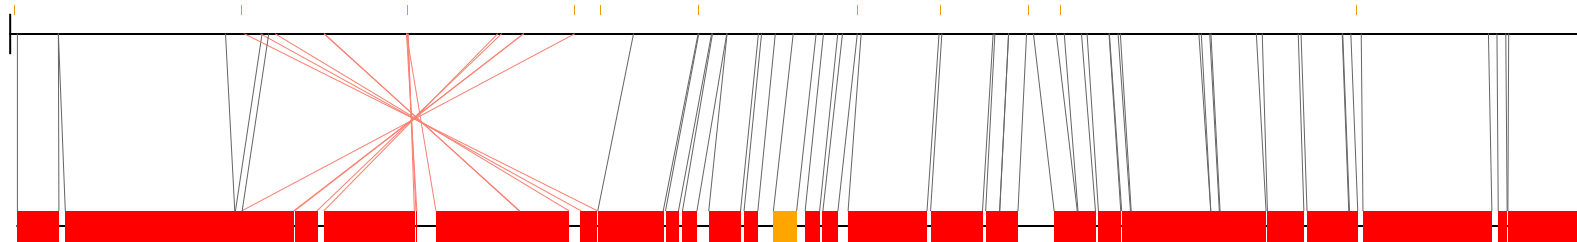

NLEX

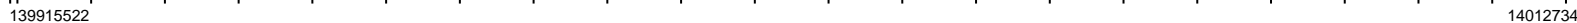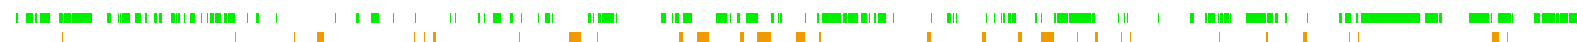

Rpts  
Gaps

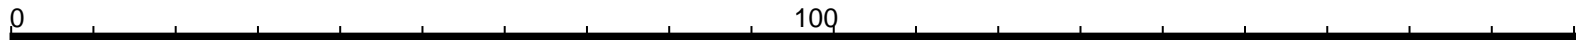

Kbases BAC

Gaps in BAC

AC205747.2

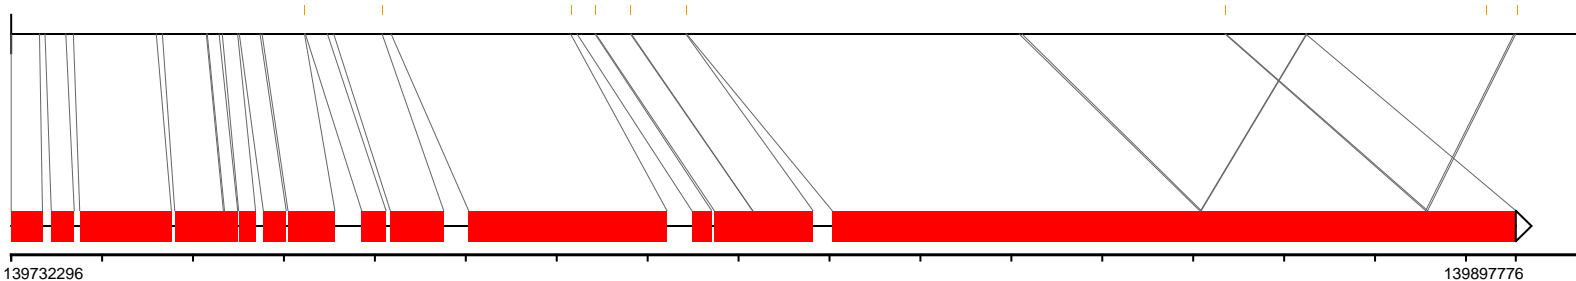

NLEX

139732296

139897776

Rpts  
Gaps

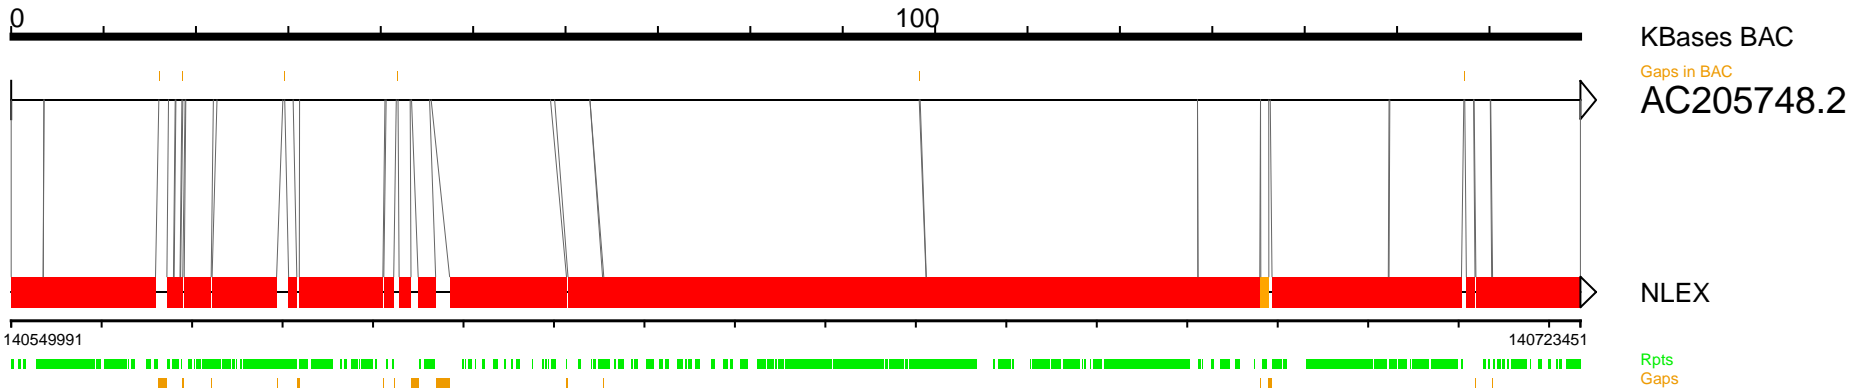

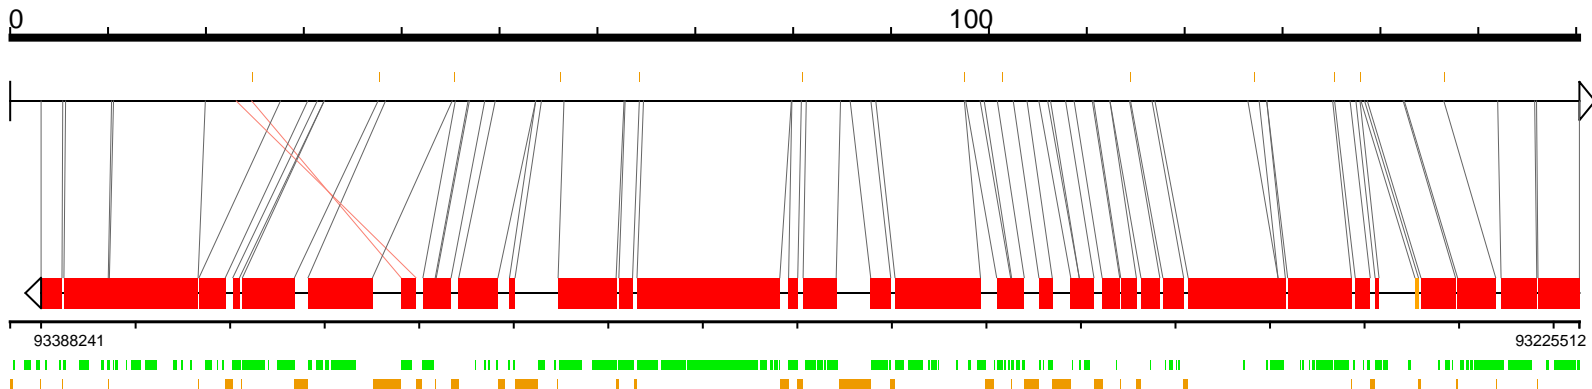

KBases BAC  
Gaps in BAC  
AC206072.3

NLE4

Rpts  
Gaps

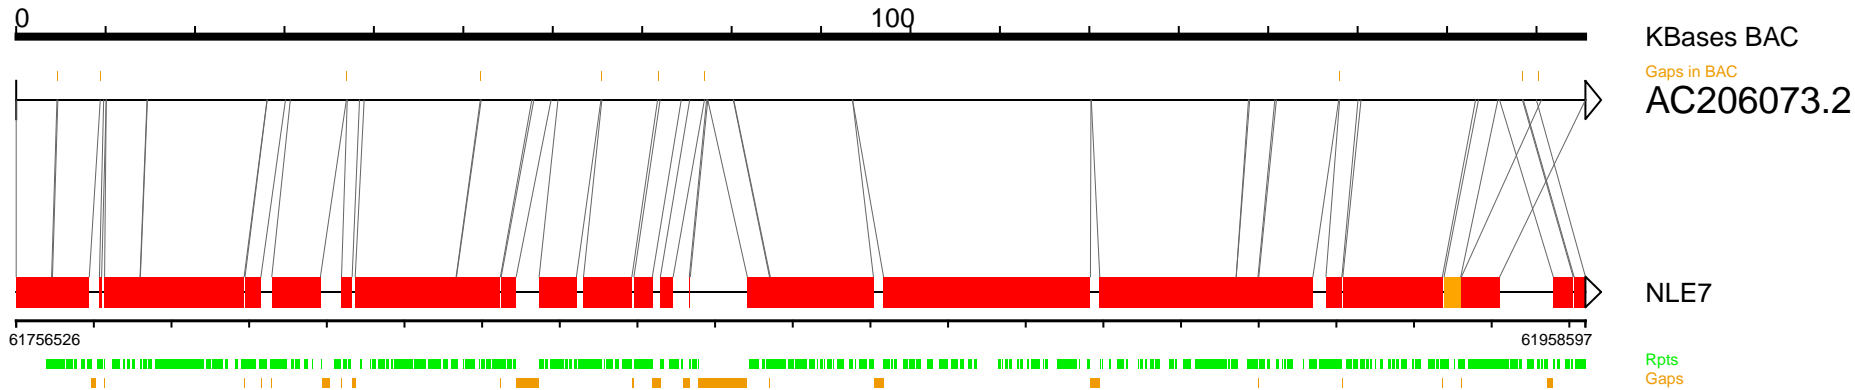

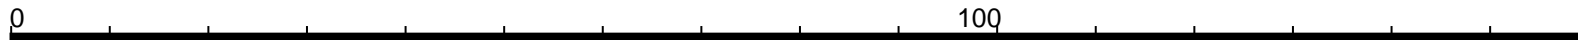

Kbases BAC

Gaps in BAC

AC206074.2

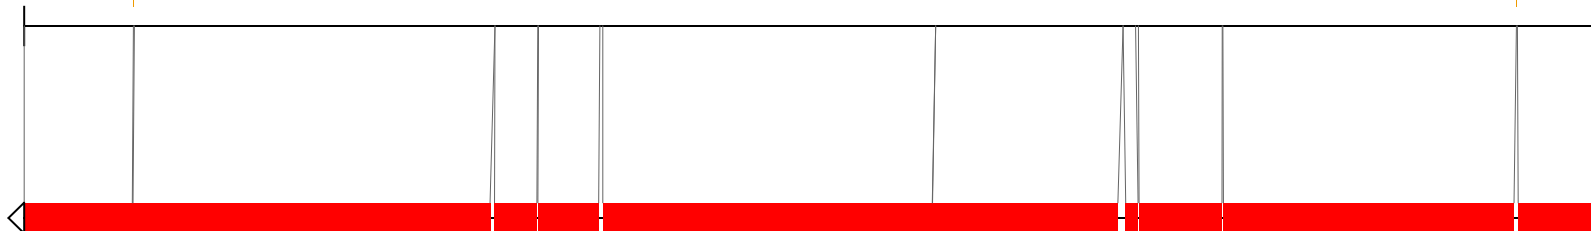

NLE15

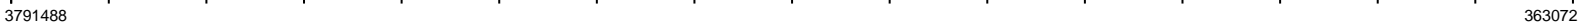

Rpts  
Gaps



Kbases BAC

Gaps in BAC

AC206075.2

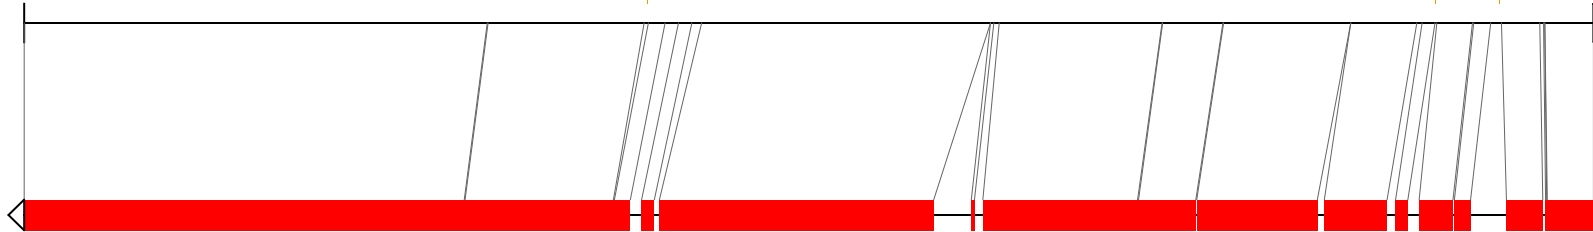

NLE2

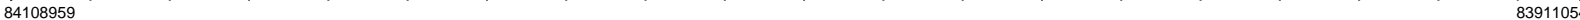

Rpts  
Gaps

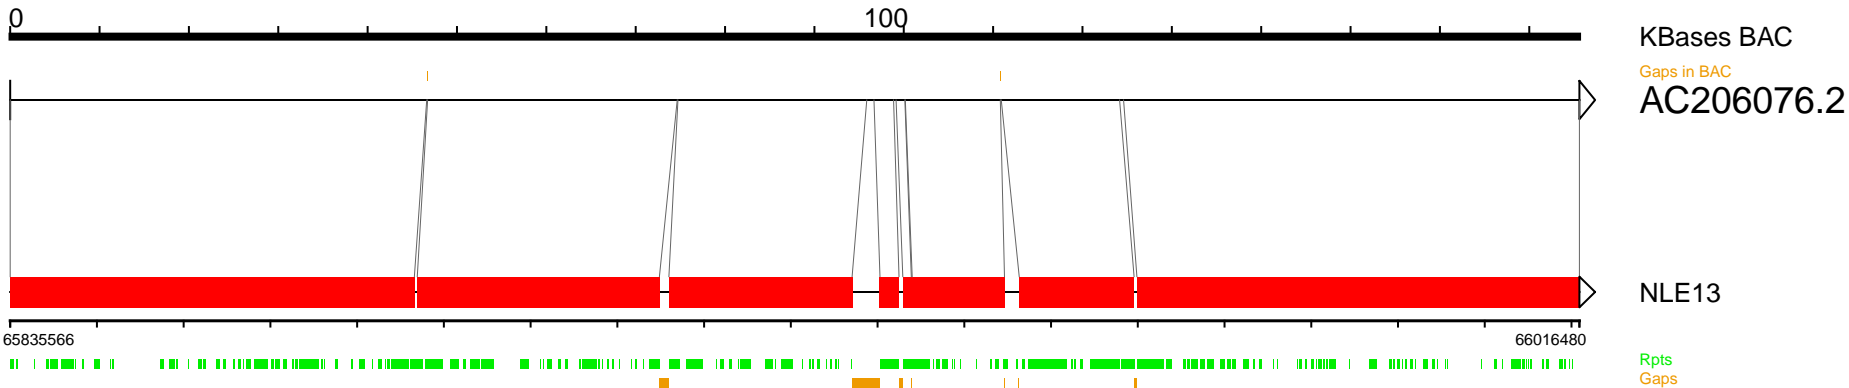

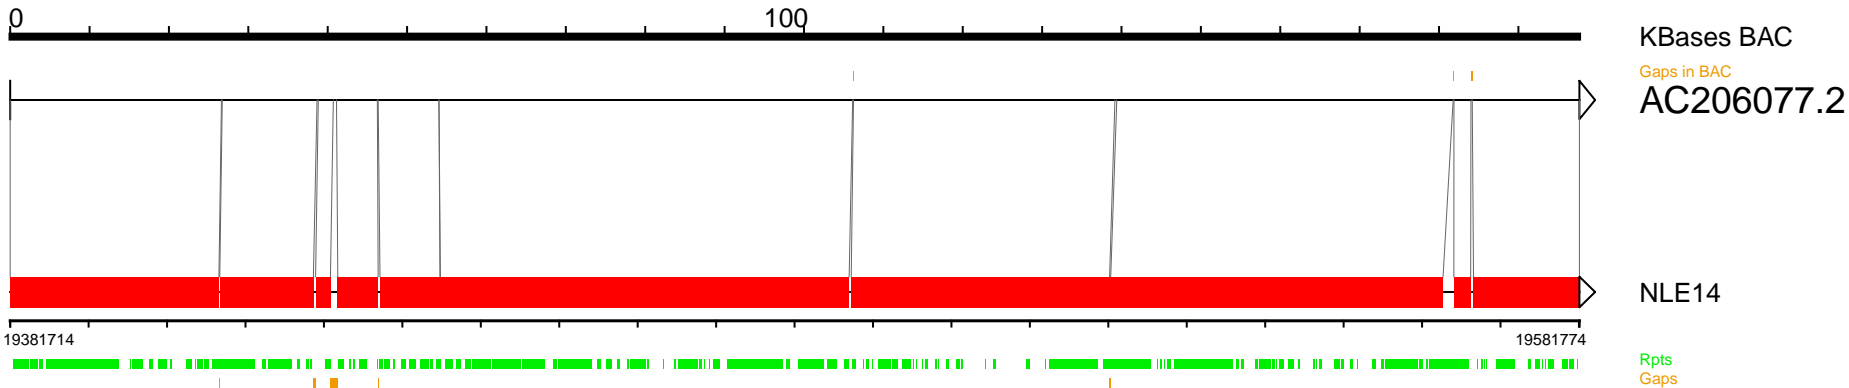

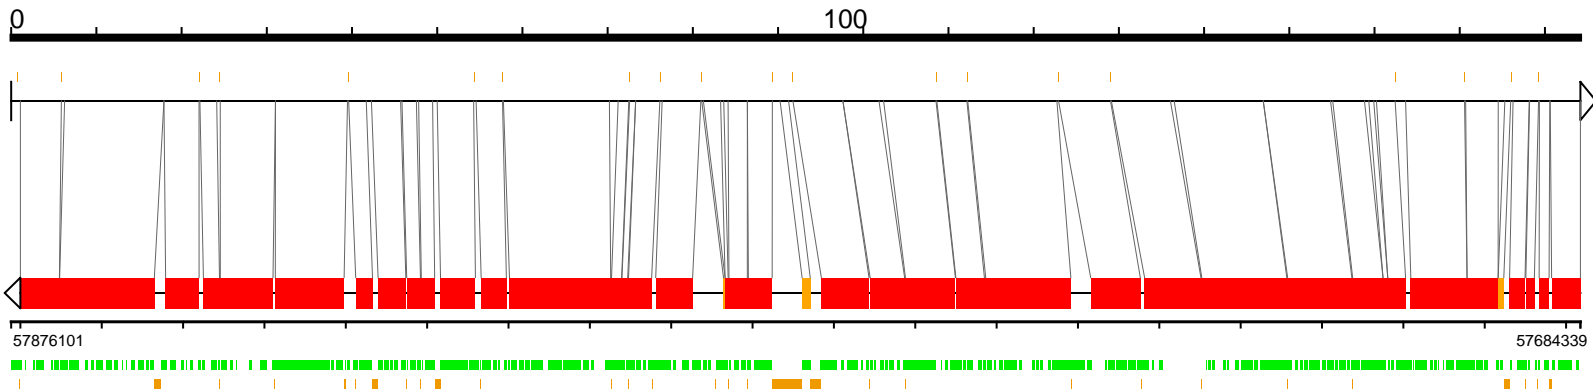

Kbases BAC  
Gaps in BAC  
AC206078.3

NLE3

Rpts  
Gaps

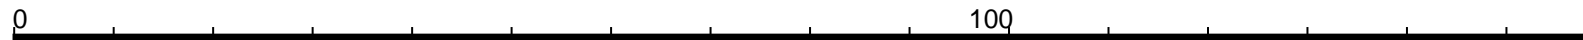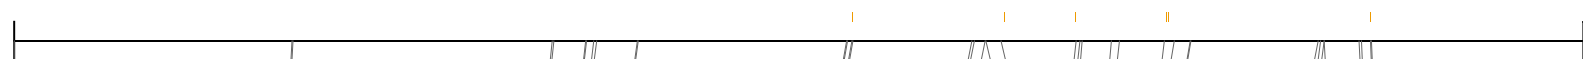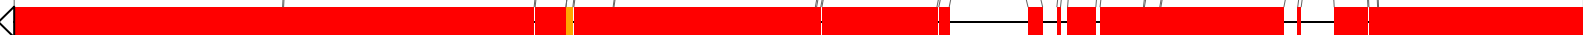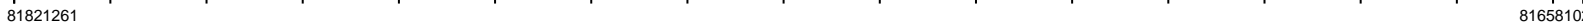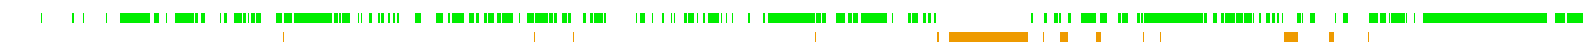

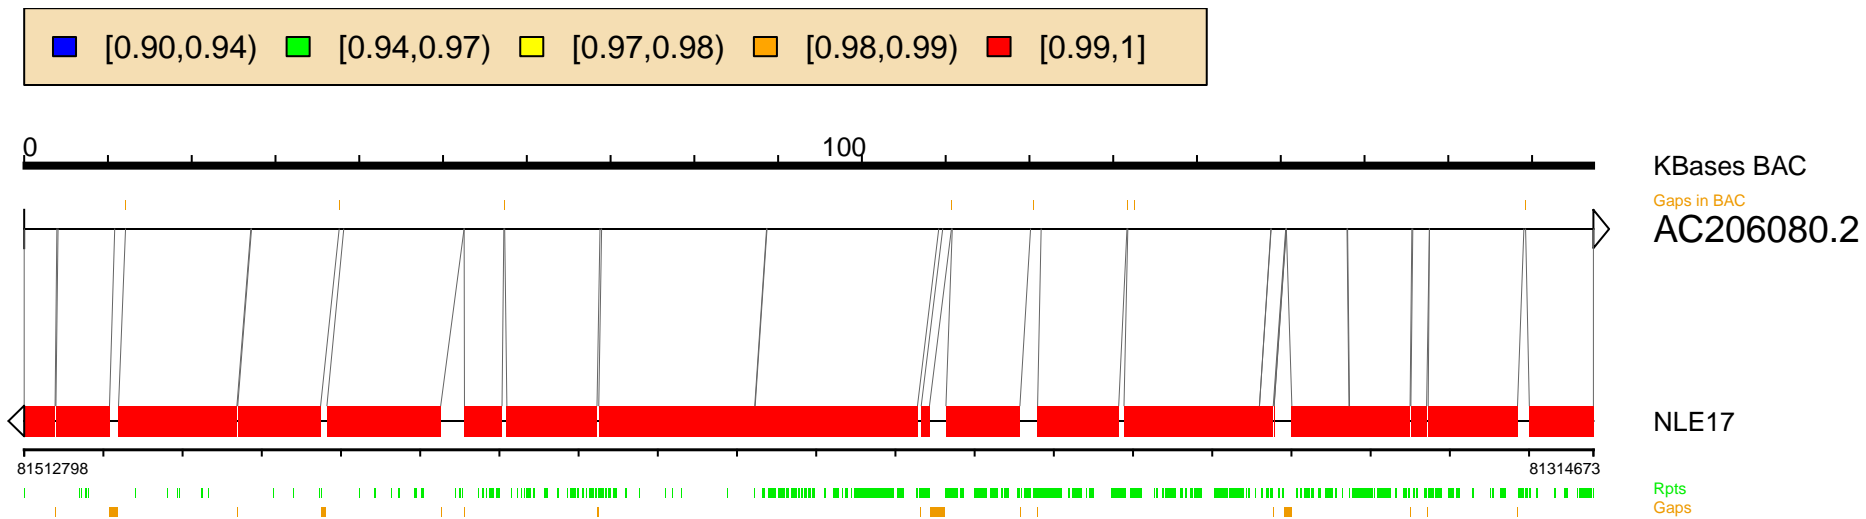

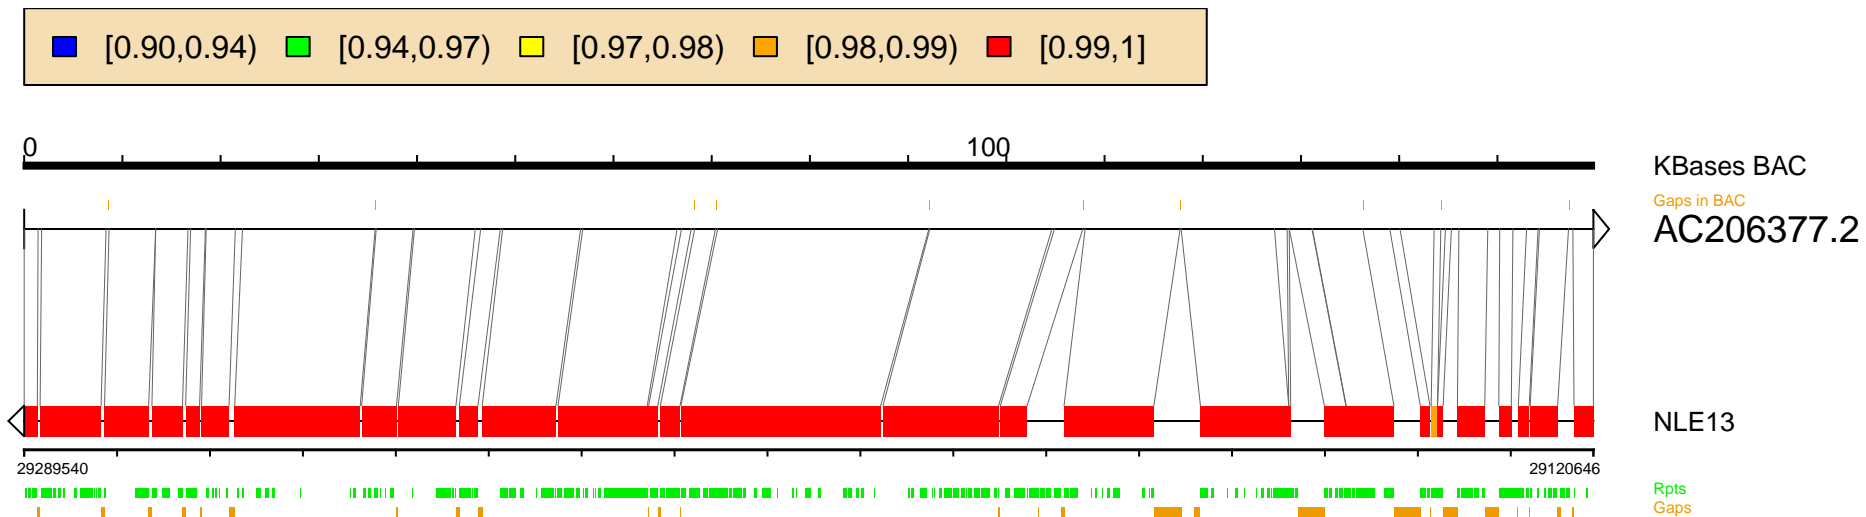

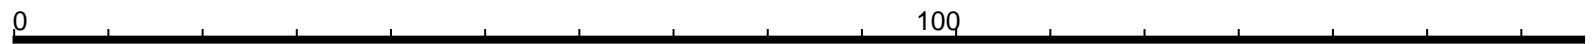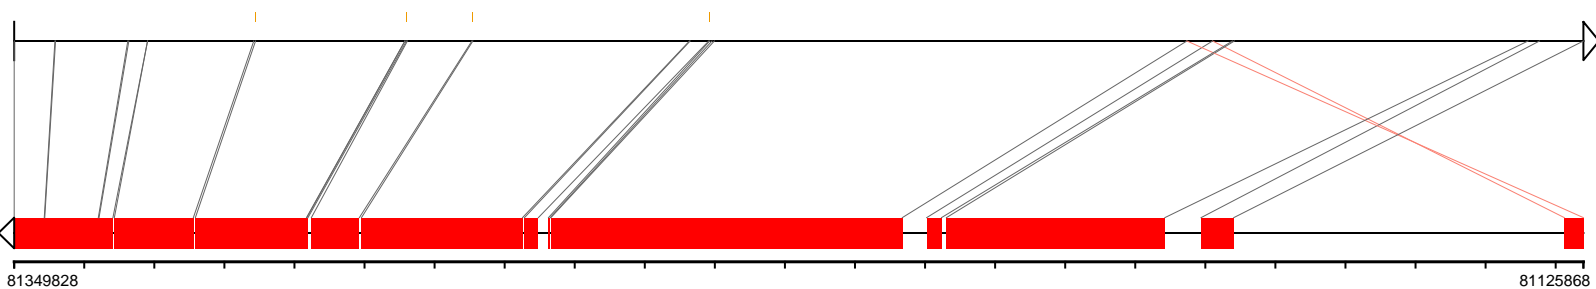

KBases BAC  
AC206378.2

NLE17

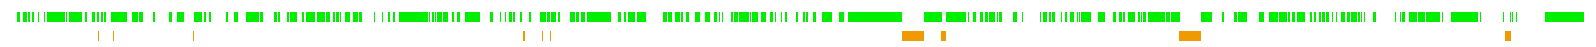

Rpts  
Gaps

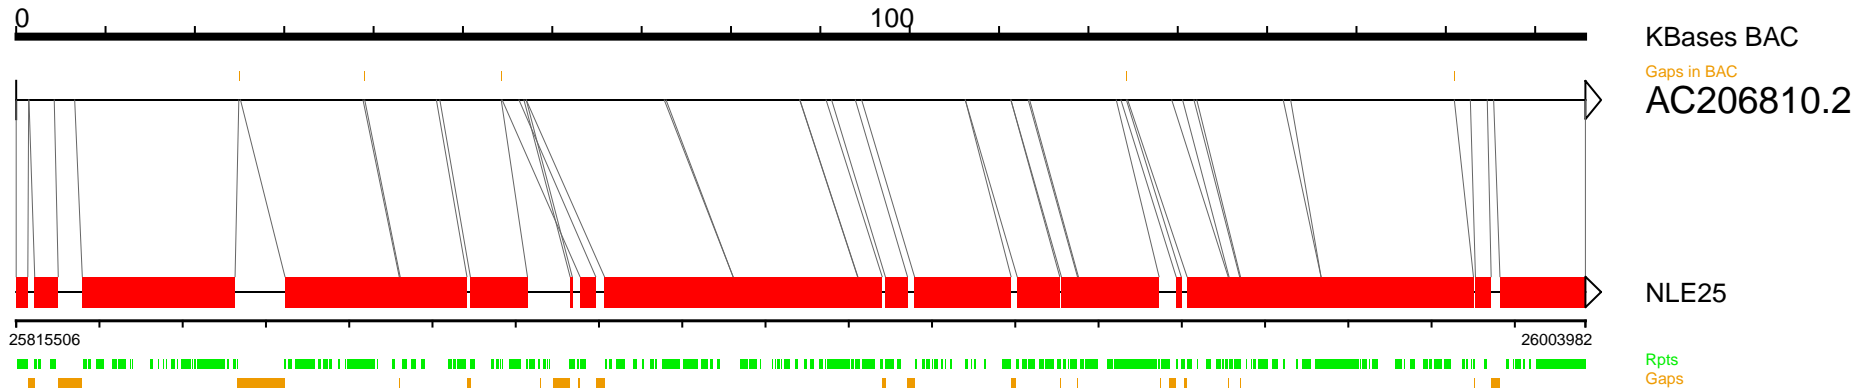

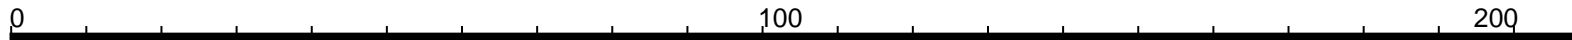

KBases BAC

Gaps in BAC

AC206811.2

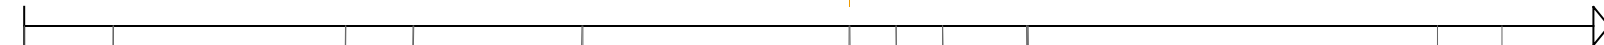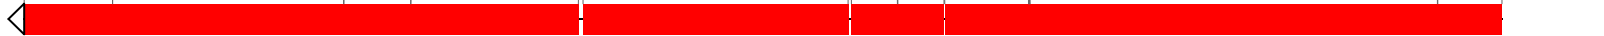

NLEX

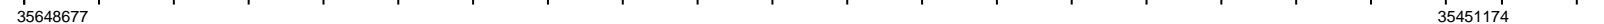

Rpts  
Gaps

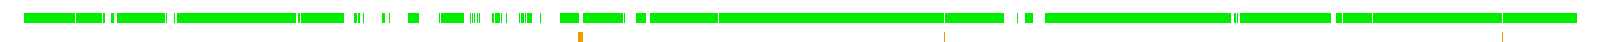

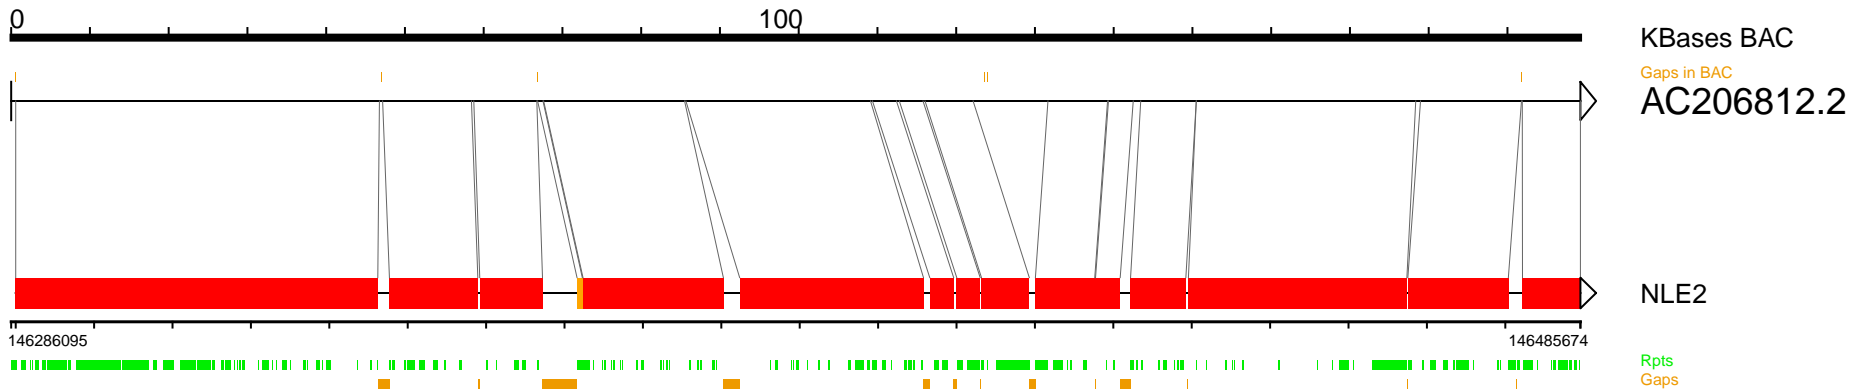

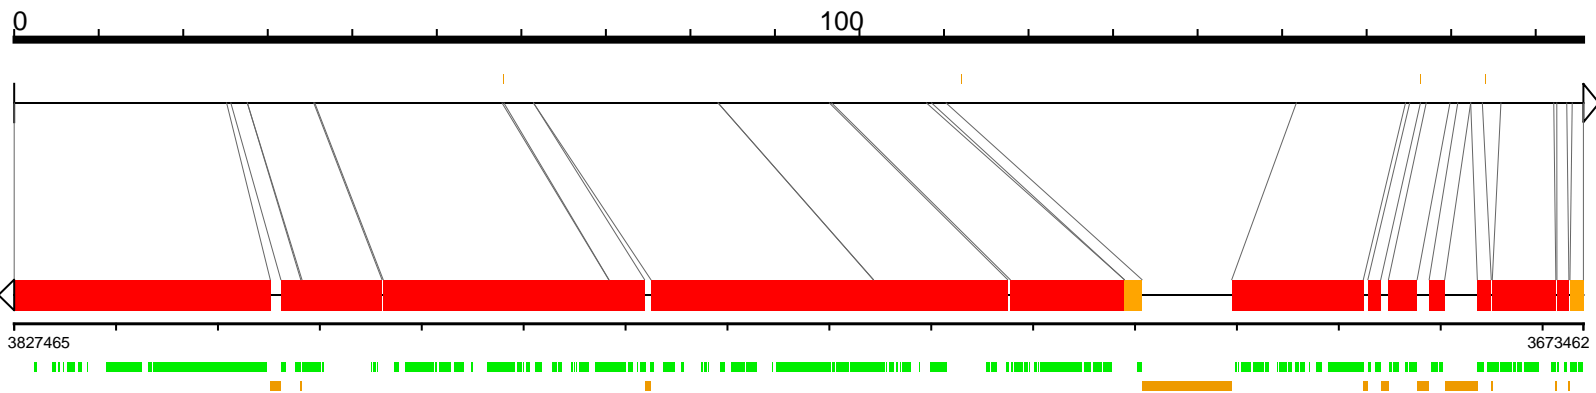

KBases BAC  
Gaps in BAC  
AC207148.3

NLE10

Rpts  
Gaps

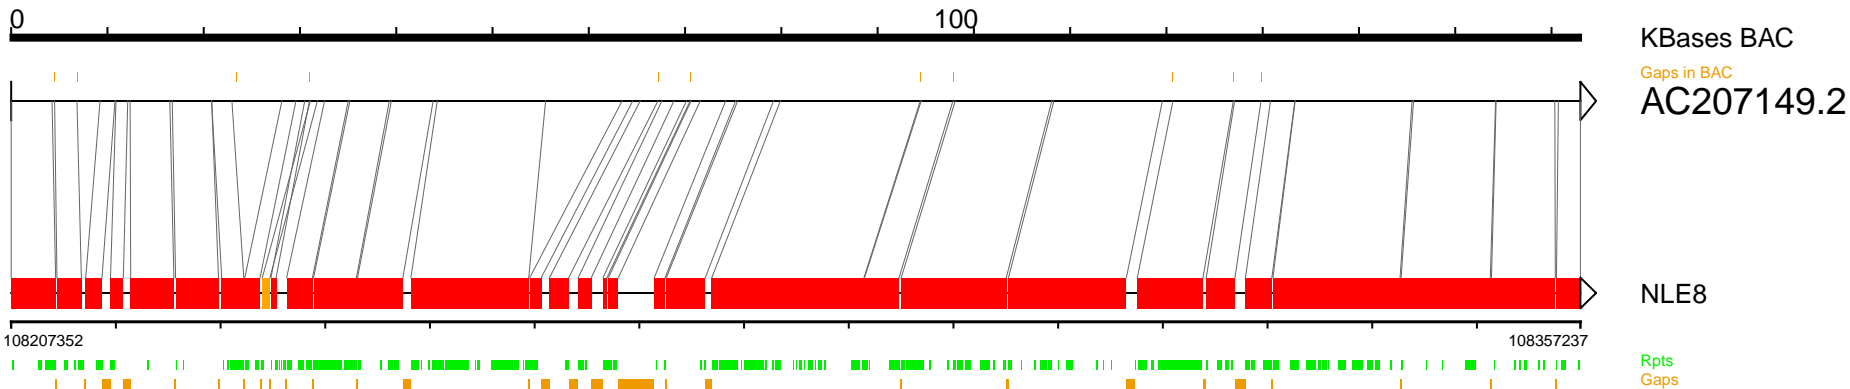

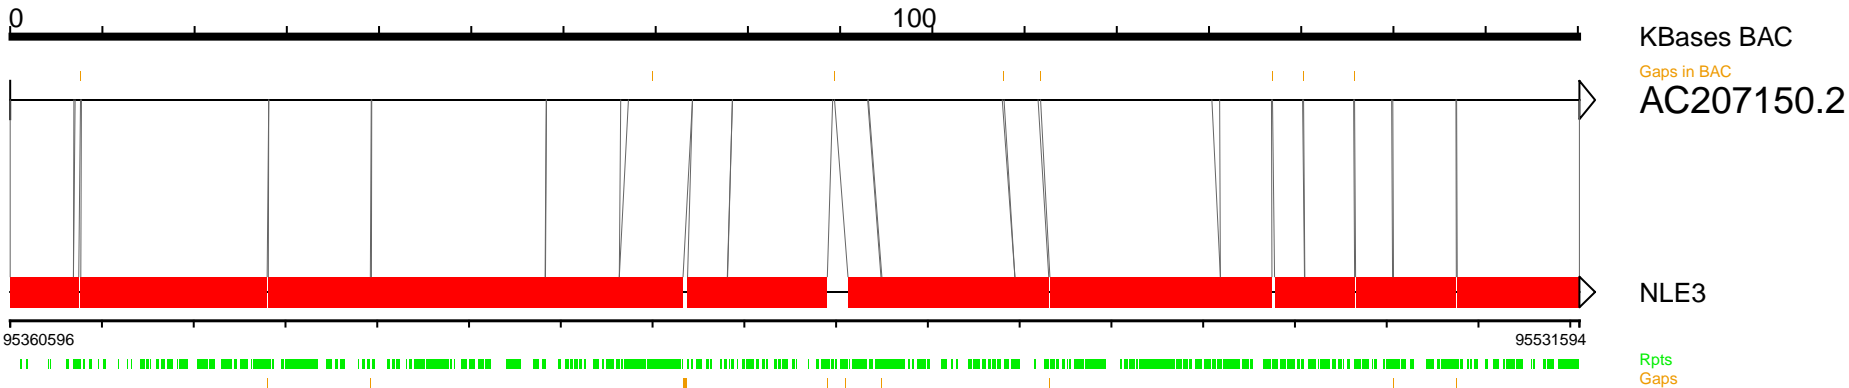

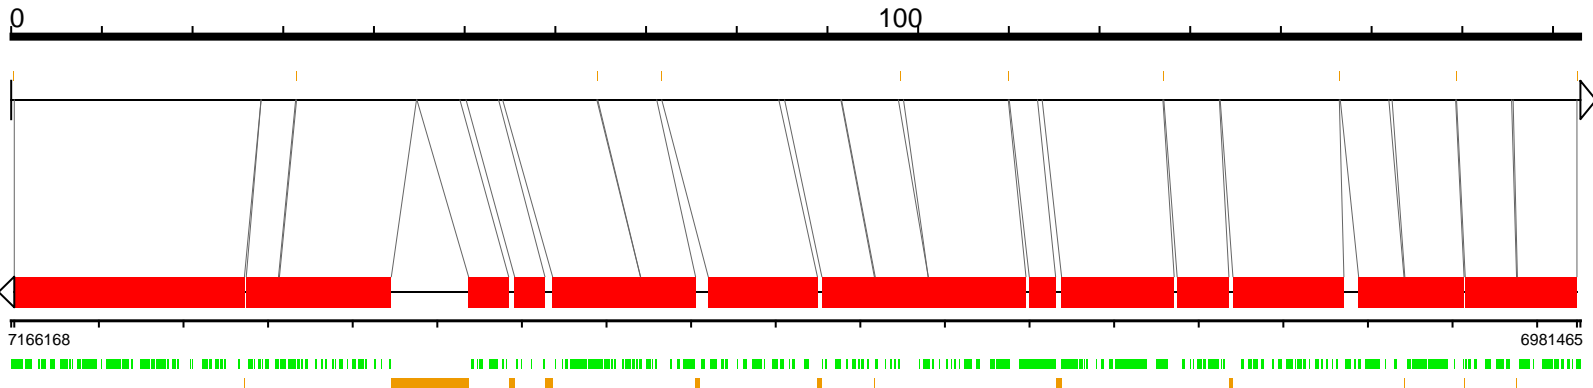

KBases BAC  
AC207151.2

NLE22b

Rpts  
Gaps

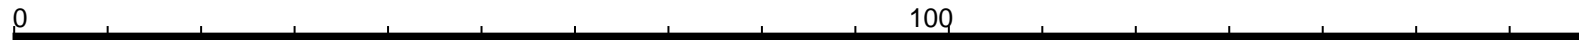

Kbases BAC

Gaps in BAC

AC207152.2

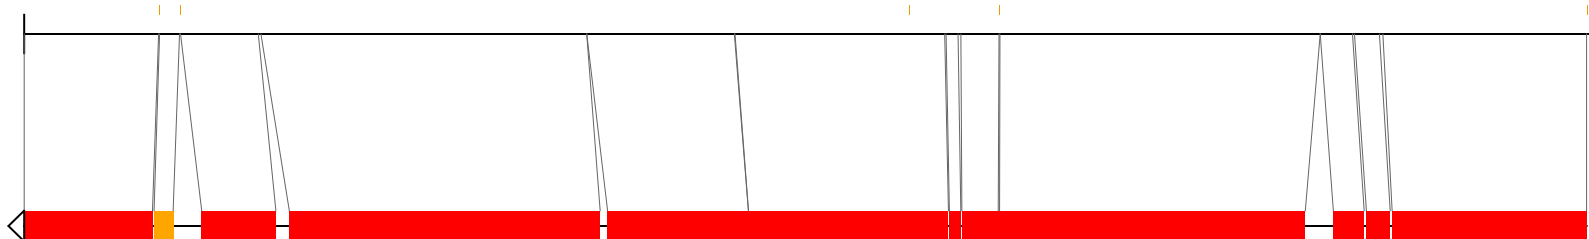

NLE2

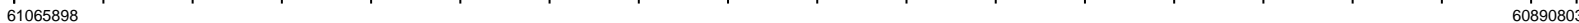

Rpts  
Gaps

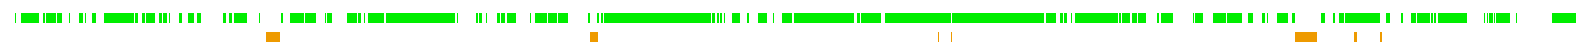

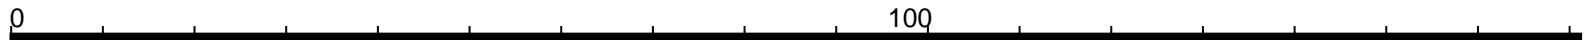

KBases BAC  
AC207501.3

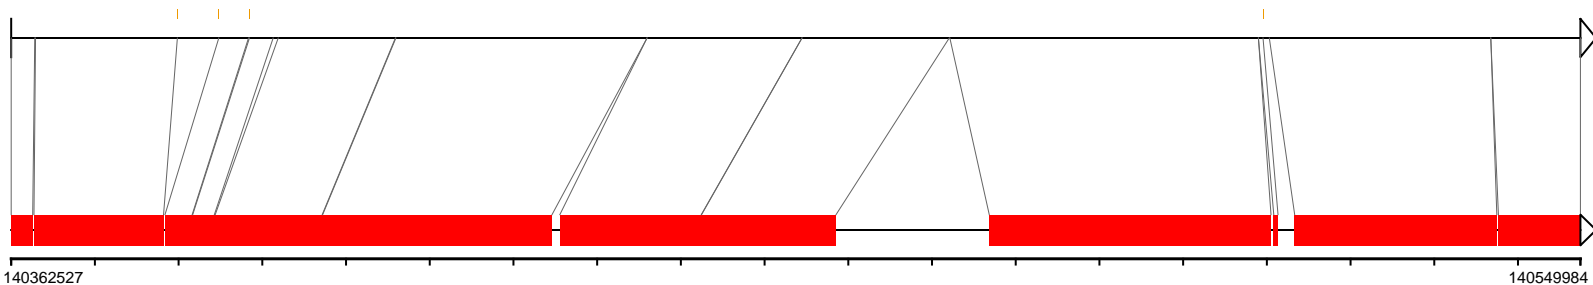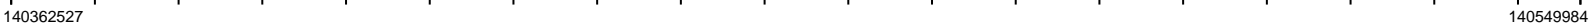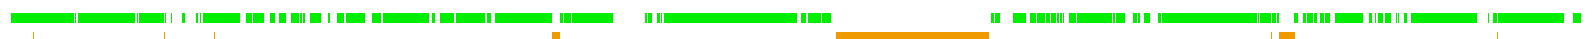

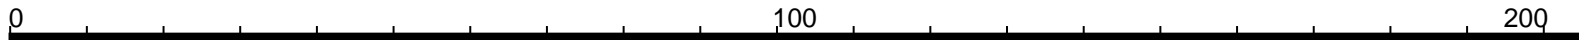

KBases BAC

Gaps in BAC

AC207502.2

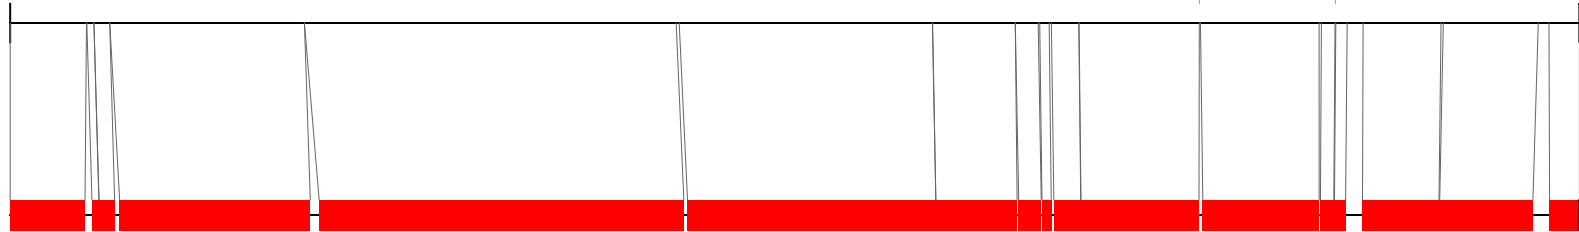

NLE25

25447863

25656459

Rpts  
Gaps

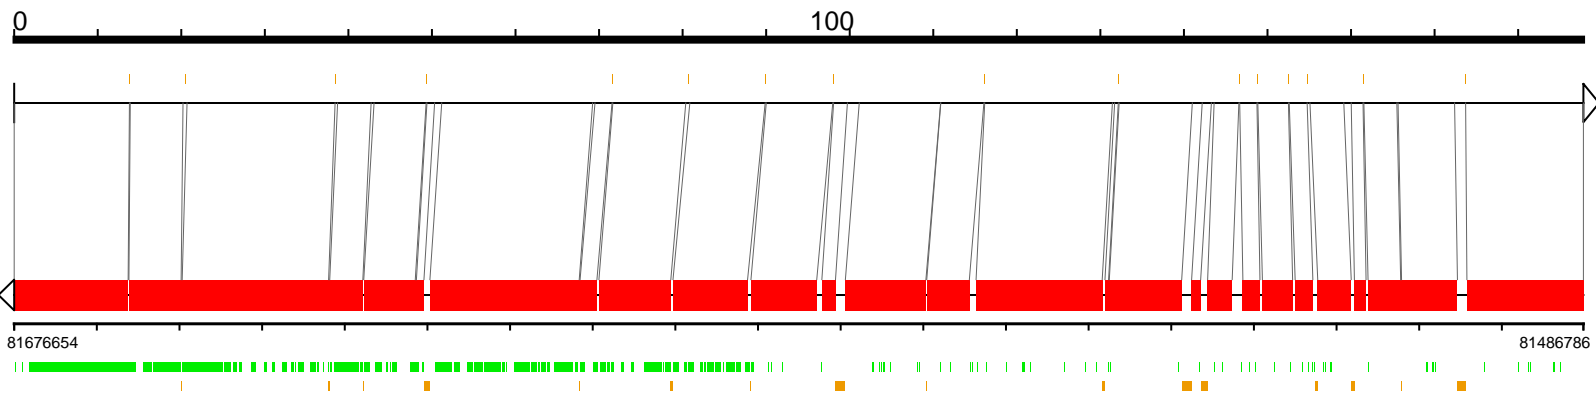

Kbases BAC  
AC207845.2

NLE17

Rpts  
Gaps

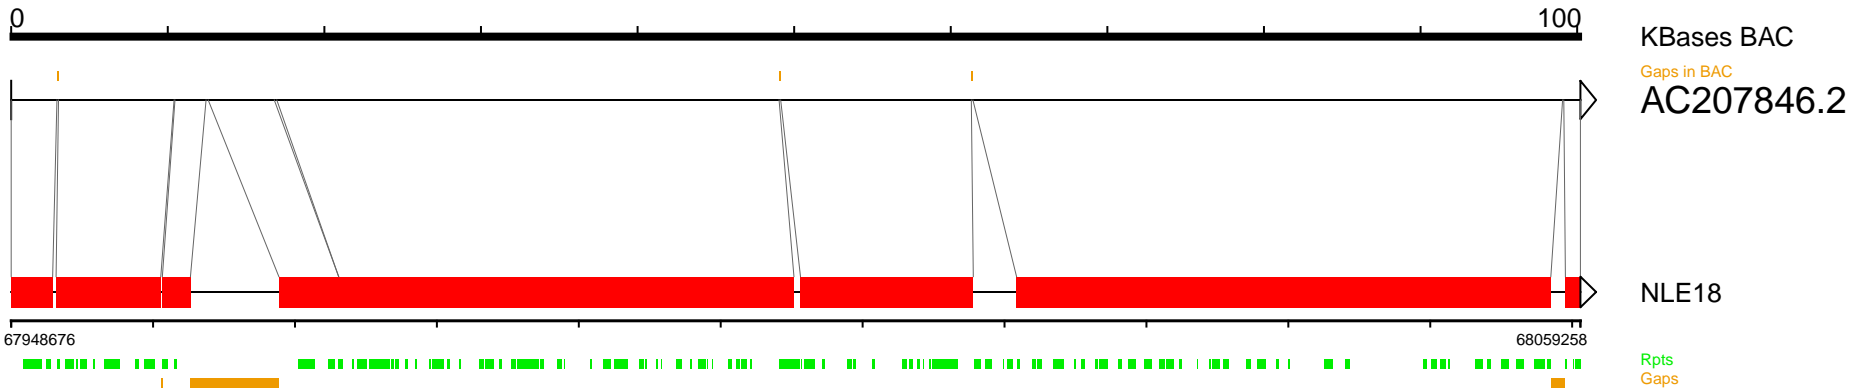

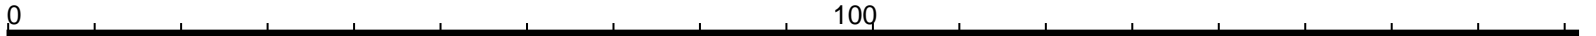

KBases BAC

Gaps in BAC

AC207847.3

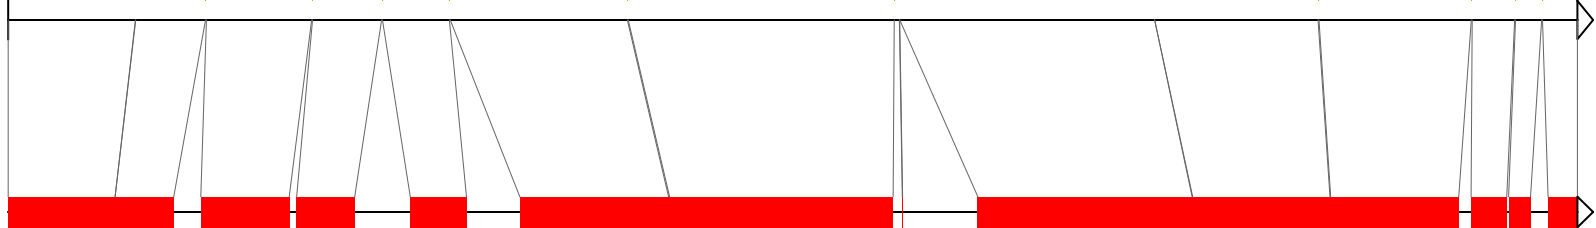

NLE13

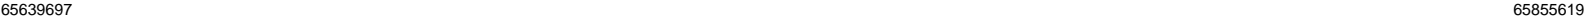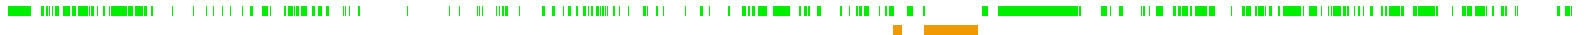

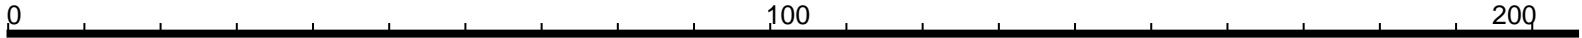

KBases BAC

Gaps in BAC

AC207848.2

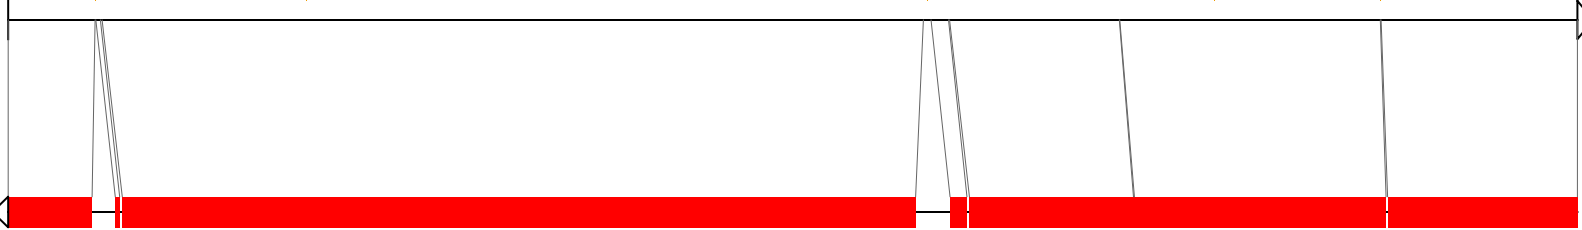

NLE15

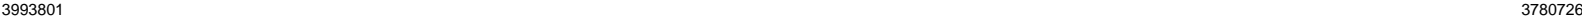

Rpts

Gaps

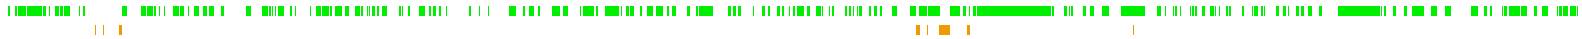

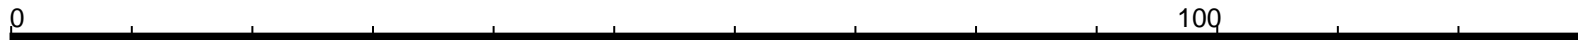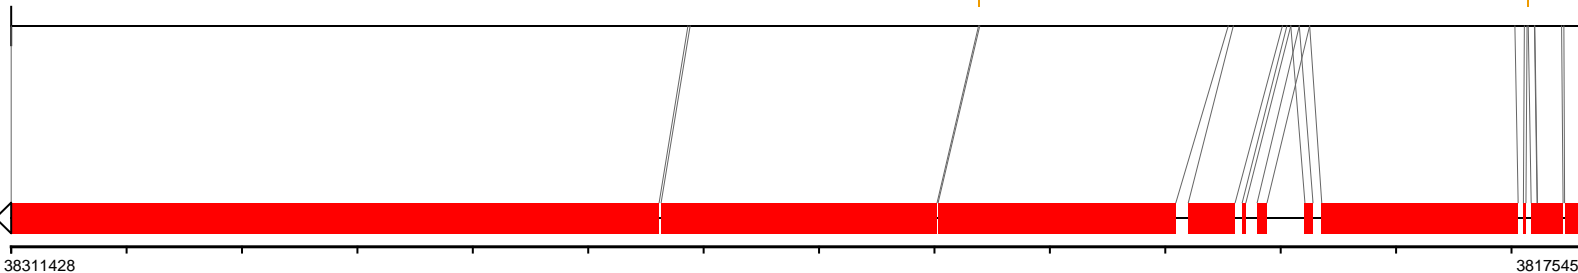

Kbases BAC

Gaps in BAC

AC207849.3

NLE2

Rpts

Gaps

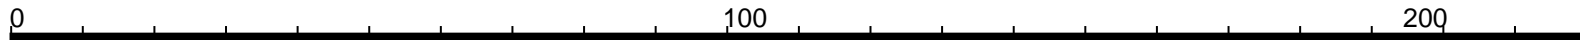

Kbases BAC

Gaps in BAC

AC207850.2

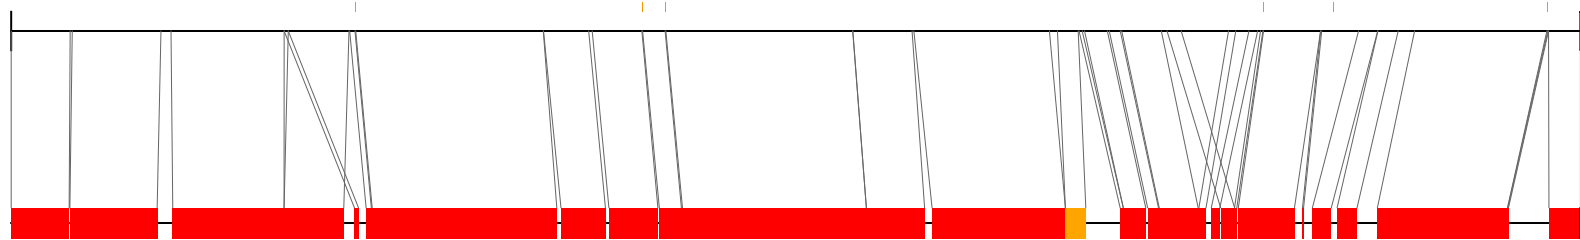

NLE25

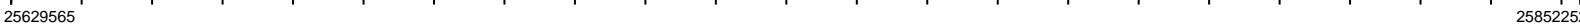

Rpts  
Gaps

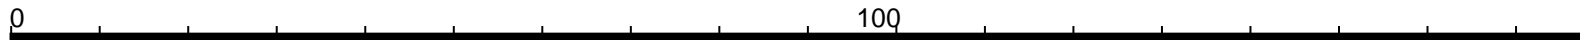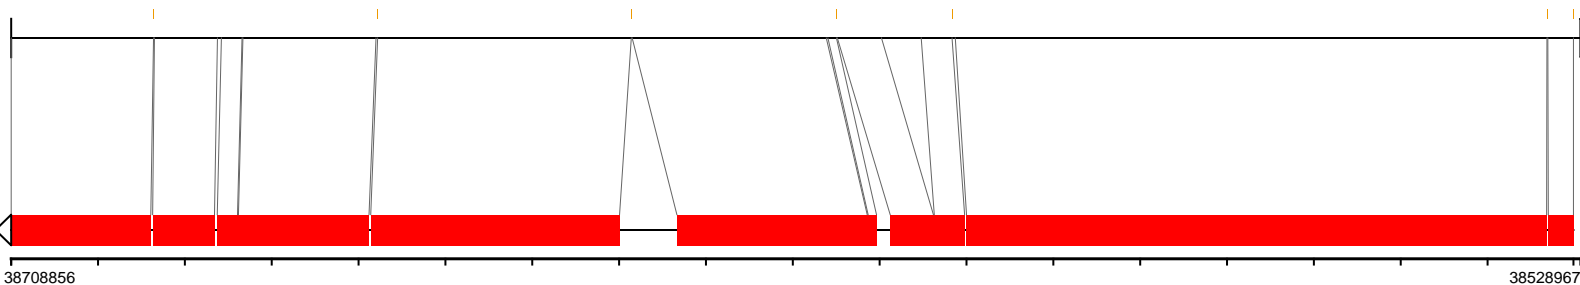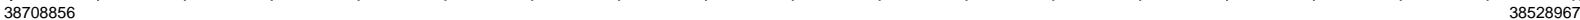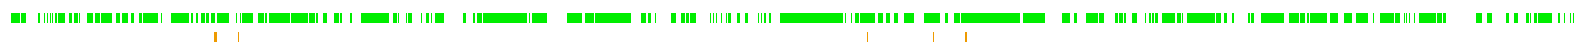

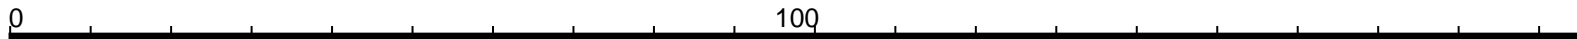

KBases BAC

Gaps in BAC

AC207852.2

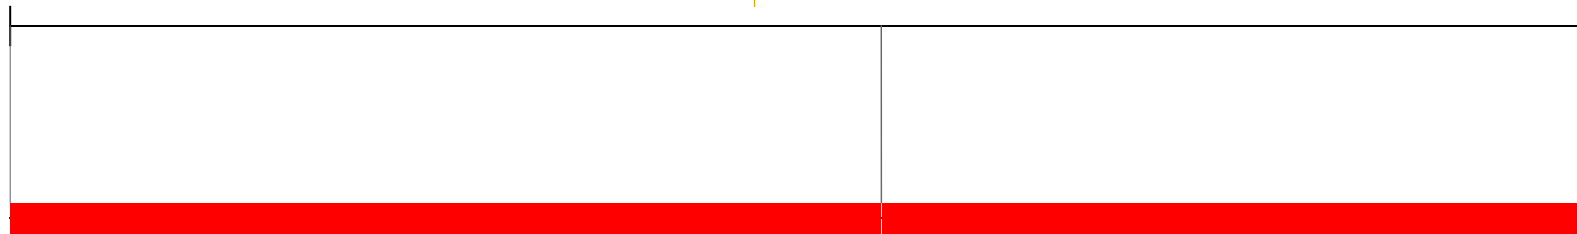

NLE11

63713262

63908255

Rpts  
Gaps

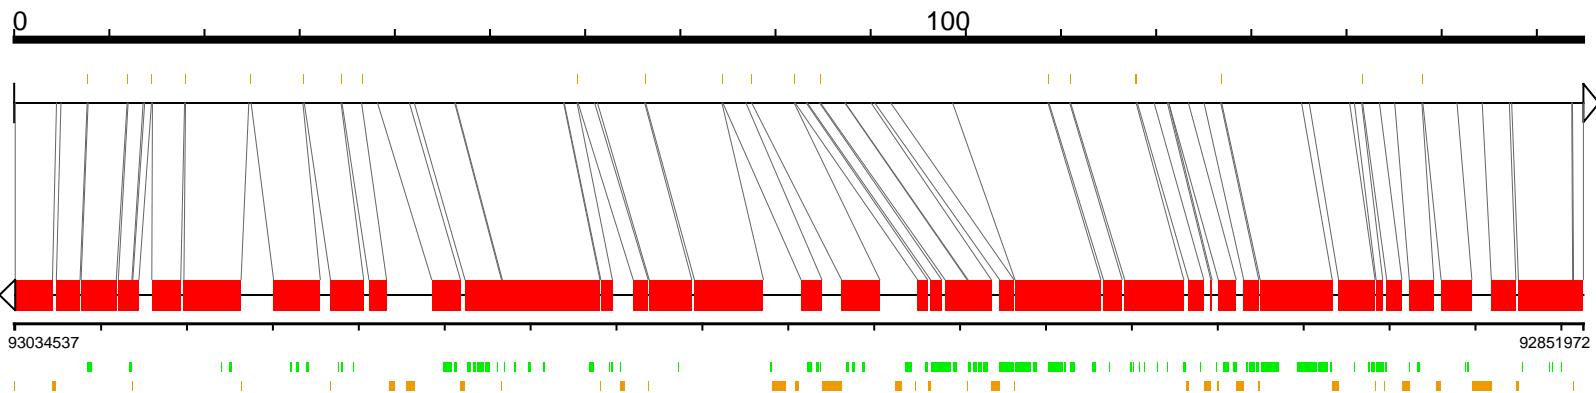

Kbases BAC  
Gaps in BAC  
**AC207853.2**

**NLE4**

Rpts  
Gaps

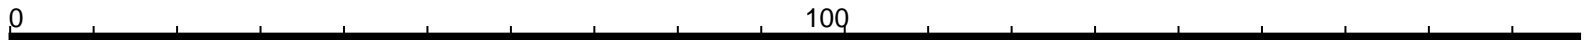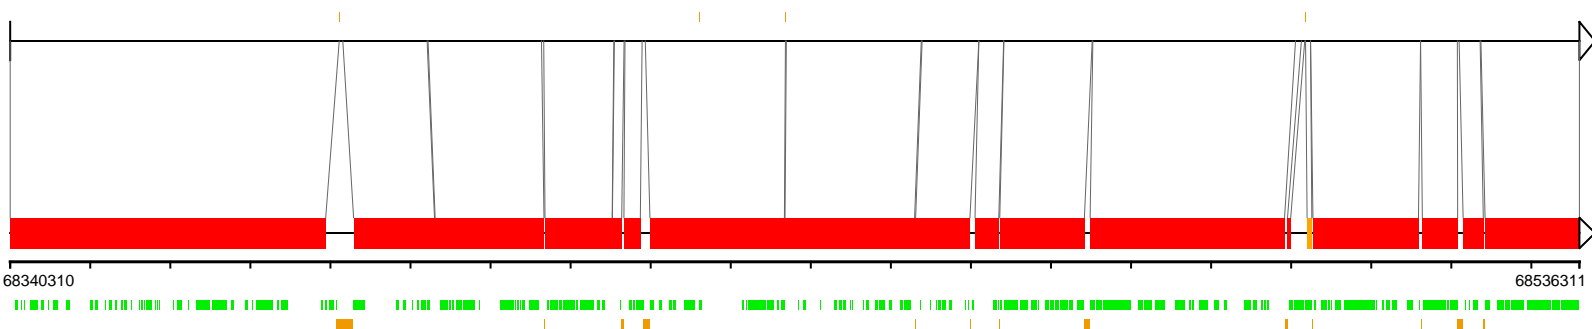

KBases BAC  
Gaps in BAC  
AC207854.2

NLE18

Rpts  
Gaps

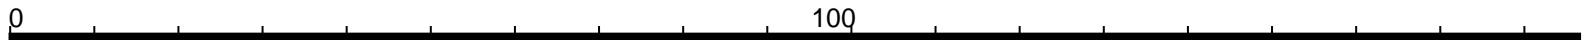

KBases BAC  
AC208277.2

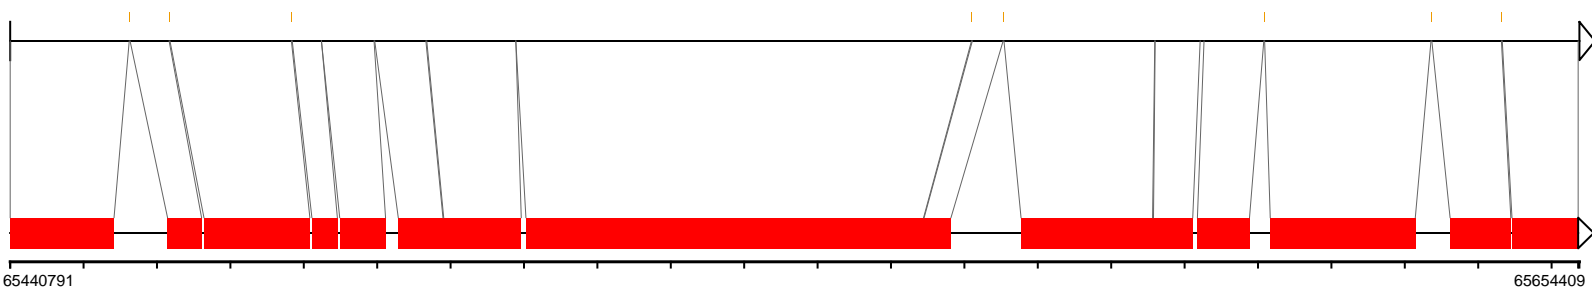

NLE13

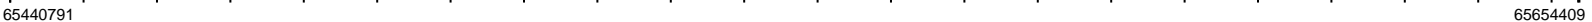

Rpts  
Gaps

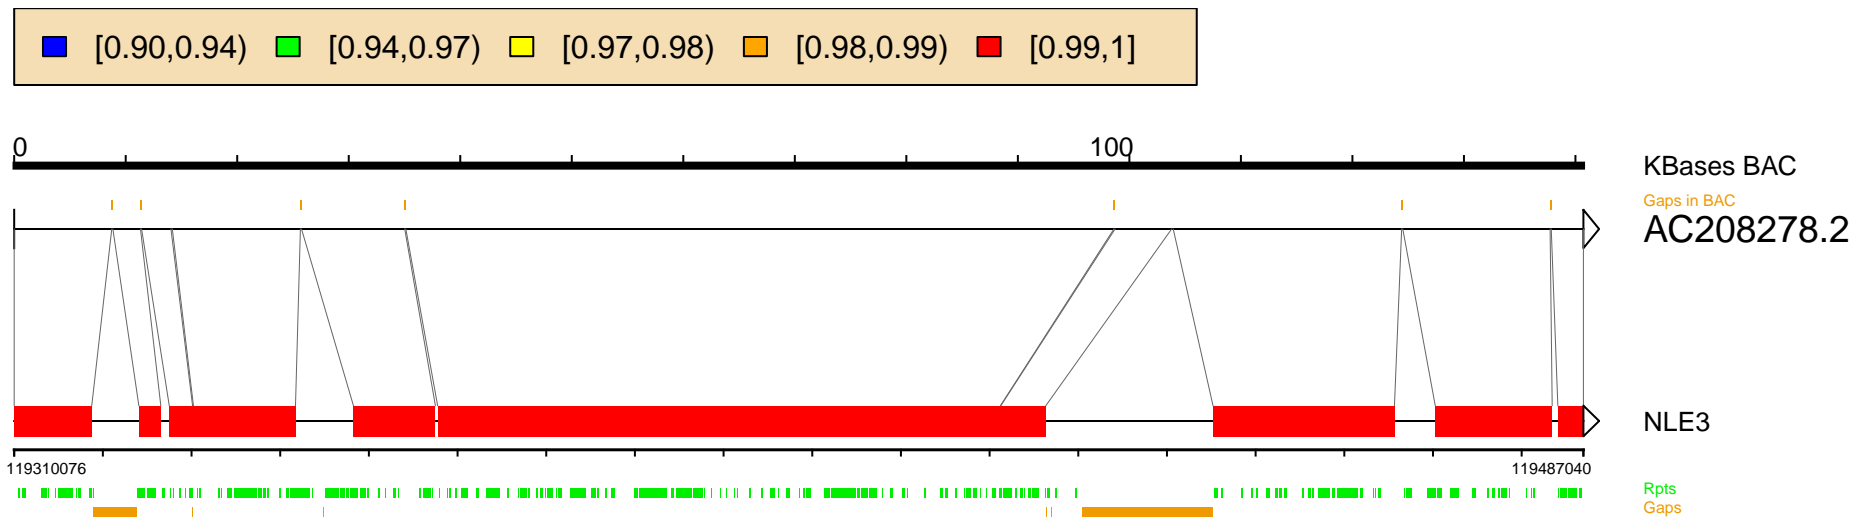

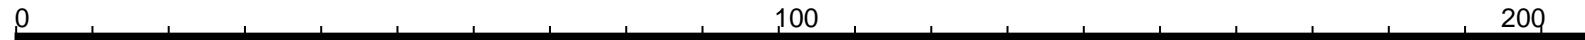

Kbases BAC

Gaps in BAC

AC208279.2

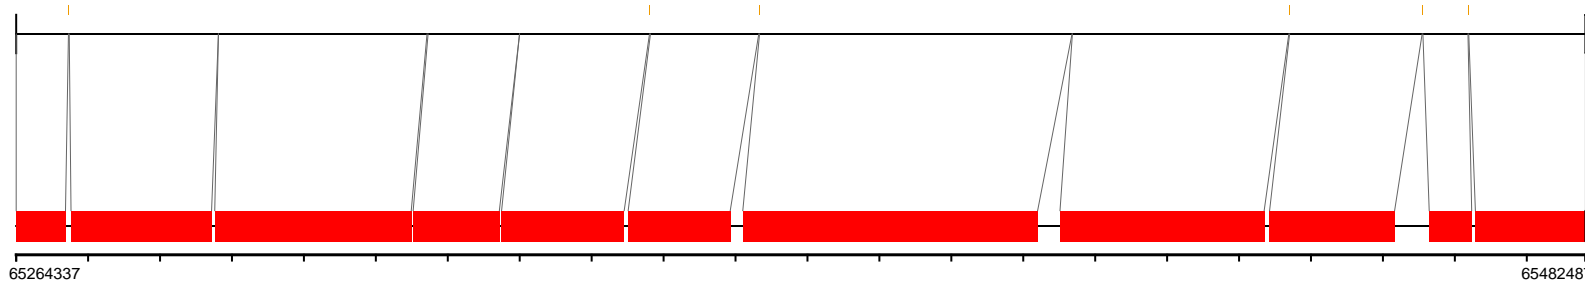

NLE13

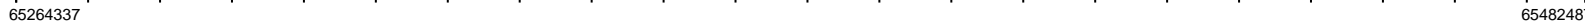

Rpts  
Gaps

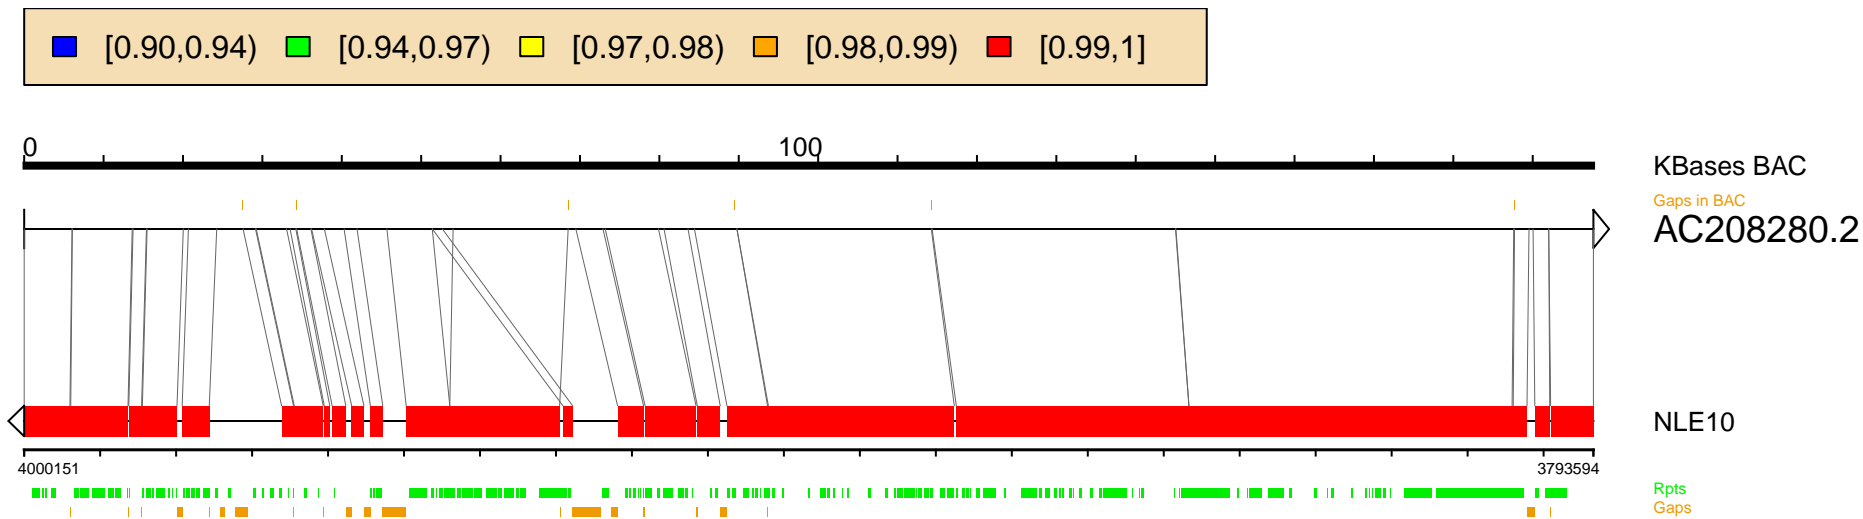

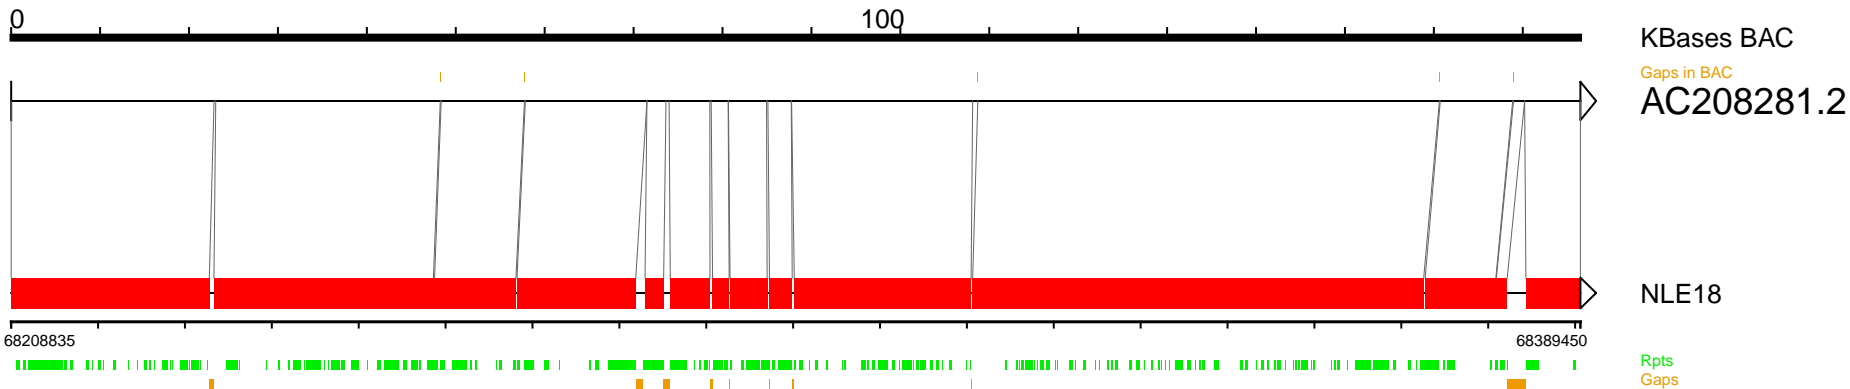

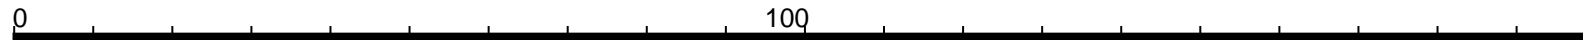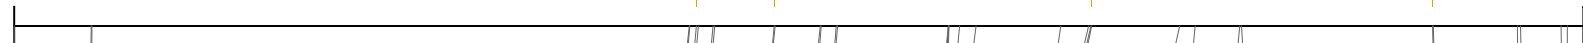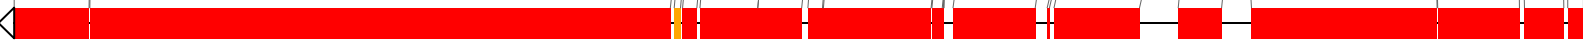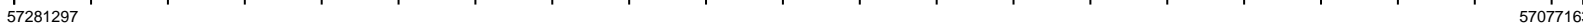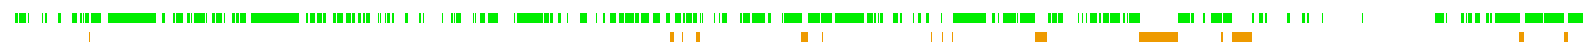

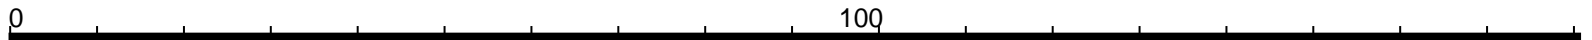

Kbases BAC

Gaps in BAC

AC208283.2

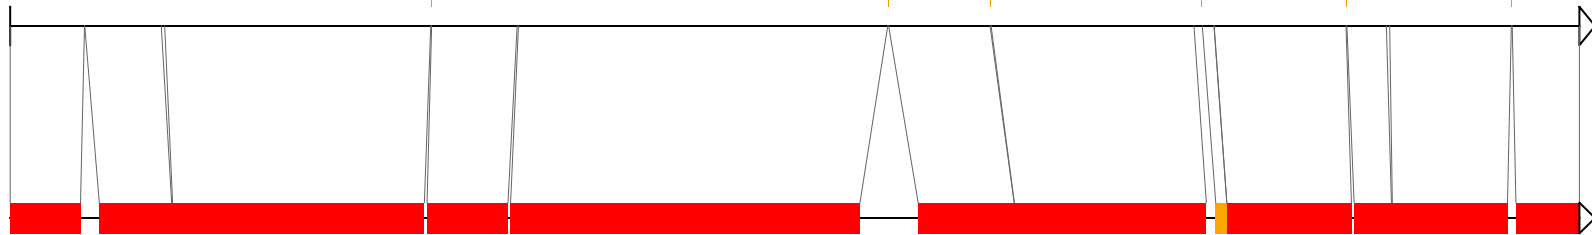

NLE1b

85790258

85981105

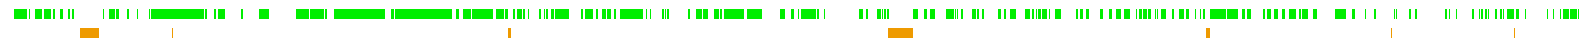

Rpts  
Gaps

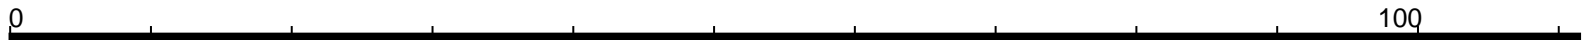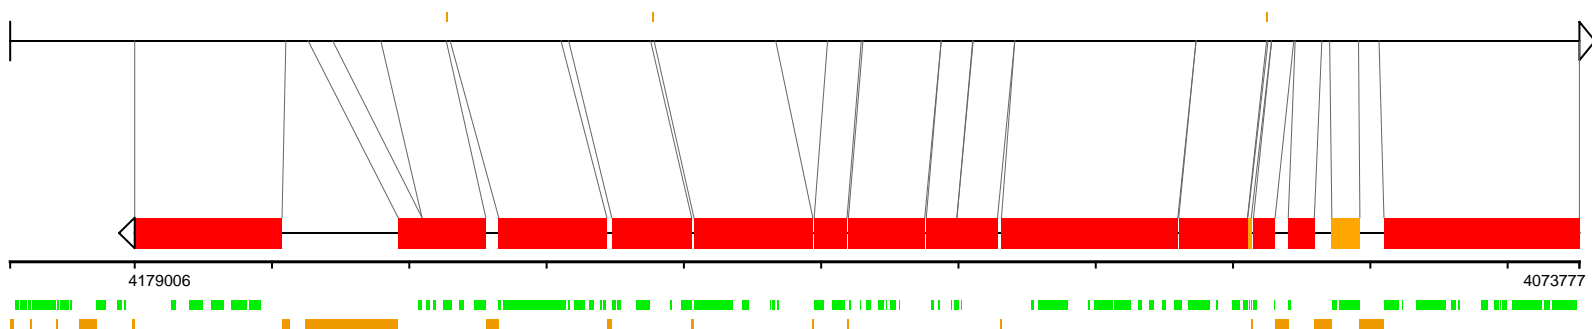

Kbases BAC  
Gaps in BAC  
AC208284.3

NLE10

Rpts  
Gaps

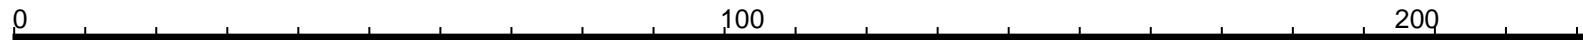

KBases BAC

Gaps in BAC

AC208285.2

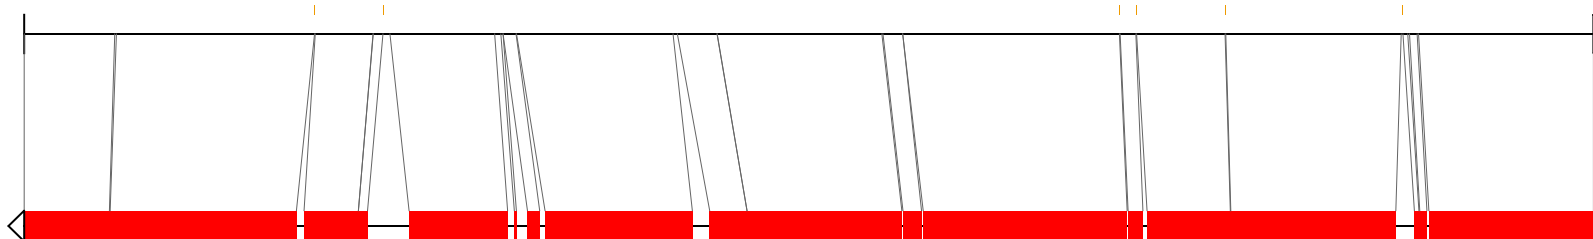

NLE2

84323634 84088863

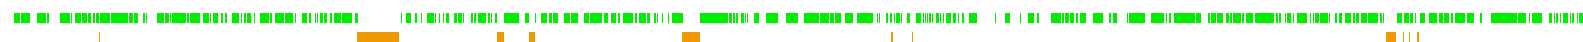

Rpts  
Gaps

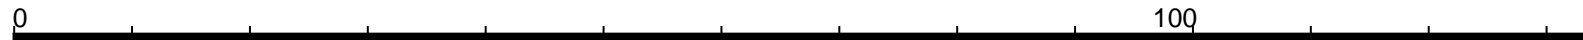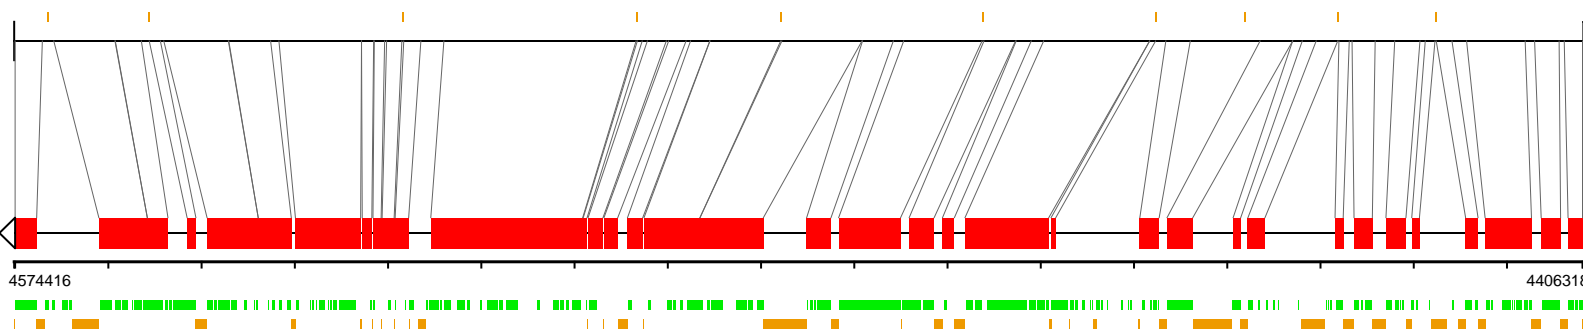

Kbases BAC  
Gaps in BAC  
AC208286.2

NLE10

Rpts  
Gaps

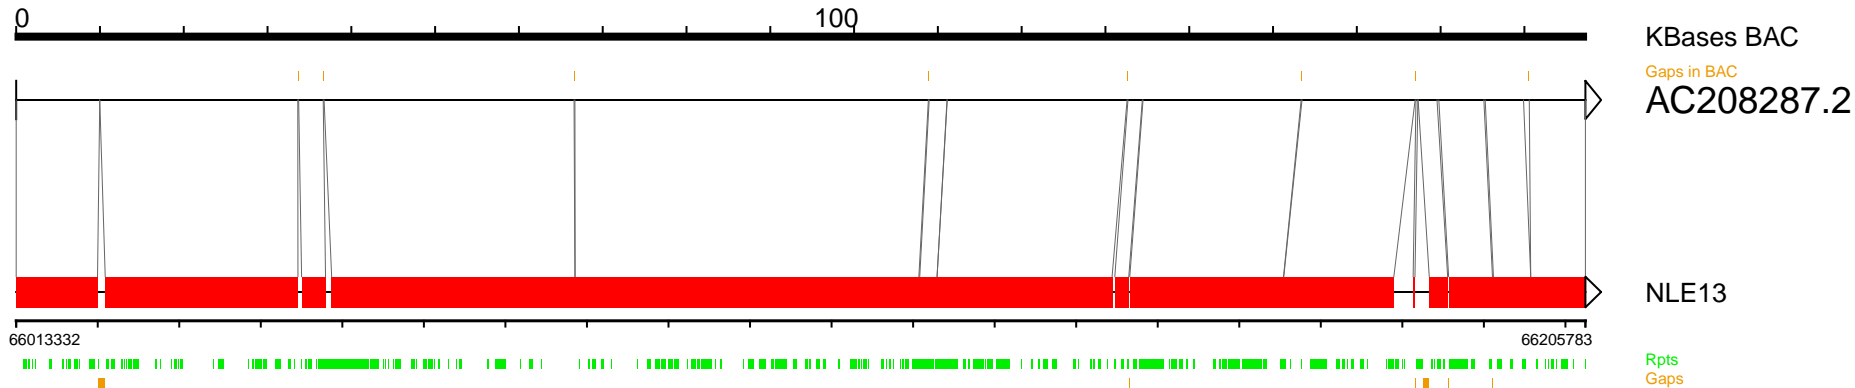

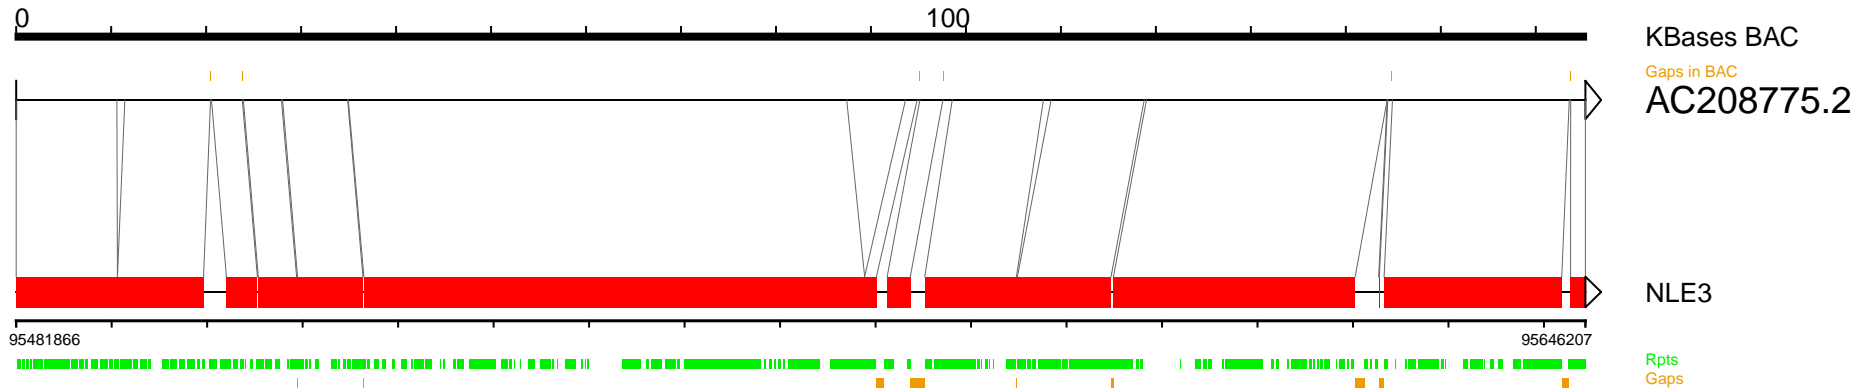

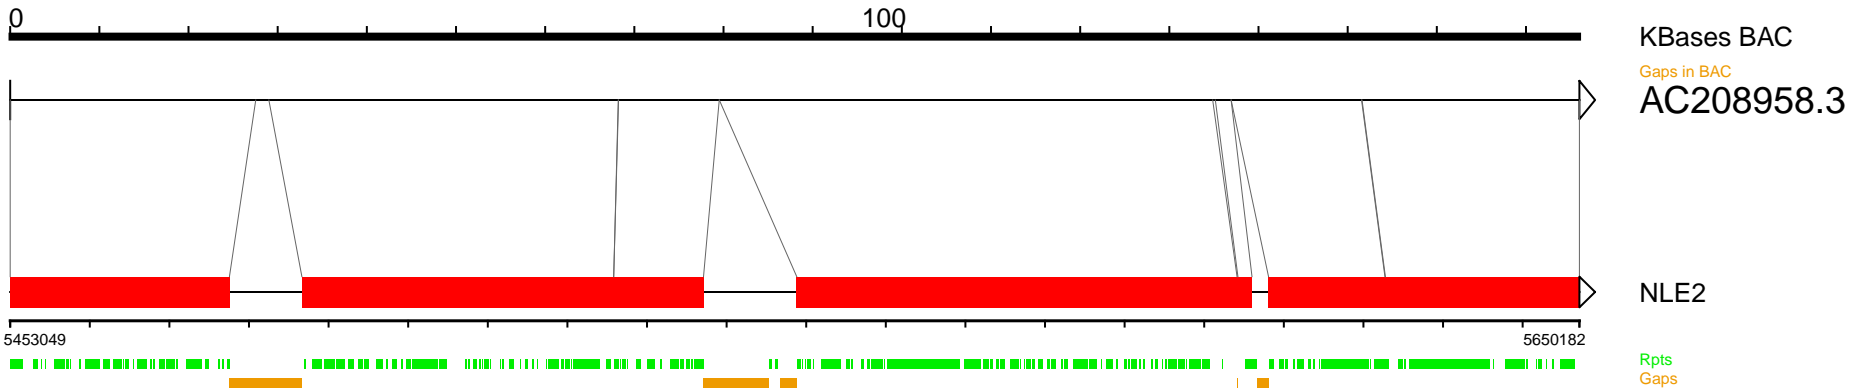



Kbases BAC

Gaps in BAC

AC208960.3

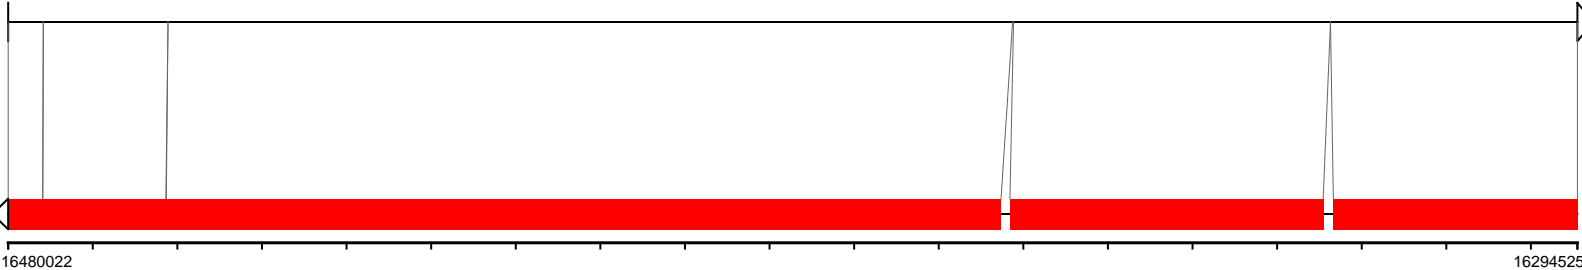

NLE11

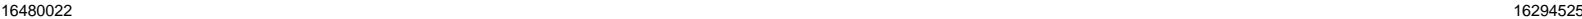

Rpts

Gaps



KBases BAC

Gaps in BAC

AC208964.4



NLE2

88879466

89061725

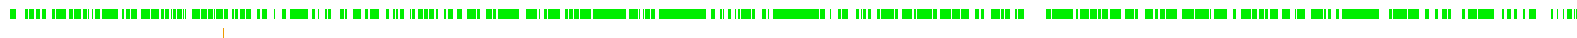

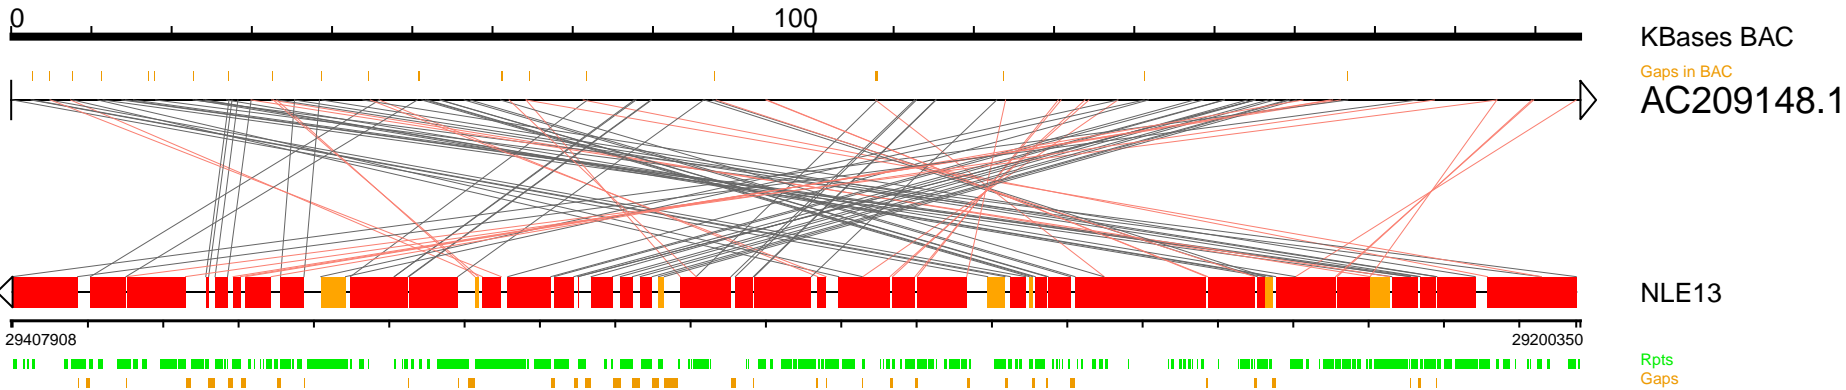

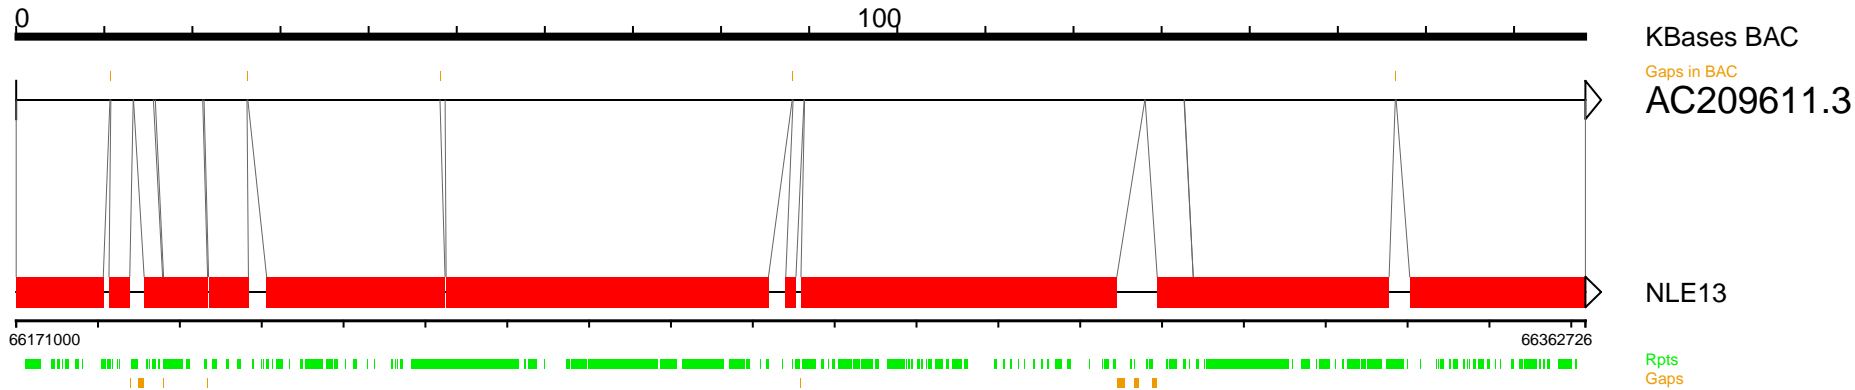

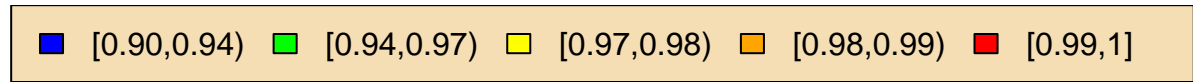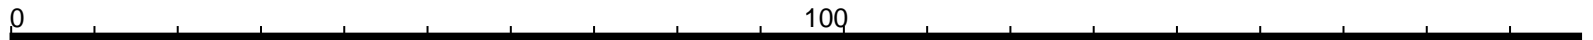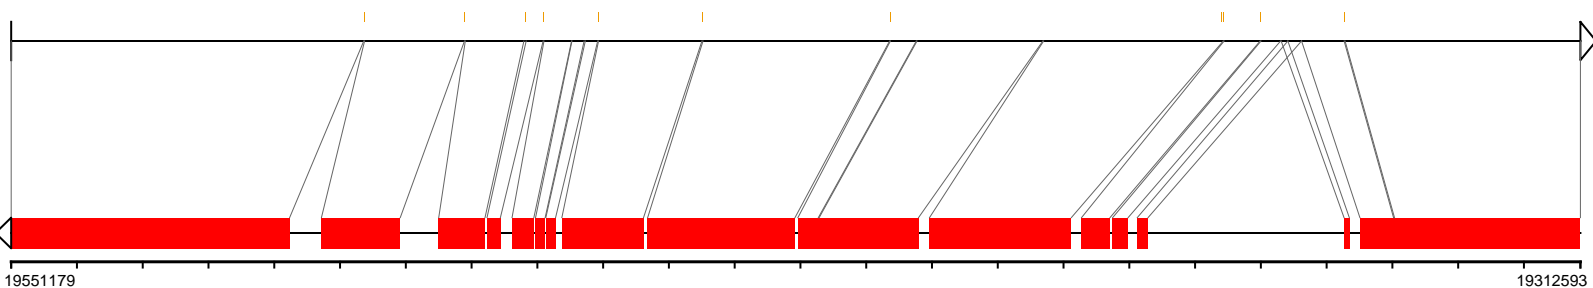

KBases BAC

Gaps in BAC

AC209612.2

NLE13

Rpts  
Gaps

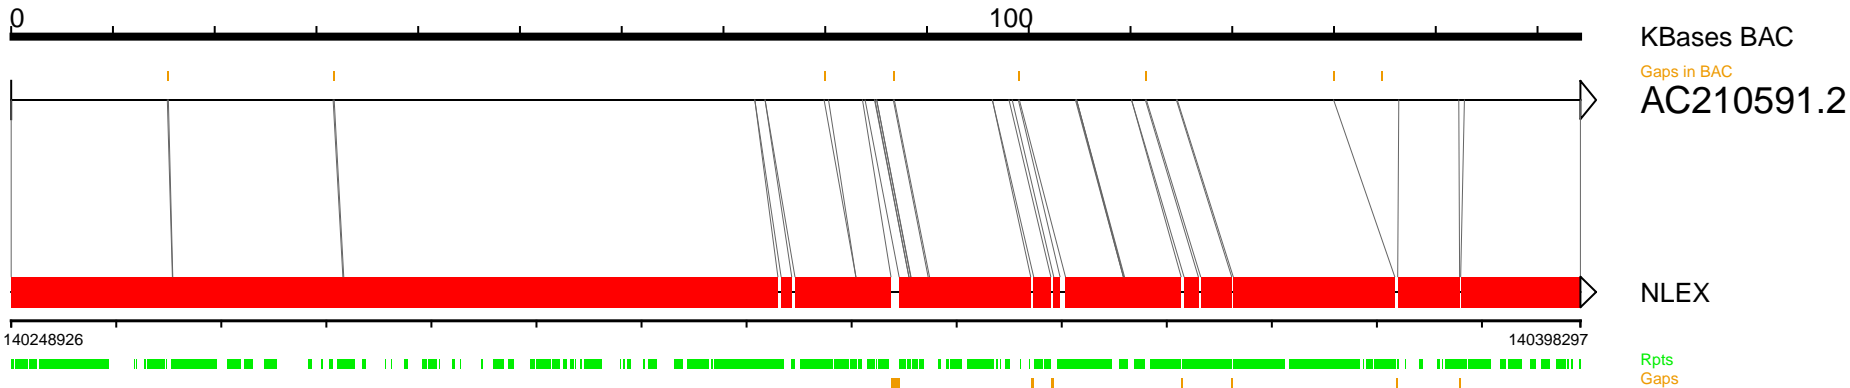

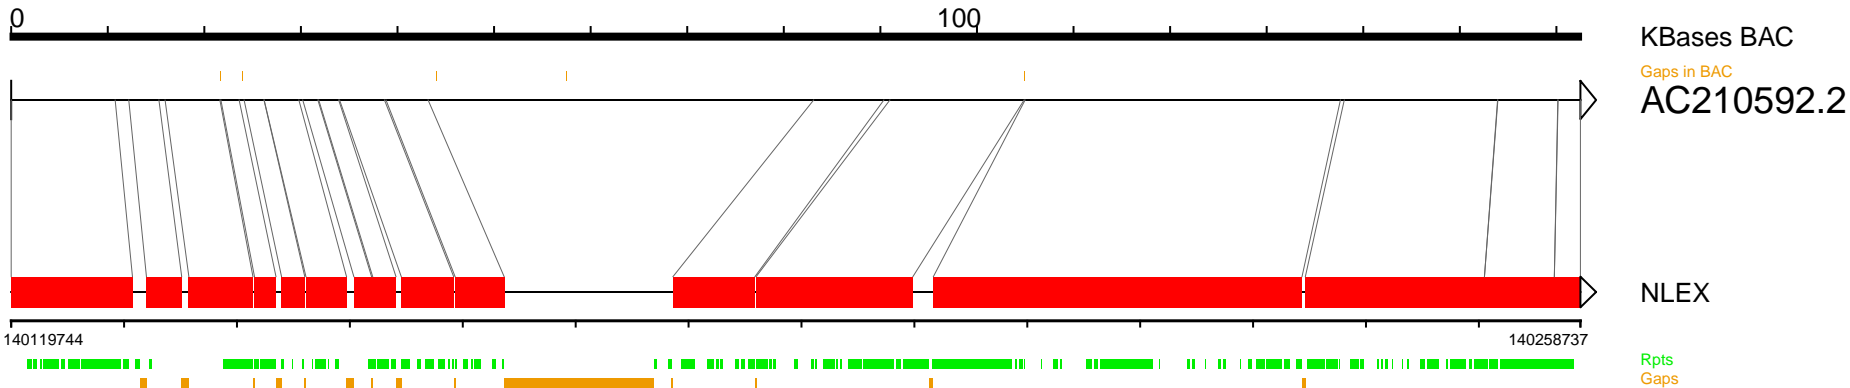

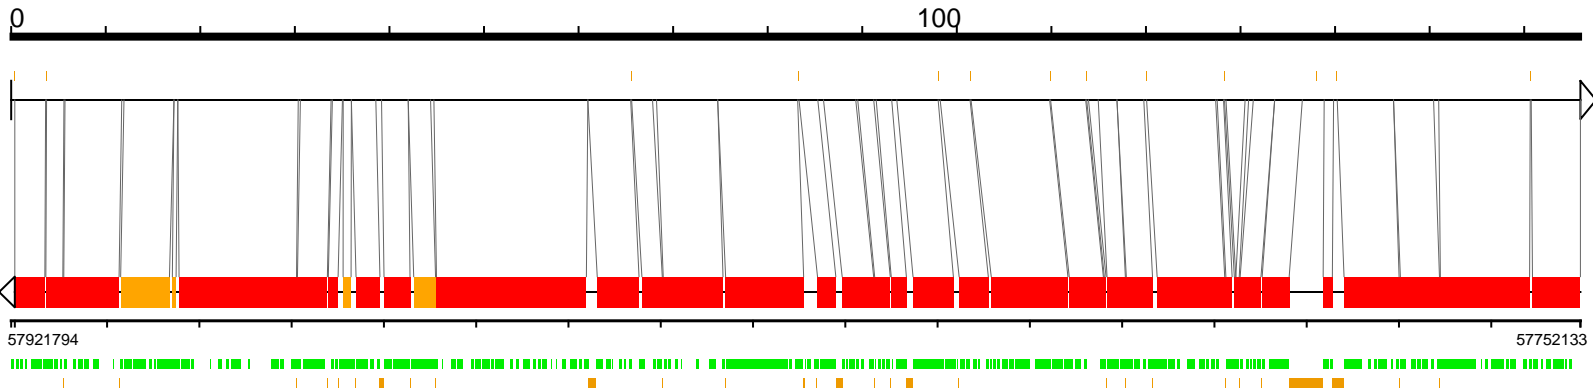

KBases BAC  
AC211131.3

NLE3

Rpts  
Gaps

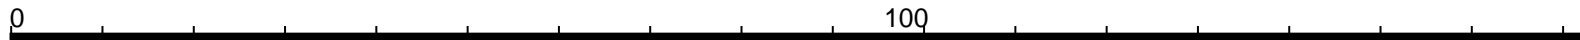

Kbases BAC

Gaps in BAC

AC211599.4

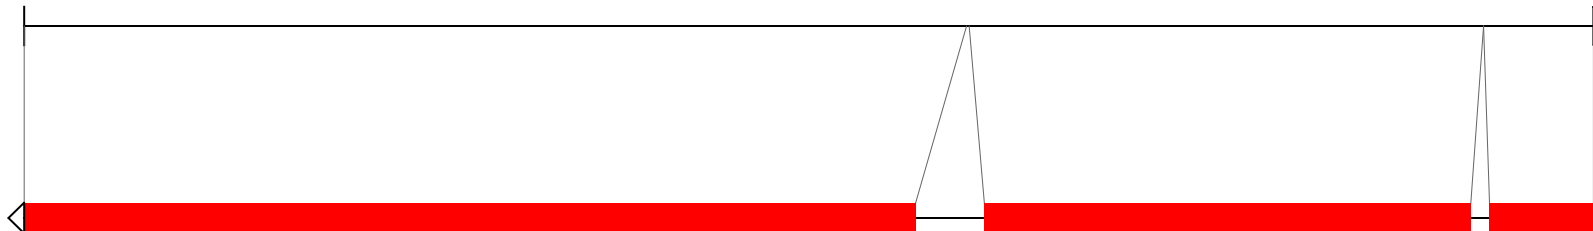

78242142 78060484

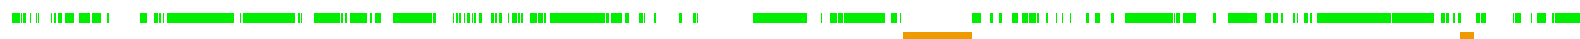

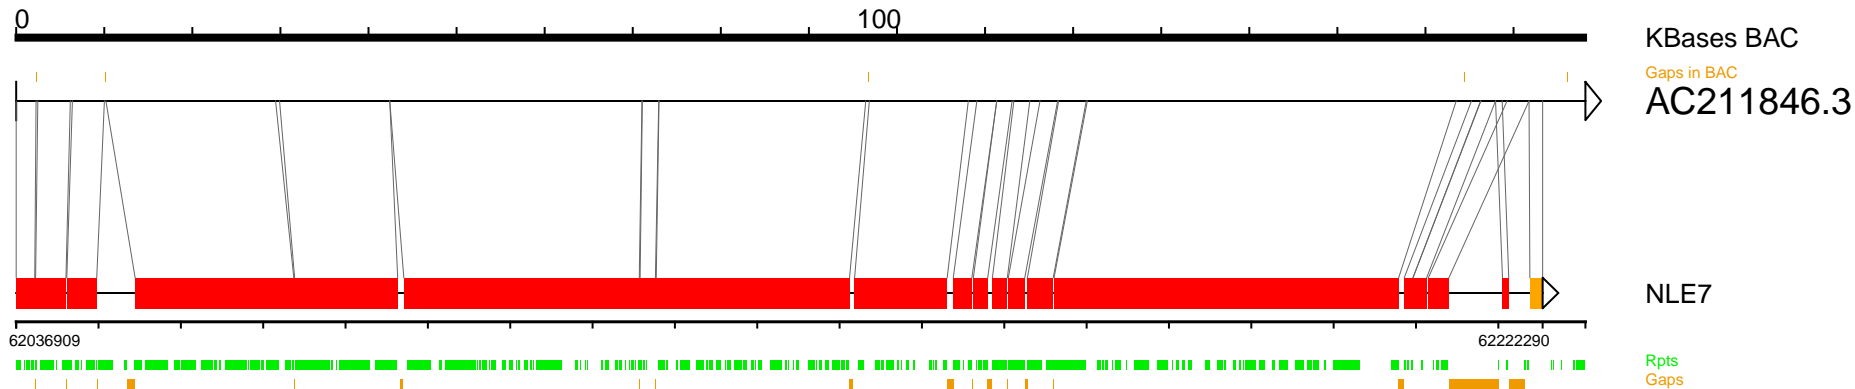

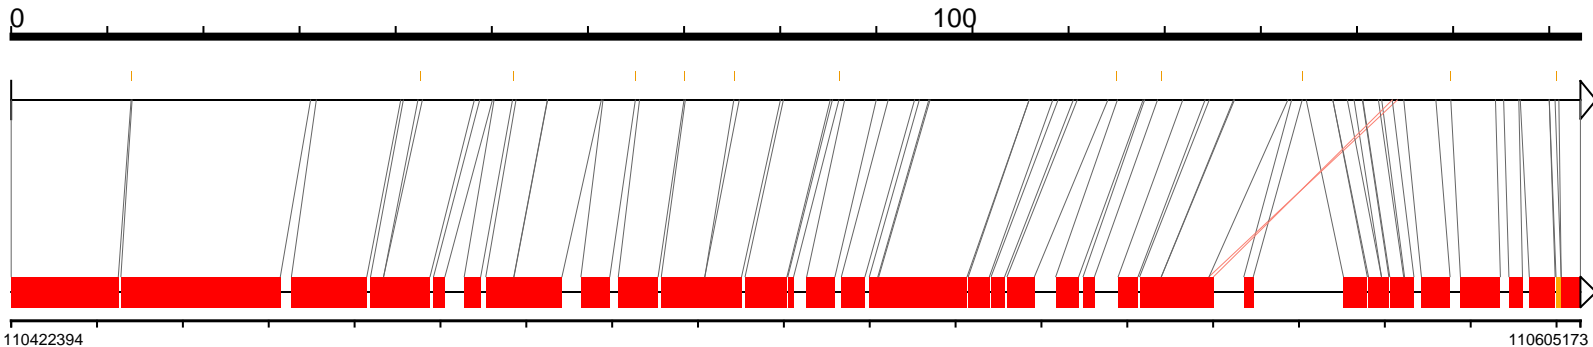

KBases BAC

Gaps in BAC

AC212965.2

NLEX

Rpts

Gaps

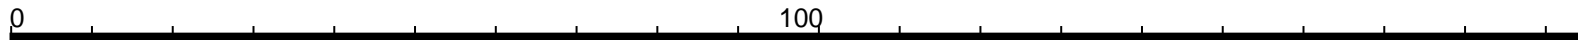

KBases BAC

Gaps in BAC

AC214603.3

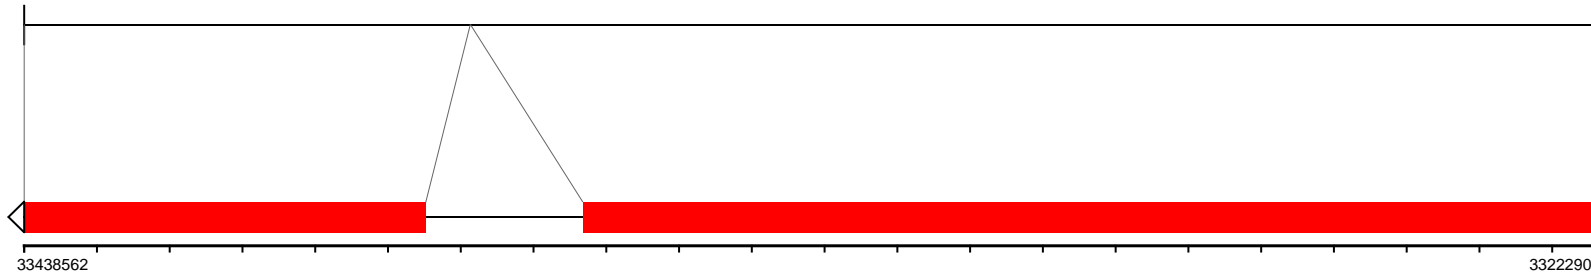

NLE6

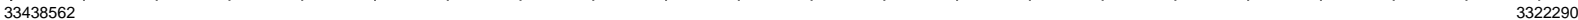

Rpts  
Gaps

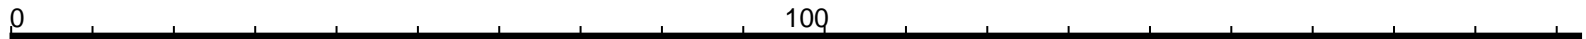

KBases BAC  
Gaps in BAC  
AC214604.3

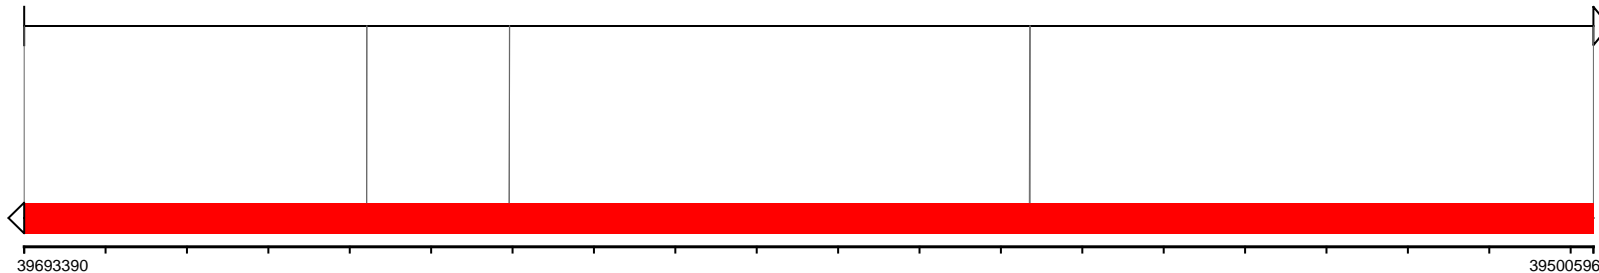

NLE20

Rpts  
Gaps

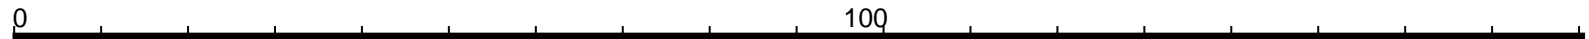

KBases BAC  
AC214645.3

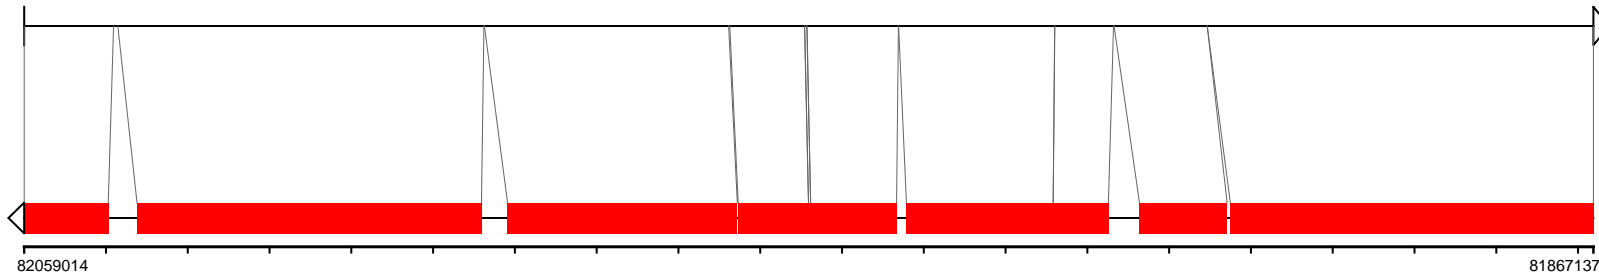

NLE2

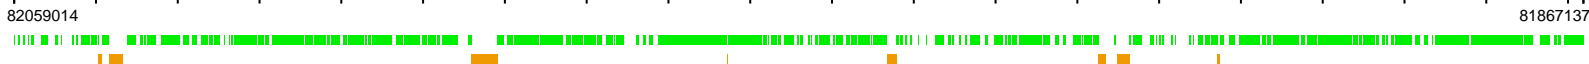

Rpts  
Gaps

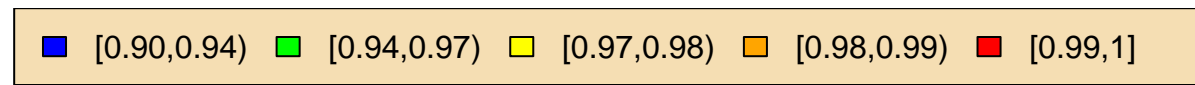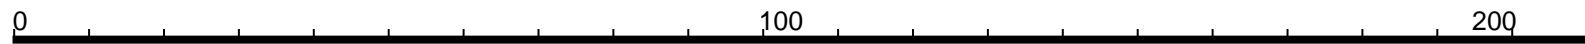

Kbases BAC  
Gaps in BAC  
AC214647.3

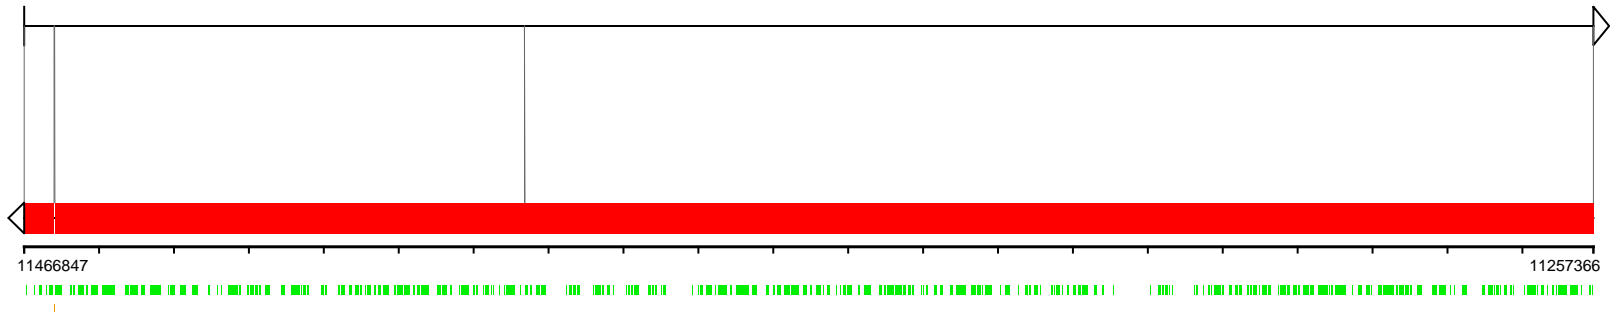

NLE13

Rpts  
Gaps

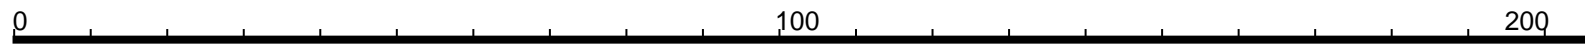

KBases BAC  
Gaps in BAC  
AC214653.3

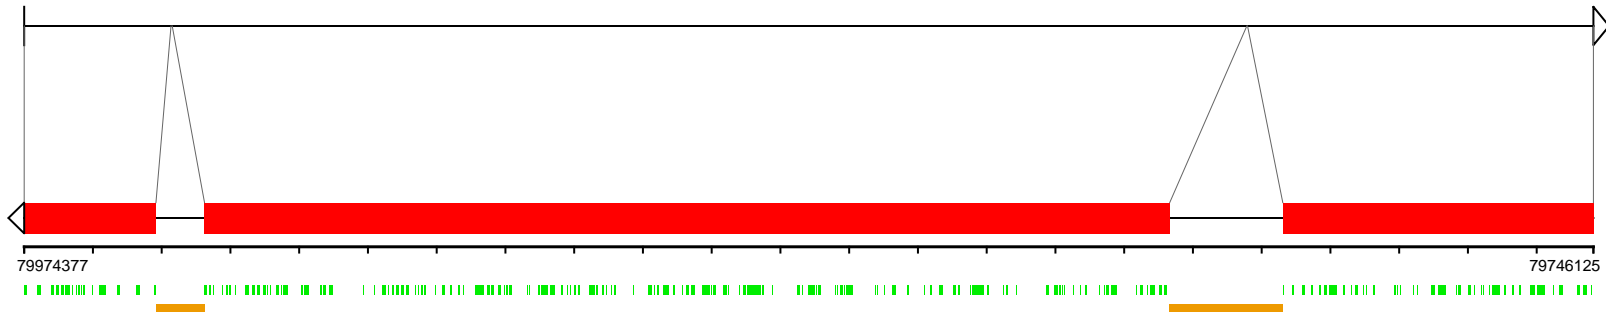

NLE17

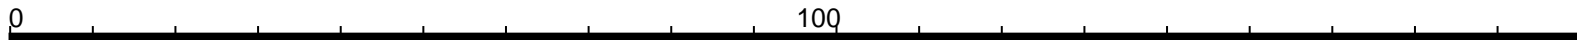

KBases BAC

Gaps in BAC

AC214972.4

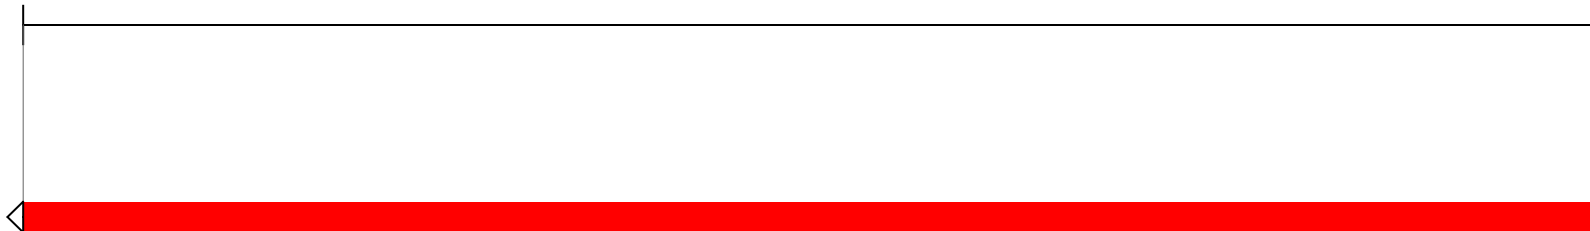

NLE6

61265582

61075681

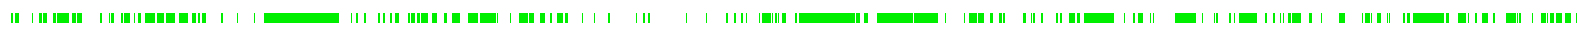

Rpts  
Gaps



Kbases BAC

Gaps in BAC

AC215262.3

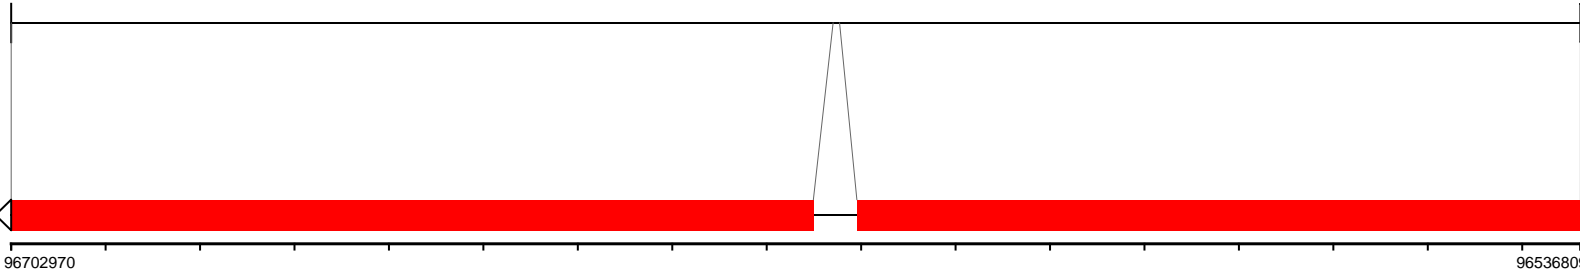

NLE7

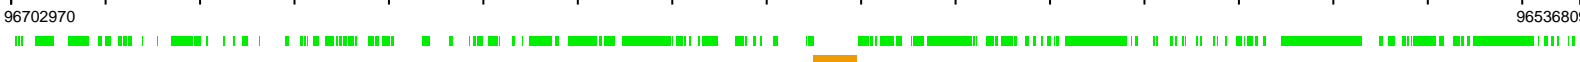

Rpts  
Gaps

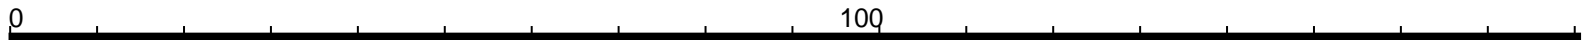

Kbases BAC

Gaps in BAC

AC216158.2

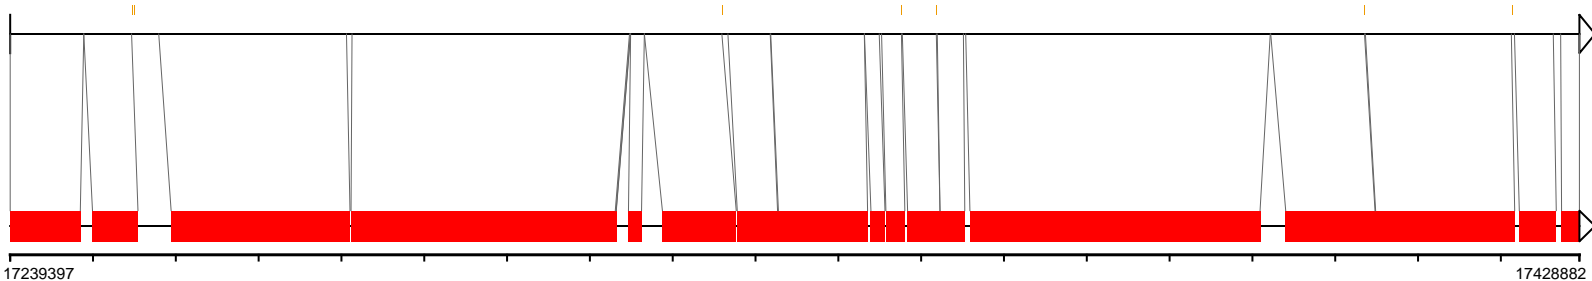

NLE7

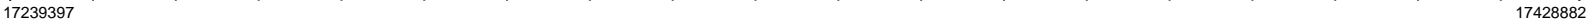

Rpts  
Gaps

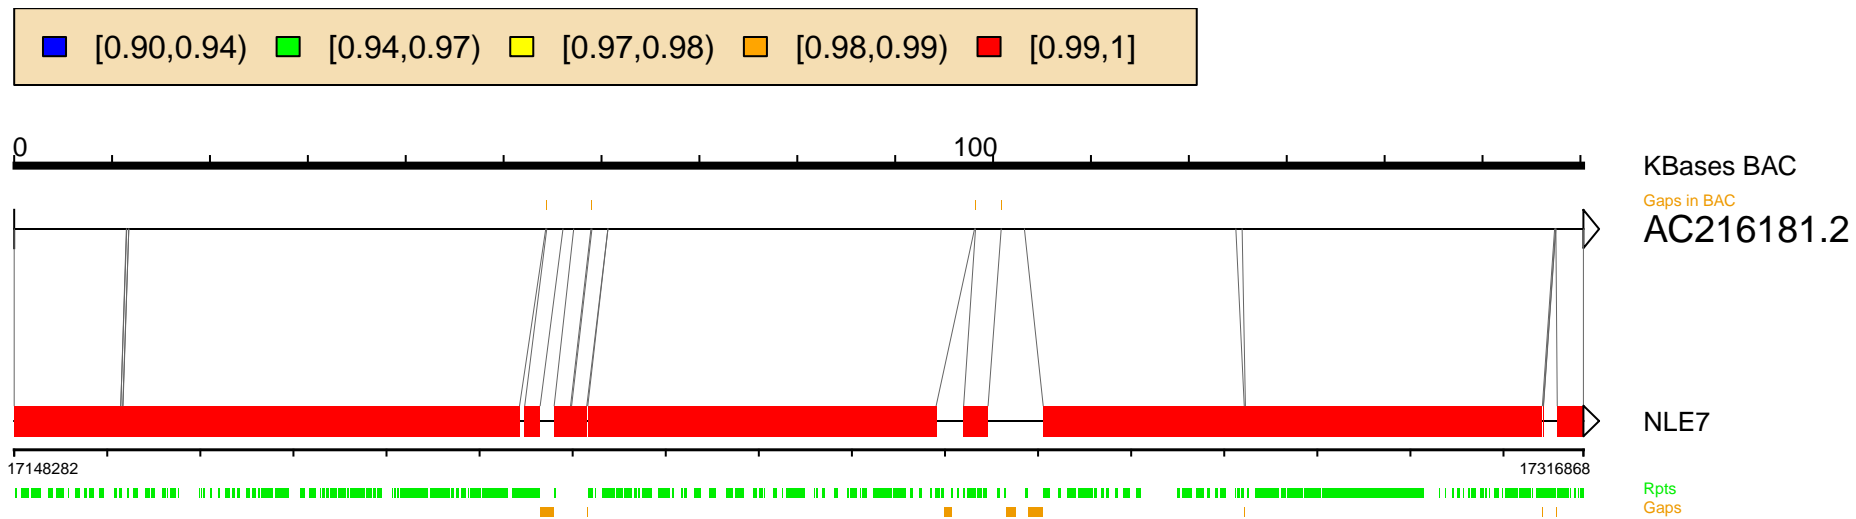

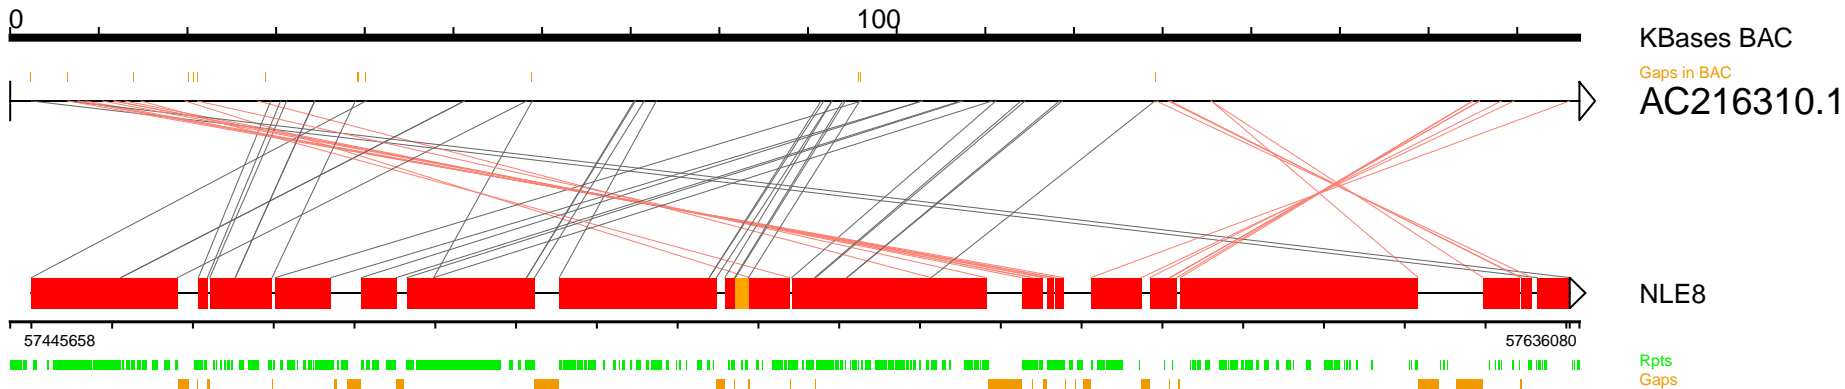

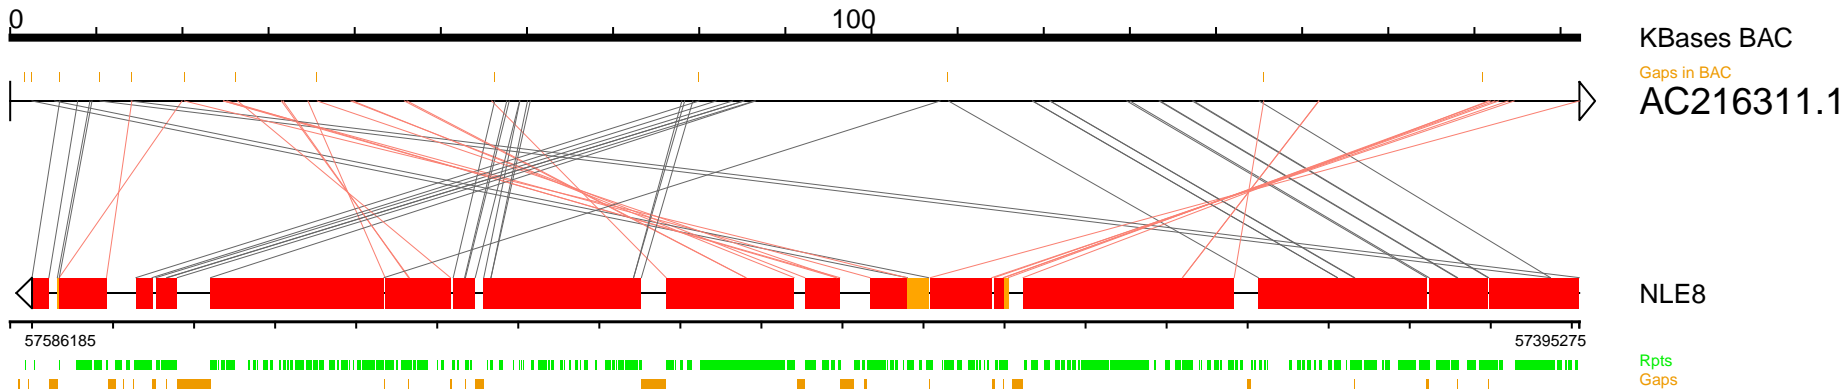

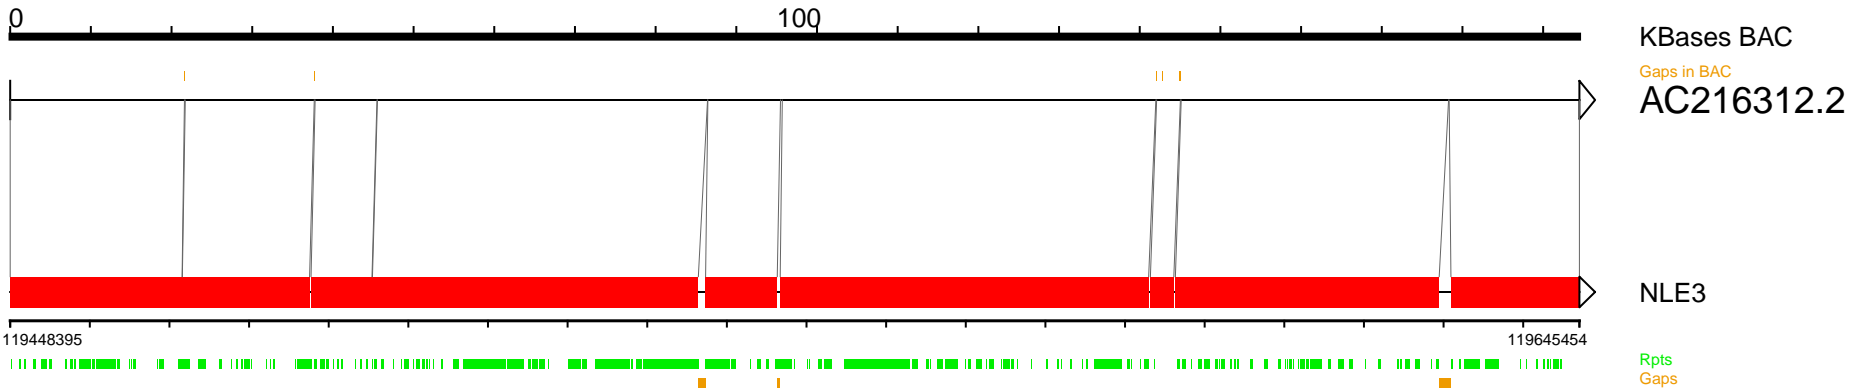

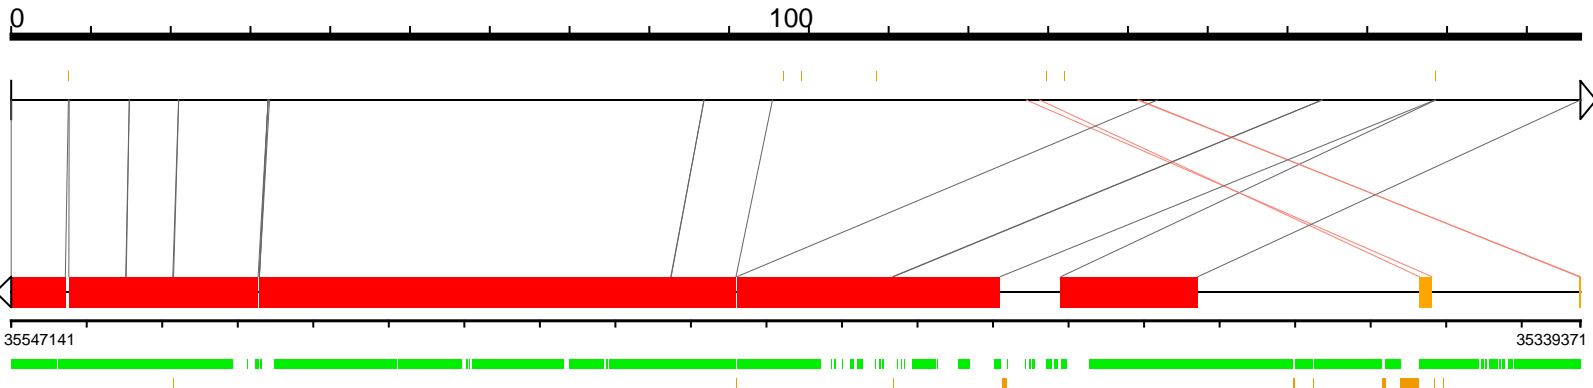

KBases BAC  
Gaps in BAC  
AC216509.2

NLEX

Rpts  
Gaps

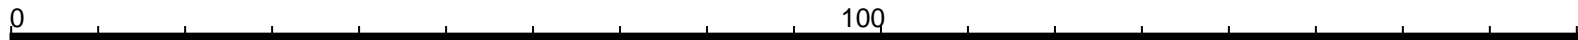

KBases BAC

Gaps in BAC

AC216986.3

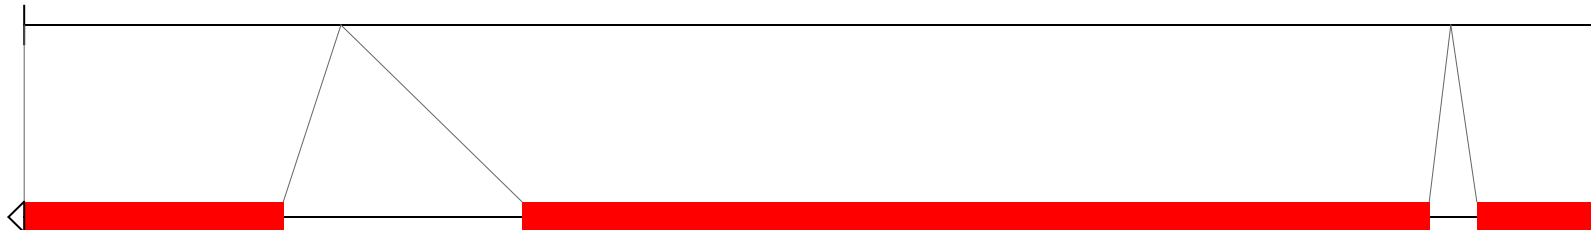

NLE17

5247279

5026768

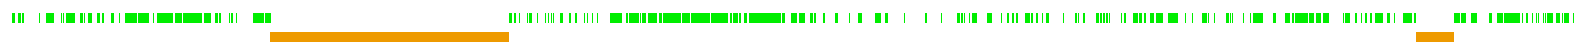

Rpts  
Gaps



KBases BAC

Gaps in BAC

AC217128.3

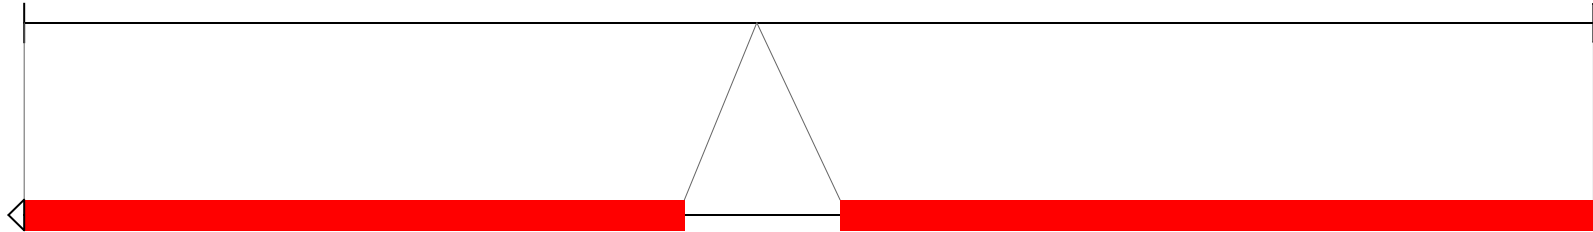

NLE22b

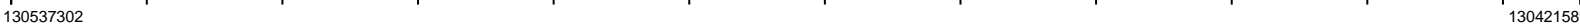

Rpts  
Gaps

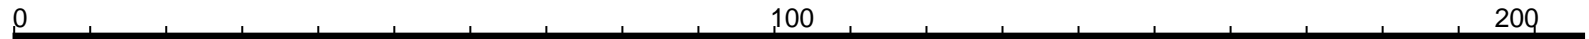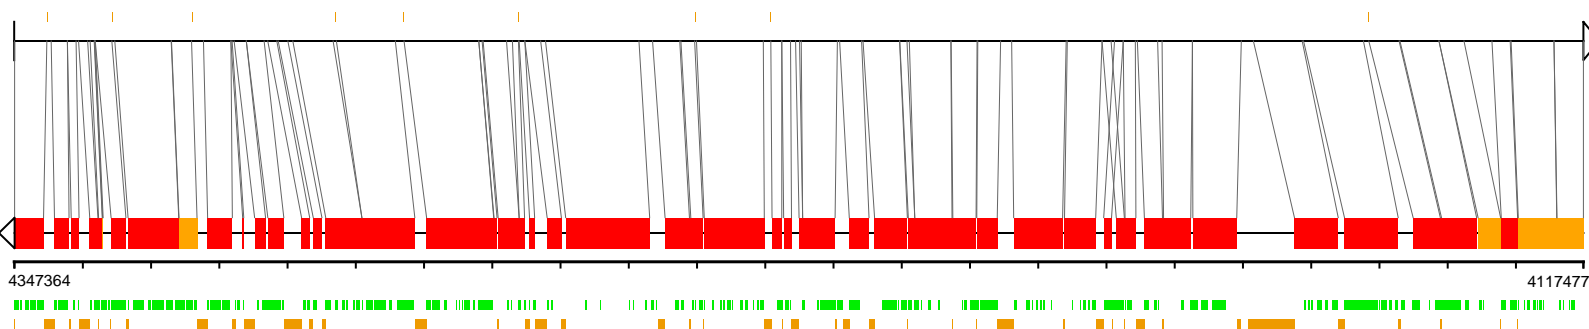

Kbases BAC  
Gaps in BAC  
AC217222.2

NLE10

Rpts  
Gaps

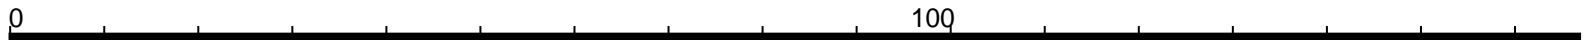

Kbases BAC

Gaps in BAC

AC217467.2

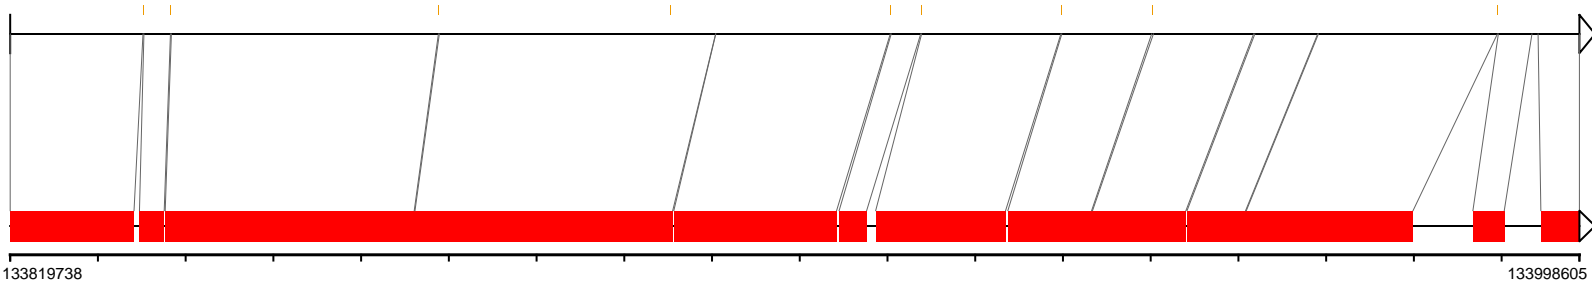

NLEX

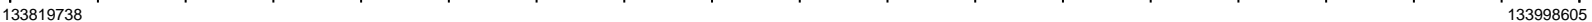

Rpts  
Gaps

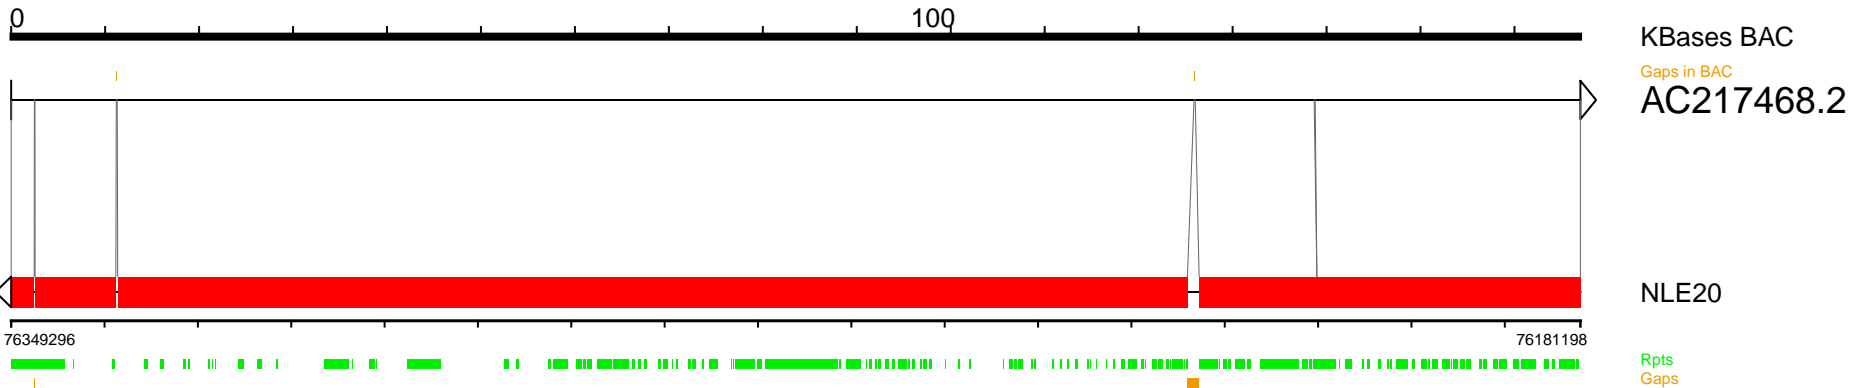

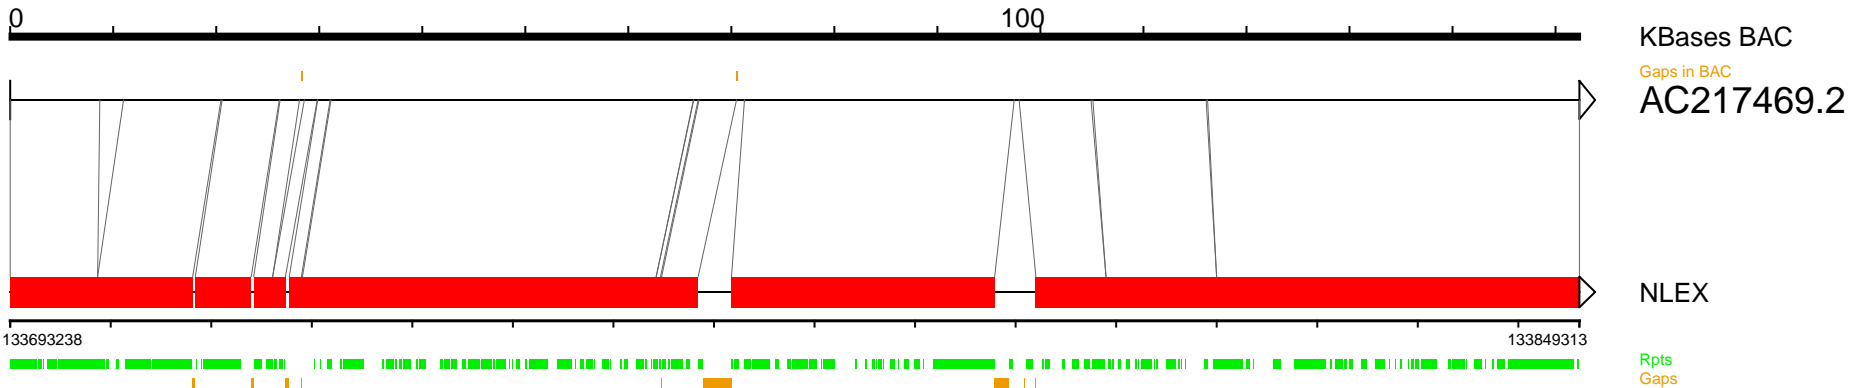

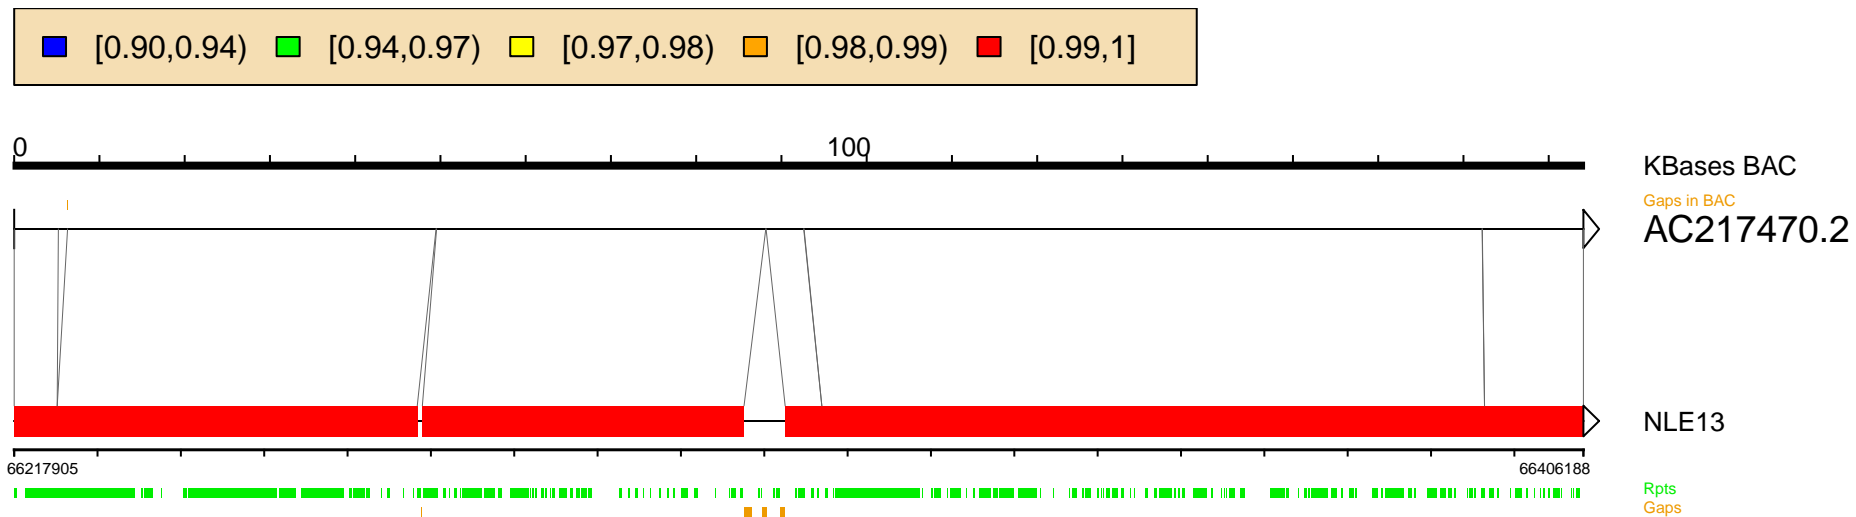

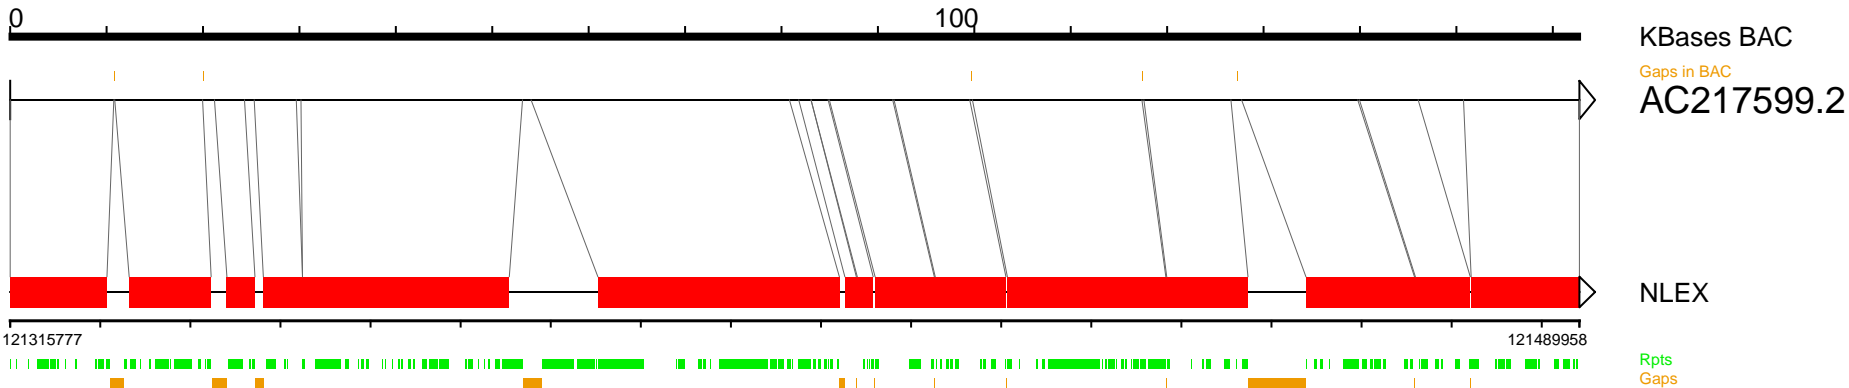

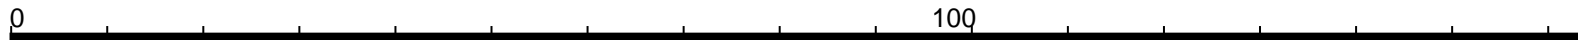

Kbases BAC

Gaps in BAC

AC217745.2

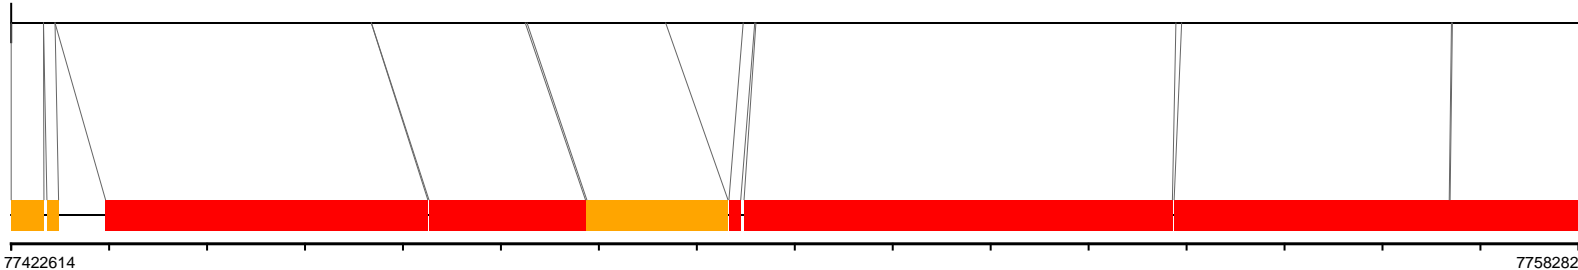

NLE1b

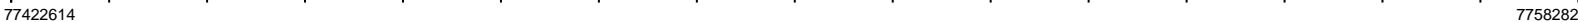

Rpts  
Gaps

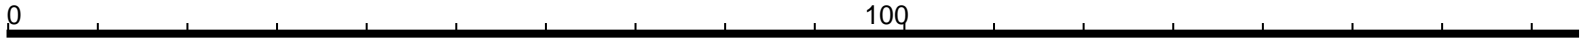

Kbases BAC  
AC217746.2

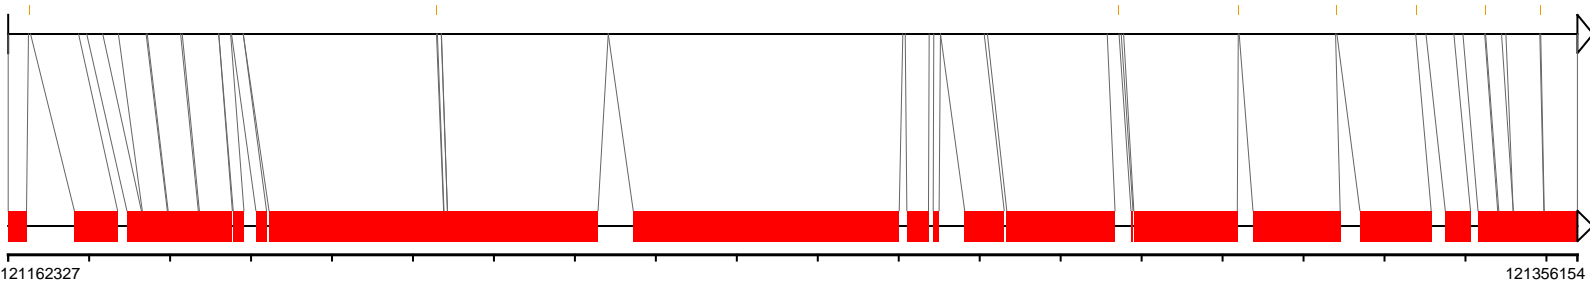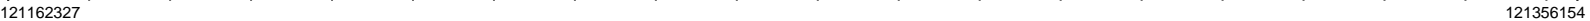

NLEX

Rpts  
Gaps

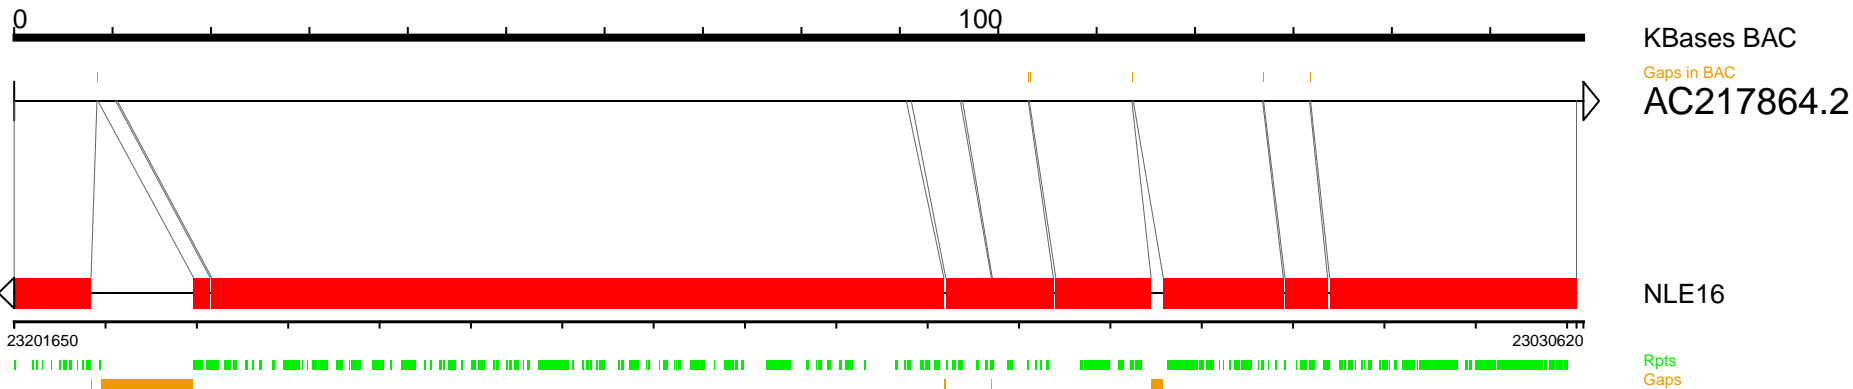

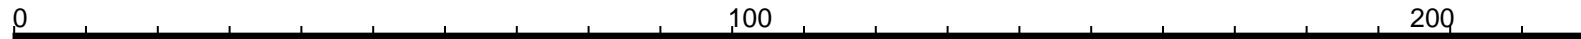

KBases BAC

Gaps in BAC

AC225266.2

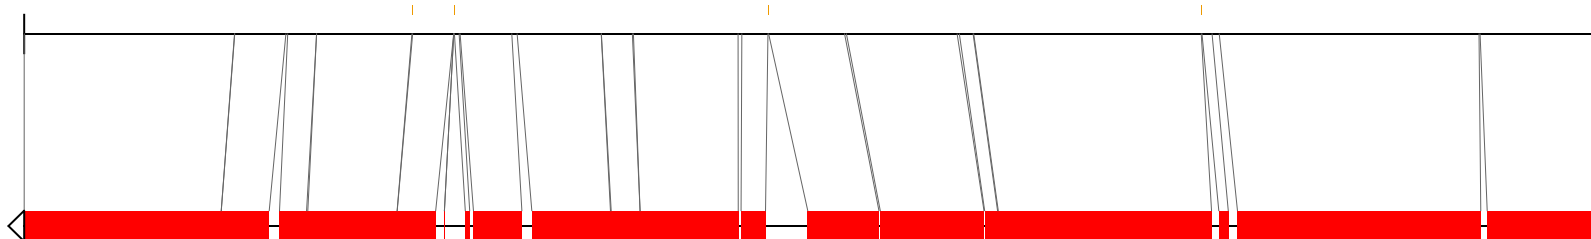

NLE20

76608528 76375353

Rpts  
Gaps

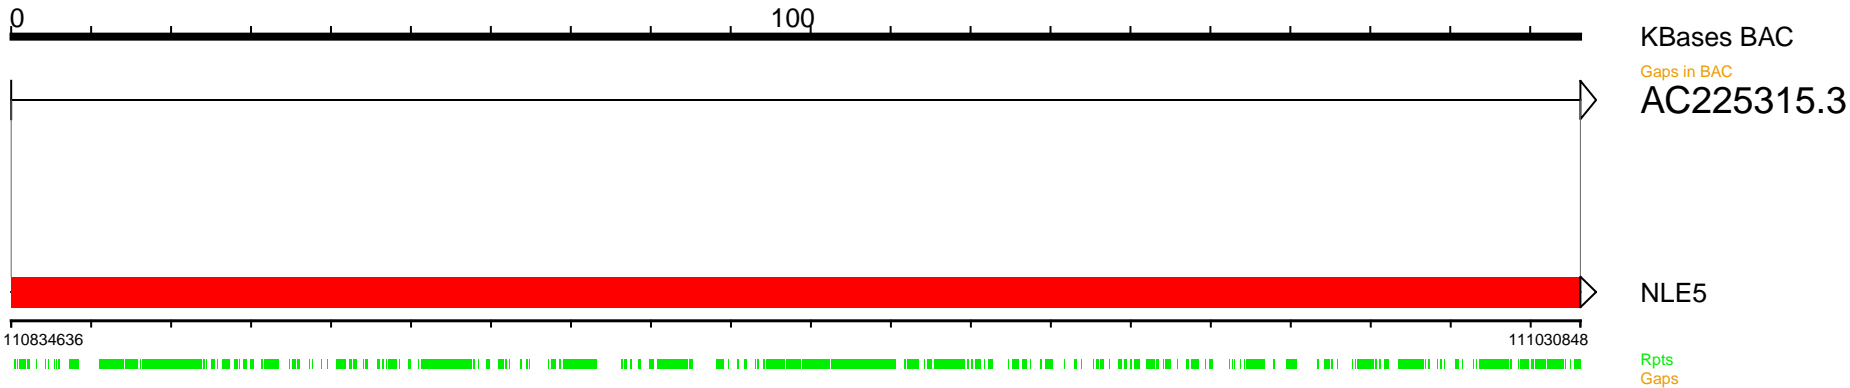

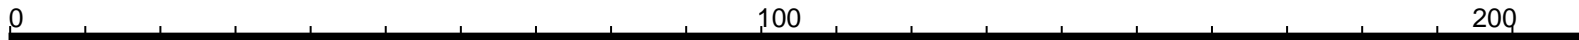

KBases BAC

Gaps in BAC

AC225372.3

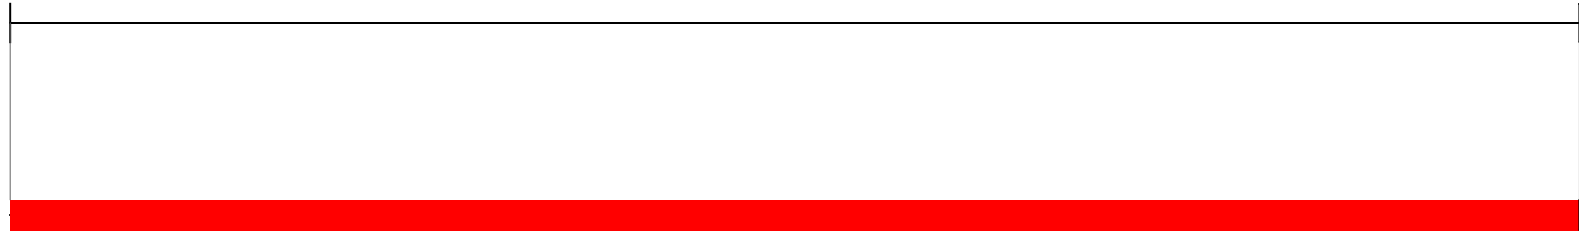

NLE4

99833042

100041847

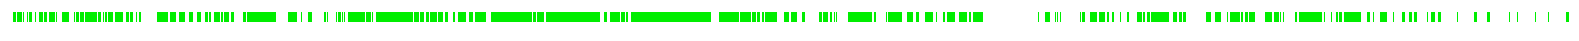

Rpts  
Gaps

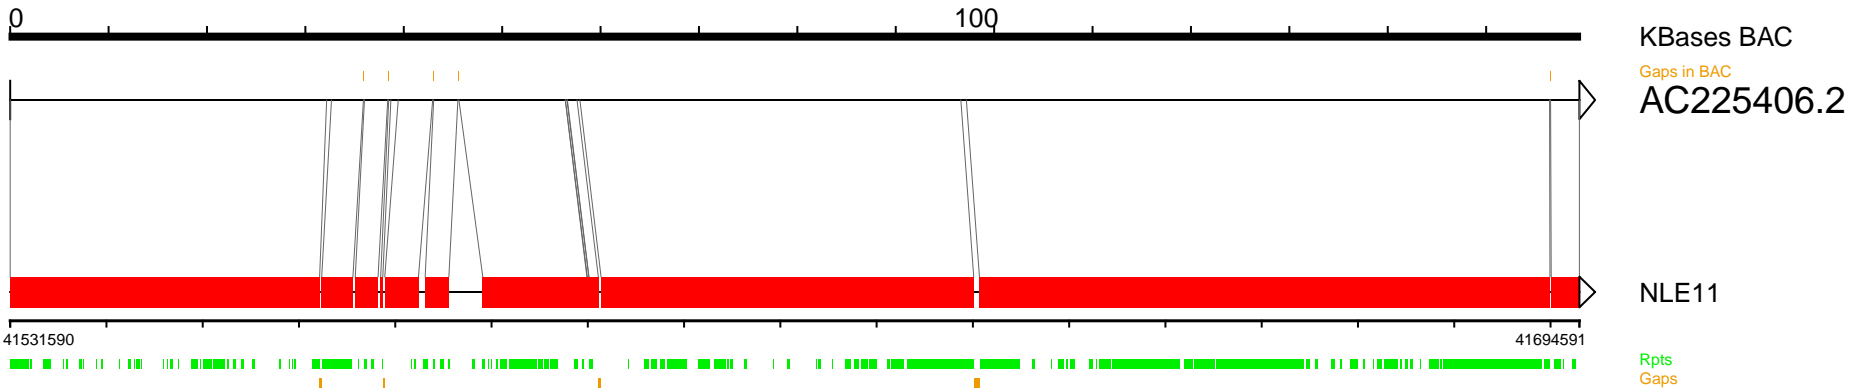

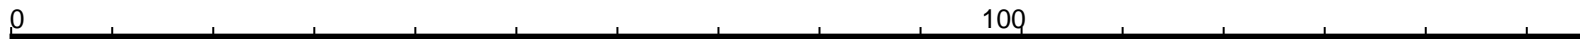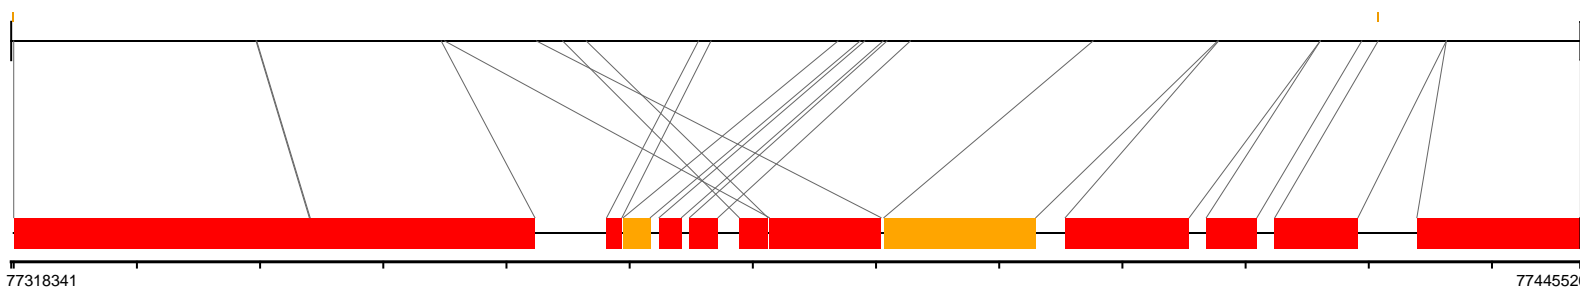

Kbases BAC  
Gaps in BAC  
AC225662.2

NLE1b

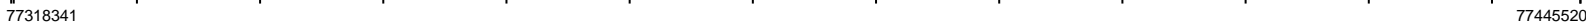

Rpts  
Gaps

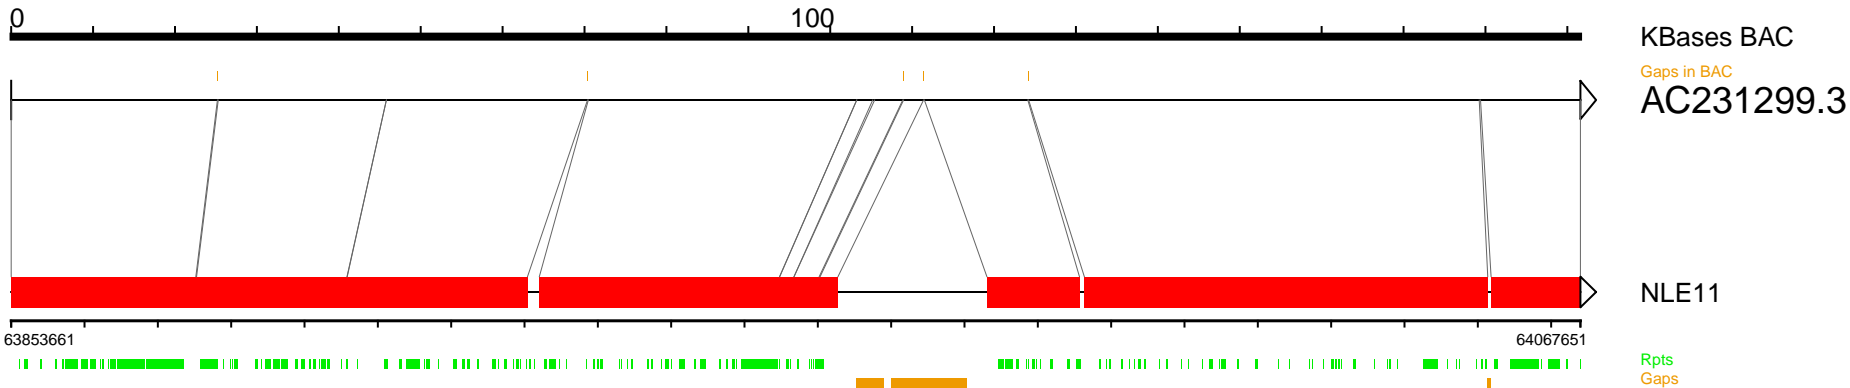

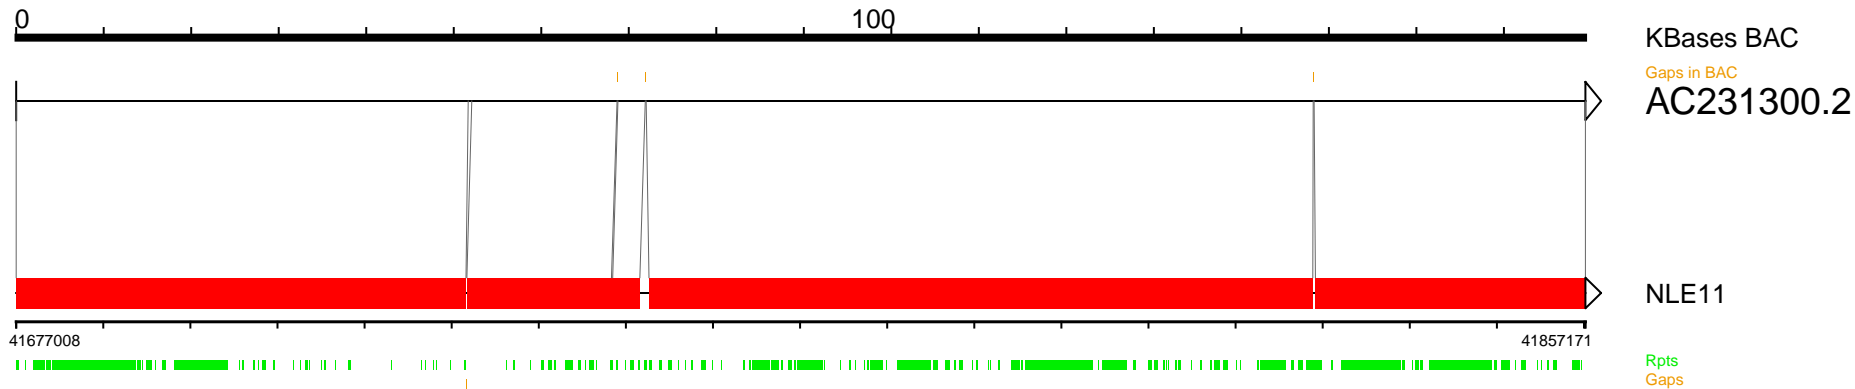

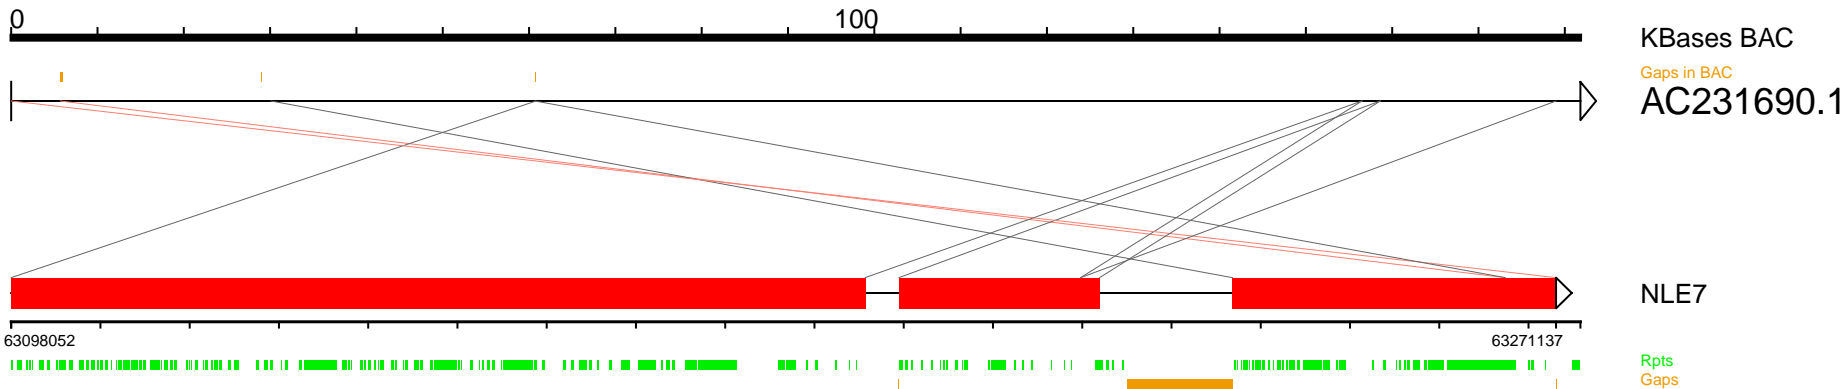

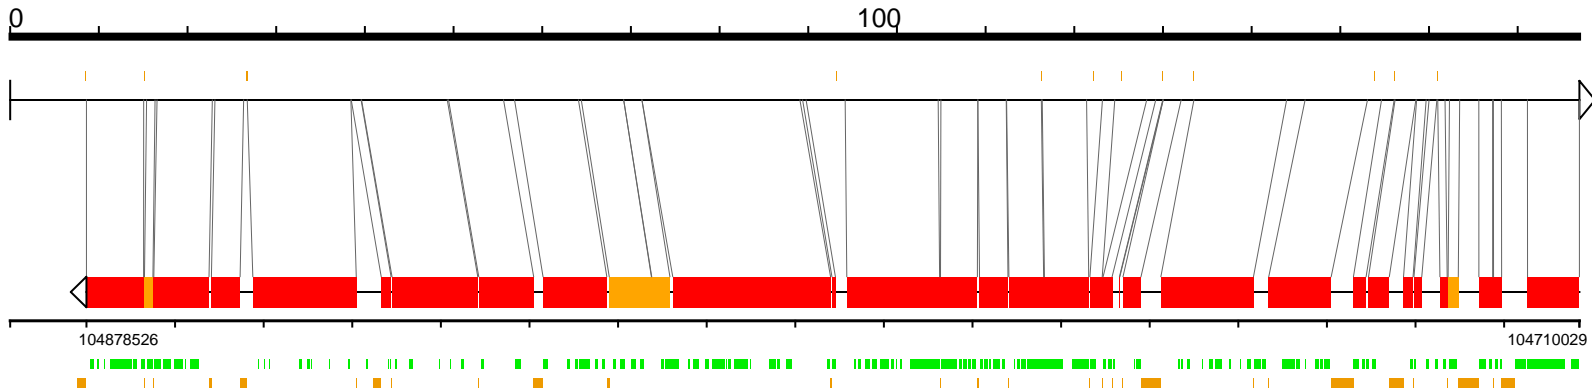

KBases BAC  
Gaps in BAC  
AC234117.2

NLE18

Rpts  
Gaps

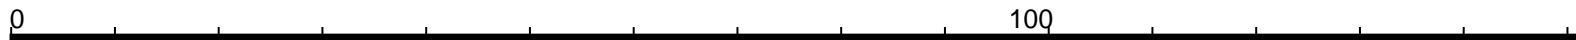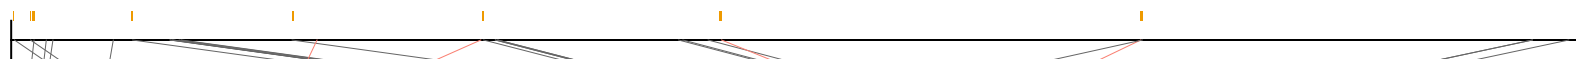

KBases BAC  
Gaps in BAC  
AC234673.1

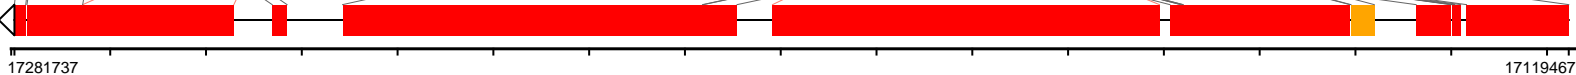

NLE7

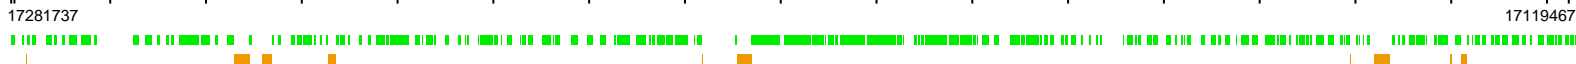

Rpts  
Gaps

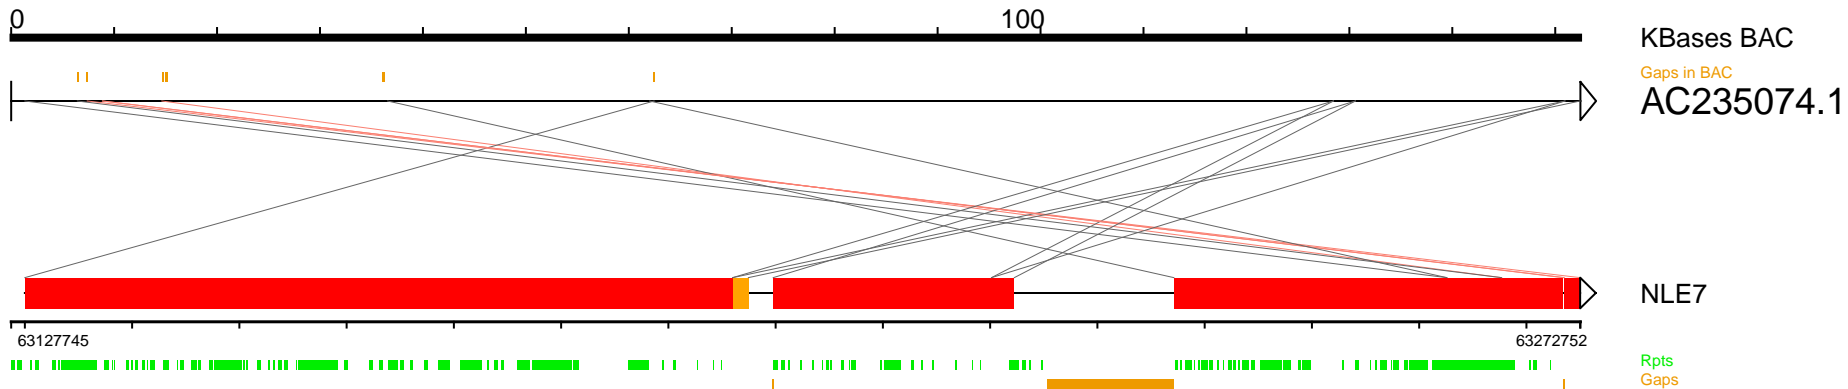

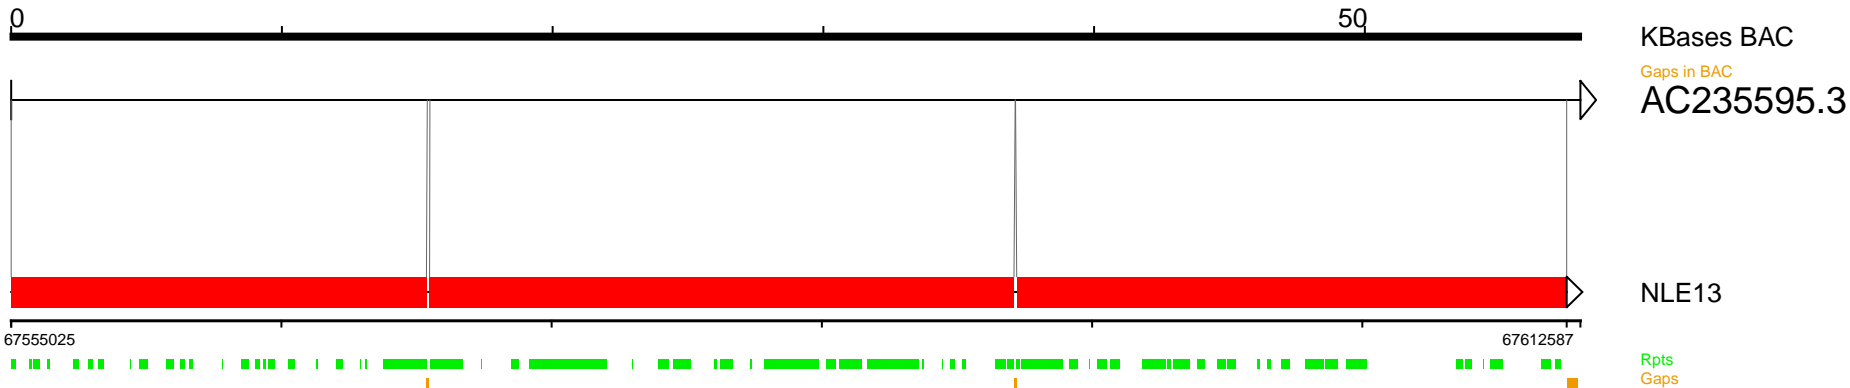

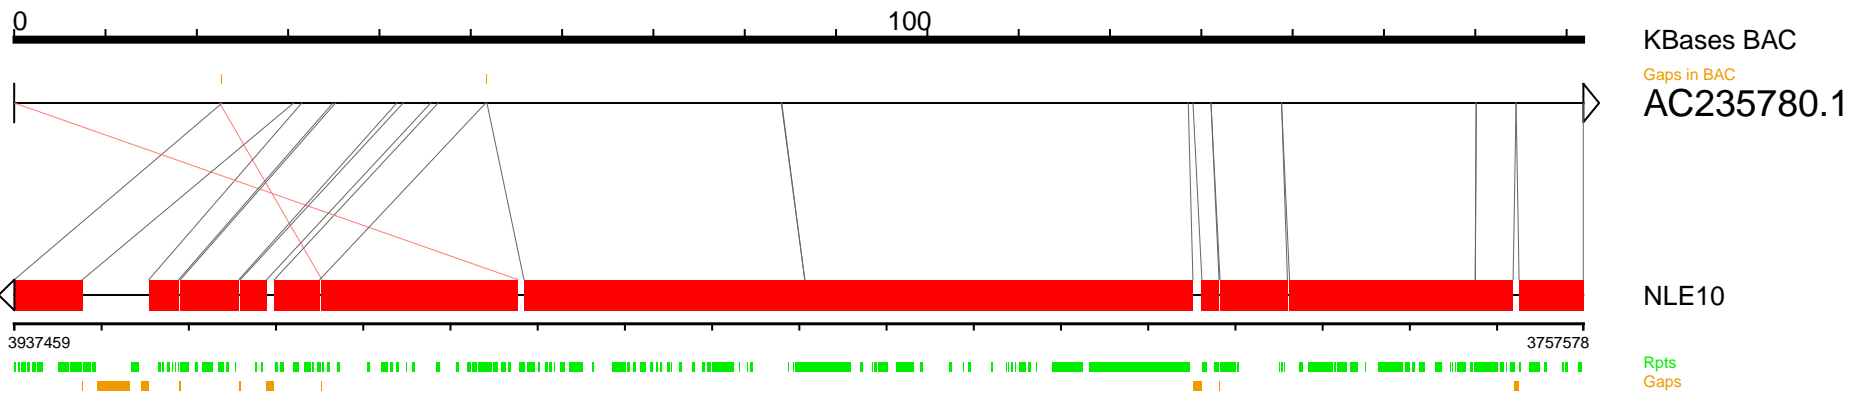

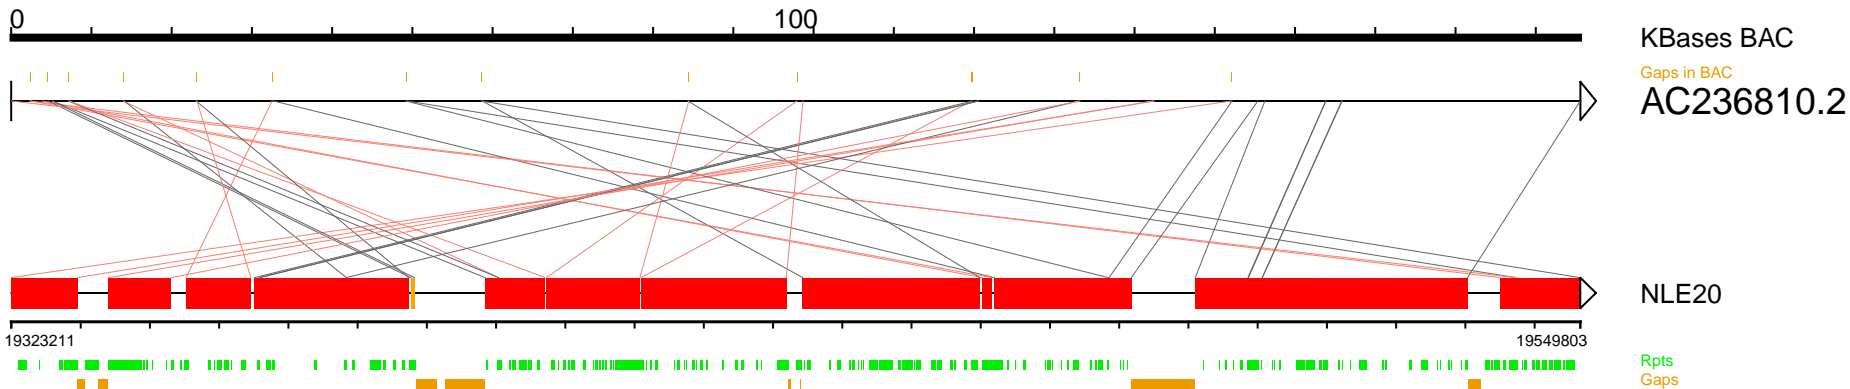

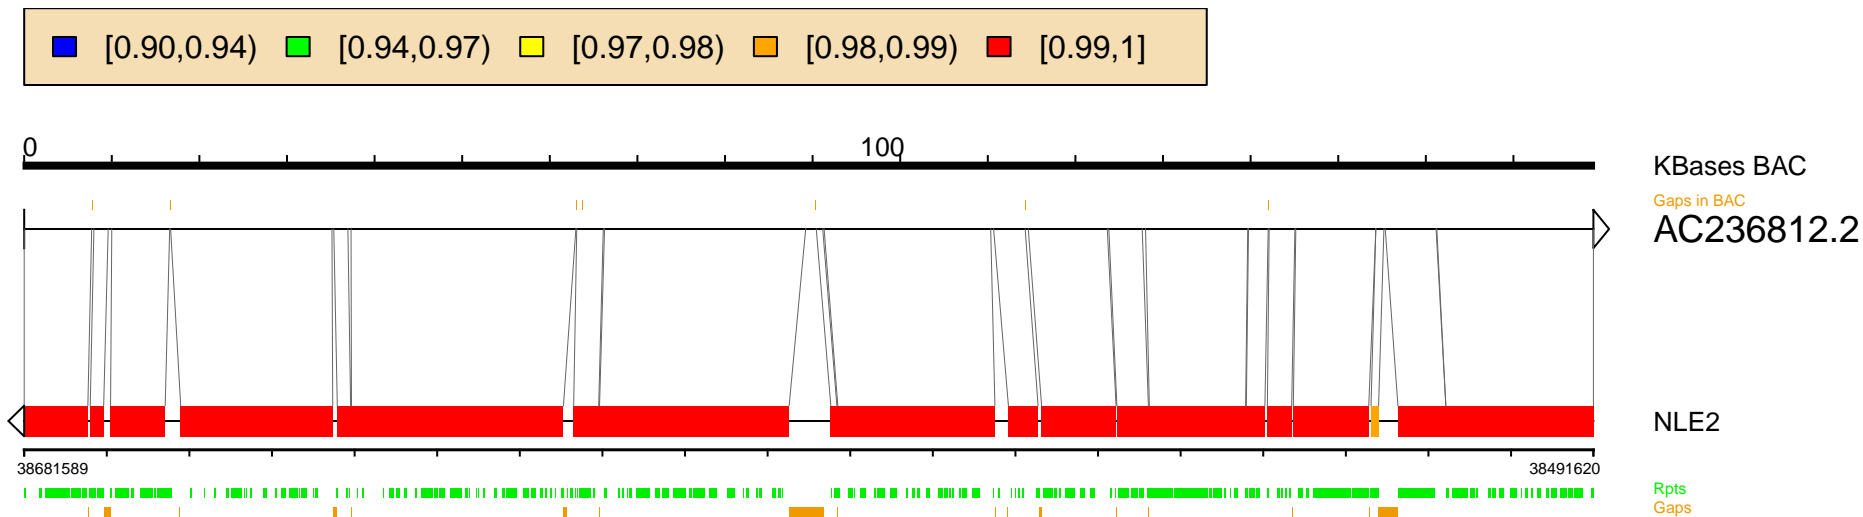

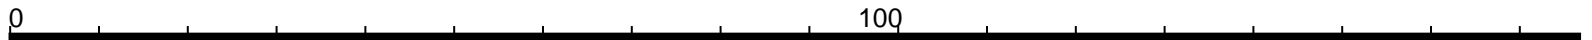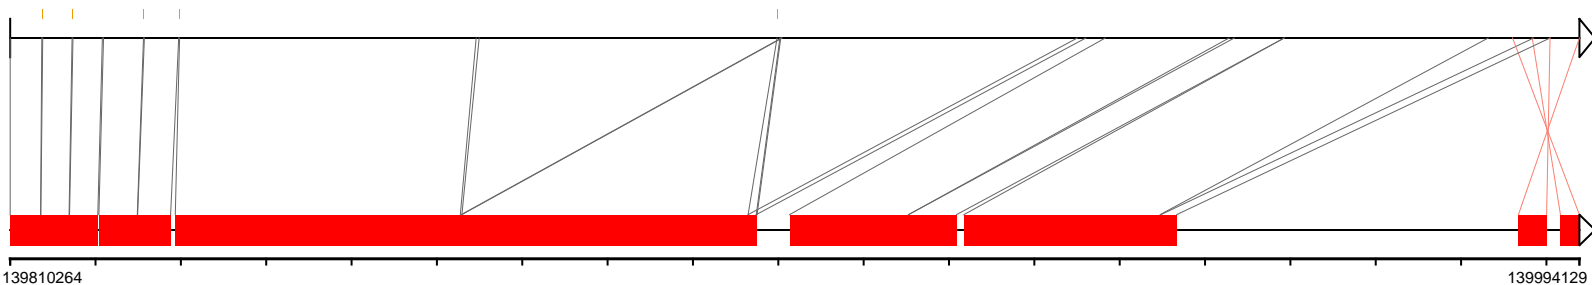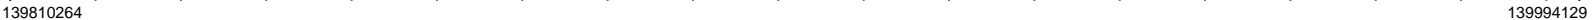

KBases BAC  
Gaps in BAC  
AC238666.2

NLEX

Rpts  
Gaps

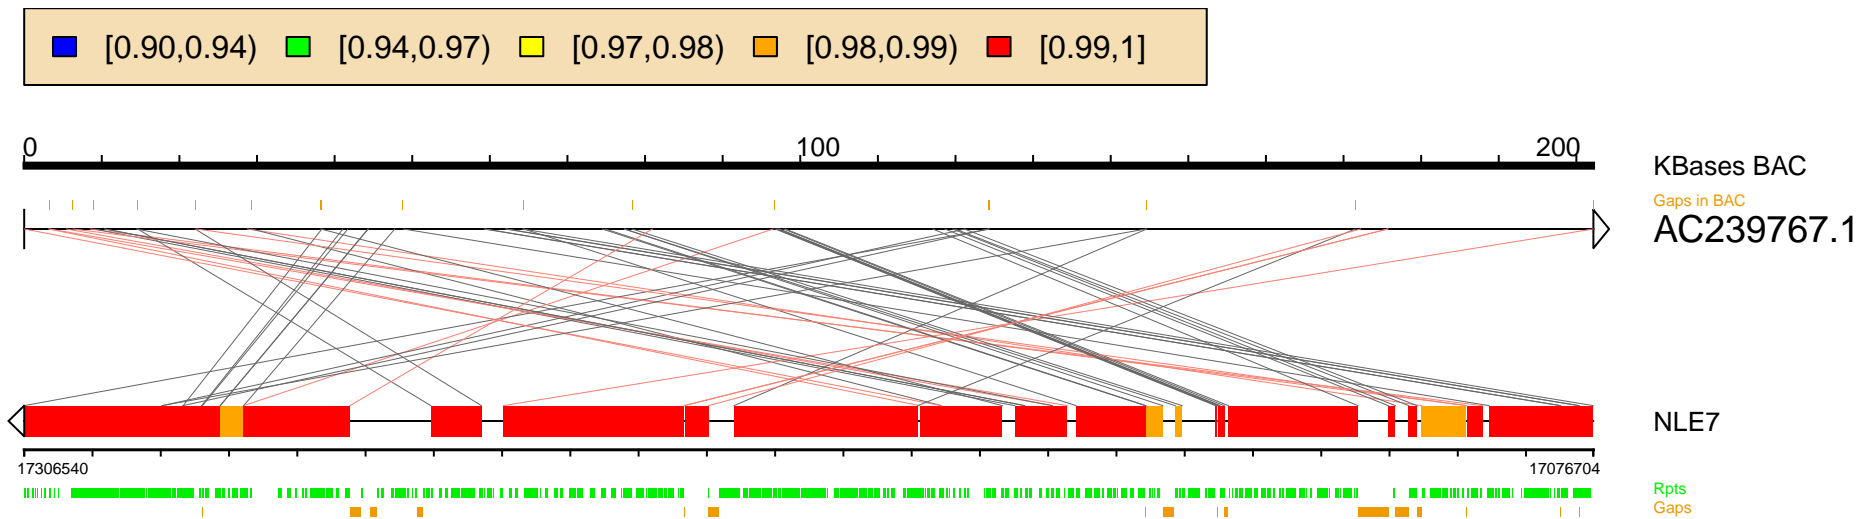

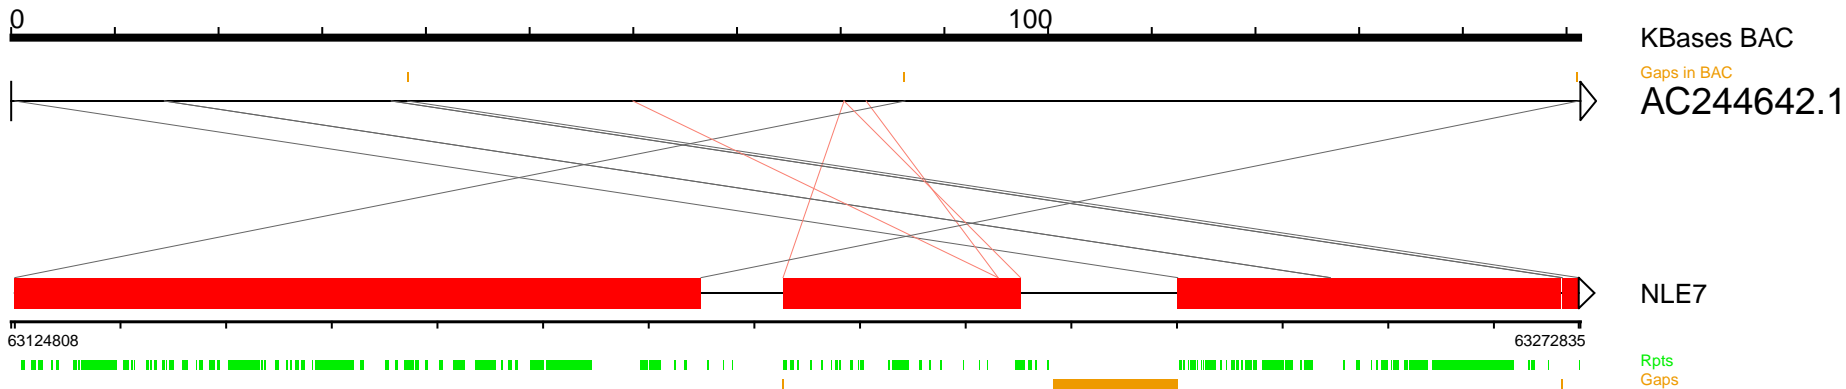



KBases BAC

Gaps in BAC

CT954289.3

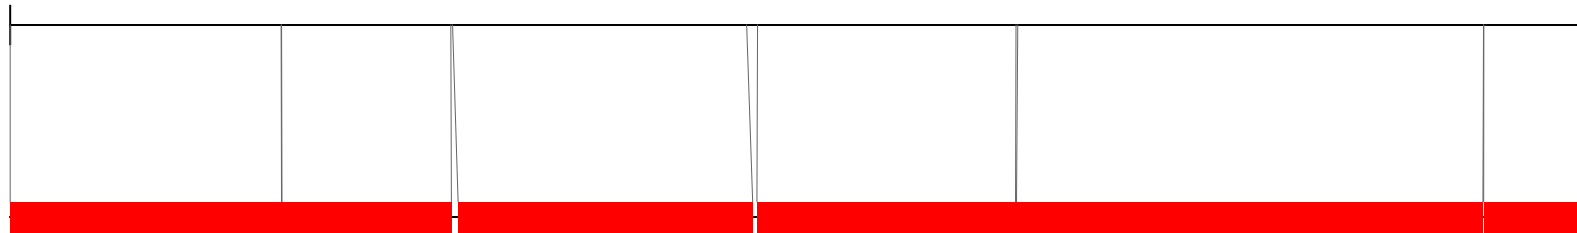

NLE16

69436613

69649622

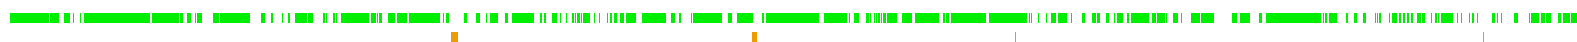

Rpts  
Gaps

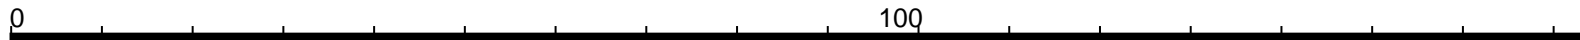

Kbases BAC

Gaps in BAC

CT954292.2

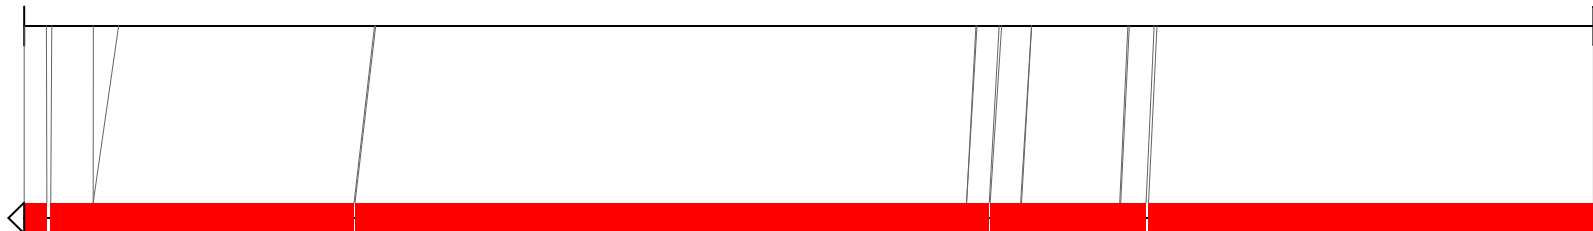

NLE13

50378187 50208543

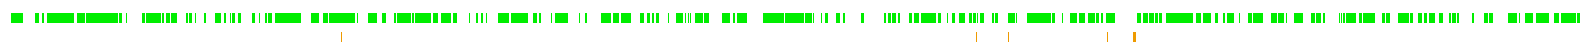

Rpts  
Gaps

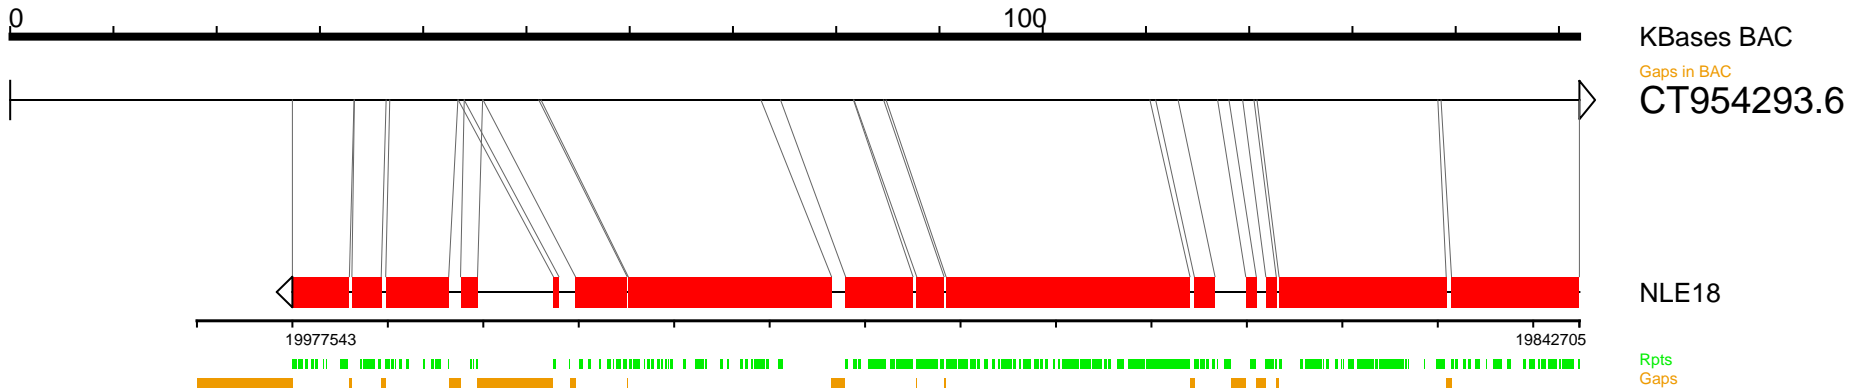

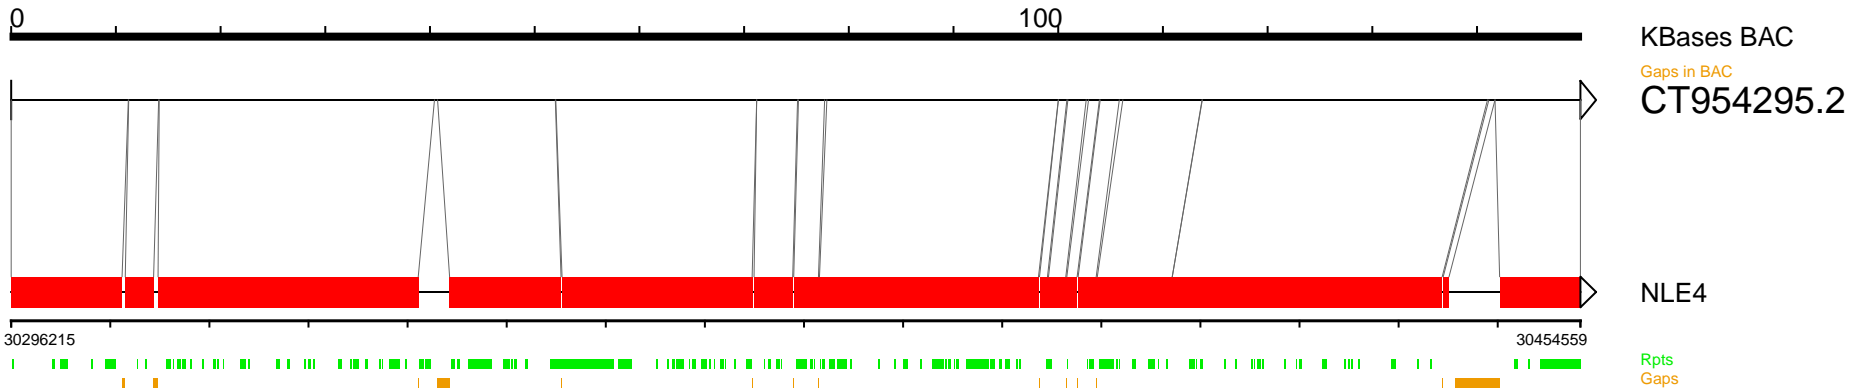

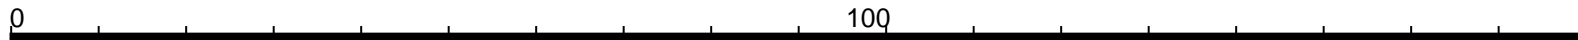

Kbases BAC

Gaps in BAC

CT954299.8

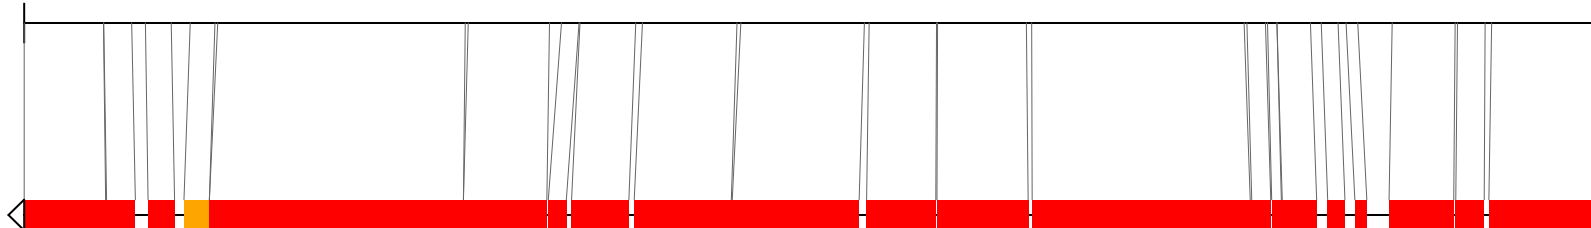

NLE14\_random\_GL397534

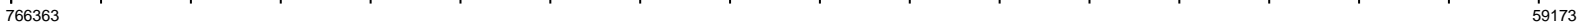

Rpts  
Gaps

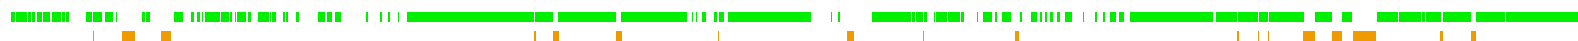

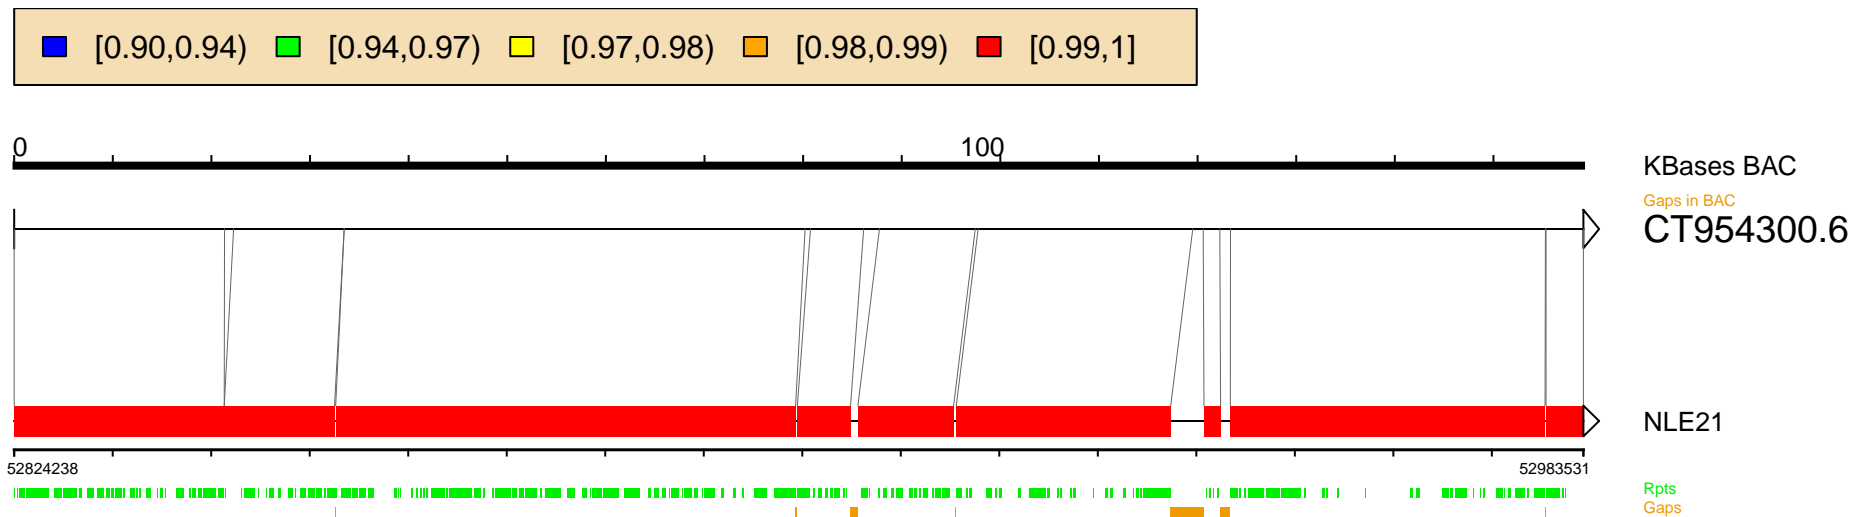

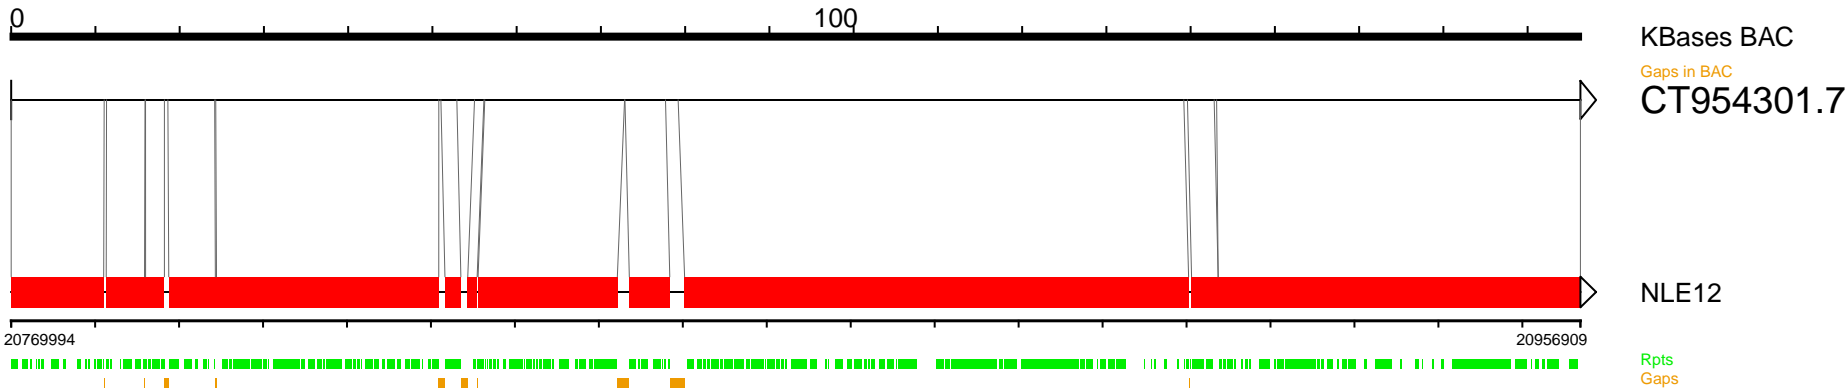

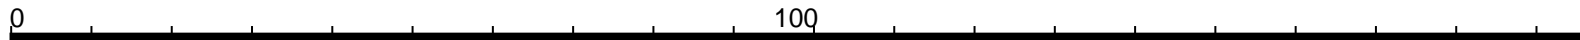

Kbases BAC

Gaps in BAC

CT954302.6

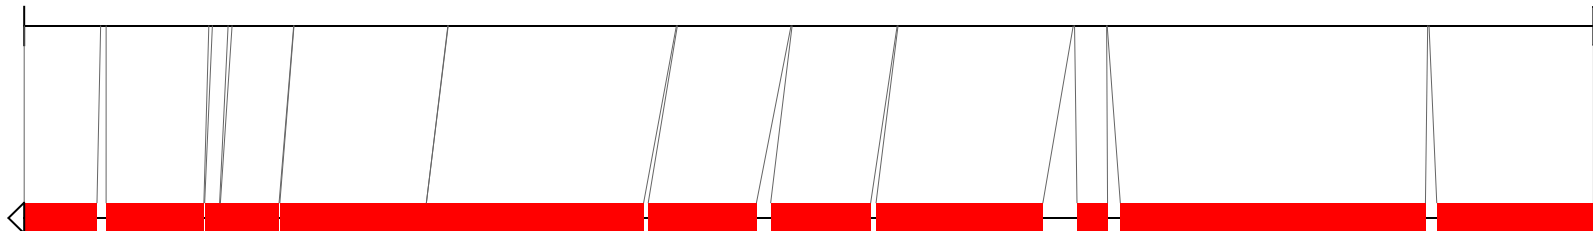

NLE19

27842904 27637662

Rpts  
Gaps

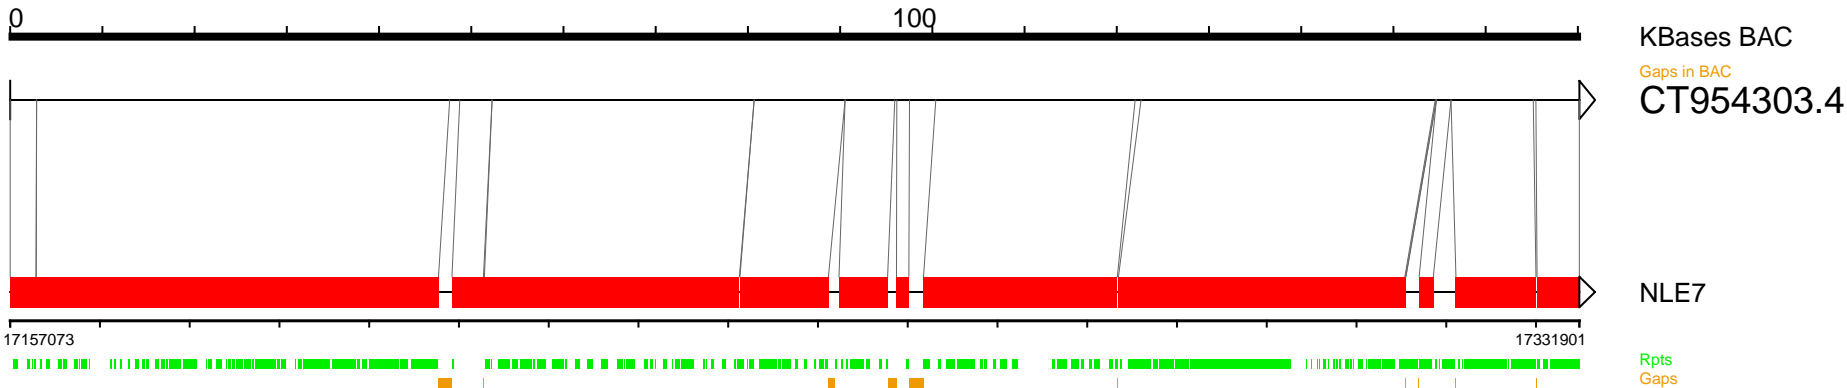

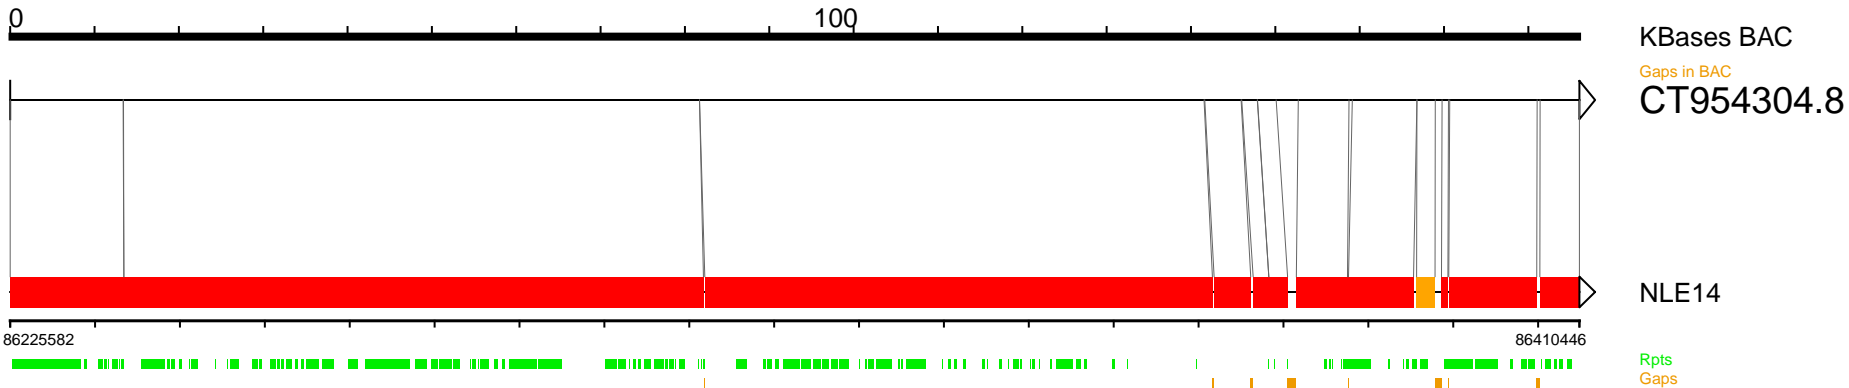



Kbases BAC

Gaps in BAC

CT954305.14

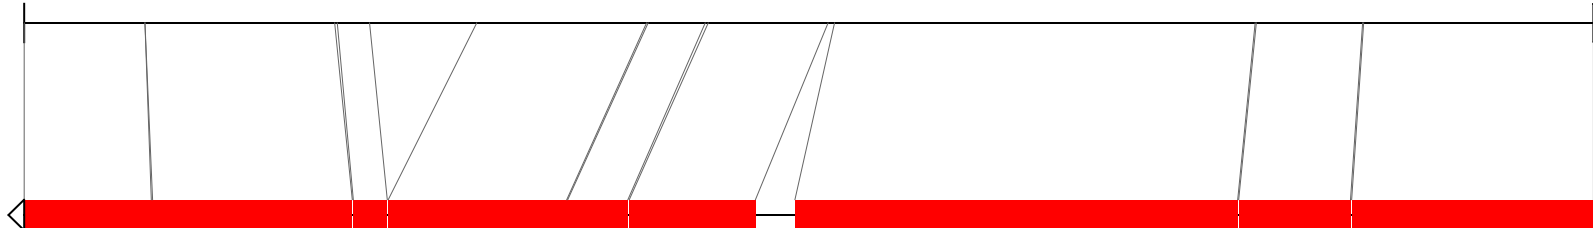

NLE7

46058234 45897430

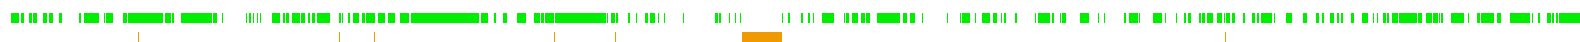

Rpts  
Gaps

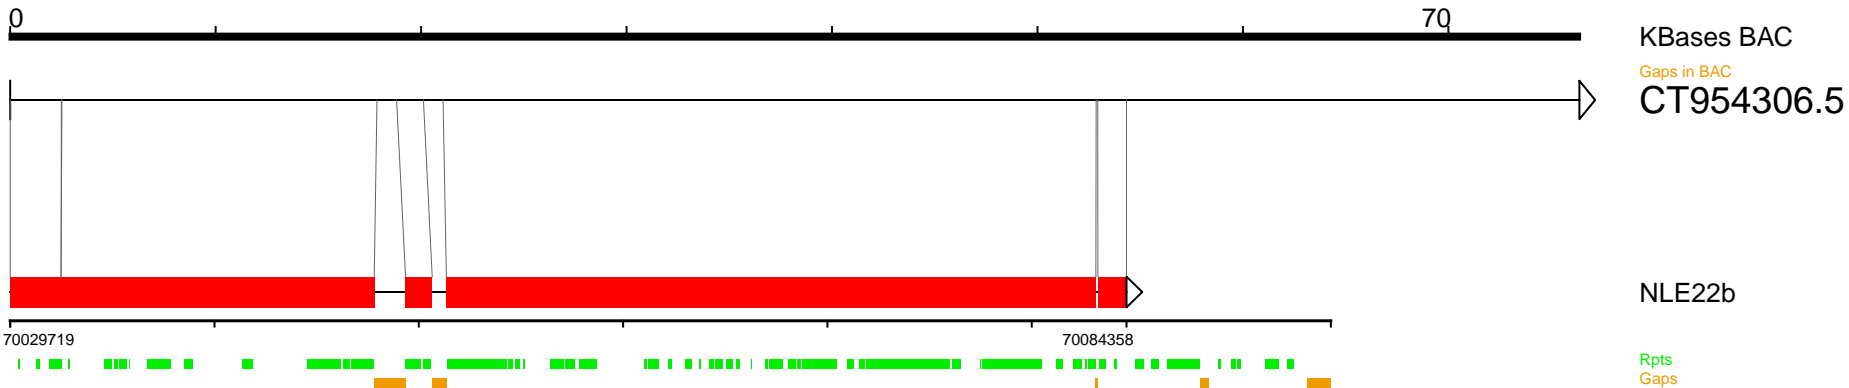

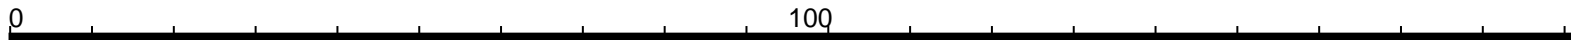

Kbases BAC

Gaps in BAC

CT954310.8

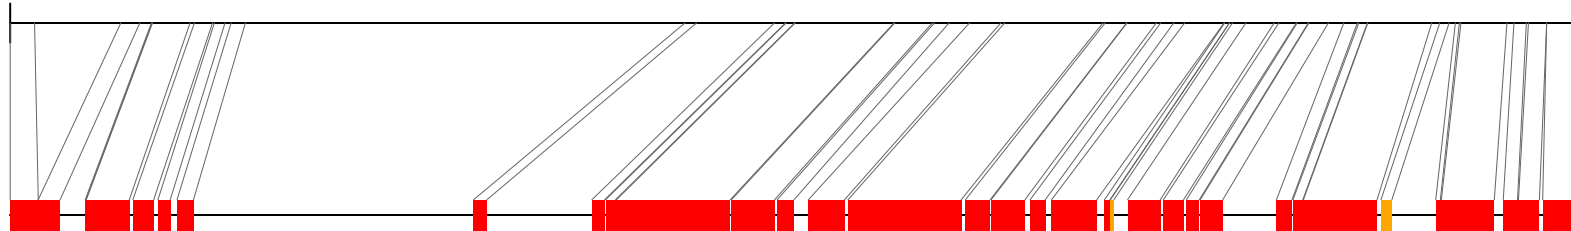

NLE17

37504178

37669922

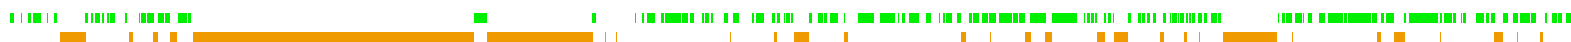

Rpts  
Gaps

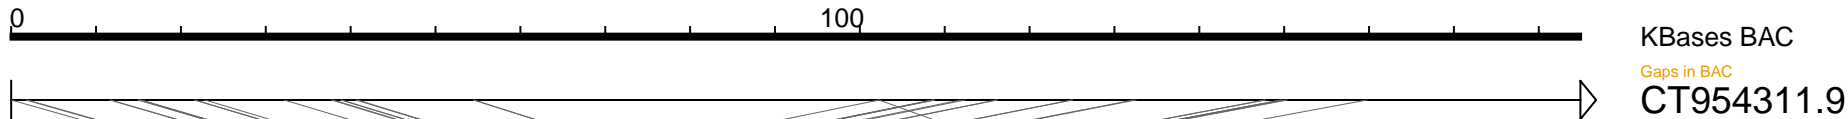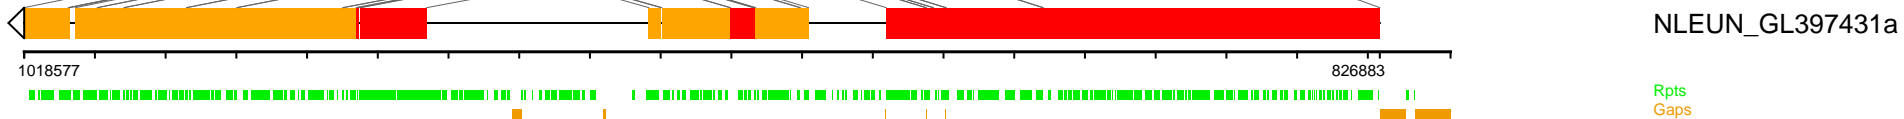

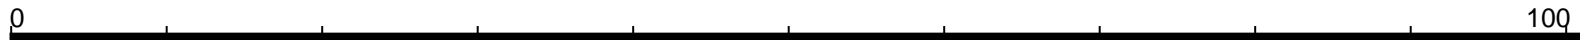

KBases BAC

Gaps in BAC

CT954314.7

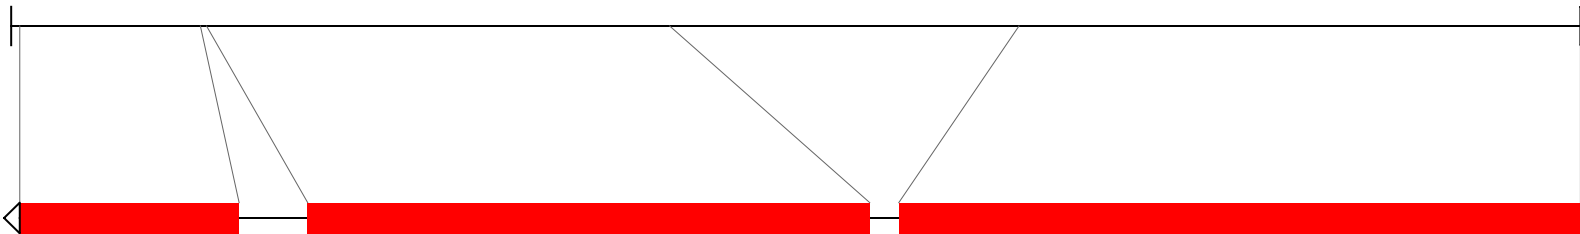

NLE14\_random\_GL397526

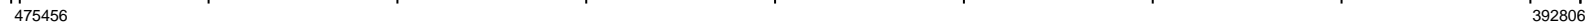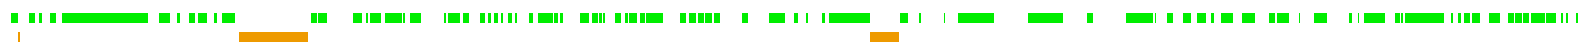



Kbases BAC

Gaps in BAC

CT954315.7



NLE18

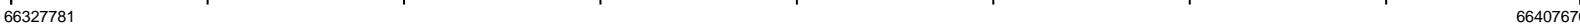

Rpts  
Gaps

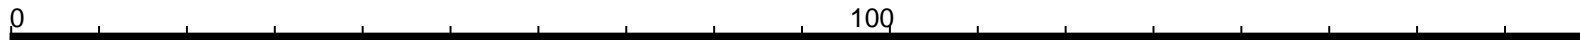

Kbases BAC

Gaps in BAC

CT954316.4

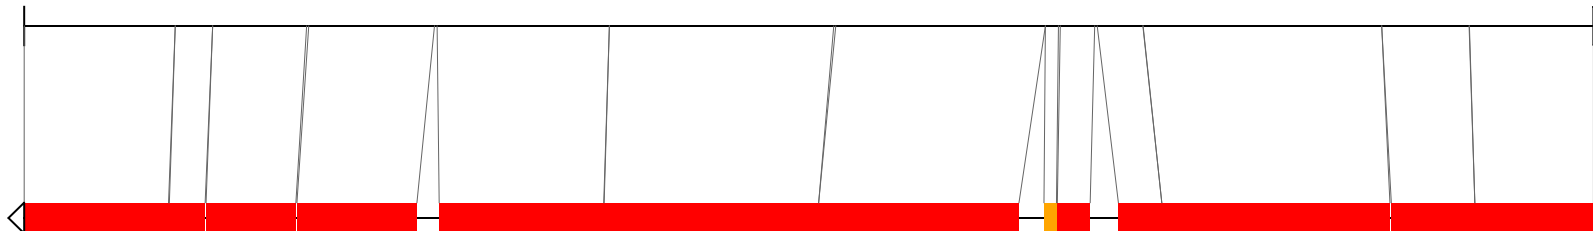

NLE22b

84934476

84747653

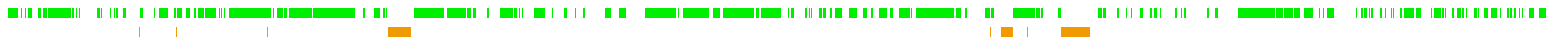

Rpts  
Gaps

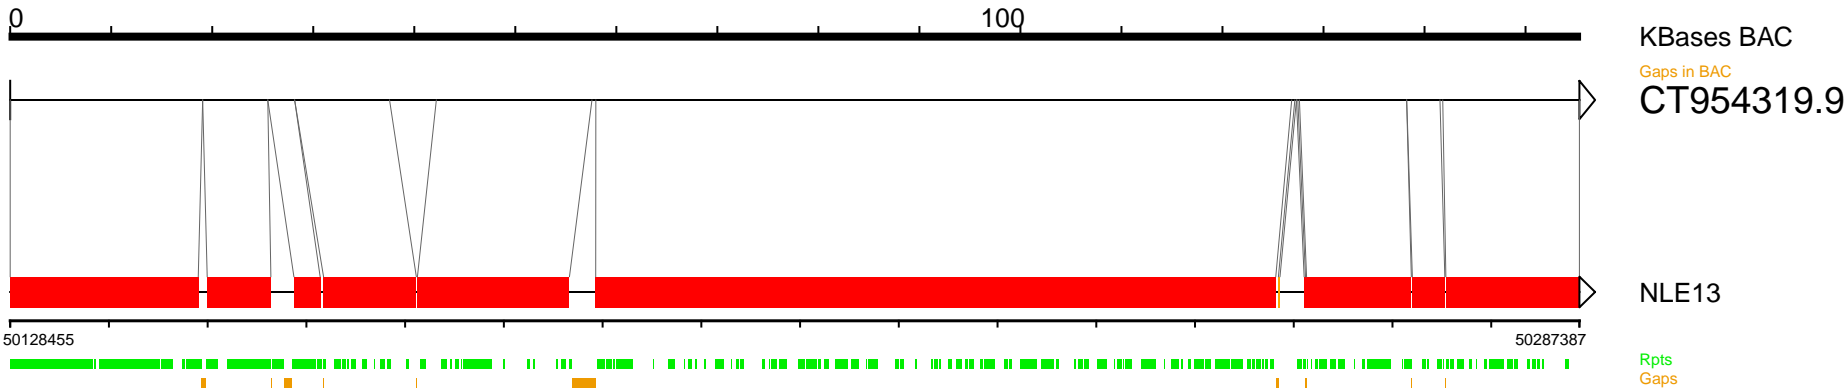

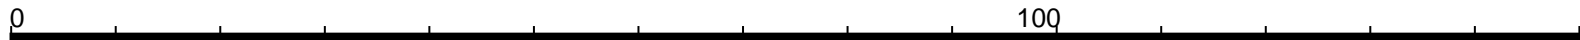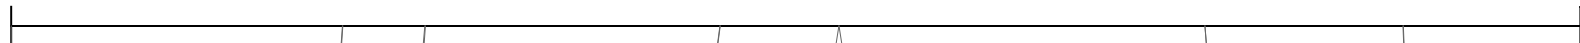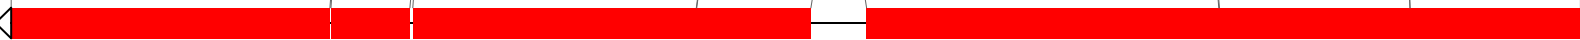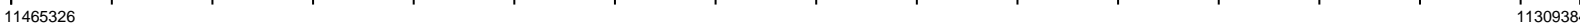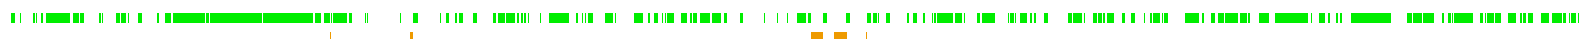

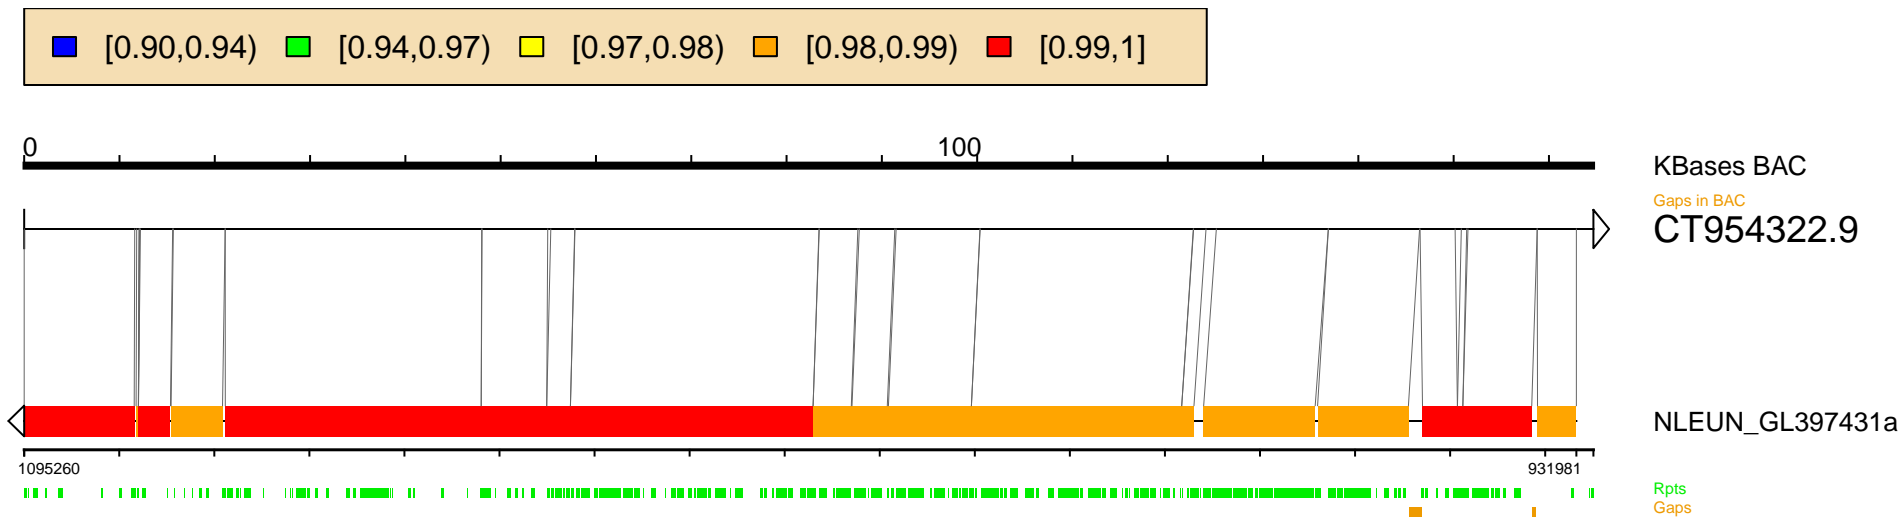

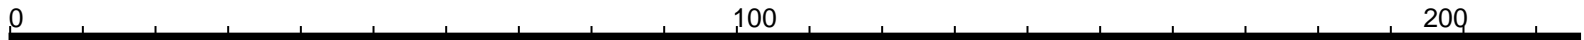

Kbases BAC

Gaps in BAC

CT990552.5

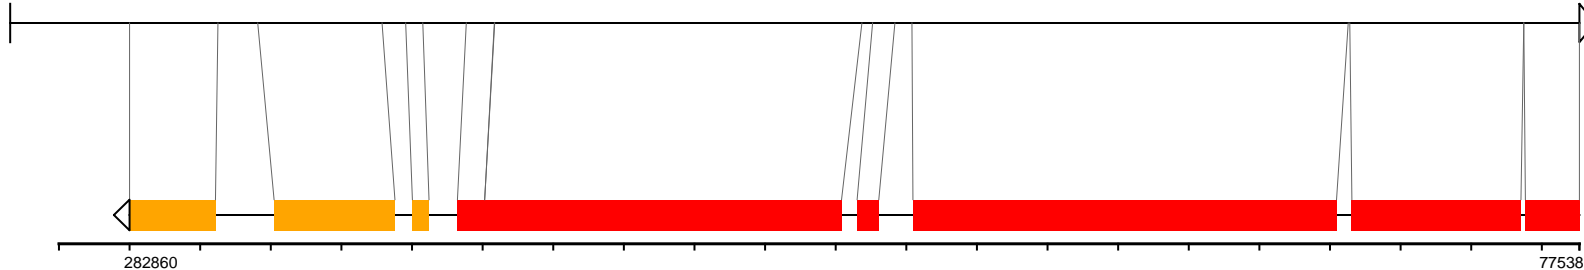

NLE4\_random\_GL397525

Rpts  
Gaps

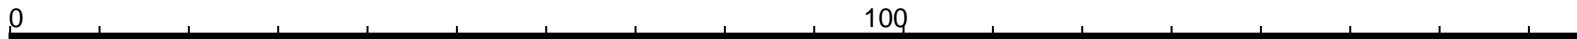

Kbases BAC

Gaps in BAC

CT990554.14

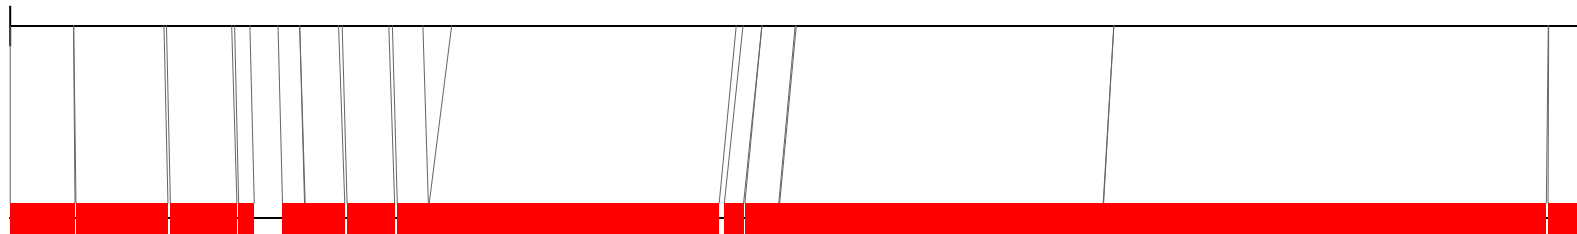

NLE16

26783852

26956173

Rpts  
Gaps
